# Supplementary material for: Ecological adaptation in Atlantic herring is associated with large shifts in allele frequencies at hundreds of loci
Source: eLife journal article supplement (doi:10.7554/elife.61076), 2020-12-04

**a**

Baltic Spring vs Atlantic Spring

**i**

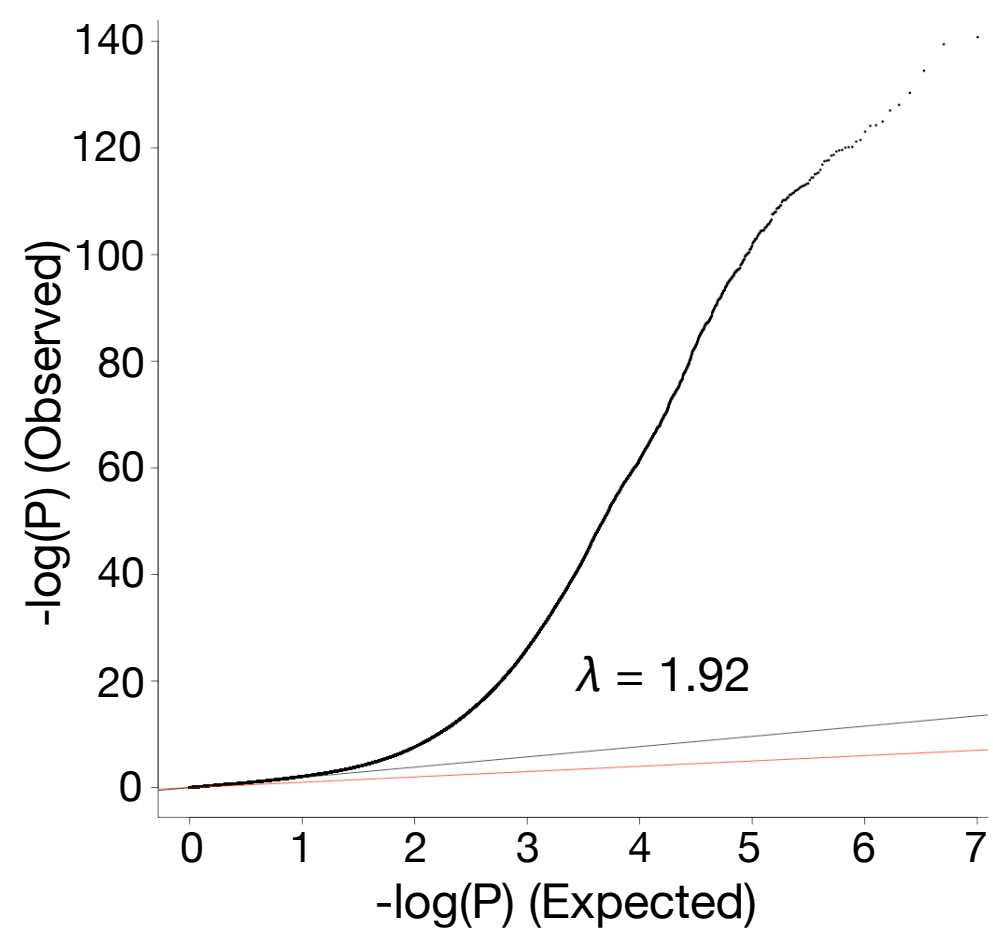

**ii**

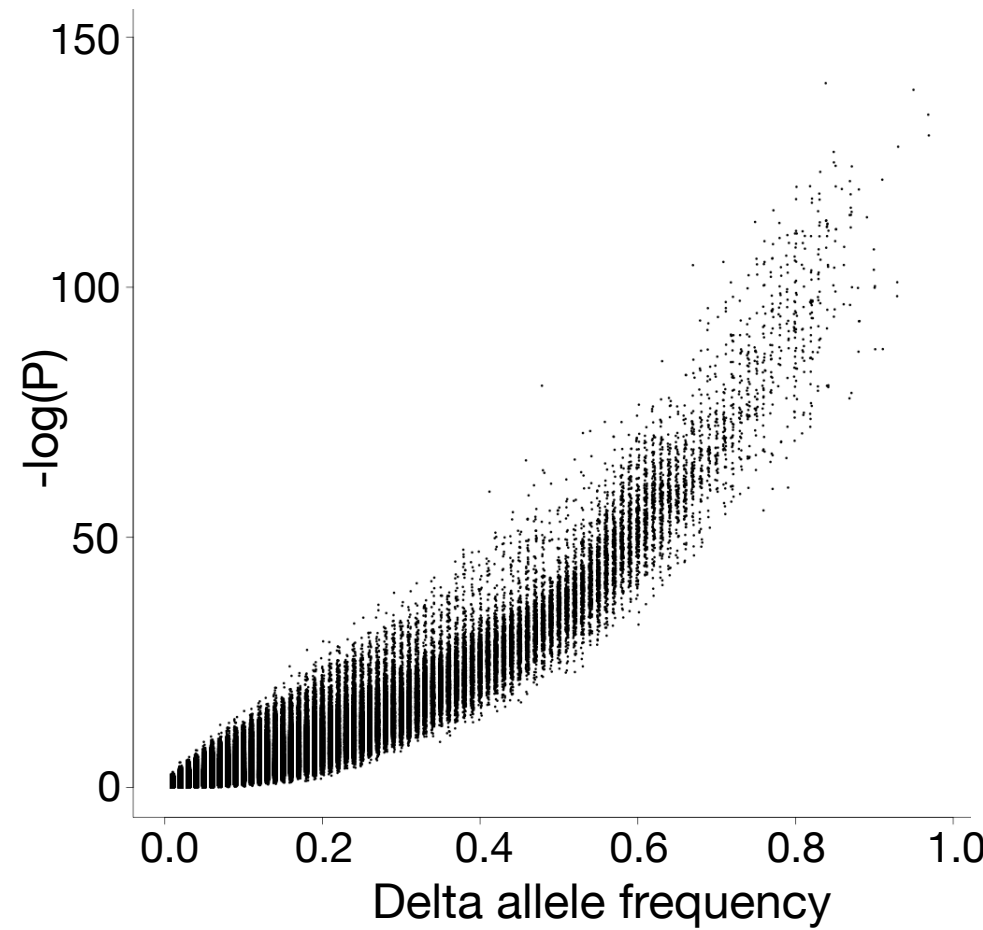

**iii**

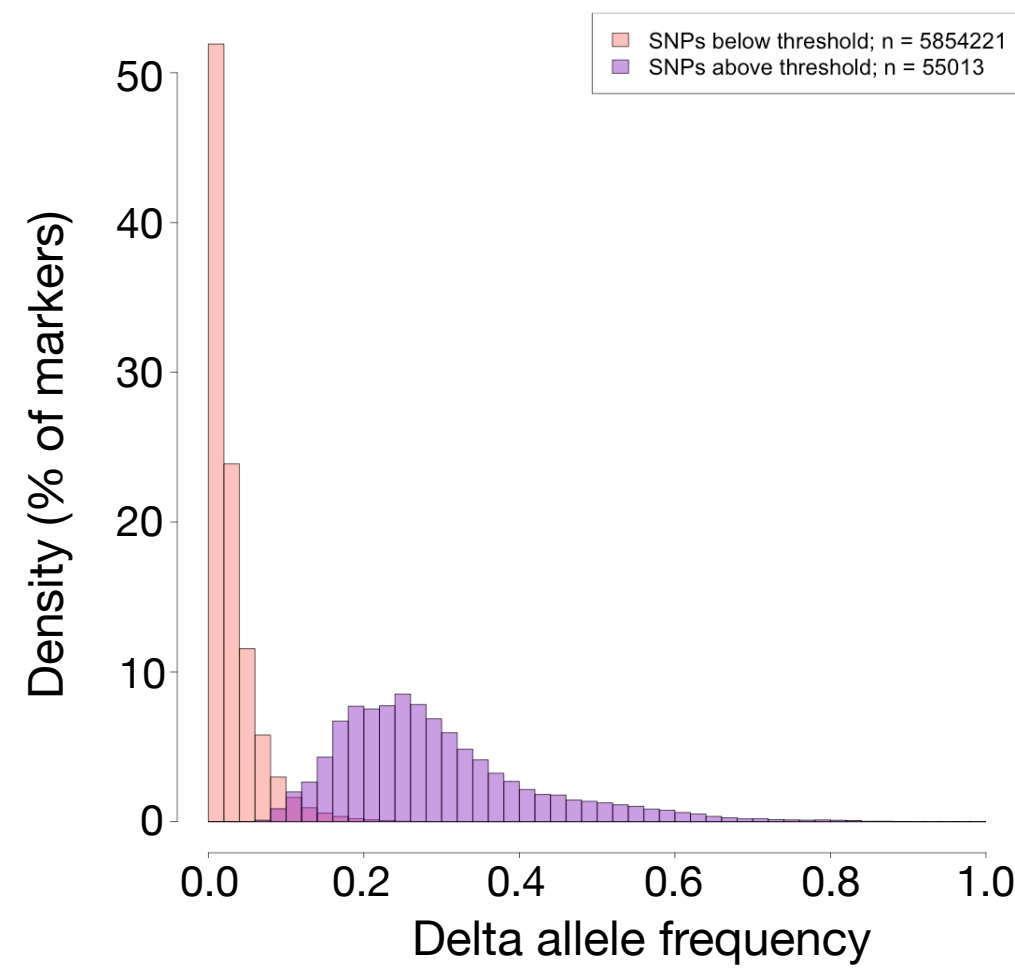

**b**

Baltic Autumn vs Atlantic Autumn

**i**

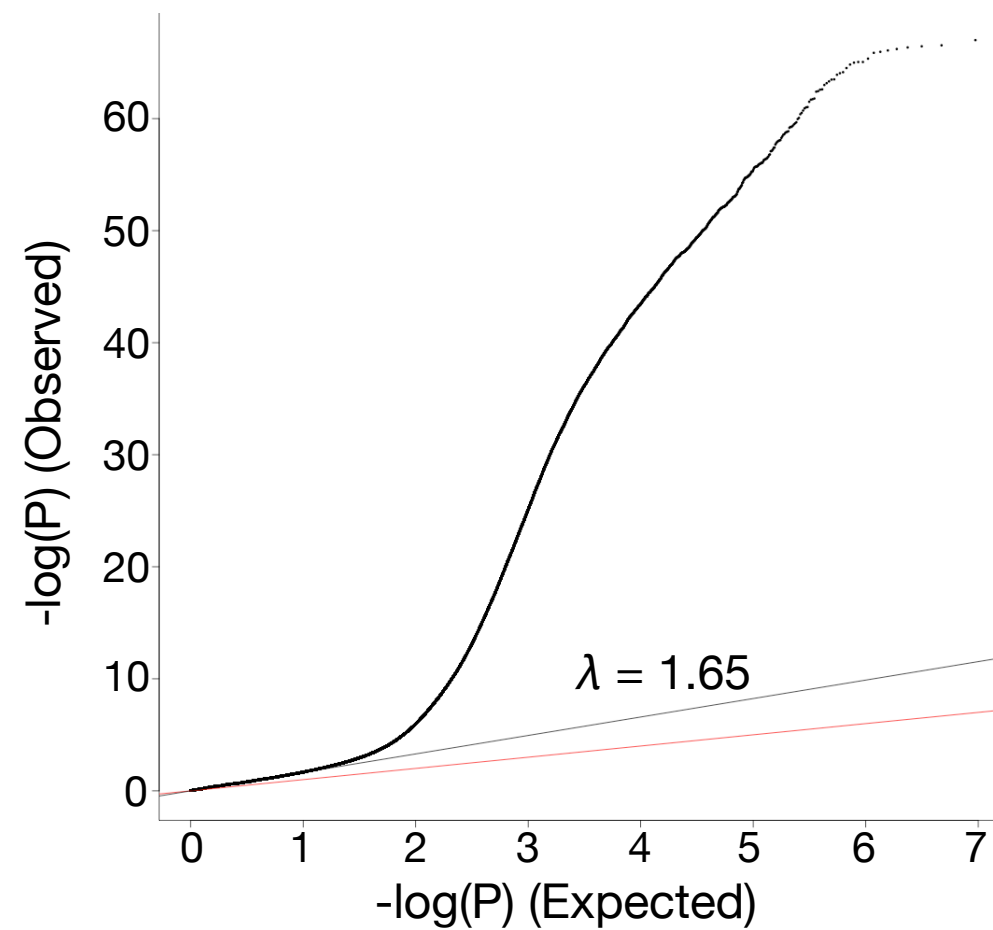

**ii**

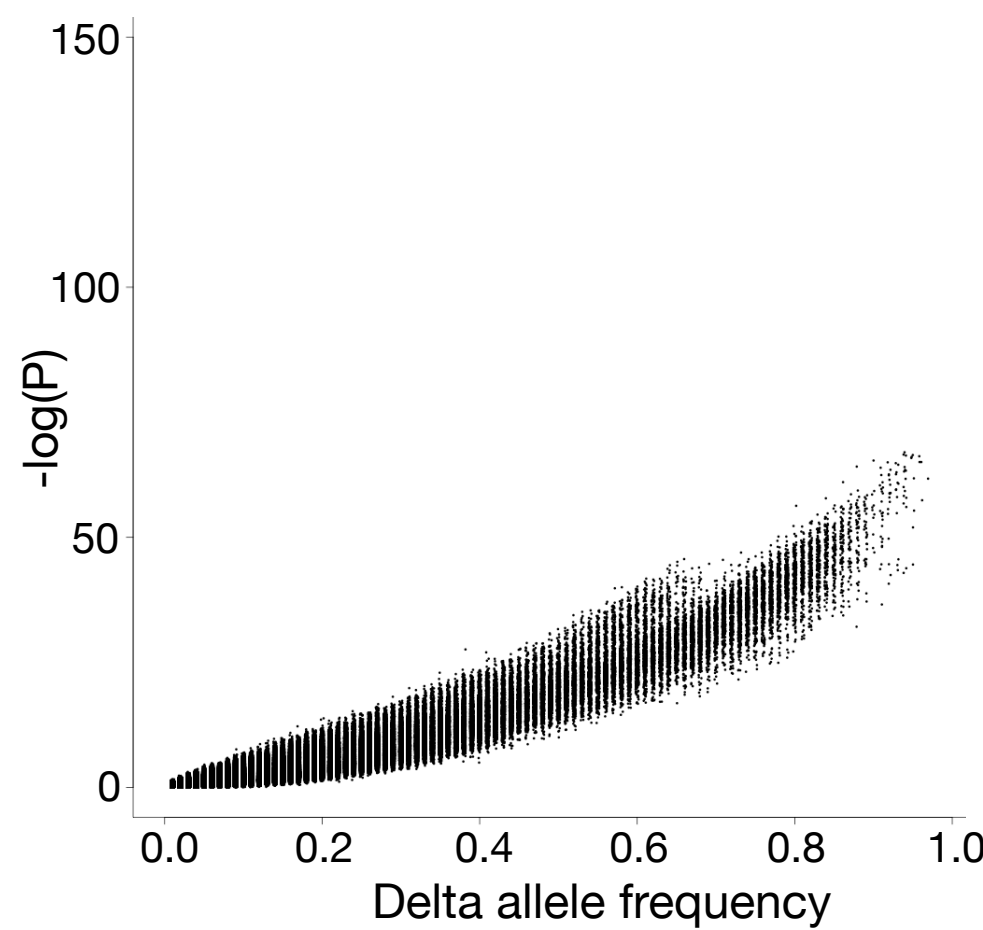

**iii**

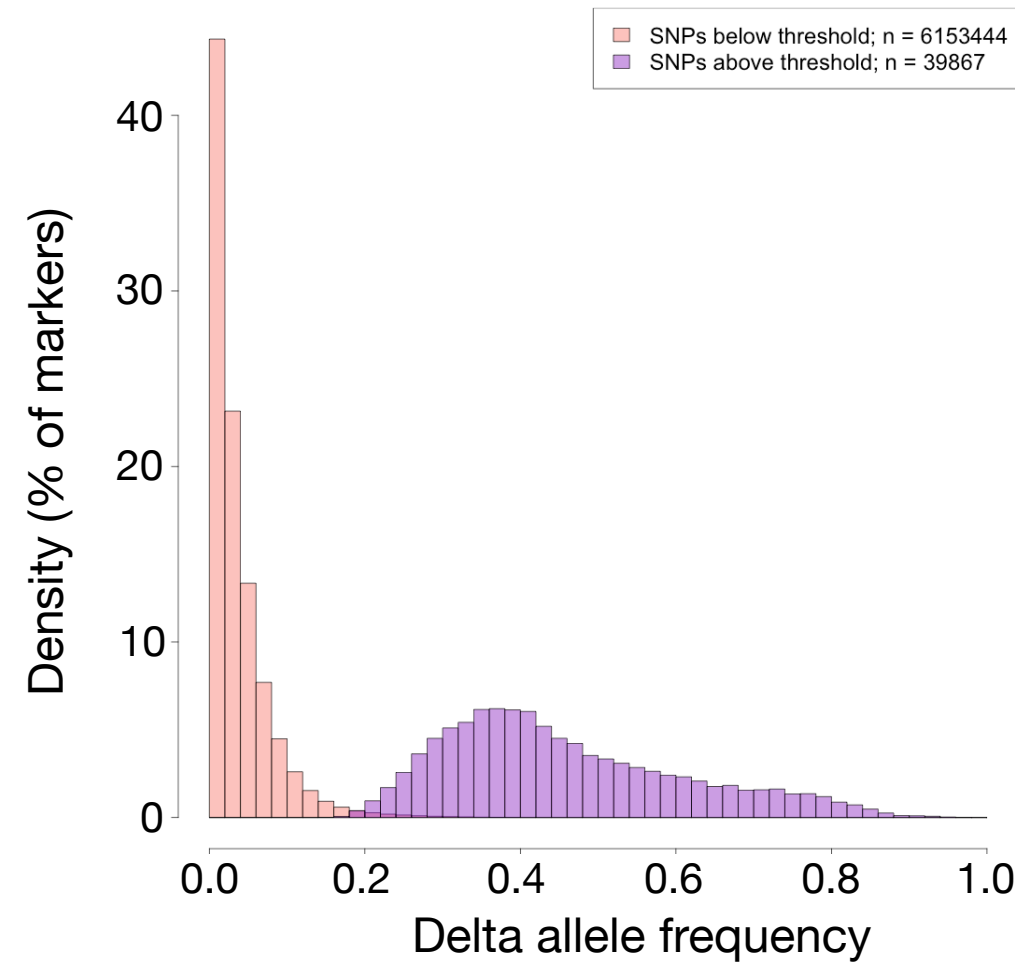

c

Baltic Spring vs Baltic Autumn

i

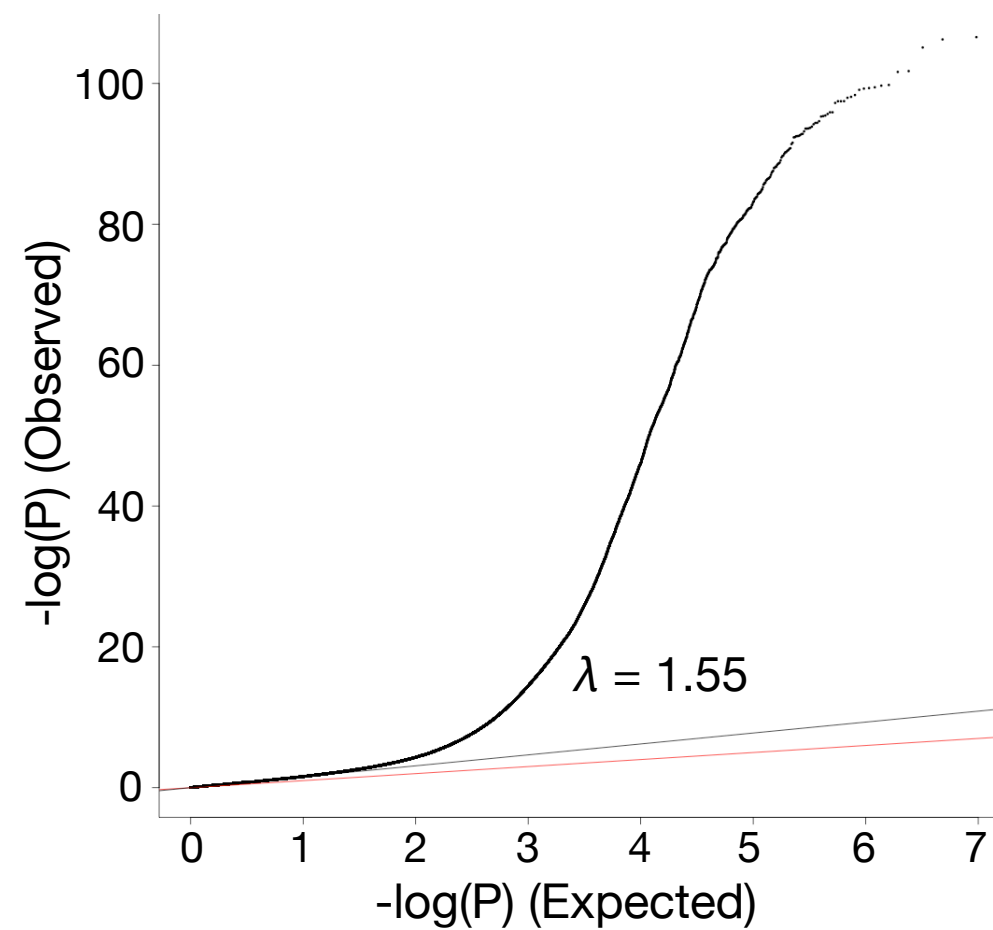

ii

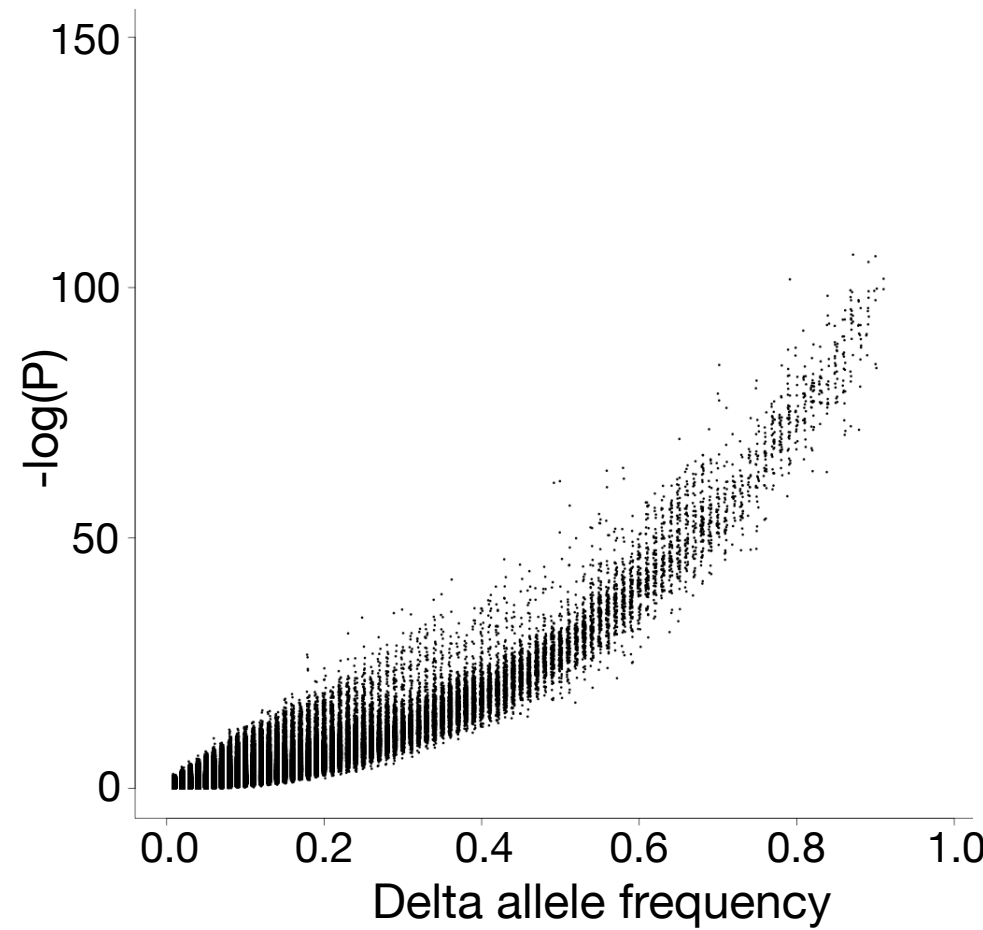

iii

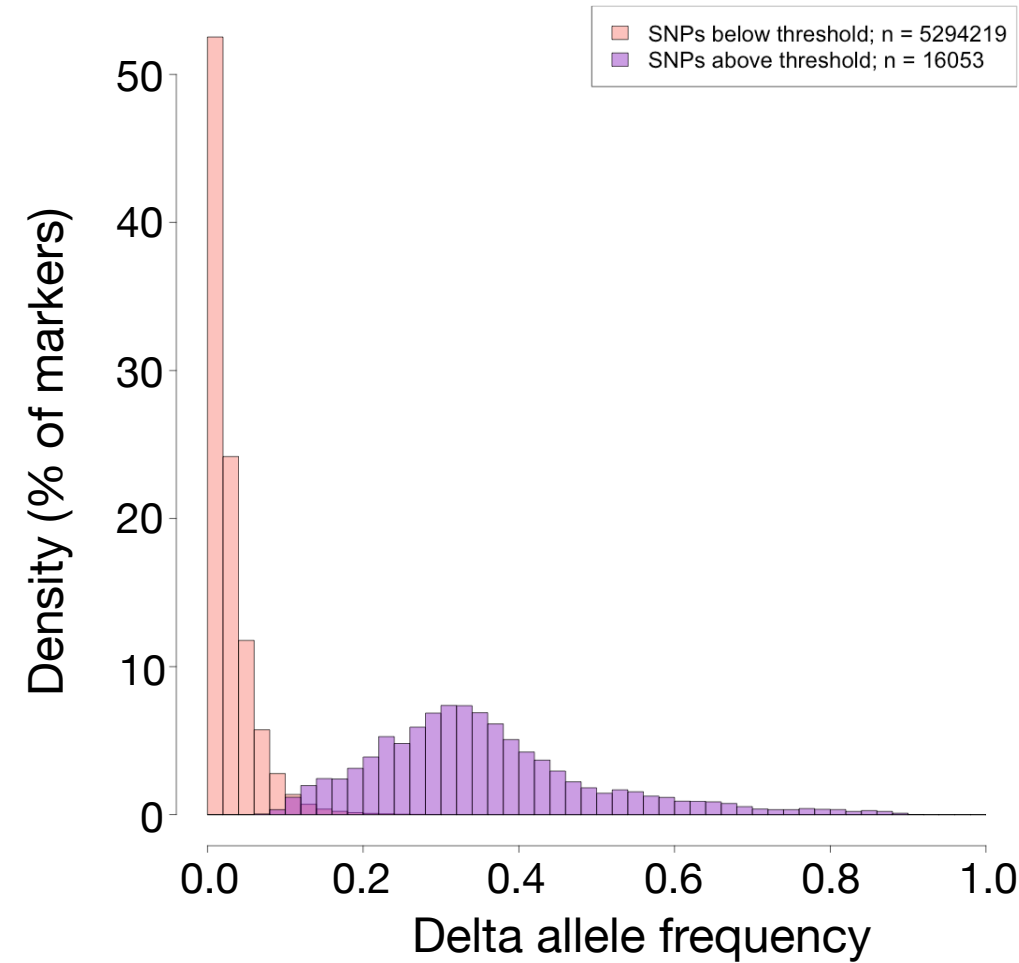

d

Atlantic Spring vs Atlantic Autumn

i

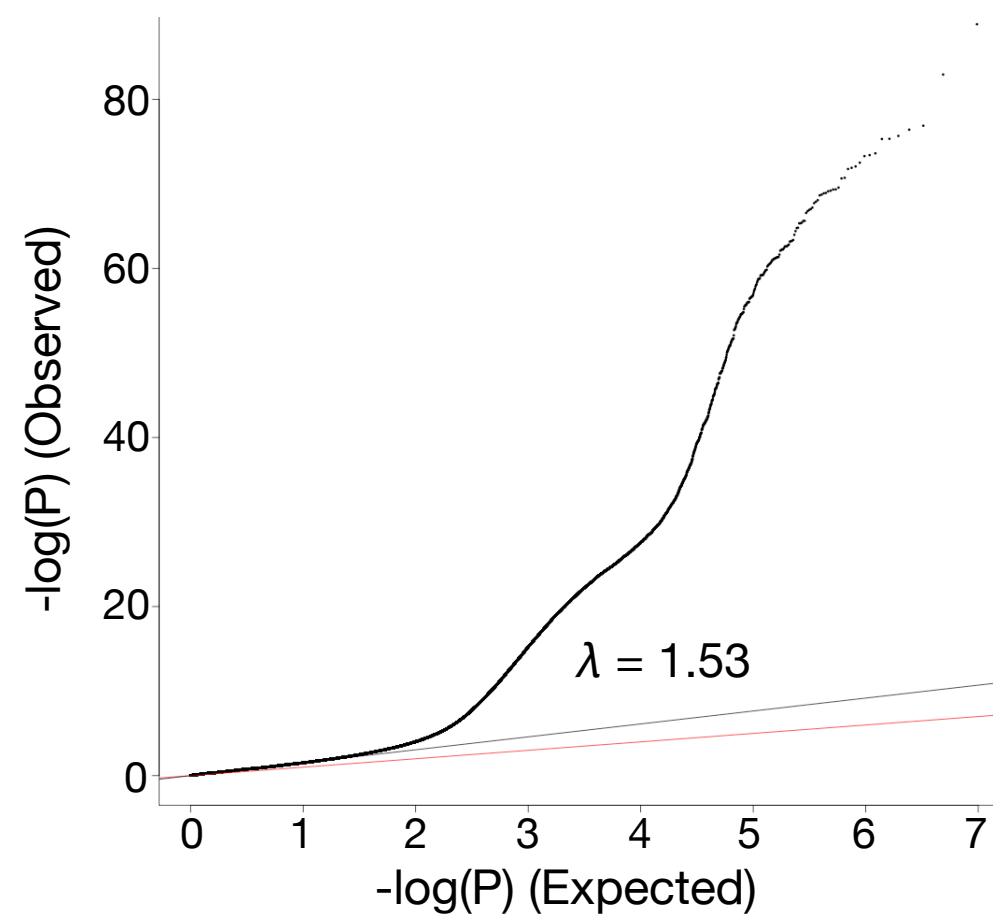

ii

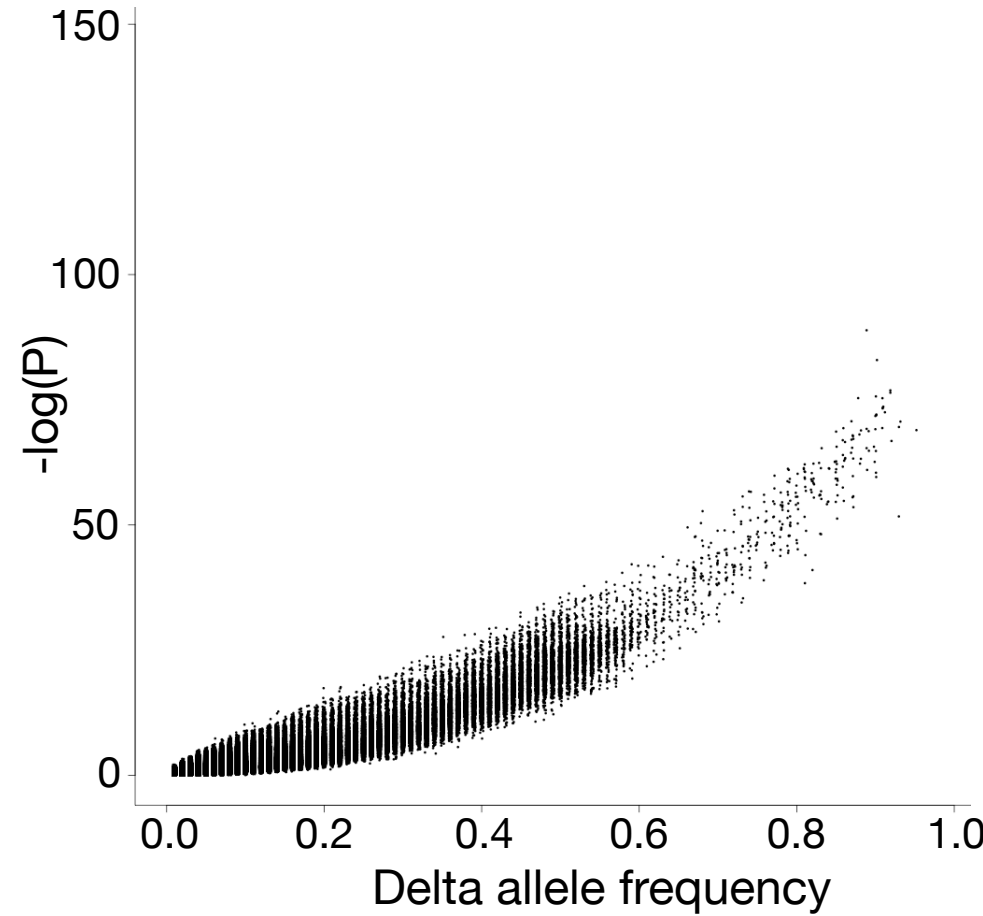

iii

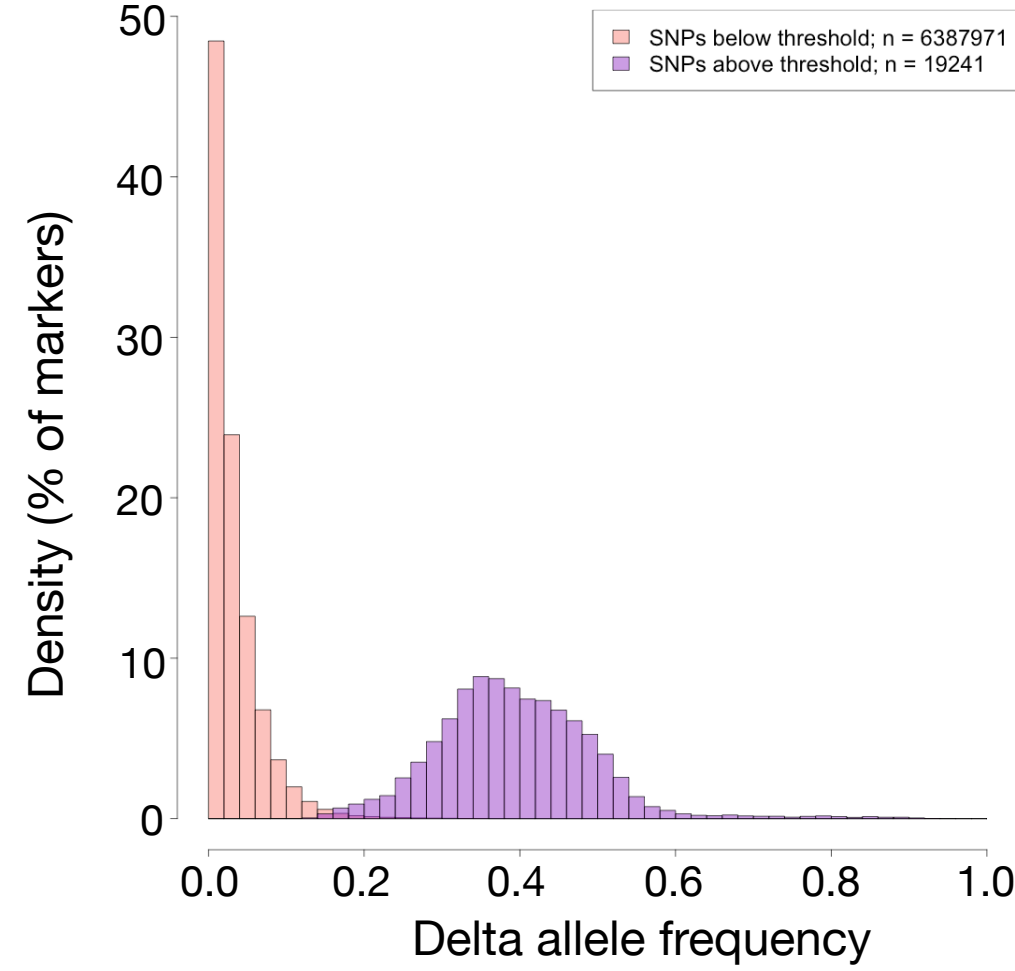

Supplement: supp [file elife-61076-supp-v1.zip]
