# Supplementary material for: Ecological adaptation in Atlantic herring is associated with large shifts in allele frequencies at hundreds of loci
Source: eLife journal article supplement (doi:10.7554/elife.61076), 2020-12-04
Supplement: supp [file elife-61076-supp-v1.zip]

Archive with 24 entries (24 files):
- elife_poa_e61076_Transparent_Reporting_File.docx
- elife_poa_e61076_Figure_1_figure_supplement_1.pdf
- elife_poa_e61076_Figure_2_figure_supplement_1.pdf
- elife_poa_e61076_Figure_2_figure_supplement_2.pdf
- elife_poa_e61076_Figure_2_figure_supplement_3.pdf
- elife_poa_e61076_Figure_3_figure_supplement_1.pdf
- elife_poa_e61076_Figure_3_figure_supplement_2.pdf
- elife_poa_e61076_Figure_3_figure_supplement_3.pdf
- elife_poa_e61076_Figure_3_figure_supplement_4.pdf
- elife_poa_e61076_Figure_4_figure_supplement_1.pdf
- elife_poa_e61076_Figure_4_figure_supplement_2.pdf
- elife_poa_e61076_Figure_4_figure_supplement_3.pdf
- elife_poa_e61076_Figure_4_figure_supplement_4.pdf
- elife_poa_e61076_Figure_4_figure_supplement_5.pdf
- elife_poa_e61076_Figure_5_figure_supplement_1.pdf
- elife_poa_e61076_Figure_5_figure_supplement_2.pdf
- elife_poa_e61076_Figure_5_figure_supplement_3.pdf
- elife_poa_e61076_Supplementary_file_1.xlsx
- elife_poa_e61076_Supplementary_file_2.xlsx
- elife_poa_e61076_Supplementary_file_3.xlsx
- elife_poa_e61076_Supplementary_file_4.xlsx
- elife_poa_e61076_Supplementary_file_5.xlsx
- elife_poa_e61076_Supplementary_file_6.xlsx
- elife_poa_e61076_Supplementary_file_7.xlsx
