# Supplementary material for: Ecological adaptation in Atlantic herring is associated with large shifts in allele frequencies at hundreds of loci
Source: eLife journal article supplement (doi:10.7554/elife.61076), 2020-12-04
Supplement: supp [file elife-61076-supp-v1.zip › elife_poa_e61076_Supplementary_file_2.xlsx]

## Sheet: Table S2
Supplementary File 2. Samples of Atlantic and Pacific herring used for individual sequencing.
Identifier	Sample name	Location	Latitude	Longitude	Region	Spawning season	Sample size	Salinity (ppt)	Date	Reference
i40	H_Fehmarn_Baltic_Autumn	Fehmarn	N54°50′	E11°30′	Baltic Sea	Autumn	3	12	19790923	Lamichhaney et al. 2017
i43	PB7_Gävle_Baltic_Autumn	Gävle	N60°44′	E17°35′	Baltic Sea	Autumn	3	6	20120904	Lamichhaney et al. 2017
i46	PB1_Hästskär_Baltic_Spring	Hästskär	N60°35′	E17°48′	Baltic Sea	Spring	8	6	20130522	Martinez Barrio et al. 2016
i17	AF	Bergen	N60°35′	E05°00′	Northeast Atlantic Ocean	Spring	8	33	20130522	Martinez Barrio et al. 2016
i34	HGS18_CelticSea_Atlantic_AutumnWinter	Celtic Sea	N51° 59'	W6° 51'	Northeast Atlantic Ocean	Winter	3	35	20151201	Present study
i37	HGS10_Downs_EnglishChannel_Winter	Downs	N51° 34'	E1° 90'	Northeast Atlantic Ocean	Winter	3	35	20161212	Present study
i10	HGS17_IsleOfMan_IrishSea_Autumn	Isle of Man	N54° 6'	W4° 37'	Northeast Atlantic Ocean	Autumn	3	35	20150930	Present study
i7	N_NorthSea_Atlantic_Autumn	North Sea	N58°06′	E6°10′	Northeast Atlantic Ocean	Autumn	3	35	19790805	Lamichhaney et al. 2017
i31	HGS15_NSSH_Atlantic_Spring	Norway	N67° 46'	E9°47'	Northeast Atlantic Ocean	Spring	3	35	20170220	Present study
i1	DalBoB_Atlantic_Autumn	Canada(Bonavista Bay)	N48°49′	W53°20′	Northwest Atlantic Ocean	Autumn	2	35	20140625	Lamichhaney et al. 2017
i26	DalFB_Atlantic_Spring	Canada(Fortune Bay)	N47°17′	W55°38′	Northwest Atlantic Ocean	Spring	2	35	20140526	Lamichhaney et al. 2017
i5	DalGeB_Atlantic_Autumn	Canada(German Banks)	N43°16′	W66°18′	Northwest Atlantic Ocean	Autumn	2	35	20140828	Lamichhaney et al. 2017
i30	DalInB_Atlantic_Spring	Canada(Inner Baie Des Chaleurs)	N48°00′	W65°51′	Northwest Atlantic Ocean	Spring	2	35	20140508	Lamichhaney et al. 2017
i3	DalNsF_Atlantic_Autumn	Canada(Northumberland Strait)	N45°44′	W62°36′	Northwest Atlantic Ocean	Autumn	2	35	20140916	Lamichhaney et al. 2017
i28	DalNsS_Atlantic_Spring	Canada(Northumberland Strait)	N46°19′	W64°09′	Northwest Atlantic Ocean	Spring	2	35	20140506	Lamichhaney et al. 2017
i58	Pacific herring	Vancouver, Strait of Georgia	-	-	Pacific Ocean	Spring	6	35	20121124	Lamichhaney et al. 2017
