# Supplementary material for: Ecological adaptation in Atlantic herring is associated with large shifts in allele frequencies at hundreds of loci
Source: eLife journal article supplement (doi:10.7554/elife.61076), 2020-12-04
Supplement: supp [file elife-61076-supp-v1.zip › elife_poa_e61076_Supplementary_file_3.xlsx]

## Sheet: Table S3
Supplementary File 3. Definition of how superpools were formed by pooling population samples of major groups of herring. Sample names correspond to those given in Table S1.
Contrast	Corresponding figure	Superpool1	Superpool2
Baltic vs. Northeast Atlantic herring (Spring spawners)	Figure 3a (Upper)	A_Kalix_Baltic_Spring	HGS15_NSSH_Atlantic_Spring
		B_Vaxholm_Baltic_Spring	PB2_Iceland_Atlantic_Spring
		G_Gamleby_Baltic_Spring	Q_Norway_Atlantic_Atlantic_Spring
		HGS1_Riga_Baltic_Spring	PB9_Kattegat_Atlantic_Spring
		HGS2_Riga_Baltic_Spring	PB10_Skagerrak_Atlantic_Spring
		PB11_Kalmar_Baltic_Spring	O_Hamburgsund_Atlantic_Spring
		PB12_Karlskrona_Baltic_Spring	HGS8_KattegatNorth_Atlantic_Spring
		PB1_HastKar_Baltic_Spring
		PB4_Hudiksvall_Baltic_Spring
		PB5_Galve_Baltic_Spring
		PN3_CentralBaltic_Baltic_Spring
		PB6_Galve_Baltic_Summer
Baltic vs. Northeast Atlantic herring (Autumn spawner)	Figure 3a (Lower)	HGS12_BornholmBasin_Baltic_Autumn	HGS16_Orkney_NorthSea_Autumn
		HGS3_Riga_Baltic_Autumn	HGS17_IsleOfMan_IrishSea_Autumn
		HGS4_Riga_Baltic_Autumn	HGS22_CapeWrath_Atlantic_Autumn
		H_Fehmarn_Baltic_Autumn	N_NorthSea_Atlantic_Autumn
		PB7_Galve_Baltic_Autumn
Spring- vs. Autumn-spawning herring (Baltic Sea)	Figure 3c (Upper)	A_Kalix_Baltic_Spring	HGS12_BornholmBasin_Baltic_Autumn
		B_Vaxholm_Baltic_Spring	HGS3_Riga_Baltic_Autumn
		G_Gamleby_Baltic_Spring	HGS4_Riga_Baltic_Autumn
		HGS1_Riga_Baltic_Spring	H_Fehmarn_Baltic_Autumn
		HGS2_Riga_Baltic_Spring	PB7_Galve_Baltic_Autumn
		PB11_Kalmar_Baltic_Spring
		PB12_Karlskrona_Baltic_Spring
		PB1_HastKar_Baltic_Spring
		PB4_Hudiksvall_Baltic_Spring
		PB5_Galve_Baltic_Spring
		PN3_CentralBaltic_Baltic_Spring
Spring- vs. Autumn-spawning herring (Atlantic Ocean)	Figure 3c (Lower)	HGS15_NSSH_Atlantic_Spring	HGS16_Orkney_NorthSea_Autumn
		PB2_Iceland_Atlantic_Spring	HGS17_IsleOfMan_IrishSea_Autumn
		Q_Norway_Atlantic_Atlantic_Spring	HGS22_CapeWrath_Atlantic_Autumn
		PB9_Kattegat_Atlantic_Spring	N_NorthSea_Atlantic_Autumn
		PB10_Skagerrak_Atlantic_Spring
		O_Hamburgsund_Atlantic_Spring
		HGS8_KattegatNorth_Atlantic_Spring
		HGS20_CapeWrath_Atlantic_Spring
Waters surrounding Ireland and Britain vs. neighboring Northeast Atlantic herring	Figure 4	HGS19_TeelinBay_Atlantic_Winter	HGS15_NSSH_Atlantic_Spring
		HGS10_Downs_EnglishChannel_Winter	HGS9_Greenland_Atlantic_Summer
		HGS18_CelticSea_Atlantic_AutumnWinter	PB2_Iceland_Atlantic_Spring
		HGS17_IsleOfMan_IrishSea_Autumn	Q_Norway_Atlantic_Atlantic_Spring
		HGS16_Orkney_NorthSea_Autumn
		HGS20_CapeWrath_Atlantic_Spring
		HGS22_CapeWrath_Atlantic_Autumn
		HGS21_Hebrides_Atlantic_Mixed
		HGS23_Clyde_Atlantic_Spring
		N_NorthSea_Atlantic_Autumn
Northern Atlantic vs. Ireland, Britain and transition zone	Figure 5	HGS19_TeelinBay_Atlantic_Winter	HGS15_NSSH_Atlantic_Spring
		HGS10_Downs_EnglishChannel_Winter	HGS9_Greenland_Atlantic_Summer
		HGS18_CelticSea_Atlantic_AutumnWinter	PB2_Iceland_Atlantic_Spring
		HGS17_IsleOfMan_IrishSea_Autumn	Q_Norway_Atlantic_Atlantic_Spring
		HGS16_Orkney_NorthSea_Autumn	DalFB_Atlantic_Mixed
		HGS20_CapeWrath_Atlantic_Spring	DalInB_Atlantic_Spring
		HGS22_CapeWrath_Atlantic_Autumn	DalNsS_Atlantic_Spring
		HGS21_Hebrides_Atlantic_Mixed	DalBoB_Atlantic_Autumn
		HGS23_Clyde_Atlantic_Spring	DalGeB_Atlantic_Autumn
		N_NorthSea_Atlantic_Autumn	DalNsF_Atlantic_Autumn
		HGS71_Rugen_Baltic_Spring
		HGS72_Rugen_Baltic_Spring
		TysklandS18_Germany_Baltic
		HGS6_Schlei_Baltic_Spring
		HGS5_Schlei_Baltic_Autumn
		HGS11_RingkobingFjord_NorthSea_Spring
		J_Traslovslage_Baltic_Spring
		PB9_Kattegat_Atlantic_Spring
		O_Hamburgsund_Atlantic_Spring
		HGS8_KattegatNorth_Atlantic_Spring
		PB10_Skagerrak_Atlantic_Spring
