# Supplementary material for: Ecological adaptation in Atlantic herring is associated with large shifts in allele frequencies at hundreds of loci
Source: eLife journal article supplement (doi:10.7554/elife.61076), 2020-12-04
Supplement: supp [file elife-61076-supp-v1.zip › elife_poa_e61076_Supplementary_file_4.xlsx]

## Sheet: salinity.snp
Supplementary File 4. List of SNPs showing strong genetic differentiation between superpools of Atlantic and Baltic herring. The criteria for inclusion were raw P<10-30 for both comparisons (among spring-spawners and among autumn-spawners) or raw P<10-50 for a single comparison. These are the SNPs colored in red or black in Figure 3-figure supplement 1. Raw P-values are given in columns E and G a…
CHR	POS	REF	ALT	log10P.Spring (raw)	log10P.Spring (adj)	log10P.Autumn (raw)	log10P.Autumn (adj)	SNP type	associated.gene.name	associated.gene.id
1	12508333	T	A	34.34	17.8576	30.5	18.5105	upstream_gene_variant	lncRNA	ENSCHAG00000010664
1	12510753	G	A	47.77	24.8415	39.79	24.1487	downstream_gene_variant	lncRNA	ENSCHAG00000010664
1	12510754	C	T	47.61	24.7583	39.84	24.179	downstream_gene_variant	lncRNA	ENSCHAG00000010664
1	13537685	G	A	57.76	30.0366	12.67	7.68946	intergenic_region	unannotated gene-PNMT	ENSCHAG00000016662-ENSCHAG00000016666
1	13545324	G	A	50.11	26.0584	11.42	6.93083	intergenic_region	unannotated gene-PNMT	ENSCHAG00000016662-ENSCHAG00000016666
1	17781481	A	T	51.93	27.0048	8.89	5.39536	downstream_gene_variant	cyth1a	ENSCHAG00000011100
1	17793895	C	A	60.4	31.4094	22.84	13.8617	downstream_gene_variant	prkcab	ENSCHAG00000012896
1	17809416	A	G	53.82	27.9877	24.1	14.6264	intron_variant	prkcab	ENSCHAG00000012896
1	17820418	T	C	54.01	28.0865	14.11	8.56339	intron_variant	prkcab	ENSCHAG00000012896
1	17834857	G	A	51.41	26.7344	19.88	12.0652	intron_variant	prkcab	ENSCHAG00000012896
1	17834858	G	C	51.41	26.7344	20.13	12.2169	intron_variant	prkcab	ENSCHAG00000012896
1	17846192	T	C	119.64	62.2156	47.61	28.8946	intron_variant	prkcab	ENSCHAG00000012896
1	17847640	A	T	113.99	59.2775	51.33	31.1523	intron_variant	prkcab	ENSCHAG00000012896
1	17853464	C	T	74.29	38.6325	37.36	22.6739	intron_variant	prkcab	ENSCHAG00000012896
1	17853574	C	T	86.69	45.0808	40.47	24.5613	intron_variant	prkcab	ENSCHAG00000012896
1	17857519	G	A	121.21	63.032	46.48	28.2088	intron_variant	prkcab	ENSCHAG00000012896
1	17861464	A	T	78.1	40.6138	33.57	20.3737	intron_variant	prkcab	ENSCHAG00000012896
1	17866414	A	G	119.55	62.1688	48.03	29.1495	intron_variant	prkcab	ENSCHAG00000012896
1	17897796	G	A	79.77	41.4823	37.72	22.8924	intron_variant	prkcab	ENSCHAG00000012896
1	17897797	C	A	81	42.1219	37.2	22.5768	intron_variant	prkcab	ENSCHAG00000012896
1	17898435	T	A	96.04	49.9431	44.57	27.0496	intron_variant	prkcab	ENSCHAG00000012896
1	17900334	G	A	89.91	46.7553	42.7	25.9147	intron_variant	prkcab	ENSCHAG00000012896
1	17909301	A	G	93.15	48.4402	42.22	25.6234	intron_variant	prkcab	ENSCHAG00000012896
1	17909937	G	T	86.36	44.9092	41.94	25.4535	upstream_gene_variant	cep112	ENSCHAG00000013396
1	17913146	C	T	104.45	54.3165	41.58	25.235	upstream_gene_variant	prkcab	ENSCHAG00000012896
1	17916765	T	C	61.33	31.893	20.42	12.3929	upstream_gene_variant	prkcab	ENSCHAG00000012896
1	17921388	T	A	71.65	37.2597	39.14	23.7542	intron_variant	cep112	ENSCHAG00000013396
1	17924809	C	A	97.4	50.6503	44.1	26.7644	intron_variant	cep112	ENSCHAG00000013396
1	17924810	A	T	96.41	50.1355	42.98	26.0847	intron_variant	cep112	ENSCHAG00000013396
1	17925173	G	T	65.21	33.9107	18.64	11.3127	intron_variant	cep112	ENSCHAG00000013396
1	17932176	T	C	86.11	44.7792	36	21.8485	intron_variant	cep112	ENSCHAG00000013396
1	17932698	C	A	75.39	39.2046	34.16	20.7318	intron_variant	cep112	ENSCHAG00000013396
1	17937148	C	G	69.81	36.3028	29.62	17.9765	intron_variant	cep112	ENSCHAG00000013396
1	17940421	C	G	81.28	42.2675	33.88	20.5619	intron_variant	cep112	ENSCHAG00000013396
1	17942288	G	A	60.79	31.6122	27.97	16.9751	intron_variant	cep112	ENSCHAG00000013396
1	17944657	C	T	80.62	41.9243	35.99	21.8424	intron_variant	cep112	ENSCHAG00000013396
1	17960060	G	A	53.4	27.7693	27.26	16.5442	intron_variant	cep112	ENSCHAG00000013396
1	17960065	T	A	51.36	26.7084	29.17	17.7033	intron_variant	cep112	ENSCHAG00000013396
1	17964546	G	A	65.11	33.8587	20.52	12.4536	intron_variant	cep112	ENSCHAG00000013396
1	17964953	A	G	70.03	36.4172	32.86	19.9428	intron_variant	cep112	ENSCHAG00000013396
1	17969614	C	A	77.95	40.5358	35.47	21.5268	intron_variant	cep112	ENSCHAG00000013396
1	17972910	G	A	76.65	39.8598	34.03	20.6529	intron_variant	cep112	ENSCHAG00000013396
1	17977110	C	A	74.72	38.8562	33.7	20.4526	intron_variant	cep112	ENSCHAG00000013396
1	17977461	A	G	57.06	29.6725	19.08	11.5797	intron_variant	cep112	ENSCHAG00000013396
1	17977567	G	T	74.81	38.903	38.94	23.6328	intron_variant	cep112	ENSCHAG00000013396
1	17980956	A	T	91.88	47.7798	37.17	22.5586	intron_variant	cep112	ENSCHAG00000013396
1	17981699	C	T	54.7	28.4453	21.31	12.9331	intron_variant	cep112	ENSCHAG00000013396
1	17983425	G	T	75.06	39.033	34.19	20.75	intron_variant	cep112	ENSCHAG00000013396
1	17987843	A	C	73.49	38.2165	31.34	19.0203	intron_variant	cep112	ENSCHAG00000013396
1	17991187	C	A	68.22	35.476	31.13	18.8929	intron_variant	cep112	ENSCHAG00000013396
2	4982631	A	G	52.09	27.088	32.37	19.6454	upstream_gene_variant	lncRNA	ENSCHAG00000000578
2	4982707	C	T	41.54	21.6018	30.77	18.6744	upstream_gene_variant	lncRNA	ENSCHAG00000000578
2	4982718	T	C	42.23	21.9606	30.96	18.7897	upstream_gene_variant	lncRNA	ENSCHAG00000000578
2	5055980	C	T	72.47	37.6861	29.91	18.1525	intron_variant	lncRNA	ENSCHAG00000000885
2	5056012	T	C	57.95	30.1354	17.29	10.4933	intron_variant	lncRNA	ENSCHAG00000000885
2	5056042	C	A	93.19	48.461	32.44	19.6879	intron_variant	lncRNA	ENSCHAG00000000885
2	5056044	T	C	98.21	51.0715	45.47	27.5959	intron_variant	lncRNA	ENSCHAG00000000885
2	5056046	G	T	93.23	48.4818	32.32	19.6151	intron_variant	lncRNA	ENSCHAG00000000885
2	5056113	C	T	87.63	45.5697	39.43	23.9302	intron_variant	lncRNA	ENSCHAG00000000885
2	5056223	G	A	58.21	30.2706	19.46	11.8103	intron_variant	lncRNA	ENSCHAG00000000885
2	5056526	T	A	78.73	40.9415	31.42	19.0689	intron_variant	lncRNA	ENSCHAG00000000885
2	5056609	T	A	82.79	43.0527	35.76	21.7028	intron_variant	lncRNA	ENSCHAG00000000885
2	5056631	G	C	87.28	45.3877	37.79	22.9348	intron_variant	lncRNA	ENSCHAG00000000885
2	5056648	T	A	66.41	34.5348	28.18	17.1025	intron_variant	lncRNA	ENSCHAG00000000885
2	5056649	C	A	82.45	42.8759	34.05	20.665	intron_variant	lncRNA	ENSCHAG00000000885
2	5056737	C	G	85.9	44.67	35.26	21.3994	intron_variant	lncRNA	ENSCHAG00000000885
2	5056780	T	A	84.34	43.8588	35.14	21.3266	intron_variant	lncRNA	ENSCHAG00000000885
2	5056832	A	G	92.2	47.9462	37.5	22.7588	intron_variant	lncRNA	ENSCHAG00000000885
2	5056842	T	A	78.86	41.0091	37.61	22.8256	intron_variant	lncRNA	ENSCHAG00000000885
2	5056847	T	G	77.79	40.4526	37.16	22.5525	intron_variant	lncRNA	ENSCHAG00000000885
2	5056848	T	A	53.64	27.8941	22.87	13.8799	intron_variant	lncRNA	ENSCHAG00000000885
2	5056849	C	A	74.83	38.9134	36.58	22.2005	intron_variant	lncRNA	ENSCHAG00000000885
2	5056860	C	A	76.24	39.6466	36.29	22.0245	intron_variant	lncRNA	ENSCHAG00000000885
2	5056914	A	T	51.03	26.5368	27.75	16.8415	intron_variant	lncRNA	ENSCHAG00000000885
2	5056928	C	T	74.47	38.7262	32.5	19.7243	intron_variant	lncRNA	ENSCHAG00000000885
2	5057040	A	G	56.77	29.5217	27.6	16.7505	intron_variant	lncRNA	ENSCHAG00000000885
2	5057068	G	A	91.77	47.7226	38.26	23.2201	intron_variant	lncRNA	ENSCHAG00000000885
2	5057090	A	G	100	52.0024	43.63	26.4792	intron_variant	lncRNA	ENSCHAG00000000885
2	5058071	T	G	96.59	50.2291	40.83	24.7798	intron_variant	lncRNA	ENSCHAG00000000885
2	5058082	T	G	61.89	32.1843	27.15	16.4774	intron_variant	lncRNA	ENSCHAG00000000885
2	5058088	G	C	99.9	51.9503	40.21	24.4036	intron_variant	lncRNA	ENSCHAG00000000885
2	5058089	T	C	100.22	52.1168	39.54	23.9969	intron_variant	lncRNA	ENSCHAG00000000885
2	5058121	G	T	103.49	53.8172	41.42	25.1379	intron_variant	lncRNA	ENSCHAG00000000885
2	5058130	C	A	67.18	34.9352	23.01	13.9648	intron_variant	lncRNA	ENSCHAG00000000885
2	5058136	T	G	99.86	51.9295	42.32	25.6841	intron_variant	lncRNA	ENSCHAG00000000885
2	5058152	G	C	96.46	50.1615	40.7	24.7009	intron_variant	lncRNA	ENSCHAG00000000885
2	5058191	C	A	55.43	28.8249	25.67	15.5792	intron_variant	lncRNA	ENSCHAG00000000885
2	5058217	G	T	101	52.5224	43.44	26.3638	intron_variant	lncRNA	ENSCHAG00000000885
2	5058257	G	A	70.54	36.6825	30.38	18.4377	intron_variant	lncRNA	ENSCHAG00000000885
2	5058269	G	A	80.21	41.7111	35.38	21.4722	intron_variant	lncRNA	ENSCHAG00000000885
2	5058315	G	A	80.71	41.9711	37.31	22.6435	intron_variant	lncRNA	ENSCHAG00000000885
2	5058325	T	C	58.85	30.6034	28.23	17.1329	intron_variant	lncRNA	ENSCHAG00000000885
2	5058737	T	C	95.35	49.5842	44.9	27.2499	intron_variant	lncRNA	ENSCHAG00000000885
2	5059166	A	G	82.45	42.8759	39.3	23.8513	intron_variant	lncRNA	ENSCHAG00000000885
2	5062138	C	T	80.31	41.7631	49.53	30.0599	intron_variant	lncRNA	ENSCHAG00000000885
2	5062294	G	T	51.41	26.7344	22.65	13.7463	intron_variant	lncRNA	ENSCHAG00000000885
2	5062295	A	C	73.53	38.2373	28.29	17.1693	intron_variant	lncRNA	ENSCHAG00000000885
2	5076861	A	T	35.91	18.674	32.88	19.955	intron_variant	lncRNA	ENSCHAG00000000885
2	5079027	T	G	61.45	31.9554	NA	#VALUE!	intron_variant	lncRNA	ENSCHAG00000000885
2	5079063	A	G	50.6	26.3132	NA	#VALUE!	intron_variant	lncRNA	ENSCHAG00000000885
2	5079232	C	T	56.96	29.6205	NA	#VALUE!	intron_variant	lncRNA	ENSCHAG00000000885
2	5079233	G	T	56.18	29.2149	NA	#VALUE!	intron_variant	lncRNA	ENSCHAG00000000885
2	5079318	C	G	57.5	29.9014	NA	#VALUE!	intron_variant	lncRNA	ENSCHAG00000000885
2	5087002	T	G	54.92	28.5597	34.93	21.1991	upstream_gene_variant	lncRNA	ENSCHAG00000000885
2	5113423	T	G	56.97	29.6257	23.85	14.4746	intron_variant	lncRNA	ENSCHAG00000000885
2	5123228	T	A	55.09	28.6481	21.39	12.9816	downstream_gene_variant	lncRNA	ENSCHAG00000000904
2	5123230	C	A	54.72	28.4557	20.75	12.5932	downstream_gene_variant	lncRNA	ENSCHAG00000000904
2	5123238	C	A	51.97	27.0256	21.77	13.2123	downstream_gene_variant	lncRNA	ENSCHAG00000000904
2	5127517	C	T	60.8	31.6174	33.64	20.4162	intron_variant	lncRNA	ENSCHAG00000000885
2	5132076	A	C	51.38	26.7188	25.02	15.1847	intron_variant	lncRNA	ENSCHAG00000000904
2	5133316	T	G	65.29	33.9523	30.42	18.462	upstream_gene_variant	lncRNA	ENSCHAG00000000885
2	5133482	T	G	57.99	30.1562	29.44	17.8672	upstream_gene_variant	lncRNA	ENSCHAG00000000885
2	5134967	T	A	53.39	27.7641	27.59	16.7444	upstream_gene_variant	lncRNA	ENSCHAG00000000885
2	5136916	A	G	66.48	34.5712	31.19	18.9293	upstream_gene_variant	lncRNA	ENSCHAG00000000885
2	5138581	C	T	69.18	35.9752	27.14	16.4713	intron_variant	lncRNA	ENSCHAG00000000904
2	5138613	G	A	66.72	34.696	29.98	18.1949	intron_variant	lncRNA	ENSCHAG00000000904
2	5157255	T	G	60	31.2014	36.2	21.9699	synonymous_variant	unannotated gene	ENSCHAG00000000999
2	5158175	T	C	57.06	29.6725	30.13	18.286	upstream_gene_variant	unannotated gene	ENSCHAG00000000999
2	5158186	A	G	62.76	32.6367	35.77	21.7089	upstream_gene_variant	unannotated gene	ENSCHAG00000000999
2	5158399	A	G	38.53	20.0365	30.96	18.7897	upstream_gene_variant	unannotated gene	ENSCHAG00000000999
2	5160303	G	T	56.19	29.2201	NA	#VALUE!	upstream_gene_variant	unannotated gene	ENSCHAG00000000999
2	5160309	G	T	77.38	40.2394	NA	#VALUE!	upstream_gene_variant	unannotated gene	ENSCHAG00000000999
2	5160580	G	A	77.64	40.3746	NA	#VALUE!	upstream_gene_variant	unannotated gene	ENSCHAG00000000999
2	5160703	C	A	76.56	39.813	43.69	26.5156	upstream_gene_variant	unannotated gene	ENSCHAG00000000999
2	5162626	A	G	69.05	35.9076	37.41	22.7042	intergenic_region	unannotated gene-lrrc8c	ENSCHAG00000000999-ENSCHAG00000001029
2	5162836	C	T	88.27	45.9025	48.25	29.283	intergenic_region	unannotated gene-lrrc8c	ENSCHAG00000000999-ENSCHAG00000001029
2	5162840	G	T	78.03	40.5774	40.05	24.3064	intergenic_region	unannotated gene-lrrc8c	ENSCHAG00000000999-ENSCHAG00000001029
2	5162941	G	T	55.96	29.1005	44.7	27.1285	downstream_gene_variant	lrrc8c	ENSCHAG00000001029
2	5164073	A	G	54.11	28.1385	31.3	18.996	downstream_gene_variant	lrrc8c	ENSCHAG00000001029
2	5164074	G	A	43.42	22.5794	31	18.814	downstream_gene_variant	lrrc8c	ENSCHAG00000001029
2	5164085	A	G	67.65	35.1796	32.84	19.9307	downstream_gene_variant	lrrc8c	ENSCHAG00000001029
2	5164090	G	T	70.29	36.5525	36.41	22.0973	downstream_gene_variant	lrrc8c	ENSCHAG00000001029
2	5164093	C	T	67.58	35.1432	38.06	23.0987	downstream_gene_variant	lrrc8c	ENSCHAG00000001029
2	5164108	T	A	53.58	27.8629	34.91	21.187	downstream_gene_variant	lrrc8c	ENSCHAG00000001029
2	5165487	T	A	88.24	45.8869	39.55	24.003	downstream_gene_variant	lrrc8c	ENSCHAG00000001029
2	5165502	A	C	85.09	44.2488	40.2	24.3975	downstream_gene_variant	lrrc8c	ENSCHAG00000001029
2	5165755	T	C	76.58	39.8234	39.89	24.2093	downstream_gene_variant	lrrc8c	ENSCHAG00000001029
2	5165765	G	C	53.89	28.0241	31.76	19.2752	downstream_gene_variant	lrrc8c	ENSCHAG00000001029
2	5166189	A	G	66.43	34.5452	27.71	16.8173	downstream_gene_variant	lrrc8c	ENSCHAG00000001029
2	5166212	C	T	73.25	38.0917	25.07	15.215	downstream_gene_variant	lrrc8c	ENSCHAG00000001029
2	5166274	A	G	55.24	28.7261	23.95	14.5353	downstream_gene_variant	lrrc8c	ENSCHAG00000001029
2	5166534	G	A	84.72	44.0564	46.36	28.136	downstream_gene_variant	lrrc8c	ENSCHAG00000001029
2	5166745	C	A	66.28	34.4672	34.28	20.8046	downstream_gene_variant	lrrc8c	ENSCHAG00000001029
2	5166764	A	T	57.64	29.9742	29.64	17.9886	downstream_gene_variant	lrrc8c	ENSCHAG00000001029
2	5166769	C	T	57.19	29.7401	33.45	20.3009	downstream_gene_variant	lrrc8c	ENSCHAG00000001029
2	5166843	A	T	65.13	33.8691	33.39	20.2645	downstream_gene_variant	lrrc8c	ENSCHAG00000001029
2	5166846	A	G	50.09	26.048	25.64	15.561	downstream_gene_variant	lrrc8c	ENSCHAG00000001029
2	5166904	G	C	107.56	55.9337	55.64	33.7681	downstream_gene_variant	lrrc8c	ENSCHAG00000001029
2	5166929	A	G	85.53	44.4776	35.79	21.721	downstream_gene_variant	lrrc8c	ENSCHAG00000001029
2	5167087	T	C	83.38	43.3596	37.56	22.7953	downstream_gene_variant	lrrc8c	ENSCHAG00000001029
2	5167089	G	T	81.92	42.6003	37.25	22.6071	downstream_gene_variant	lrrc8c	ENSCHAG00000001029
2	5167191	C	T	82.46	42.8811	36.04	21.8728	downstream_gene_variant	lrrc8c	ENSCHAG00000001029
2	5167217	G	T	70.85	36.8437	31.14	18.8989	downstream_gene_variant	lrrc8c	ENSCHAG00000001029
2	5167228	C	T	55.34	28.7781	20.76	12.5993	downstream_gene_variant	lrrc8c	ENSCHAG00000001029
2	5167281	C	T	94.04	48.903	42.91	26.0422	downstream_gene_variant	lrrc8c	ENSCHAG00000001029
2	5167282	A	G	121.51	63.1881	58.02	35.2125	downstream_gene_variant	lrrc8c	ENSCHAG00000001029
2	5167301	C	A	128.09	66.6098	62.45	37.9011	downstream_gene_variant	lrrc8c	ENSCHAG00000001029
2	5167424	G	A	70.14	36.4744	31.51	19.1235	downstream_gene_variant	lrrc8c	ENSCHAG00000001029
2	5168019	C	G	73.4	38.1697	44.01	26.7098	synonymous_variant	lrrc8c	ENSCHAG00000001029
2	5168133	G	A	104.09	54.1292	40.62	24.6524	synonymous_variant	lrrc8c	ENSCHAG00000001029
2	5168330	A	G	78.84	40.9987	27.68	16.7991	synonymous_variant	lrrc8c	ENSCHAG00000001029
2	5168708	C	T	130.35	67.7851	61.79	37.5005	missense_variant	lrrc8c	ENSCHAG00000001029
2	5168847	T	C	73.46	38.2009	34.57	20.9806	synonymous_variant	lrrc8c	ENSCHAG00000001029
2	5168906	C	T	61.79	32.1323	16.49	10.0078	missense_variant	lrrc8c	ENSCHAG00000001029
2	5169063	C	A	63.98	33.2711	33.54	20.3555	synonymous_variant	lrrc8c	ENSCHAG00000001029
2	5169147	A	G	63.7	33.1255	26.94	16.35	synonymous_variant	lrrc8c	ENSCHAG00000001029
2	5169276	A	T	57.5	29.9014	27.27	16.5502	synonymous_variant	lrrc8c	ENSCHAG00000001029
2	5169285	G	A	134.5	69.9432	59.58	36.1593	synonymous_variant	lrrc8c	ENSCHAG00000001029
2	5169499	G	A	139.47	72.5277	61.69	37.4398	missense_variant	lrrc8c	ENSCHAG00000001029
2	5169987	C	T	94.68	49.2358	48.75	29.5865	synonymous_variant	lrrc8c	ENSCHAG00000001029
2	5170505	C	T	98.03	50.9779	54.92	33.3311	upstream_gene_variant	ankzf1	ENSCHAG00000001064
2	5170753	G	C	51.83	26.9528	30.7	18.6319	upstream_gene_variant	ankzf1	ENSCHAG00000001064
2	5171549	C	A	97.34	50.6191	53.84	32.6756	upstream_gene_variant	ankzf1	ENSCHAG00000001064
2	5171558	C	A	99.11	51.5395	53.04	32.1901	upstream_gene_variant	ankzf1	ENSCHAG00000001064
2	5171617	T	G	58.98	30.671	21.89	13.2851	upstream_gene_variant	ankzf1	ENSCHAG00000001064
2	5171619	C	A	58.11	30.2186	21.02	12.7571	upstream_gene_variant	ankzf1	ENSCHAG00000001064
2	5171643	A	T	91.3	47.4781	40.48	24.5674	upstream_gene_variant	ankzf1	ENSCHAG00000001064
2	5171655	T	C	85.96	44.7012	41.06	24.9194	upstream_gene_variant	ankzf1	ENSCHAG00000001064
2	5171757	A	C	99.14	51.5551	50.06	30.3815	missense_variant	lrrc8c	ENSCHAG00000001029
2	5172064	C	T	51.05	26.5472	33.16	20.1249	upstream_gene_variant	lrrc8c	ENSCHAG00000001029
2	5172265	T	C	107.9	56.1105	59.18	35.9165	upstream_gene_variant	lrrc8c	ENSCHAG00000001029
2	5172796	G	A	98.51	51.2275	50.29	30.5211	upstream_gene_variant	lrrc8c	ENSCHAG00000001029
2	5172802	G	A	53.5	27.8213	31.12	18.8868	upstream_gene_variant	lrrc8c	ENSCHAG00000001029
2	5172814	C	A	92.73	48.2218	49.16	29.8353	upstream_gene_variant	lrrc8c	ENSCHAG00000001029
2	5173405	A	C	56.95	29.6153	20.62	12.5143	upstream_gene_variant	lrrc8c	ENSCHAG00000001029
2	5173428	T	G	37.32	19.4073	30.34	18.4134	upstream_gene_variant	lrrc8c	ENSCHAG00000001029
2	5173911	C	A	49.56	25.7724	31.59	19.1721	upstream_gene_variant	lrrc8c	ENSCHAG00000001029
2	5174088	A	T	102.3	53.1984	45.68	27.7233	upstream_gene_variant	lrrc8c	ENSCHAG00000001029
2	5174123	G	C	105.05	54.6285	50.24	30.4908	upstream_gene_variant	lrrc8c	ENSCHAG00000001029
2	5174664	A	T	85.52	44.4724	35.47	21.5268	synonymous_variant	ankzf1	ENSCHAG00000001064
2	5175552	A	C	63.33	32.9331	33.96	20.6104	upstream_gene_variant	lrrc8c	ENSCHAG00000001029
2	5176192	T	C	78.61	40.879	36.49	22.1459	upstream_gene_variant	lrrc8c	ENSCHAG00000001029
2	5176207	T	G	49.97	25.9856	30.47	18.4923	upstream_gene_variant	lrrc8c	ENSCHAG00000001029
2	5176511	T	C	100.38	52.2	47.47	28.8097	upstream_gene_variant	lrrc8c	ENSCHAG00000001029
2	5178822	T	C	63.55	33.0475	29.96	18.1828	intron_variant	ankzf1	ENSCHAG00000001064
2	5180338	A	C	62.92	32.7199	32.41	19.6697	intron_variant	ankzf1	ENSCHAG00000001064
2	5183618	G	C	55.93	29.0849	21.78	13.2183	downstream_gene_variant	glb1l	ENSCHAG00000001493
2	5187509	A	C	58.31	30.3226	25.08	15.2211	downstream_gene_variant	ankzf1	ENSCHAG00000001064
2	5187623	G	C	61.33	31.893	24.23	14.7052	downstream_gene_variant	ankzf1	ENSCHAG00000001064
2	5188158	C	A	59.74	31.0662	24.34	14.772	downstream_gene_variant	ankzf1	ENSCHAG00000001064
2	5188161	G	A	63.33	32.9331	24.56	14.9055	downstream_gene_variant	ankzf1	ENSCHAG00000001064
2	5190945	T	A	70.44	36.6305	21.38	12.9756	downstream_gene_variant	ankzf1	ENSCHAG00000001064
2	5191170	T	G	49	25.4812	31.23	18.9536	downstream_gene_variant	ankzf1	ENSCHAG00000001064
2	5192265	C	G	57.4	29.8493	26.5	16.0829	intron_variant	glb1l	ENSCHAG00000001493
2	5193008	G	T	51.41	26.7344	NA	#VALUE!	intron_variant	glb1l	ENSCHAG00000001493
2	5194067	A	G	60.4	31.4094	20.32	12.3323	intron_variant	glb1l	ENSCHAG00000001493
2	5194242	T	A	53.04	27.582	25.49	15.4699	intron_variant	glb1l	ENSCHAG00000001493
2	5194323	C	T	58.5	30.4214	21.11	12.8117	intron_variant	glb1l	ENSCHAG00000001493
2	5194327	G	C	54.77	28.4817	18.05	10.9546	intron_variant	glb1l	ENSCHAG00000001493
2	5194329	C	A	53.54	27.8421	16.92	10.2688	intron_variant	glb1l	ENSCHAG00000001493
2	5194332	C	T	60.16	31.2846	19.13	11.61	intron_variant	glb1l	ENSCHAG00000001493
2	5194376	T	C	51.11	26.5784	23.8	14.4443	intron_variant	glb1l	ENSCHAG00000001493
4	11058269	C	A	51	26.5212	5.8	3.52003	splice_donor_variant&intron_variant	ccdc22	ENSCHAG00000025621
4	11058883	C	A	50.44	26.23	4.49	2.72499	intron_variant	ccdc22	ENSCHAG00000025621
4	11093830	T	A	52.35	27.2232	4.95	3.00417	synonymous_variant	tbc1d25	ENSCHAG00000025739
4	11096889	T	C	58.16	30.2446	4.1	2.4883	downstream_gene_variant	tbc1d25	ENSCHAG00000025739
4	11099328	G	A	54.06	28.1125	5.3	3.21658	downstream_gene_variant	tbc1d25	ENSCHAG00000025739
4	11108903	T	G	51.05	26.5472	4.68	2.8403	intron_variant	magi1a	ENSCHAG00000025774
4	11109575	C	T	51.02	26.5316	4.53	2.74927	intron_variant	magi1a	ENSCHAG00000025774
4	11113611	A	G	66.86	34.7688	5.89	3.57466	intron_variant	magi1a	ENSCHAG00000025774
4	11115829	G	T	64.52	33.5519	5.98	3.62928	intron_variant	magi1a	ENSCHAG00000025774
4	11119884	C	T	53.63	27.8889	6.97	4.23011	intron_variant	magi1a	ENSCHAG00000025774
4	11120291	A	T	58.42	30.3798	1.29	0.782904	intron_variant	magi1a	ENSCHAG00000025774
4	11126486	C	T	51.62	26.8436	6.07	3.6839	intron_variant	magi1a	ENSCHAG00000025774
4	11131785	T	A	54.65	28.4193	4.96	3.01024	intron_variant	magi1a	ENSCHAG00000025774
4	11138395	C	T	61.63	32.049	4.89	2.96775	intron_variant	magi1a	ENSCHAG00000025774
4	11146651	G	A	66.41	34.5348	2.62	1.59008	intron_variant	magi1a	ENSCHAG00000025774
4	11148433	A	G	63.66	33.1047	1.94	1.17739	intron_variant	magi1a	ENSCHAG00000025774
4	11149615	T	A	90.41	47.0153	7.87	4.77632	intron_variant	magi1a	ENSCHAG00000025774
4	11150052	C	A	56.95	29.6153	4.07	2.47009	intron_variant	magi1a	ENSCHAG00000025774
4	11153989	T	G	55.54	28.8821	3.14	1.90567	intron_variant	magi1a	ENSCHAG00000025774
4	11165603	C	T	67.38	35.0392	6.63	4.02376	intron_variant	magi1a	ENSCHAG00000025774
4	11171455	G	A	85.35	44.384	5.67	3.44114	intron_variant	magi1a	ENSCHAG00000025774
4	11172685	A	G	78.18	40.6554	7.31	4.43646	intron_variant	magi1a	ENSCHAG00000025774
4	11172702	A	G	51.93	27.0048	6.1	3.70211	intron_variant	magi1a	ENSCHAG00000025774
4	11173830	T	C	79.41	41.2951	7.48	4.53963	intron_variant	magi1a	ENSCHAG00000025774
4	11174827	C	A	57.72	30.0158	5.87	3.56252	intron_variant	magi1a	ENSCHAG00000025774
4	11175785	A	G	84.45	43.916	7.41	4.49715	intron_variant	magi1a	ENSCHAG00000025774
4	11178499	C	A	72.35	37.6237	7.97	4.83701	intron_variant	magi1a	ENSCHAG00000025774
4	11179139	C	T	71.37	37.1141	8.78	5.3286	synonymous_variant	magi1a	ENSCHAG00000025774
4	11181395	C	T	78.3	40.7178	7.53	4.56998	intron_variant	magi1a	ENSCHAG00000025774
4	11182804	C	T	87.39	45.4449	4.71	2.85851	intron_variant	magi1a	ENSCHAG00000025774
4	11183941	C	A	59.36	30.8686	4.02	2.43975	intron_variant	magi1a	ENSCHAG00000025774
4	11185340	G	T	50.94	26.49	1.41	0.855733	intron_variant	magi1a	ENSCHAG00000025774
4	11185356	G	T	66.73	34.7012	5.7	3.45934	intron_variant	magi1a	ENSCHAG00000025774
4	11190663	C	A	80.11	41.6591	6.89	4.18156	intron_variant	magi1a	ENSCHAG00000025774
4	11194941	C	T	72.09	37.4885	6	3.64142	synonymous_variant	magi1a	ENSCHAG00000025774
4	11196848	G	A	83.06	43.1932	8.96	5.43785	intron_variant	magi1a	ENSCHAG00000025774
4	11198786	A	C	80.04	41.6227	6.59	3.99949	intron_variant	magi1a	ENSCHAG00000025774
4	11199810	A	G	88.23	45.8817	7.06	4.28473	intron_variant	magi1a	ENSCHAG00000025774
4	11200675	C	T	96.8	50.3383	6.31	3.82956	intron_variant	magi1a	ENSCHAG00000025774
4	11200738	C	T	87.28	45.3877	7.75	4.70349	intron_variant	magi1a	ENSCHAG00000025774
4	11202669	C	T	80.39	41.8047	7.58	4.60032	intron_variant	magi1a	ENSCHAG00000025774
4	11204418	G	A	93.84	48.799	6.9	4.18763	intron_variant	magi1a	ENSCHAG00000025774
4	11213252	G	T	83.38	43.3596	8.39	5.09191	downstream_gene_variant	magi1a	ENSCHAG00000025774
4	11213490	G	C	65.72	34.1759	4.96	3.01024	downstream_gene_variant	magi1a	ENSCHAG00000025774
4	11214637	C	T	80.3	41.7579	7.11	4.31508	downstream_gene_variant	rho	ENSCHAG00000025873
4	11215985	T	C	74.2	38.5857	6.81	4.13301	downstream_gene_variant	rho	ENSCHAG00000025873
4	11217516	A	T	75.15	39.0798	7.76	4.70956	missense_variant	rho	ENSCHAG00000025873
4	11218924	C	G	72.1	37.4937	9.62	5.8384	upstream_gene_variant	rho	ENSCHAG00000025873
4	11219083	G	A	65.74	34.1863	7.12	4.32115	upstream_gene_variant	rho	ENSCHAG00000025873
4	11219479	T	C	60.03	31.217	6.47	3.92666	upstream_gene_variant	rho	ENSCHAG00000025873
4	11219634	C	T	86.05	44.748	3.52	2.1363	upstream_gene_variant	rho	ENSCHAG00000025873
4	11220285	G	A	58.85	30.6034	2.65	1.60829	upstream_gene_variant	rho	ENSCHAG00000025873
4	11220828	G	A	76.27	39.6622	7.69	4.66708	upstream_gene_variant	rho	ENSCHAG00000025873
4	11220829	T	A	76.82	39.9482	7.21	4.37577	upstream_gene_variant	rho	ENSCHAG00000025873
4	11221376	G	T	94.65	49.2202	7.14	4.33328	upstream_gene_variant	rho	ENSCHAG00000025873
4	11221427	C	T	89.43	46.5057	6.82	4.13908	upstream_gene_variant	rho	ENSCHAG00000025873
4	11222037	G	T	83.27	43.3024	7.53	4.56998	upstream_gene_variant	rho	ENSCHAG00000025873
4	11222087	G	A	82.72	43.0163	6.21	3.76886	upstream_gene_variant	rho	ENSCHAG00000025873
4	11226357	G	A	50.48	26.2508	3.79	2.30016	intergenic_region	rho-unannotated gene	ENSCHAG00000025873-ENSCHAG00000025875
4	11226693	C	A	86.99	45.2368	8.24	5.00088	intergenic_region	rho-unannotated gene	ENSCHAG00000025873-ENSCHAG00000025875
4	11235378	T	G	54.14	28.1541	1.68	1.0196	intergenic_region	rho-unannotated gene	ENSCHAG00000025873-ENSCHAG00000025875
4	11251063	T	G	53.67	27.9097	7.98	4.84308	upstream_gene_variant	prickle-like protein 2	ENSCHAG00000025879
4	11251355	G	T	91.01	47.3273	6.94	4.2119	5_prime_UTR_variant	prickle-like protein 2	ENSCHAG00000025879
4	11251584	C	T	91.58	47.6238	7.35	4.46073	intron_variant	prickle-like protein 2	ENSCHAG00000025879
4	11253232	T	G	52.67	27.3896	3.31	2.00885	intron_variant	prickle-like protein 2	ENSCHAG00000025879
4	11253258	C	T	104.44	54.3113	8.93	5.41964	intron_variant	prickle-like protein 2	ENSCHAG00000025879
4	11256776	A	C	85.9	44.67	6.3	3.82349	intron_variant	prickle-like protein 2	ENSCHAG00000025879
4	11256780	T	G	85.65	44.54	7.03	4.26652	intron_variant	prickle-like protein 2	ENSCHAG00000025879
4	11258533	A	T	68.05	35.3876	8.12	4.92805	intron_variant	prickle-like protein 2	ENSCHAG00000025879
4	11262324	G	A	87.09	45.2888	6.51	3.95094	intron_variant	prickle-like protein 2	ENSCHAG00000025879
4	11266852	A	T	74.9	38.9498	5.11	3.10127	intron_variant	prickle-like protein 2	ENSCHAG00000025879
4	11267609	C	T	80.17	41.6903	6.3	3.82349	intron_variant	prickle-like protein 2	ENSCHAG00000025879
4	11269375	G	A	55.21	28.7105	1.23	0.74649	intron_variant	prickle-like protein 2	ENSCHAG00000025879
4	11270694	A	C	74.53	38.7574	8.23	4.99481	intron_variant	prickle-like protein 2	ENSCHAG00000025879
4	11271232	G	A	79.04	41.1027	9.74	5.91123	intron_variant	prickle-like protein 2	ENSCHAG00000025879
4	11273262	T	A	60.83	31.633	1.4	0.849664	intron_variant	prickle-like protein 2	ENSCHAG00000025879
4	11280719	T	C	65.62	34.1239	2.39	1.4505	intron_variant	prickle-like protein 2	ENSCHAG00000025879
4	11280720	C	T	83.71	43.5312	8.71	5.28612	intron_variant	prickle-like protein 2	ENSCHAG00000025879
4	11281965	A	G	60.12	31.2638	3.02	1.83285	intron_variant	prickle-like protein 2	ENSCHAG00000025879
4	11284892	C	A	85.29	44.3528	7.74	4.69743	intron_variant	prickle-like protein 2	ENSCHAG00000025879
4	11288446	G	T	81.86	42.5691	5.93	3.59893	intron_variant	prickle-like protein 2	ENSCHAG00000025879
4	11288922	C	T	70.78	36.8073	6.7	4.06625	intron_variant	prickle-like protein 2	ENSCHAG00000025879
4	11289195	C	T	66.42	34.54	7.77	4.71563	intron_variant	prickle-like protein 2	ENSCHAG00000025879
4	11289368	C	T	66.43	34.5452	7.07	4.2908	intron_variant	prickle-like protein 2	ENSCHAG00000025879
4	11289935	G	C	55.73	28.9809	4.4	2.67037	intron_variant	prickle-like protein 2	ENSCHAG00000025879
4	11290713	T	G	58.76	30.5566	4.64	2.81603	intron_variant	prickle-like protein 2	ENSCHAG00000025879
4	11291094	T	C	83.77	43.5624	5.87	3.56252	intron_variant	prickle-like protein 2	ENSCHAG00000025879
4	11291634	G	A	70.06	36.4328	4.78	2.90099	intron_variant	prickle-like protein 2	ENSCHAG00000025879
4	11293752	A	G	70.31	36.5629	7.71	4.67922	intron_variant	prickle-like protein 2	ENSCHAG00000025879
4	11294074	G	T	69.41	36.0948	7.35	4.46073	intron_variant	prickle-like protein 2	ENSCHAG00000025879
4	11294173	A	C	73.67	38.3101	7.27	4.41218	intron_variant	prickle-like protein 2	ENSCHAG00000025879
4	11294247	C	T	68.95	35.8556	6.96	4.22404	intron_variant	prickle-like protein 2	ENSCHAG00000025879
4	11295159	C	A	87.82	45.6685	5.61	3.40472	intron_variant	prickle-like protein 2	ENSCHAG00000025879
4	11297985	A	T	63.67	33.1099	5.44	3.30155	intron_variant	prickle-like protein 2	ENSCHAG00000025879
4	11304453	C	A	91.91	47.7954	7.24	4.39397	intron_variant	prickle-like protein 2	ENSCHAG00000025879
4	11306520	C	T	73.94	38.4505	6.19	3.75673	intron_variant	prickle-like protein 2	ENSCHAG00000025879
4	11307381	A	T	84.77	44.0824	8.54	5.18295	intron_variant	prickle-like protein 2	ENSCHAG00000025879
4	11309293	T	G	77.81	40.463	7.57	4.59425	intron_variant	prickle-like protein 2	ENSCHAG00000025879
4	11312293	A	C	69.3	36.0376	6.26	3.79921	intron_variant	prickle-like protein 2	ENSCHAG00000025879
4	11312622	G	A	74.69	38.8406	7.3	4.43039	intron_variant	prickle-like protein 2	ENSCHAG00000025879
4	11313208	A	C	60.03	31.217	3.96	2.40333	intron_variant	prickle-like protein 2	ENSCHAG00000025879
4	11313451	C	A	51.15	26.5992	3.68	2.2334	intron_variant	prickle-like protein 2	ENSCHAG00000025879
4	11316405	G	A	59.94	31.1702	7.76	4.70956	intron_variant	prickle-like protein 2	ENSCHAG00000025879
4	11320379	C	A	73.91	38.4349	7.4	4.49108	intron_variant	prickle-like protein 2	ENSCHAG00000025879
4	11323442	G	A	89.45	46.5161	10.22	6.20254	intron_variant	prickle-like protein 2	ENSCHAG00000025879
4	11326441	T	C	82.98	43.1516	8.65	5.24971	downstream_gene_variant	prickle-like protein 2	ENSCHAG00000025879
4	11327583	T	C	65.07	33.8379	5	3.03451	downstream_gene_variant	prickle-like protein 2	ENSCHAG00000025879
4	11328511	T	A	69.02	35.892	6.93	4.20583	downstream_gene_variant	prickle-like protein 2	ENSCHAG00000025879
4	11333380	G	A	65.61	34.1187	5.93	3.59893	missense_variant	unannotated gene	ENSCHAG00000025886
4	11338939	C	T	76.22	39.6362	6.37	3.86597	intron_variant	unannotated gene	ENSCHAG00000025886
4	11342700	C	A	70.76	36.7969	6.5	3.94487	intron_variant	unannotated gene	ENSCHAG00000025886
4	11347678	T	G	51.92	26.9996	7.55	4.58211	upstream_gene_variant	unannotated gene	ENSCHAG00000025886
4	11350657	C	A	67.35	35.0236	5.64	3.42293	intergenic_region	unannotated gene-qrich1	ENSCHAG00000025886-ENSCHAG00000025895
4	11351914	G	A	79.45	41.3159	6.7	4.06625	downstream_gene_variant	glutamine-rich protein 1-like (qrich1)	ENSCHAG00000025895
4	11353709	T	G	53.73	27.9409	2.77	1.68112	downstream_gene_variant	glutamine-rich protein 1-like (qrich1)	ENSCHAG00000025895
4	11353859	T	A	75.79	39.4126	8.14	4.94019	downstream_gene_variant	glutamine-rich protein 1-like (qrich1)	ENSCHAG00000025895
4	11358708	T	A	66.7	34.6856	5.02	3.04665	intron_variant	glutamine-rich protein 1-like (qrich1)	ENSCHAG00000025895
4	11359470	A	T	65.85	34.2435	6.09	3.69604	intron_variant	glutamine-rich protein 1-like (qrich1)	ENSCHAG00000025895
4	11362704	G	A	73.11	38.0189	7.89	4.78846	synonymous_variant	glutamine-rich protein 1-like (qrich1)	ENSCHAG00000025895
4	11365709	G	A	72.34	37.6185	5	3.03451	upstream_gene_variant	glutamine-rich protein 1-like (qrich1)	ENSCHAG00000025895
4	11365710	G	T	73.07	37.9981	5.22	3.16803	upstream_gene_variant	glutamine-rich protein 1-like (qrich1)	ENSCHAG00000025895
4	11374036	C	A	51.09	26.568	0.4	0.242761	intron_variant	qars1	ENSCHAG00000026024
4	11374059	T	A	50.7	26.3652	0.08	0.0485522	intron_variant	qars1	ENSCHAG00000026024
4	11375008	A	C	65.85	34.2435	8.03	4.87343	intron_variant	qars1	ENSCHAG00000026024
4	11375364	A	G	53.16	27.6444	1.06	0.643317	intron_variant	qars1	ENSCHAG00000026024
4	11375961	T	C	63.65	33.0995	7.32	4.44253	intron_variant	qars1	ENSCHAG00000026024
4	11377560	C	T	59.45	30.9154	1.13	0.6858	intron_variant	qars1	ENSCHAG00000026024
4	11381122	A	G	73.61	38.2789	5.21	3.16196	synonymous_variant	qars1	ENSCHAG00000026024
4	11383125	A	C	56	29.1213	1.48	0.898216	upstream_gene_variant	qars1	ENSCHAG00000026024
4	11384692	C	G	58.09	30.2082	1.87	1.13491	upstream_gene_variant	qars1	ENSCHAG00000026024
4	11384912	T	G	60.32	31.3678	1.74	1.05601	upstream_gene_variant	qars1	ENSCHAG00000026024
4	11391629	G	A	76.54	39.8026	6.28	3.81135	intron_variant	espn	ENSCHAG00000026767
4	11394057	G	A	64.6	33.5935	3.34	2.02705	intron_variant	espn	ENSCHAG00000026767
4	11395888	T	A	74.9	38.9498	9.01	5.46819	intron_variant	espn	ENSCHAG00000026767
4	11397287	C	G	64.1	33.3335	7.24	4.39397	intron_variant	espn	ENSCHAG00000026767
4	11403979	G	A	65.9	34.2695	7.38	4.47894	intron_variant	espn	ENSCHAG00000026767
4	11404941	C	T	65.05	33.8275	6.94	4.2119	intron_variant	espn	ENSCHAG00000026767
4	11409027	C	A	67.56	35.1328	9.31	5.65026	intron_variant	espn	ENSCHAG00000026767
4	11416184	G	T	75.46	39.241	5.36	3.253	intron_variant	espn	ENSCHAG00000026767
4	11417307	A	G	66.41	34.5348	7.06	4.28473	intron_variant	espn	ENSCHAG00000026767
4	11420954	T	C	53.21	27.6705	4.07	2.47009	intron_variant	espn	ENSCHAG00000026767
4	11422394	T	G	67.58	35.1432	8.39	5.09191	intron_variant	espn	ENSCHAG00000026767
4	11426481	A	G	70.32	36.5681	9.27	5.62599	intron_variant	espn	ENSCHAG00000026767
4	11429002	C	A	59.11	30.7386	6.08	3.68997	intron_variant	espn	ENSCHAG00000026767
4	11429003	A	C	58.78	30.567	6.3	3.82349	intron_variant	espn	ENSCHAG00000026767
4	11432635	T	C	60.2	31.3054	8.1	4.91591	upstream_gene_variant	espn	ENSCHAG00000026767
4	11432823	G	A	68.57	35.658	5.83	3.53824	upstream_gene_variant	espn	ENSCHAG00000026767
4	11433033	G	C	60	31.2014	6.42	3.89631	upstream_gene_variant	espn	ENSCHAG00000026767
4	11449846	G	A	60.2	31.3054	4.71	2.85851	upstream_gene_variant	HES2	ENSCHAG00000026777
4	11453882	G	T	63.33	32.9331	5.75	3.48969	upstream_gene_variant	HES2	ENSCHAG00000026777
4	11457527	G	A	73.03	37.9773	5.73	3.47755	upstream_gene_variant	acot7	ENSCHAG00000026796
4	11459392	C	A	64.04	33.3023	7.04	4.27259	upstream_gene_variant	acot7	ENSCHAG00000026796
4	11460874	T	G	72.63	37.7693	7.46	4.52749	upstream_gene_variant	acot7	ENSCHAG00000026796
4	11463859	T	C	75.06	39.033	6.26	3.79921	intron_variant	acot7	ENSCHAG00000026796
4	11482156	C	G	56.79	29.5321	5.88	3.56859	intron_variant	acot7	ENSCHAG00000026796
4	11488797	G	C	61.63	32.049	7.87	4.77632	intron_variant	acot7	ENSCHAG00000026796
4	11489006	G	A	54.79	28.4921	6.03	3.65962	intron_variant	acot7	ENSCHAG00000026796
4	11497740	A	G	60.08	31.243	7.41	4.49715	intron_variant	acot7	ENSCHAG00000026796
4	11504977	G	T	57.2	29.7453	5.89	3.57466	intron_variant	acot7	ENSCHAG00000026796
4	11505131	C	A	57.88	30.099	6.75	4.09659	synonymous_variant	acot7	ENSCHAG00000026796
4	11524553	G	A	50.97	26.5056	2.02	1.22594	intron_variant	acot7	ENSCHAG00000026796
4	11524719	G	A	59.73	31.061	4.85	2.94348	intron_variant	acot7	ENSCHAG00000026796
4	11529898	C	T	58.28	30.307	5.44	3.30155	downstream_gene_variant	acot7	ENSCHAG00000026796
4	11530562	T	C	58.74	30.5462	6.66	4.04197	downstream_gene_variant	acot7	ENSCHAG00000026796
4	11531293	C	T	55.27	28.7417	6.45	3.91452	intergenic_region	acot7-gpr153	ENSCHAG00000026796-ENSCHAG00000026905
4	11533482	T	C	53.29	27.7121	7.21	4.37577	intergenic_region	acot7-gpr153	ENSCHAG00000026796-ENSCHAG00000026905
4	11534802	C	T	67.51	35.1068	6.54	3.96914	intergenic_region	acot7-gpr153	ENSCHAG00000026796-ENSCHAG00000026905
4	11540440	G	A	57.19	29.7401	5.96	3.61714	upstream_gene_variant	gpr153	ENSCHAG00000026905
4	11545404	A	G	55.42	28.8197	8.33	5.0555	intron_variant	gpr153	ENSCHAG00000026905
4	11545911	A	G	55.61	28.9185	6.78	4.1148	intron_variant	gpr153	ENSCHAG00000026905
4	11548774	G	A	55.13	28.6689	8.05	4.88557	intron_variant	gpr153	ENSCHAG00000026905
4	11549213	A	G	57.11	29.6985	5.2	3.15589	intron_variant	gpr153	ENSCHAG00000026905
4	11553899	C	A	52.54	27.322	5.01	3.04058	intron_variant	gpr153	ENSCHAG00000026905
4	11554755	G	C	56.09	29.1681	4.38	2.65823	intron_variant	gpr153	ENSCHAG00000026905
4	11558845	A	T	51.46	26.7604	2.48	1.50512	intron_variant	gpr153	ENSCHAG00000026905
4	11566577	A	G	54.87	28.5337	3.49	2.11809	downstream_gene_variant	gpr153	ENSCHAG00000026905
4	11589462	C	T	52.17	27.1296	4.43	2.68858	upstream_gene_variant	unannotated gene	ENSCHAG00000026911
4	11590629	G	T	55.85	29.0433	6.37	3.86597	upstream_gene_variant	unannotated gene	ENSCHAG00000026911
4	11594816	G	A	58.71	30.5306	6.98	4.23618	synonymous_variant	unannotated gene	ENSCHAG00000026911
4	11596708	C	T	52.6	27.3532	5.08	3.08306	intron_variant	unannotated gene	ENSCHAG00000026911
4	11624653	T	C	51.5	26.7812	5.7	3.45934	intergenic_region	unannotated gene-MIR133A2	ENSCHAG00000026911-ENSCHAG00000026916
4	11626926	G	T	62.67	32.5899	5.74	3.48362	intergenic_region	unannotated gene-MIR133A2	ENSCHAG00000026911-ENSCHAG00000026916
4	11628896	A	T	57.31	29.8025	5.2	3.15589	intergenic_region	unannotated gene-MIR133A2	ENSCHAG00000026911-ENSCHAG00000026916
4	11629151	G	A	58.72	30.5358	5.39	3.2712	intergenic_region	unannotated gene-MIR133A2	ENSCHAG00000026911-ENSCHAG00000026916
4	11631925	G	T	53.99	28.0761	4.99	3.02844	intergenic_region	unannotated gene-MIR133A2	ENSCHAG00000026911-ENSCHAG00000026916
4	11632502	C	A	56.31	29.2825	5.05	3.06486	intergenic_region	unannotated gene-MIR133A2	ENSCHAG00000026911-ENSCHAG00000026916
4	11637637	C	T	60.02	31.2118	6.35	3.85383	downstream_gene_variant	MIR133A2	ENSCHAG00000026916
4	11666816	G	A	50.21	26.1104	3.58	2.17271	intergenic_region	MIR133A2-gata5	ENSCHAG00000026916-ENSCHAG00000026919
4	11683966	C	T	55.01	28.6065	2.93	1.77822	intergenic_region	MIR133A2-gata5	ENSCHAG00000026916-ENSCHAG00000026919
6	6922159	T	C	53.51	27.8265	6.81	4.13301	intergenic_region	rnasel3-pcdh1b	ENSCHAG00000008157-ENSCHAG00000008178
6	6922781	G	T	54.03	28.0969	15.65	9.49802	intergenic_region	rnasel3-pcdh1b	ENSCHAG00000008157-ENSCHAG00000008178
6	6922915	A	G	71.97	37.4261	13.76	8.35098	intergenic_region	rnasel3-pcdh1b	ENSCHAG00000008157-ENSCHAG00000008178
6	6923199	A	C	53.32	27.7277	11.98	7.27069	intergenic_region	rnasel3-pcdh1b	ENSCHAG00000008157-ENSCHAG00000008178
6	6923265	T	C	55.99	29.1161	10.7	6.49386	intergenic_region	rnasel3-pcdh1b	ENSCHAG00000008157-ENSCHAG00000008178
7	10490858	T	C	55.4	28.8093	15.84	9.61334	upstream_gene_variant	aqp3a	ENSCHAG00000020687
7	10490901	G	T	50.3	26.1572	17.62	10.6936	upstream_gene_variant	aqp3a	ENSCHAG00000020687
7	10491282	C	A	55.99	29.1161	10.49	6.36641	upstream_gene_variant	aqp3a	ENSCHAG00000020687
7	10492134	C	A	55.96	29.1005	16.53	10.0321	upstream_gene_variant	aqp3a	ENSCHAG00000020687
7	10492168	C	T	54.65	28.4193	11.76	7.13717	upstream_gene_variant	aqp3a	ENSCHAG00000020687
7	10494285	G	A	53.51	27.8265	18.17	11.0274	downstream_gene_variant	nol6	ENSCHAG00000020209
7	10494467	C	G	50.68	26.3548	11.34	6.88227	downstream_gene_variant	nol6	ENSCHAG00000020209
7	28940795	G	C	14.95	7.77435	55.68	33.7923	missense_variant	unannotated gene	ENSCHAG00000012328
7	28942344	A	G	12.48	6.48989	52.64	31.9473	intron_variant	unannotated gene	ENSCHAG00000012328
7	28947663	C	T	9.93	5.16383	50.15	30.4362	intron_variant	unannotated gene	ENSCHAG00000012328
7	28952123	C	G	16.77	8.72079	52.26	31.7167	upstream_gene_variant	SLC12A2	ENSCHAG00000012492
7	28953403	C	T	15.52	8.07076	53.21	32.2933	missense_variant	SLC12A2	ENSCHAG00000012492
7	28955821	T	G	13.52	7.03072	56.56	34.3264	intron_variant	SLC12A2	ENSCHAG00000012492
7	28956075	C	T	13.55	7.04632	52.86	32.0809	intron_variant	SLC12A2	ENSCHAG00000012492
8	29851790	T	C	36.04	18.7416	39.85	24.1851	intergenic_region	lncRNA-cbin17	ENSCHAG00000010562-ENSCHAG00000010565
8	29852725	G	A	32.97	17.1452	31.99	19.4148	upstream_gene_variant	cbin17	ENSCHAG00000010565
8	29857726	G	C	52.65	27.3792	33.86	20.5497	missense_variant	cbin17	ENSCHAG00000010565
8	29857783	G	A	59.89	31.1442	31.29	18.99	missense_variant	cbin17	ENSCHAG00000010565
8	29857888	A	G	51.39	26.724	23.56	14.2986	missense_variant	cbin17	ENSCHAG00000010565
9	14236371	T	C	30.44	15.8295	38.3	23.2444	intergenic_region	kcnj5-st3gal4	ENSCHAG00000008999-ENSCHAG00000009012
9	14237274	A	G	33.33	17.3324	40.73	24.7191	intergenic_region	kcnj5-st3gal4	ENSCHAG00000008999-ENSCHAG00000009012
9	17177508	C	A	50.34	26.178	18.69	11.343	upstream_gene_variant	P2RY6	ENSCHAG00000004003
9	17177710	G	T	62.22	32.3559	23.27	14.1226	upstream_gene_variant	P2RY6	ENSCHAG00000004003
9	17177869	T	A	49.59	25.788	32.31	19.609	upstream_gene_variant	P2RY6	ENSCHAG00000004003
9	17178321	G	C	66.16	34.4048	23.65	14.3532	upstream_gene_variant	P2RY6	ENSCHAG00000004003
9	17178351	G	A	66.69	34.6804	18.35	11.1367	upstream_gene_variant	P2RY6	ENSCHAG00000004003
9	17178426	A	G	68.44	35.5904	18.53	11.2459	upstream_gene_variant	P2RY6	ENSCHAG00000004003
9	17178427	T	A	68.81	35.7828	18.64	11.3127	upstream_gene_variant	P2RY6	ENSCHAG00000004003
9	17178851	A	T	62.85	32.6835	22.63	13.7342	upstream_gene_variant	P2RY6	ENSCHAG00000004003
9	17179211	G	A	64.23	33.4011	25.53	15.4942	upstream_gene_variant	P2RY6	ENSCHAG00000004003
9	17179953	G	A	58.4	30.3694	20.86	12.66	upstream_gene_variant	P2RY6	ENSCHAG00000004003
9	17189652	C	T	64.82	33.7079	28.51	17.3028	intergenic_region	P2RY6-fam168a	ENSCHAG00000004003-ENSCHAG00000004019
9	17189695	G	A	59.71	31.0506	26.27	15.9433	intergenic_region	P2RY6-fam168a	ENSCHAG00000004003-ENSCHAG00000004019
9	17193367	A	C	52.87	27.4936	27.5	16.6898	intergenic_region	P2RY6-fam168a	ENSCHAG00000004003-ENSCHAG00000004019
9	17193380	C	A	93.81	48.7834	39.92	24.2275	intergenic_region	P2RY6-fam168a	ENSCHAG00000004003-ENSCHAG00000004019
9	17193399	A	T	56.12	29.1837	27.6	16.7505	intergenic_region	P2RY6-fam168a	ENSCHAG00000004003-ENSCHAG00000004019
9	17194169	T	A	87.06	45.2732	29.84	18.11	intergenic_region	P2RY6-fam168a	ENSCHAG00000004003-ENSCHAG00000004019
9	17195654	T	A	58.69	30.5202	22.37	13.5764	downstream_gene_variant	fam168a	ENSCHAG00000004019
9	17198205	G	A	82	42.6419	31.72	19.2509	downstream_gene_variant	fam168a	ENSCHAG00000004019
9	17198520	T	C	90.42	47.0205	28.97	17.582	downstream_gene_variant	fam168a	ENSCHAG00000004019
9	17198705	C	T	65.95	34.2956	21.04	12.7692	downstream_gene_variant	fam168a	ENSCHAG00000004019
9	17198721	A	T	78.9	41.0299	28.77	17.4606	downstream_gene_variant	fam168a	ENSCHAG00000004019
10	25102907	G	C	54.17	28.1697	7.65	4.6428	intergenic_region	dr1-lncRNA	ENSCHAG00000022113-ENSCHAG00000022117
10	25106027	A	C	55.38	28.7989	7.02	4.26046	upstream_gene_variant	lncRNA	ENSCHAG00000022117
10	25106034	C	A	55.49	28.8561	7.52	4.56391	upstream_gene_variant	lncRNA	ENSCHAG00000022117
10	25106270	T	C	50.89	26.464	9.73	5.90516	upstream_gene_variant	lncRNA	ENSCHAG00000022117
10	25106757	T	G	56.52	29.3917	7.23	4.38791	upstream_gene_variant	lncRNA	ENSCHAG00000022117
10	25107135	G	C	50.19	26.1	7.75	4.70349	upstream_gene_variant	lncRNA	ENSCHAG00000022117
10	25107289	A	G	54.84	28.5181	8.07	4.8977	upstream_gene_variant	lncRNA	ENSCHAG00000022117
10	25109403	C	A	52.93	27.5248	9.15	5.55316	upstream_gene_variant	lncRNA	ENSCHAG00000022117
10	25109649	G	A	50.5	26.2612	6.84	4.15121	upstream_gene_variant	lncRNA	ENSCHAG00000022117
10	25109650	A	T	50.99	26.516	6.95	4.21797	upstream_gene_variant	lncRNA	ENSCHAG00000022117
10	25111024	G	A	55.12	28.6637	8.14	4.94019	upstream_gene_variant	si:dkey-44g17.6(GNG12)	ENSCHAG00000022120
10	25112283	C	T	60.28	31.347	7.85	4.76418	upstream_gene_variant	si:dkey-44g17.6(GNG12)	ENSCHAG00000022120
10	25112322	G	A	54.4	28.2893	9.96	6.04475	upstream_gene_variant	si:dkey-44g17.6(GNG12)	ENSCHAG00000022120
10	25112338	G	A	56.42	29.3397	10.38	6.29965	upstream_gene_variant	si:dkey-44g17.6(GNG12)	ENSCHAG00000022120
10	25112397	C	G	55.2	28.7053	7.11	4.31508	upstream_gene_variant	si:dkey-44g17.6(GNG12)	ENSCHAG00000022120
10	25112495	A	T	55.06	28.6325	7.24	4.39397	upstream_gene_variant	si:dkey-44g17.6(GNG12)	ENSCHAG00000022120
10	25113770	C	T	58.02	30.1718	7.32	4.44253	upstream_gene_variant	si:dkey-44g17.6(GNG12)	ENSCHAG00000022120
10	25114275	G	A	51.31	26.6824	8.38	5.08584	upstream_gene_variant	si:dkey-44g17.6(GNG12)	ENSCHAG00000022120
10	25114460	T	G	50.83	26.4328	8.99	5.45605	upstream_gene_variant	si:dkey-44g17.6(GNG12)	ENSCHAG00000022120
10	25115561	G	T	57.24	29.7661	10.72	6.506	upstream_gene_variant	si:dkey-44g17.6(GNG12)	ENSCHAG00000022120
10	25116557	G	A	55.58	28.9029	7.17	4.35149	intron_variant	si:dkey-44g17.6(GNG12)	ENSCHAG00000022120
10	25116563	G	A	54.86	28.5285	7.65	4.6428	intron_variant	si:dkey-44g17.6(GNG12)	ENSCHAG00000022120
10	25117952	C	T	53.08	27.6028	7.59	4.60639	downstream_gene_variant	si:dkey-44g17.6(GNG12)	ENSCHAG00000022120
10	25120128	C	T	55.13	28.6689	10.34	6.27537	downstream_gene_variant	si:dkey-44g17.6(GNG12)	ENSCHAG00000022120
10	25120323	T	C	58.99	30.6762	8.54	5.18295	downstream_gene_variant	si:dkey-44g17.6(GNG12)	ENSCHAG00000022120
10	25121104	A	C	60.12	31.2638	7.21	4.37577	downstream_gene_variant	si:dkey-44g17.6(GNG12)	ENSCHAG00000022120
10	25121658	C	G	57.12	29.7037	7.8	4.73384	downstream_gene_variant	si:dkey-44g17.6(GNG12)	ENSCHAG00000022120
10	25121733	A	G	62.7	32.6055	6.16	3.73852	downstream_gene_variant	si:dkey-44g17.6(GNG12)	ENSCHAG00000022120
10	25121734	A	C	63.19	32.8603	6.28	3.81135	downstream_gene_variant	si:dkey-44g17.6(GNG12)	ENSCHAG00000022120
10	25122080	A	C	58.48	30.411	7.52	4.56391	downstream_gene_variant	si:dkey-44g17.6(GNG12)	ENSCHAG00000022120
10	25122091	A	G	59.51	30.9466	7.11	4.31508	downstream_gene_variant	si:dkey-44g17.6(GNG12)	ENSCHAG00000022120
10	25122242	C	A	58.82	30.5878	8.91	5.4075	downstream_gene_variant	si:dkey-44g17.6(GNG12)	ENSCHAG00000022120
10	25122303	T	C	53.04	27.582	8.37	5.07977	downstream_gene_variant	gadd45ab	ENSCHAG00000022129
10	25122445	A	G	52.27	27.1816	7.28	4.41825	downstream_gene_variant	gadd45ab	ENSCHAG00000022129
10	25122629	C	A	57.12	29.7037	6.19	3.75673	downstream_gene_variant	gadd45ab	ENSCHAG00000022129
10	25122689	A	G	61.3	31.8774	7.08	4.29687	downstream_gene_variant	gadd45ab	ENSCHAG00000022129
10	25123247	T	C	69.54	36.1624	9.55	5.79592	upstream_gene_variant	sec16b	ENSCHAG00000022133
10	25124273	A	C	60.33	31.373	8.05	4.88557	upstream_gene_variant	sec16b	ENSCHAG00000022133
10	25124665	T	C	52.37	27.2336	8.43	5.11619	upstream_gene_variant	sec16b	ENSCHAG00000022133
10	25124701	C	T	55.47	28.8457	7.98	4.84308	upstream_gene_variant	sec16b	ENSCHAG00000022133
10	25124797	C	A	51.3	26.6772	10.11	6.13578	upstream_gene_variant	sec16b	ENSCHAG00000022133
10	25126405	G	A	58.37	30.3538	10.64	6.45744	upstream_gene_variant	gadd45ab	ENSCHAG00000022129
10	25126432	G	T	58.39	30.3642	11.65	7.07041	upstream_gene_variant	gadd45ab	ENSCHAG00000022129
10	25126443	C	T	57.25	29.7713	12.02	7.29497	upstream_gene_variant	gadd45ab	ENSCHAG00000022129
10	25126789	G	T	52.91	27.5144	8.92	5.41357	upstream_gene_variant	gadd45ab	ENSCHAG00000022129
10	25127045	A	G	50.83	26.4328	8.5	5.15867	upstream_gene_variant	gadd45ab	ENSCHAG00000022129
10	25127730	A	G	54.67	28.4297	8.69	5.27398	upstream_gene_variant	gadd45ab	ENSCHAG00000022129
10	25127813	C	G	55.69	28.9601	10.46	6.3482	upstream_gene_variant	gadd45ab	ENSCHAG00000022129
10	25128044	T	C	54.62	28.4037	8.94	5.42571	upstream_gene_variant	gadd45ab	ENSCHAG00000022129
10	25128391	T	A	58.91	30.6346	9.96	6.04475	missense_variant	sec16b	ENSCHAG00000022133
10	25129171	C	A	57	29.6413	9.86	5.98406	upstream_gene_variant	gadd45ab	ENSCHAG00000022129
10	25129416	T	G	54.17	28.1697	6.44	3.90845	upstream_gene_variant	gadd45ab	ENSCHAG00000022129
10	25129543	C	G	51.51	26.7864	9.56	5.80199	upstream_gene_variant	gadd45ab	ENSCHAG00000022129
10	25129972	G	A	52.97	27.5456	8.04	4.8795	missense_variant	sec16b	ENSCHAG00000022133
10	25131166	G	A	54.17	28.1697	8.49	5.1526	upstream_gene_variant	gadd45ab	ENSCHAG00000022129
10	25131929	G	A	51.19	26.62	7.54	4.57605	missense_variant	sec16b	ENSCHAG00000022133
10	25131988	T	G	52.18	27.1348	8.29	5.03122	synonymous_variant	sec16b	ENSCHAG00000022133
10	25132207	G	A	57.28	29.7869	8.86	5.37716	intron_variant	sec16b	ENSCHAG00000022133
10	25132549	C	T	53.01	27.5664	10.44	6.33606	missense_variant	sec16b	ENSCHAG00000022133
10	25132669	C	A	56.51	29.3865	8.32	5.04943	intron_variant	sec16b	ENSCHAG00000022133
10	25132763	A	T	62.47	32.4859	9.7	5.88695	intron_variant	sec16b	ENSCHAG00000022133
10	25132791	C	T	64.96	33.7807	8.45	5.12833	intron_variant	sec16b	ENSCHAG00000022133
10	25133865	G	C	63.17	32.8499	9.4	5.70488	intron_variant	sec16b	ENSCHAG00000022133
10	25134450	G	A	50.05	26.0272	8.71	5.28612	intron_variant	sec16b	ENSCHAG00000022133
10	25134993	A	C	58.38	30.359	7.24	4.39397	intron_variant	sec16b	ENSCHAG00000022133
10	25135938	C	T	50.67	26.3496	7.06	4.28473	intron_variant	sec16b	ENSCHAG00000022133
10	25136301	T	C	57.64	29.9742	9.02	5.47426	intron_variant	sec16b	ENSCHAG00000022133
10	25138792	C	G	51.77	26.9216	9.15	5.55316	intron_variant	sec16b	ENSCHAG00000022133
10	25139414	C	A	58.52	30.4318	11.01	6.682	intron_variant	sec16b	ENSCHAG00000022133
10	25139537	C	T	59.35	30.8634	11.75	7.1311	missense_variant	sec16b	ENSCHAG00000022133
10	25139667	G	A	51.98	27.0308	10.59	6.4271	intron_variant	sec16b	ENSCHAG00000022133
10	25140017	A	T	56.53	29.3969	11.9	7.22214	missense_variant	sec16b	ENSCHAG00000022133
10	25140168	T	C	63.02	32.7719	9.45	5.73523	intron_variant	sec16b	ENSCHAG00000022133
10	25141199	C	T	51.1	26.5732	7.41	4.49715	intron_variant	sec16b	ENSCHAG00000022133
10	25141802	C	T	62.29	32.3923	11.62	7.05221	intron_variant	sec16b	ENSCHAG00000022133
10	25142017	G	T	52.37	27.2336	13.11	7.95649	intron_variant	sec16b	ENSCHAG00000022133
10	25142033	G	T	55.93	29.0849	12.67	7.68946	intron_variant	sec16b	ENSCHAG00000022133
10	25142127	G	T	50.37	26.1936	12.36	7.50132	intron_variant	sec16b	ENSCHAG00000022133
10	25142455	T	A	50.3	26.1572	9.58	5.81413	intron_variant	sec16b	ENSCHAG00000022133
10	25142588	T	A	52.8	27.4572	9.17	5.5653	intron_variant	sec16b	ENSCHAG00000022133
10	25143256	G	T	59.29	30.8322	8.52	5.17081	missense_variant	sec16b	ENSCHAG00000022133
10	25143257	C	T	59.1	30.7334	8.79	5.33467	synonymous_variant	sec16b	ENSCHAG00000022133
10	25143277	G	A	56.22	29.2357	9.7	5.88695	missense_variant	sec16b	ENSCHAG00000022133
10	25145370	T	A	69.1	35.9336	11.55	7.00972	downstream_gene_variant	sec16b	ENSCHAG00000022133
10	25145508	T	A	69.28	36.0272	10	6.06903	downstream_gene_variant	sec16b	ENSCHAG00000022133
10	25145591	A	C	69.44	36.1104	12.19	7.39814	downstream_gene_variant	sec16b	ENSCHAG00000022133
10	25145598	A	C	57.6	29.9534	10.03	6.08723	downstream_gene_variant	sec16b	ENSCHAG00000022133
10	25145708	G	A	57.16	29.7245	12.43	7.5438	downstream_gene_variant	sec16b	ENSCHAG00000022133
10	25145928	G	T	60.59	31.5082	12.9	7.82904	downstream_gene_variant	sec16b	ENSCHAG00000022133
10	25146664	G	T	56.99	29.6361	9.56	5.80199	downstream_gene_variant	sec16b	ENSCHAG00000022133
10	25146711	T	A	55.54	28.8821	10.24	6.21468	downstream_gene_variant	sec16b	ENSCHAG00000022133
10	25146846	C	A	59.27	30.8218	10.99	6.66986	downstream_gene_variant	sec16b	ENSCHAG00000022133
10	25146950	A	G	53.52	27.8317	10.27	6.23289	downstream_gene_variant	sec16b	ENSCHAG00000022133
10	25147009	A	G	51.87	26.9736	10.9	6.61524	downstream_gene_variant	sec16b	ENSCHAG00000022133
10	25148933	C	T	59.73	31.061	7.68	4.66101	downstream_gene_variant	sec16b	ENSCHAG00000022133
10	25148987	C	A	59.03	30.697	9.31	5.65026	downstream_gene_variant	sec16b	ENSCHAG00000022133
10	25149080	C	A	54.62	28.4037	8.97	5.44392	downstream_gene_variant	sec16b	ENSCHAG00000022133
10	25149367	T	C	56.32	29.2877	10.41	6.31786	intergenic_region	sec16b-znf648	ENSCHAG00000022133-ENSCHAG00000022182
10	25150048	A	T	61.42	31.9398	8.34	5.06157	intergenic_region	sec16b-znf648	ENSCHAG00000022133-ENSCHAG00000022182
10	25150073	C	A	66.93	34.8052	10.4	6.31179	intergenic_region	sec16b-znf648	ENSCHAG00000022133-ENSCHAG00000022182
10	25150137	A	G	76.76	39.917	11.14	6.76089	intergenic_region	sec16b-znf648	ENSCHAG00000022133-ENSCHAG00000022182
10	25150457	A	T	66.42	34.54	11.89	7.21607	intergenic_region	sec16b-znf648	ENSCHAG00000022133-ENSCHAG00000022182
10	25150559	G	C	68.82	35.788	11.54	7.00366	intergenic_region	sec16b-znf648	ENSCHAG00000022133-ENSCHAG00000022182
10	25150617	T	C	72.98	37.9513	9.89	6.00227	intergenic_region	sec16b-znf648	ENSCHAG00000022133-ENSCHAG00000022182
10	25150643	T	C	69.4	36.0896	9.83	5.96585	intergenic_region	sec16b-znf648	ENSCHAG00000022133-ENSCHAG00000022182
10	25150644	G	A	68.78	35.7672	9.76	5.92337	intergenic_region	sec16b-znf648	ENSCHAG00000022133-ENSCHAG00000022182
10	25150791	A	C	62.58	32.5431	9.66	5.86268	intergenic_region	sec16b-znf648	ENSCHAG00000022133-ENSCHAG00000022182
10	25150837	T	G	56.58	29.4229	10.78	6.54241	intergenic_region	sec16b-znf648	ENSCHAG00000022133-ENSCHAG00000022182
10	25150838	T	C	56.32	29.2877	10.85	6.58489	intergenic_region	sec16b-znf648	ENSCHAG00000022133-ENSCHAG00000022182
10	25150858	C	T	58.94	30.6502	10.43	6.32999	intergenic_region	sec16b-znf648	ENSCHAG00000022133-ENSCHAG00000022182
10	25150935	C	A	65.91	34.2747	9.53	5.78378	intergenic_region	sec16b-znf648	ENSCHAG00000022133-ENSCHAG00000022182
10	25150938	G	T	67.68	35.1952	10.47	6.35427	intergenic_region	sec16b-znf648	ENSCHAG00000022133-ENSCHAG00000022182
10	25150944	G	A	70.48	36.6513	9.8	5.94764	intergenic_region	sec16b-znf648	ENSCHAG00000022133-ENSCHAG00000022182
10	25151096	T	G	52.22	27.1556	11.31	6.86407	intergenic_region	sec16b-znf648	ENSCHAG00000022133-ENSCHAG00000022182
10	25151131	A	G	54.56	28.3725	11.74	7.12504	intergenic_region	sec16b-znf648	ENSCHAG00000022133-ENSCHAG00000022182
10	25151153	G	T	53.72	27.9357	11.04	6.7002	intergenic_region	sec16b-znf648	ENSCHAG00000022133-ENSCHAG00000022182
10	25151155	A	T	53.07	27.5976	11.21	6.80338	intergenic_region	sec16b-znf648	ENSCHAG00000022133-ENSCHAG00000022182
10	25151172	C	A	52.02	27.0516	10.1	6.12972	intergenic_region	sec16b-znf648	ENSCHAG00000022133-ENSCHAG00000022182
10	25151587	T	C	59.81	31.1026	12.08	7.33138	intergenic_region	sec16b-znf648	ENSCHAG00000022133-ENSCHAG00000022182
10	25151611	T	C	57.89	30.1042	12.4	7.52559	intergenic_region	sec16b-znf648	ENSCHAG00000022133-ENSCHAG00000022182
10	25151613	A	G	58.35	30.3434	12.73	7.72587	intergenic_region	sec16b-znf648	ENSCHAG00000022133-ENSCHAG00000022182
10	25151719	T	G	62.2	32.3455	10.91	6.62131	intergenic_region	sec16b-znf648	ENSCHAG00000022133-ENSCHAG00000022182
10	25151721	G	T	62.64	32.5743	10.9	6.61524	intergenic_region	sec16b-znf648	ENSCHAG00000022133-ENSCHAG00000022182
10	25151800	G	A	67.05	34.8676	10.65	6.46351	intergenic_region	sec16b-znf648	ENSCHAG00000022133-ENSCHAG00000022182
10	25151811	G	T	60.48	31.451	11.53	6.99759	intergenic_region	sec16b-znf648	ENSCHAG00000022133-ENSCHAG00000022182
10	25151866	T	C	64.9	33.7495	10.84	6.57882	intergenic_region	sec16b-znf648	ENSCHAG00000022133-ENSCHAG00000022182
10	25151881	A	C	63.07	32.7979	11.62	7.05221	intergenic_region	sec16b-znf648	ENSCHAG00000022133-ENSCHAG00000022182
10	25151949	T	A	65.84	34.2383	11.4	6.91869	upstream_gene_variant	znf648	ENSCHAG00000022182
10	25151955	G	A	64.54	33.5623	11.83	7.17966	upstream_gene_variant	znf648	ENSCHAG00000022182
10	25151959	T	G	63.98	33.2711	11.38	6.90655	upstream_gene_variant	znf648	ENSCHAG00000022182
10	25152073	A	G	73.51	38.2269	12.08	7.33138	upstream_gene_variant	znf648	ENSCHAG00000022182
10	25152081	G	T	69.41	36.0948	11.73	7.11897	upstream_gene_variant	znf648	ENSCHAG00000022182
10	25152100	C	A	65.34	33.9783	11.53	6.99759	upstream_gene_variant	znf648	ENSCHAG00000022182
10	25152110	T	C	63.74	33.1463	11.63	7.05828	upstream_gene_variant	znf648	ENSCHAG00000022182
10	25152938	A	C	66.27	34.462	9.79	5.94158	upstream_gene_variant	znf648	ENSCHAG00000022182
10	25152972	C	A	72.16	37.5249	9.17	5.5653	upstream_gene_variant	znf648	ENSCHAG00000022182
10	25153141	G	A	67.56	35.1328	9.63	5.84447	upstream_gene_variant	znf648	ENSCHAG00000022182
10	25153224	C	T	60.9	31.6694	12.22	7.41635	upstream_gene_variant	znf648	ENSCHAG00000022182
10	25153331	C	A	62.12	32.3039	14.9	9.04285	upstream_gene_variant	znf648	ENSCHAG00000022182
10	25153435	A	C	59	30.6814	13.54	8.21746	upstream_gene_variant	znf648	ENSCHAG00000022182
10	25153474	C	T	54.79	28.4921	13.09	7.94435	upstream_gene_variant	znf648	ENSCHAG00000022182
10	25154062	A	C	67.72	35.216	10.84	6.57882	upstream_gene_variant	znf648	ENSCHAG00000022182
10	25154174	A	C	60.88	31.659	11.51	6.98545	upstream_gene_variant	znf648	ENSCHAG00000022182
10	25154252	A	C	52.63	27.3688	9.39	5.69881	upstream_gene_variant	znf648	ENSCHAG00000022182
10	25154511	A	T	75.09	39.0486	9.85	5.97799	upstream_gene_variant	znf648	ENSCHAG00000022182
10	25154589	A	G	59.35	30.8634	10.31	6.25717	upstream_gene_variant	znf648	ENSCHAG00000022182
10	25154855	G	C	72.02	37.4521	11.11	6.74269	upstream_gene_variant	znf648	ENSCHAG00000022182
10	25154875	T	G	69.77	36.282	11.33	6.87621	upstream_gene_variant	znf648	ENSCHAG00000022182
10	25155126	C	A	70.02	36.412	9.54	5.78985	upstream_gene_variant	znf648	ENSCHAG00000022182
10	25155164	T	C	63.7	33.1255	7.98	4.84308	upstream_gene_variant	znf648	ENSCHAG00000022182
10	25155291	T	G	59.2	30.7854	8.63	5.23757	upstream_gene_variant	znf648	ENSCHAG00000022182
10	25155681	T	G	66.43	34.5452	10.79	6.54848	upstream_gene_variant	znf648	ENSCHAG00000022182
10	25155687	T	C	67.58	35.1432	11.22	6.80945	upstream_gene_variant	znf648	ENSCHAG00000022182
10	25155708	T	A	61.74	32.1063	10.91	6.62131	upstream_gene_variant	znf648	ENSCHAG00000022182
10	25155711	A	G	63.43	32.9851	11.02	6.68807	upstream_gene_variant	znf648	ENSCHAG00000022182
10	25156367	A	G	52.75	27.4312	9.36	5.68061	upstream_gene_variant	znf648	ENSCHAG00000022182
10	25156672	G	T	57.49	29.8962	12	7.28283	upstream_gene_variant	znf648	ENSCHAG00000022182
10	25156925	T	C	58.1	30.2134	10.82	6.56669	missense_variant	znf648	ENSCHAG00000022182
10	25157292	T	C	55.08	28.6429	10.12	6.14185	intron_variant	znf648	ENSCHAG00000022182
10	25158253	A	G	56.85	29.5633	11.45	6.94903	missense_variant	znf648	ENSCHAG00000022182
10	25158562	T	C	60.16	31.2846	9.85	5.97799	synonymous_variant	znf648	ENSCHAG00000022182
10	25158810	A	G	59.3	30.8374	10.28	6.23896	downstream_gene_variant	znf648	ENSCHAG00000022182
10	25159678	T	C	73.25	38.0917	13.82	8.38739	downstream_gene_variant	znf648	ENSCHAG00000022182
10	25159925	G	T	64.36	33.4687	10.92	6.62738	downstream_gene_variant	znf648	ENSCHAG00000022182
10	25160048	C	T	61.94	32.2103	11.23	6.81552	downstream_gene_variant	znf648	ENSCHAG00000022182
10	25160654	C	T	53.54	27.8421	10.84	6.57882	downstream_gene_variant	znf648	ENSCHAG00000022182
10	25160732	A	G	70	36.4016	11.08	6.72448	downstream_gene_variant	znf648	ENSCHAG00000022182
10	25160899	A	T	63.44	32.9903	9.55	5.79592	downstream_gene_variant	znf648	ENSCHAG00000022182
10	25160918	T	C	64.56	33.5727	8.4	5.09798	downstream_gene_variant	znf648	ENSCHAG00000022182
10	25161166	C	T	50.85	26.4432	9.4	5.70488	downstream_gene_variant	znf648	ENSCHAG00000022182
10	25161932	C	A	59.65	31.0194	11.66	7.07648	downstream_gene_variant	znf648	ENSCHAG00000022182
10	25161965	A	C	66.74	34.7064	11.84	7.18573	downstream_gene_variant	znf648	ENSCHAG00000022182
10	25161998	T	G	67.09	34.8884	11.11	6.74269	downstream_gene_variant	znf648	ENSCHAG00000022182
10	25162000	T	C	69.71	36.2508	11.18	6.78517	downstream_gene_variant	znf648	ENSCHAG00000022182
10	25162114	G	A	55.59	28.9081	9.45	5.73523	downstream_gene_variant	znf648	ENSCHAG00000022182
10	25162253	C	T	60.81	31.6226	9.04	5.4864	downstream_gene_variant	znf648	ENSCHAG00000022182
10	25162331	C	A	60.42	31.4198	9.17	5.5653	downstream_gene_variant	znf648	ENSCHAG00000022182
10	25163022	A	T	58.36	30.3486	9.75	5.9173	downstream_gene_variant	znf648	ENSCHAG00000022182
10	25163140	T	C	70.55	36.6877	10.02	6.08116	downstream_gene_variant	znf648	ENSCHAG00000022182
10	25163416	A	G	68.56	35.6528	10.73	6.51206	downstream_gene_variant	znf648	ENSCHAG00000022182
10	25163440	C	A	65.11	33.8587	9.86	5.98406	downstream_gene_variant	znf648	ENSCHAG00000022182
10	25163527	G	T	61.88	32.1791	13.38	8.12036	downstream_gene_variant	znf648	ENSCHAG00000022182
10	25164298	A	C	57.17	29.7297	8.42	5.11012	intergenic_region	znf648-glula	ENSCHAG00000022182-ENSCHAG00000022196
10	25164928	C	T	68.01	35.3668	9.51	5.77164	intergenic_region	znf648-glula	ENSCHAG00000022182-ENSCHAG00000022196
10	25165089	A	G	67.46	35.0808	10.55	6.40282	intergenic_region	znf648-glula	ENSCHAG00000022182-ENSCHAG00000022196
10	25165123	A	G	68.72	35.736	11.02	6.68807	intergenic_region	znf648-glula	ENSCHAG00000022182-ENSCHAG00000022196
10	25165141	A	T	59.79	31.0922	10.83	6.57275	intergenic_region	znf648-glula	ENSCHAG00000022182-ENSCHAG00000022196
10	25165463	G	T	63.96	33.2607	10.91	6.62131	intergenic_region	znf648-glula	ENSCHAG00000022182-ENSCHAG00000022196
10	25165703	A	C	59.13	30.749	9.3	5.64419	intergenic_region	znf648-glula	ENSCHAG00000022182-ENSCHAG00000022196
10	25166427	C	G	59.48	30.931	9.55	5.79592	intergenic_region	znf648-glula	ENSCHAG00000022182-ENSCHAG00000022196
10	25167031	A	G	57.48	29.891	9.83	5.96585	intergenic_region	znf648-glula	ENSCHAG00000022182-ENSCHAG00000022196
10	25167177	C	A	72.99	37.9565	8.96	5.43785	intergenic_region	znf648-glula	ENSCHAG00000022182-ENSCHAG00000022196
10	25167221	A	G	60.92	31.6798	8.87	5.38323	intergenic_region	znf648-glula	ENSCHAG00000022182-ENSCHAG00000022196
10	25168319	T	A	64.41	33.4947	6.62	4.01769	intergenic_region	znf648-glula	ENSCHAG00000022182-ENSCHAG00000022196
10	25169678	T	C	53.14	27.634	7.27	4.41218	intergenic_region	znf648-glula	ENSCHAG00000022182-ENSCHAG00000022196
10	25170249	T	G	56.48	29.3709	6.83	4.14514	intergenic_region	znf648-glula	ENSCHAG00000022182-ENSCHAG00000022196
10	25171567	C	A	53.91	28.0345	9.73	5.90516	intergenic_region	znf648-glula	ENSCHAG00000022182-ENSCHAG00000022196
10	25171685	T	A	58.48	30.411	11.22	6.80945	intergenic_region	znf648-glula	ENSCHAG00000022182-ENSCHAG00000022196
10	25171979	A	G	57.87	30.0938	11.58	7.02793	intergenic_region	znf648-glula	ENSCHAG00000022182-ENSCHAG00000022196
10	25174616	T	A	53.67	27.9097	9.59	5.8202	intergenic_region	znf648-glula	ENSCHAG00000022182-ENSCHAG00000022196
10	25175817	A	G	53.12	27.6236	11.79	7.15538	intergenic_region	znf648-glula	ENSCHAG00000022182-ENSCHAG00000022196
10	25175964	T	G	56.41	29.3345	12.28	7.45276	intergenic_region	znf648-glula	ENSCHAG00000022182-ENSCHAG00000022196
10	25175979	T	A	55.39	28.8041	11.79	7.15538	intergenic_region	znf648-glula	ENSCHAG00000022182-ENSCHAG00000022196
10	25175980	A	C	55.39	28.8041	11.82	7.17359	intergenic_region	znf648-glula	ENSCHAG00000022182-ENSCHAG00000022196
10	25176047	A	C	55.13	28.6689	11.27	6.83979	intergenic_region	znf648-glula	ENSCHAG00000022182-ENSCHAG00000022196
10	25176057	T	G	55.76	28.9965	11.33	6.87621	intergenic_region	znf648-glula	ENSCHAG00000022182-ENSCHAG00000022196
10	25176277	T	A	55.52	28.8717	8.04	4.8795	intergenic_region	znf648-glula	ENSCHAG00000022182-ENSCHAG00000022196
10	25177705	C	T	57.31	29.8025	4.96	3.01024	intergenic_region	znf648-glula	ENSCHAG00000022182-ENSCHAG00000022196
10	25177791	T	C	50.18	26.0948	6.37	3.86597	intergenic_region	znf648-glula	ENSCHAG00000022182-ENSCHAG00000022196
10	25177956	A	G	52.88	27.4988	8.32	5.04943	intergenic_region	znf648-glula	ENSCHAG00000022182-ENSCHAG00000022196
10	25178660	T	C	56.9	29.5893	9.13	5.54102	intergenic_region	znf648-glula	ENSCHAG00000022182-ENSCHAG00000022196
10	25184758	G	C	55.38	28.7989	9.74	5.91123	intergenic_region	znf648-glula	ENSCHAG00000022182-ENSCHAG00000022196
10	25184866	A	G	64.12	33.3439	10.42	6.32392	intergenic_region	znf648-glula	ENSCHAG00000022182-ENSCHAG00000022196
10	25185061	C	T	57.85	30.0834	9.19	5.57743	intergenic_region	znf648-glula	ENSCHAG00000022182-ENSCHAG00000022196
10	25185097	A	G	58.18	30.255	8.99	5.45605	intergenic_region	znf648-glula	ENSCHAG00000022182-ENSCHAG00000022196
10	25185141	C	G	56.61	29.4385	8.32	5.04943	intergenic_region	znf648-glula	ENSCHAG00000022182-ENSCHAG00000022196
10	25186503	A	G	50.61	26.3184	8.38	5.08584	downstream_gene_variant	glula	ENSCHAG00000022196
10	25186948	C	A	50.13	26.0688	7.34	4.45466	downstream_gene_variant	glula	ENSCHAG00000022196
10	25188620	C	T	55.64	28.9341	12.86	7.80477	downstream_gene_variant	glula	ENSCHAG00000022196
10	25188755	T	G	60.53	31.477	10.2	6.19041	downstream_gene_variant	glula	ENSCHAG00000022196
10	25188963	T	C	59.85	31.1234	9.13	5.54102	downstream_gene_variant	glula	ENSCHAG00000022196
10	25189017	T	C	62.74	32.6263	9.91	6.0144	downstream_gene_variant	glula	ENSCHAG00000022196
10	25189332	C	A	50.43	26.2248	10.39	6.30572	downstream_gene_variant	glula	ENSCHAG00000022196
10	25189352	T	G	51.44	26.75	10.17	6.1722	downstream_gene_variant	glula	ENSCHAG00000022196
10	25189572	A	G	52.26	27.1764	8.73	5.29826	downstream_gene_variant	glula	ENSCHAG00000022196
10	25190059	A	G	51.96	27.0204	9.77	5.92944	downstream_gene_variant	glula	ENSCHAG00000022196
10	25190191	G	T	53.08	27.6028	11.18	6.78517	downstream_gene_variant	glula	ENSCHAG00000022196
10	25190227	G	T	57.23	29.7609	11.07	6.71841	downstream_gene_variant	glula	ENSCHAG00000022196
10	25190460	A	T	55.86	29.0485	10.62	6.44531	downstream_gene_variant	glula	ENSCHAG00000022196
10	25190711	G	A	52.24	27.166	11.77	7.14324	3_prime_UTR_variant	glula	ENSCHAG00000022196
10	25190922	T	C	62.09	32.2883	10.9	6.61524	3_prime_UTR_variant	glula	ENSCHAG00000022196
10	25192169	T	C	51.98	27.0308	10.41	6.31786	synonymous_variant	glula	ENSCHAG00000022196
10	25192503	G	A	53.85	28.0033	13.61	8.25994	intron_variant	glula	ENSCHAG00000022196
10	25193260	G	A	55.01	28.6065	9.08	5.51068	synonymous_variant	glula	ENSCHAG00000022196
10	25193281	T	A	57.31	29.8025	8.79	5.33467	synonymous_variant	glula	ENSCHAG00000022196
10	25193317	C	G	67.62	35.164	10.36	6.28751	synonymous_variant	glula	ENSCHAG00000022196
10	25193441	A	G	62.84	32.6783	11.16	6.77303	intron_variant	glula	ENSCHAG00000022196
10	25194195	C	G	54.57	28.3777	10.58	6.42103	upstream_gene_variant	glula	ENSCHAG00000022196
10	25194576	C	A	58.07	30.1978	9.74	5.91123	upstream_gene_variant	glula	ENSCHAG00000022196
10	25194882	G	A	58.11	30.2186	8.84	5.36502	upstream_gene_variant	glula	ENSCHAG00000022196
10	25194891	T	A	59.21	30.7906	8.34	5.06157	upstream_gene_variant	glula	ENSCHAG00000022196
10	25194920	G	C	59.29	30.8322	8.14	4.94019	upstream_gene_variant	glula	ENSCHAG00000022196
10	25194964	T	A	54.49	28.3361	9.02	5.47426	upstream_gene_variant	glula	ENSCHAG00000022196
10	25195236	T	G	68.14	35.4344	12.12	7.35566	upstream_gene_variant	glula	ENSCHAG00000022196
10	25195253	G	A	65.49	34.0563	11.12	6.74876	upstream_gene_variant	glula	ENSCHAG00000022196
10	25195483	C	A	51.6	26.8332	11.56	7.01579	upstream_gene_variant	glula	ENSCHAG00000022196
10	25195918	C	T	51.97	27.0256	7.94	4.81881	upstream_gene_variant	glula	ENSCHAG00000022196
10	25195919	A	G	55.83	29.0329	9.79	5.94158	upstream_gene_variant	glula	ENSCHAG00000022196
10	25196207	A	G	59.72	31.0558	9.97	6.05082	upstream_gene_variant	glula	ENSCHAG00000022196
10	25197244	T	C	52.6	27.3532	8.75	5.3104	upstream_gene_variant	glula	ENSCHAG00000022196
10	25197259	G	A	55.14	28.6741	8.96	5.43785	upstream_gene_variant	glula	ENSCHAG00000022196
10	25198087	C	G	60.64	31.5342	10.16	6.16613	upstream_gene_variant	glula	ENSCHAG00000022196
10	25198165	G	A	59.32	30.8478	11.38	6.90655	upstream_gene_variant	glula	ENSCHAG00000022196
10	25198294	T	C	56.19	29.2201	8.63	5.23757	upstream_gene_variant	glula	ENSCHAG00000022196
10	25198344	C	T	51.07	26.5576	8.89	5.39536	upstream_gene_variant	glula	ENSCHAG00000022196
10	25198480	G	C	53.39	27.7641	9.25	5.61385	upstream_gene_variant	glula	ENSCHAG00000022196
10	25198529	G	A	54.31	28.2425	9.52	5.77771	upstream_gene_variant	glula	ENSCHAG00000022196
10	25198536	A	C	51.2	26.6252	10.65	6.46351	upstream_gene_variant	glula	ENSCHAG00000022196
10	25198609	G	T	57.91	30.1146	8.32	5.04943	upstream_gene_variant	glula	ENSCHAG00000022196
10	25198655	G	T	61.6	32.0334	7.87	4.77632	upstream_gene_variant	glula	ENSCHAG00000022196
10	25198672	C	T	62.22	32.3559	7.89	4.78846	upstream_gene_variant	glula	ENSCHAG00000022196
10	25198813	C	G	56.64	29.4541	9.58	5.81413	upstream_gene_variant	glula	ENSCHAG00000022196
10	25198824	C	T	53.67	27.9097	9.65	5.85661	upstream_gene_variant	glula	ENSCHAG00000022196
10	25199086	T	A	58.17	30.2498	11.38	6.90655	upstream_gene_variant	unannotated gene	ENSCHAG00000022250
10	25199188	T	C	54.96	28.5805	9.71	5.89302	upstream_gene_variant	unannotated gene	ENSCHAG00000022250
10	25199298	T	C	54.75	28.4713	10.66	6.46958	upstream_gene_variant	unannotated gene	ENSCHAG00000022250
10	25199332	A	G	50.09	26.048	10.47	6.35427	upstream_gene_variant	unannotated gene	ENSCHAG00000022250
10	25199689	T	G	52.57	27.3376	8.86	5.37716	5_prime_UTR_variant	unannotated gene	ENSCHAG00000022250
10	25200354	C	T	57.28	29.7869	7.77	4.71563	intron_variant	unannotated gene	ENSCHAG00000022250
10	25200356	C	T	57.72	30.0158	7.65	4.6428	intron_variant	unannotated gene	ENSCHAG00000022250
10	25201407	C	A	57.92	30.1198	9.85	5.97799	intron_variant	unannotated gene	ENSCHAG00000022250
10	25201500	C	T	63.87	33.2139	8.8	5.34074	intron_variant	unannotated gene	ENSCHAG00000022250
10	25201828	T	A	63.17	32.8499	9.9	6.00834	intron_variant	unannotated gene	ENSCHAG00000022250
10	25201860	G	T	64	33.2815	9.67	5.86875	intron_variant	unannotated gene	ENSCHAG00000022250
10	25201890	G	T	69.07	35.918	9.51	5.77164	intron_variant	unannotated gene	ENSCHAG00000022250
10	25201980	T	C	64.57	33.5779	11.72	7.1129	intron_variant	unannotated gene	ENSCHAG00000022250
10	25202137	T	A	65.34	33.9783	8.56	5.19509	intron_variant	unannotated gene	ENSCHAG00000022250
10	25202138	C	T	63.89	33.2243	8.16	4.95232	intron_variant	unannotated gene	ENSCHAG00000022250
10	25202801	A	C	61.44	31.9502	8	4.85522	missense_variant	unannotated gene	ENSCHAG00000022250
10	25202919	C	T	54.77	28.4817	8.34	5.06157	synonymous_variant	unannotated gene	ENSCHAG00000022250
10	25202949	G	A	53.88	28.0189	9.96	6.04475	synonymous_variant	unannotated gene	ENSCHAG00000022250
10	25203042	G	C	52.69	27.4	11.45	6.94903	missense_variant	unannotated gene	ENSCHAG00000022250
10	25203551	G	T	56.33	29.2929	6.97	4.23011	intron_variant	unannotated gene	ENSCHAG00000022250
10	25203709	A	T	53.62	27.8837	8.44	5.12226	intron_variant	unannotated gene	ENSCHAG00000022250
10	25203854	A	T	54.14	28.1541	9.74	5.91123	intron_variant	unannotated gene	ENSCHAG00000022250
10	25203911	C	T	65.59	34.1083	9.9	6.00834	intron_variant	unannotated gene	ENSCHAG00000022250
10	25204006	A	G	56.55	29.4073	10.43	6.32999	intron_variant	unannotated gene	ENSCHAG00000022250
10	25204048	G	T	64.94	33.7703	10.14	6.15399	missense_variant	unannotated gene	ENSCHAG00000022250
10	25204382	C	A	66.66	34.6648	11.98	7.27069	intron_variant	unannotated gene	ENSCHAG00000022250
10	25204392	C	T	67.21	34.9508	12.09	7.33745	intron_variant	unannotated gene	ENSCHAG00000022250
10	25204470	G	A	56.46	29.3605	10.22	6.20254	intron_variant	unannotated gene	ENSCHAG00000022250
10	25204576	A	G	61.03	31.737	10.65	6.46351	intron_variant	unannotated gene	ENSCHAG00000022250
10	25204653	T	C	58.89	30.6242	8.48	5.14653	intron_variant	unannotated gene	ENSCHAG00000022250
10	25204702	A	C	55.43	28.8249	8.64	5.24364	intron_variant	unannotated gene	ENSCHAG00000022250
10	25204821	C	T	59.26	30.8166	11.41	6.92476	intron_variant	unannotated gene	ENSCHAG00000022250
10	25204829	G	A	57.8	30.0574	11.04	6.7002	intron_variant	unannotated gene	ENSCHAG00000022250
10	25204860	T	A	60.21	31.3106	9.82	5.95978	intron_variant	unannotated gene	ENSCHAG00000022250
10	25205122	C	T	61.97	32.2259	9.96	6.04475	intron_variant	unannotated gene	ENSCHAG00000022250
10	25205259	C	T	59.58	30.983	10.57	6.41496	intron_variant	unannotated gene	ENSCHAG00000022250
10	25205291	A	G	56.36	29.3085	11.19	6.79124	intron_variant	unannotated gene	ENSCHAG00000022250
10	25205294	G	A	57.51	29.9066	10.9	6.61524	intron_variant	unannotated gene	ENSCHAG00000022250
10	25205898	T	C	63.11	32.8187	11.93	7.24035	synonymous_variant	unannotated gene	ENSCHAG00000022250
10	25206017	C	A	61.09	31.7682	10.41	6.31786	intron_variant	unannotated gene	ENSCHAG00000022250
10	25206024	A	T	62.3	32.3975	10.74	6.51813	intron_variant	unannotated gene	ENSCHAG00000022250
10	25206425	T	A	57.63	29.969	12.19	7.39814	intron_variant	unannotated gene	ENSCHAG00000022250
10	25206565	G	C	64.29	33.4323	11.87	7.20393	missense_variant	unannotated gene	ENSCHAG00000022250
10	25206797	G	T	58.62	30.4838	11.04	6.7002	intron_variant	unannotated gene	ENSCHAG00000022250
10	25206931	A	G	59.51	30.9466	10.33	6.2693	synonymous_variant	unannotated gene	ENSCHAG00000022250
10	25207156	A	G	53.39	27.7641	10.77	6.53634	intron_variant	unannotated gene	ENSCHAG00000022250
10	25207388	C	G	59.84	31.1182	11.01	6.682	intron_variant	unannotated gene	ENSCHAG00000022250
10	25207750	T	C	55.35	28.7833	13.15	7.98077	synonymous_variant	unannotated gene	ENSCHAG00000022250
10	25207803	T	A	59.54	30.9622	13.21	8.01718	missense_variant	unannotated gene	ENSCHAG00000022250
12	2274523	A	T	73.13	38.0293	24.3	14.7477	intergenic_region	nedd4l-prlra	ENSCHAG00000022691-ENSCHAG00000023363
12	2275269	T	C	82.21	42.7511	19.41	11.78	intergenic_region	nedd4l-prlra	ENSCHAG00000022691-ENSCHAG00000023363
12	2275542	C	T	66.54	34.6024	19.77	11.9985	intergenic_region	nedd4l-prlra	ENSCHAG00000022691-ENSCHAG00000023363
12	2275984	G	A	69.9	36.3496	16.45	9.98355	intergenic_region	nedd4l-prlra	ENSCHAG00000022691-ENSCHAG00000023363
12	2276488	G	A	57.63	29.969	27.37	16.6109	intergenic_region	nedd4l-prlra	ENSCHAG00000022691-ENSCHAG00000023363
12	2276786	G	T	68.1	35.4136	25.86	15.6945	intergenic_region	nedd4l-prlra	ENSCHAG00000022691-ENSCHAG00000023363
12	2276815	A	G	70.37	36.5941	25.56	15.5124	intergenic_region	nedd4l-prlra	ENSCHAG00000022691-ENSCHAG00000023363
12	2276918	A	G	66.37	34.514	20.27	12.3019	intergenic_region	nedd4l-prlra	ENSCHAG00000022691-ENSCHAG00000023363
12	2277000	G	A	72.29	37.5925	21.09	12.7996	intergenic_region	nedd4l-prlra	ENSCHAG00000022691-ENSCHAG00000023363
12	2277062	T	G	67.92	35.32	23.24	14.1044	intergenic_region	nedd4l-prlra	ENSCHAG00000022691-ENSCHAG00000023363
12	2277127	G	A	57.47	29.8858	20.86	12.66	intergenic_region	nedd4l-prlra	ENSCHAG00000022691-ENSCHAG00000023363
12	2277136	A	G	59.79	31.0922	18.44	11.1913	intergenic_region	nedd4l-prlra	ENSCHAG00000022691-ENSCHAG00000023363
12	2277149	A	G	60.39	31.4042	17.66	10.7179	intergenic_region	nedd4l-prlra	ENSCHAG00000022691-ENSCHAG00000023363
12	2277286	C	T	70.73	36.7813	20.5	12.4415	intergenic_region	nedd4l-prlra	ENSCHAG00000022691-ENSCHAG00000023363
12	2277315	G	A	73.96	38.4609	18.95	11.5008	intergenic_region	nedd4l-prlra	ENSCHAG00000022691-ENSCHAG00000023363
12	2277323	C	A	72.59	37.7485	17.74	10.7665	intergenic_region	nedd4l-prlra	ENSCHAG00000022691-ENSCHAG00000023363
12	2277723	A	C	79.33	41.2535	22.3	13.5339	intergenic_region	nedd4l-prlra	ENSCHAG00000022691-ENSCHAG00000023363
12	2277826	C	T	72.89	37.9045	24.35	14.7781	intergenic_region	nedd4l-prlra	ENSCHAG00000022691-ENSCHAG00000023363
12	2277917	T	A	71.48	37.1713	17.97	10.906	intergenic_region	nedd4l-prlra	ENSCHAG00000022691-ENSCHAG00000023363
12	2277939	A	C	72.9	37.9097	21.22	12.8785	intergenic_region	nedd4l-prlra	ENSCHAG00000022691-ENSCHAG00000023363
12	2279153	A	C	65.36	33.9887	35.73	21.6846	intergenic_region	nedd4l-prlra	ENSCHAG00000022691-ENSCHAG00000023363
12	2279210	G	A	49.8	25.8972	31.88	19.3481	intergenic_region	nedd4l-prlra	ENSCHAG00000022691-ENSCHAG00000023363
12	2279632	G	A	60.58	31.503	29.46	17.8793	intergenic_region	nedd4l-prlra	ENSCHAG00000022691-ENSCHAG00000023363
12	2279691	G	A	66.57	34.618	34.14	20.7197	intergenic_region	nedd4l-prlra	ENSCHAG00000022691-ENSCHAG00000023363
12	2279707	G	C	67.54	35.1224	30.37	18.4316	intergenic_region	nedd4l-prlra	ENSCHAG00000022691-ENSCHAG00000023363
12	2279712	C	A	68.53	35.6372	31.19	18.9293	intergenic_region	nedd4l-prlra	ENSCHAG00000022691-ENSCHAG00000023363
12	2280654	T	G	84.33	43.8536	24.48	14.857	intergenic_region	nedd4l-prlra	ENSCHAG00000022691-ENSCHAG00000023363
12	2281175	C	T	62.02	32.2519	26.42	16.0344	intergenic_region	nedd4l-prlra	ENSCHAG00000022691-ENSCHAG00000023363
12	2282441	T	C	55.28	28.7469	25.7	15.5974	upstream_gene_variant	prlra	ENSCHAG00000023363
12	2282477	T	C	73.6	38.2737	27.99	16.9872	upstream_gene_variant	prlra	ENSCHAG00000023363
12	2282504	T	A	71.14	36.9945	24.52	14.8813	upstream_gene_variant	prlra	ENSCHAG00000023363
12	2282741	A	G	74.13	38.5493	24.57	14.9116	upstream_gene_variant	prlra	ENSCHAG00000023363
12	2282753	G	A	70.25	36.5317	22.86	13.8738	upstream_gene_variant	prlra	ENSCHAG00000023363
12	2282997	A	T	66.34	34.4984	28.35	17.2057	upstream_gene_variant	prlra	ENSCHAG00000023363
12	2282998	A	T	66.11	34.3788	27.14	16.4713	upstream_gene_variant	prlra	ENSCHAG00000023363
12	2283016	G	T	53.96	28.0605	22.42	13.6068	upstream_gene_variant	prlra	ENSCHAG00000023363
12	2283055	C	A	71.56	37.2129	30.09	18.2617	upstream_gene_variant	prlra	ENSCHAG00000023363
12	2283107	G	C	73.22	38.0761	30.08	18.2556	upstream_gene_variant	prlra	ENSCHAG00000023363
12	2283164	C	A	73.89	38.4245	29.27	17.764	upstream_gene_variant	prlra	ENSCHAG00000023363
12	2283188	T	G	66.46	34.5608	31.35	19.0264	upstream_gene_variant	prlra	ENSCHAG00000023363
12	2283211	T	C	73.62	38.2841	35.21	21.369	upstream_gene_variant	prlra	ENSCHAG00000023363
12	2283213	A	G	74.2	38.5857	34.85	21.1506	upstream_gene_variant	prlra	ENSCHAG00000023363
12	2283225	T	G	75.9	39.4698	34.58	20.9867	upstream_gene_variant	prlra	ENSCHAG00000023363
12	2283411	A	C	74.37	38.6741	30.61	18.5773	upstream_gene_variant	prlra	ENSCHAG00000023363
12	2284158	C	T	79.87	41.5343	32.17	19.5241	upstream_gene_variant	prlra	ENSCHAG00000023363
12	2284222	A	T	80.92	42.0803	27.6	16.7505	upstream_gene_variant	prlra	ENSCHAG00000023363
12	2284368	G	A	63.78	33.1671	23.31	14.1469	upstream_gene_variant	prlra	ENSCHAG00000023363
12	2284661	T	A	71.74	37.3065	30.54	18.5348	upstream_gene_variant	prlra	ENSCHAG00000023363
12	2284779	T	G	73.34	38.1385	35.74	21.6907	upstream_gene_variant	prlra	ENSCHAG00000023363
12	2285068	T	A	77.05	40.0678	31.8	19.2995	upstream_gene_variant	prlra	ENSCHAG00000023363
12	2287791	C	A	55.14	28.6741	23.72	14.3957	intron_variant	prlra	ENSCHAG00000023363
12	15680111	C	T	51.84	26.958	2.51	1.52333	intron_variant	cytochrome P450 2D14-like(CYP2D14)	ENSCHAG00000023562
12	15683675	C	T	59.35	30.8634	3.33	2.02099	upstream_gene_variant	SCD5	ENSCHAG00000023635
12	15683747	T	C	51.82	26.9476	3.8	2.30623	upstream_gene_variant	SCD5	ENSCHAG00000023635
12	15685868	G	A	50.04	26.022	3.17	1.92388	downstream_gene_variant	cytochrome P450 2D14-like(CYP2D14)	ENSCHAG00000023562
12	15687346	A	G	50.02	26.0116	3.02	1.83285	synonymous_variant	SCD5	ENSCHAG00000023635
12	15687884	C	T	50.14	26.074	2.53	1.53546	downstream_gene_variant	cytochrome P450 2D14-like(CYP2D14)	ENSCHAG00000023562
12	15687949	G	C	53.68	27.9149	3.04	1.84498	downstream_gene_variant	cytochrome P450 2D14-like(CYP2D14)	ENSCHAG00000023562
12	15688326	C	T	50.17	26.0896	2.47	1.49905	missense_variant	SCD5	ENSCHAG00000023635
12	15689394	G	C	51.11	26.5784	2.84	1.7236	downstream_gene_variant	SCD5	ENSCHAG00000023635
12	15689518	C	T	50.22	26.1156	2.25	1.36553	downstream_gene_variant	SCD5	ENSCHAG00000023635
12	15690893	T	C	54.35	28.2633	2.68	1.6265	downstream_gene_variant	SCD5	ENSCHAG00000023635
12	15692372	G	T	53.23	27.6809	1.99	1.20774	downstream_gene_variant	SCD5	ENSCHAG00000023635
12	15693326	G	A	55.02	28.6117	2.79	1.69326	downstream_gene_variant	SCD5	ENSCHAG00000023635
12	15697367	G	A	53.35	27.7433	2.96	1.79643	upstream_gene_variant	tmem150c	ENSCHAG00000023639
12	15698802	G	A	52.78	27.4468	2.84	1.7236	upstream_gene_variant	tmem150c	ENSCHAG00000023639
12	15698817	G	A	58.39	30.3642	3.34	2.02705	upstream_gene_variant	tmem150c	ENSCHAG00000023639
12	15698881	A	T	58.3	30.3174	3.71	2.25161	upstream_gene_variant	tmem150c	ENSCHAG00000023639
12	15700828	G	A	53.78	27.9669	3.8	2.30623	downstream_gene_variant	enoph1	ENSCHAG00000002350
12	15700873	A	T	50.33	26.1728	3.8	2.30623	downstream_gene_variant	enoph1	ENSCHAG00000002350
12	15701571	A	G	51.06	26.5524	1.44	0.87394	downstream_gene_variant	tmem150c	ENSCHAG00000023639
12	15702993	G	C	62.72	32.6159	2.05	1.24415	downstream_gene_variant	tmem150c	ENSCHAG00000023639
12	15703210	C	T	58.01	30.1666	2.43	1.47477	upstream_gene_variant	hnrnpdl	ENSCHAG00000002440
12	15703754	G	A	50.15	26.0792	2.09	1.26843	synonymous_variant	enoph1	ENSCHAG00000002350
12	15703805	C	T	54.89	28.5441	3.24	1.96636	upstream_gene_variant	hnrnpdl	ENSCHAG00000002440
12	15703925	T	A	54.65	28.4193	1.5	0.910354	upstream_gene_variant	hnrnpdl	ENSCHAG00000002440
12	15703994	G	C	58.59	30.4682	3.31	2.00885	upstream_gene_variant	hnrnpdl	ENSCHAG00000002440
12	15704354	C	A	69.04	35.9024	3.49	2.11809	missense_variant	enoph1	ENSCHAG00000002350
12	15704795	A	G	62.56	32.5327	3.89	2.36085	upstream_gene_variant	hnrnpdl	ENSCHAG00000002440
12	15704858	A	C	54.57	28.3777	3.74	2.26982	upstream_gene_variant	hnrnpdl	ENSCHAG00000002440
12	15705235	G	T	64.45	33.5155	3.1	1.8814	upstream_gene_variant	hnrnpdl	ENSCHAG00000002440
12	15705290	G	T	63.77	33.1619	2.92	1.77216	upstream_gene_variant	hnrnpdl	ENSCHAG00000002440
12	15705787	T	G	73.2	38.0657	2.97	1.8025	upstream_gene_variant	hnrnpdl	ENSCHAG00000002440
12	15705911	T	A	72.74	37.8265	2.5	1.51726	upstream_gene_variant	hnrnpdl	ENSCHAG00000002440
12	15706146	G	A	73.67	38.3101	2.93	1.77822	upstream_gene_variant	hnrnpdl	ENSCHAG00000002440
12	15706449	G	T	63.16	32.8447	1.98	1.20167	upstream_gene_variant	hnrnpdl	ENSCHAG00000002440
12	15706465	G	A	63.72	33.1359	2.2	1.33519	upstream_gene_variant	hnrnpdl	ENSCHAG00000002440
12	15706646	A	G	61.36	31.9086	2.58	1.56581	upstream_gene_variant	enoph1	ENSCHAG00000002350
12	15707652	A	C	61.57	32.0178	3.67	2.22733	upstream_gene_variant	enoph1	ENSCHAG00000002350
12	15707693	C	T	58.58	30.463	3.26	1.9785	upstream_gene_variant	enoph1	ENSCHAG00000002350
12	15707805	T	C	54.85	28.5233	2.05	1.24415	upstream_gene_variant	enoph1	ENSCHAG00000002350
12	15707944	G	T	51.88	26.9788	2.51	1.52333	upstream_gene_variant	enoph1	ENSCHAG00000002350
12	15708054	C	G	50.73	26.3808	1.98	1.20167	upstream_gene_variant	enoph1	ENSCHAG00000002350
12	15708272	T	A	66.71	34.6908	2.05	1.24415	upstream_gene_variant	enoph1	ENSCHAG00000002350
12	15708309	C	T	65.36	33.9887	1.95	1.18346	upstream_gene_variant	enoph1	ENSCHAG00000002350
12	15708518	A	G	63.43	32.9851	2.85	1.72967	upstream_gene_variant	enoph1	ENSCHAG00000002350
12	15708670	G	C	52.94	27.53	2.75	1.66898	upstream_gene_variant	enoph1	ENSCHAG00000002350
12	15708857	T	C	57.84	30.0782	2.52	1.52939	upstream_gene_variant	enoph1	ENSCHAG00000002350
12	15708887	C	G	59	30.6814	2.53	1.53546	upstream_gene_variant	enoph1	ENSCHAG00000002350
12	15709633	C	T	58.47	30.4058	3.08	1.86926	upstream_gene_variant	enoph1	ENSCHAG00000002350
12	15709656	A	G	56.83	29.5529	3.34	2.02705	upstream_gene_variant	enoph1	ENSCHAG00000002350
12	15709711	C	T	57.89	30.1042	3.08	1.86926	upstream_gene_variant	enoph1	ENSCHAG00000002350
12	15709763	G	A	61.16	31.8046	3.08	1.86926	upstream_gene_variant	enoph1	ENSCHAG00000002350
12	15710397	G	A	55.28	28.7469	3.12	1.89354	upstream_gene_variant	enoph1	ENSCHAG00000002350
12	15710559	G	A	64.89	33.7443	3.33	2.02099	upstream_gene_variant	enoph1	ENSCHAG00000002350
12	15710643	T	C	72.45	37.6757	3.14	1.90567	synonymous_variant	hnrnpdl	ENSCHAG00000002440
12	15710815	C	T	68.5	35.6216	2.85	1.72967	upstream_gene_variant	enoph1	ENSCHAG00000002350
12	15710905	C	G	61.73	32.1011	4.12	2.50044	upstream_gene_variant	enoph1	ENSCHAG00000002350
12	15710972	T	C	56.51	29.3865	3.55	2.1545	upstream_gene_variant	enoph1	ENSCHAG00000002350
12	15711005	A	G	59.95	31.1754	2.98	1.80857	upstream_gene_variant	enoph1	ENSCHAG00000002350
12	15711006	T	G	60.83	31.633	3.15	1.91174	upstream_gene_variant	enoph1	ENSCHAG00000002350
12	15711505	A	G	65.32	33.9679	4.53	2.74927	upstream_gene_variant	enoph1	ENSCHAG00000002350
12	15711753	G	A	74.56	38.773	3.52	2.1363	intron_variant	hnrnpdl	ENSCHAG00000002440
12	15711879	T	C	51.24	26.646	3	1.82071	intron_variant	hnrnpdl	ENSCHAG00000002440
12	15712027	A	T	56.53	29.3969	3.28	1.99064	intron_variant	hnrnpdl	ENSCHAG00000002440
12	15712029	T	C	57.28	29.7869	3.36	2.03919	intron_variant	hnrnpdl	ENSCHAG00000002440
12	15712251	G	T	65.53	34.0771	2.63	1.59615	intron_variant	hnrnpdl	ENSCHAG00000002440
12	15712350	G	A	53.05	27.5872	2.02	1.22594	intron_variant	hnrnpdl	ENSCHAG00000002440
12	15715119	G	T	55.36	28.7885	2.62	1.59008	downstream_gene_variant	hnrnpdl	ENSCHAG00000002440
12	15723645	G	T	50.17	26.0896	2.66	1.61436	upstream_gene_variant	unannotated gene	ENSCHAG00000002685
12	15724026	G	A	53.47	27.8057	2.1	1.2745	upstream_gene_variant	unannotated gene	ENSCHAG00000002685
12	15724160	G	T	55.2	28.7053	2.99	1.81464	upstream_gene_variant	unannotated gene	ENSCHAG00000002685
12	15726334	A	C	53.83	27.9929	4.03	2.44582	upstream_gene_variant	unannotated gene	ENSCHAG00000002685
12	15727165	C	T	54.62	28.4037	3.01	1.82678	upstream_gene_variant	unannotated gene	ENSCHAG00000002685
12	15728032	T	C	51.24	26.646	2.33	1.41408	intergenic_region	unannotated gene-unannotated gene	ENSCHAG00000002685-ENSCHAG00000002871
12	15728131	C	A	54.93	28.5649	1.92	1.16525	intergenic_region	unannotated gene-unannotated gene	ENSCHAG00000002685-ENSCHAG00000002871
12	15728608	G	C	51.78	26.9268	1.76	1.06815	intergenic_region	unannotated gene-unannotated gene	ENSCHAG00000002685-ENSCHAG00000002871
12	15730696	G	C	51.12	26.5836	2.69	1.63257	intergenic_region	unannotated gene-unannotated gene	ENSCHAG00000002685-ENSCHAG00000002871
12	15731339	T	G	51.72	26.8956	3.78	2.29409	intergenic_region	unannotated gene-unannotated gene	ENSCHAG00000002685-ENSCHAG00000002871
12	15731558	A	G	50.43	26.2248	3.55	2.1545	intergenic_region	unannotated gene-unannotated gene	ENSCHAG00000002685-ENSCHAG00000002871
12	15731988	C	T	52.39	27.244	2.84	1.7236	intergenic_region	unannotated gene-unannotated gene	ENSCHAG00000002685-ENSCHAG00000002871
12	15732007	T	G	54.91	28.5545	2.11	1.28056	intergenic_region	unannotated gene-unannotated gene	ENSCHAG00000002685-ENSCHAG00000002871
12	15732679	T	C	52.94	27.53	2.66	1.61436	upstream_gene_variant	unannotated gene	ENSCHAG00000002871
12	15733208	T	A	53.71	27.9305	2.64	1.60222	upstream_gene_variant	unannotated gene	ENSCHAG00000002871
12	15733588	A	C	55.48	28.8509	2.58	1.56581	upstream_gene_variant	unannotated gene	ENSCHAG00000002871
12	15734662	C	G	55.26	28.7365	1.95	1.18346	upstream_gene_variant	unannotated gene	ENSCHAG00000002871
12	15746008	C	T	50.54	26.282	2.39	1.4505	intron_variant	unannotated gene	ENSCHAG00000002871
12	15764799	C	A	54.81	28.5025	2.69	1.63257	upstream_gene_variant	myh	ENSCHAG00000004106
12	15766951	G	A	50.41	26.2144	3.08	1.86926	synonymous_variant	myh	ENSCHAG00000004106
12	15771627	C	G	55.06	28.6325	2.64	1.60222	synonymous_variant	myh	ENSCHAG00000004106
12	15771697	T	C	52.69	27.4	2.08	1.26236	intron_variant	myh	ENSCHAG00000004106
12	15772112	A	G	52.54	27.322	3.04	1.84498	intron_variant	myh	ENSCHAG00000004106
12	15775649	G	T	55	28.6013	2.99	1.81464	downstream_gene_variant	myh	ENSCHAG00000004106
12	15775659	T	A	54.67	28.4297	3.11	1.88747	downstream_gene_variant	myh	ENSCHAG00000004106
12	15775661	T	G	53.56	27.8525	3.19	1.93602	downstream_gene_variant	myh	ENSCHAG00000004106
12	15775925	C	T	51.35	26.7032	2.54	1.54153	downstream_gene_variant	myh	ENSCHAG00000004106
12	15777966	T	C	52.14	27.114	2.38	1.44443	intergenic_region	myh-mmyhl	ENSCHAG00000004106-ENSCHAG00000004255
12	15778468	C	T	60.3	31.3574	3.42	2.07561	intergenic_region	myh-mmyhl	ENSCHAG00000004106-ENSCHAG00000004255
12	15778490	C	A	57.31	29.8025	3.74	2.26982	intergenic_region	myh-mmyhl	ENSCHAG00000004106-ENSCHAG00000004255
12	15778845	G	T	55.94	29.0901	2.63	1.59615	intergenic_region	myh-mmyhl	ENSCHAG00000004106-ENSCHAG00000004255
12	15778906	T	A	59.2	30.7854	3.24	1.96636	intergenic_region	myh-mmyhl	ENSCHAG00000004106-ENSCHAG00000004255
12	15778971	A	T	54.04	28.1021	3.28	1.99064	intergenic_region	myh-mmyhl	ENSCHAG00000004106-ENSCHAG00000004255
12	15779526	A	G	58.41	30.3746	3.46	2.09988	intergenic_region	myh-mmyhl	ENSCHAG00000004106-ENSCHAG00000004255
12	15779660	A	G	51.97	27.0256	2.44	1.48084	intergenic_region	myh-mmyhl	ENSCHAG00000004106-ENSCHAG00000004255
12	15779773	T	G	51.02	26.5316	2.76	1.67505	intergenic_region	myh-mmyhl	ENSCHAG00000004106-ENSCHAG00000004255
12	15779896	A	G	59.91	31.1546	1.17	0.710076	intergenic_region	myh-mmyhl	ENSCHAG00000004106-ENSCHAG00000004255
12	15780327	A	G	59.57	30.9778	2.67	1.62043	intergenic_region	myh-mmyhl	ENSCHAG00000004106-ENSCHAG00000004255
12	15780682	T	A	58.44	30.3902	4.23	2.5672	intergenic_region	myh-mmyhl	ENSCHAG00000004106-ENSCHAG00000004255
12	15780866	T	A	53.12	27.6236	4.01	2.43368	intergenic_region	myh-mmyhl	ENSCHAG00000004106-ENSCHAG00000004255
12	15781415	T	C	53.54	27.8421	2.8	1.69933	intergenic_region	myh-mmyhl	ENSCHAG00000004106-ENSCHAG00000004255
12	15782409	T	G	53.13	27.6288	2.86	1.73574	upstream_gene_variant	mmyhl	ENSCHAG00000004255
12	15783066	T	C	55.76	28.9965	2.94	1.78429	upstream_gene_variant	mmyhl	ENSCHAG00000004255
12	15783329	G	A	53.78	27.9669	1.73	1.04994	upstream_gene_variant	mmyhl	ENSCHAG00000004255
12	15783637	G	A	62.72	32.6159	3.6	2.18485	upstream_gene_variant	mmyhl	ENSCHAG00000004255
12	15785427	T	A	50.59	26.308	2.07	1.25629	upstream_gene_variant	mmyhl	ENSCHAG00000004255
12	15785831	A	C	50.08	26.0428	3.07	1.86319	upstream_gene_variant	mmyhl	ENSCHAG00000004255
12	15785947	T	A	53.49	27.8161	2.39	1.4505	upstream_gene_variant	mmyhl	ENSCHAG00000004255
12	15786030	C	T	53.17	27.6496	3.29	1.99671	upstream_gene_variant	mmyhl	ENSCHAG00000004255
12	15786142	T	C	55.42	28.8197	1.94	1.17739	upstream_gene_variant	mmyhl	ENSCHAG00000004255
12	15786232	A	C	59.46	30.9206	2.83	1.71753	upstream_gene_variant	mmyhl	ENSCHAG00000004255
12	15787266	C	T	55.28	28.7469	2.73	1.65684	intron_variant	mmyhl	ENSCHAG00000004255
12	15787467	T	A	57.77	30.0418	2.73	1.65684	intron_variant	mmyhl	ENSCHAG00000004255
12	15789513	T	C	62.68	32.5951	3.46	2.09988	intron_variant	mmyhl	ENSCHAG00000004255
12	15791484	T	C	57.55	29.9274	3.41	2.06954	intron_variant	mmyhl	ENSCHAG00000004255
12	15791829	A	T	53.12	27.6236	3.14	1.90567	intron_variant	mmyhl	ENSCHAG00000004255
12	15792751	A	G	64.24	33.4063	4.34	2.63396	intron_variant	mmyhl	ENSCHAG00000004255
12	15793511	C	G	57.39	29.8441	4.05	2.45796	missense_variant	mmyhl	ENSCHAG00000004255
12	15794165	C	A	55.47	28.8457	3.39	2.0574	missense_variant	mmyhl	ENSCHAG00000004255
12	15794449	C	T	59.89	31.1442	2.37	1.43836	missense_variant	mmyhl	ENSCHAG00000004255
12	15796909	G	A	57.63	29.969	2.85	1.72967	downstream_gene_variant	mmyhl	ENSCHAG00000004255
12	15797477	T	A	51.5	26.7812	3.58	2.17271	downstream_gene_variant	mmyhl	ENSCHAG00000004255
12	15797645	G	C	60.53	31.477	2.43	1.47477	downstream_gene_variant	mmyhl	ENSCHAG00000004255
12	15797813	T	C	50.93	26.4848	3.45	2.09381	downstream_gene_variant	mmyhl	ENSCHAG00000004255
12	15797826	A	C	50.88	26.4588	2.28	1.38374	downstream_gene_variant	mmyhl	ENSCHAG00000004255
12	15800348	A	G	54.54	28.3621	2.46	1.49298	downstream_gene_variant	mmyhl	ENSCHAG00000004255
12	15803286	A	C	59.15	30.7594	5.18	3.14376	intergenic_region	mmyhl-unannotated gene	ENSCHAG00000004255-ENSCHAG00000004307
12	15803443	G	T	62.92	32.7199	3.75	2.27588	intergenic_region	mmyhl-unannotated gene	ENSCHAG00000004255-ENSCHAG00000004307
12	15803521	C	T	53.12	27.6236	3.61	2.19092	intergenic_region	mmyhl-unannotated gene	ENSCHAG00000004255-ENSCHAG00000004307
12	15803546	C	T	55.77	29.0017	4.42	2.68251	intergenic_region	mmyhl-unannotated gene	ENSCHAG00000004255-ENSCHAG00000004307
12	15804409	C	T	63.73	33.1411	2.38	1.44443	intergenic_region	mmyhl-unannotated gene	ENSCHAG00000004255-ENSCHAG00000004307
12	15804479	A	C	53.76	27.9565	3.32	2.01492	intergenic_region	mmyhl-unannotated gene	ENSCHAG00000004255-ENSCHAG00000004307
12	15804796	C	T	57.55	29.9274	1.48	0.898216	intergenic_region	mmyhl-unannotated gene	ENSCHAG00000004255-ENSCHAG00000004307
12	15805346	T	A	51.59	26.828	2.49	1.51119	intergenic_region	mmyhl-unannotated gene	ENSCHAG00000004255-ENSCHAG00000004307
12	15813276	A	C	55.14	28.6741	3.84	2.33051	intergenic_region	mmyhl-unannotated gene	ENSCHAG00000004255-ENSCHAG00000004307
12	15815178	T	A	68.98	35.8712	2.31	1.40194	intergenic_region	mmyhl-unannotated gene	ENSCHAG00000004255-ENSCHAG00000004307
12	15815388	T	C	63.72	33.1359	3.01	1.82678	intergenic_region	mmyhl-unannotated gene	ENSCHAG00000004255-ENSCHAG00000004307
12	15815871	T	A	60.37	31.3938	2.99	1.81464	intergenic_region	mmyhl-unannotated gene	ENSCHAG00000004255-ENSCHAG00000004307
12	15815970	G	A	53.46	27.8005	2.11	1.28056	intergenic_region	mmyhl-unannotated gene	ENSCHAG00000004255-ENSCHAG00000004307
12	15816427	A	G	59.28	30.827	3.36	2.03919	intergenic_region	mmyhl-unannotated gene	ENSCHAG00000004255-ENSCHAG00000004307
12	15816599	A	C	62.18	32.3351	3.86	2.34264	intergenic_region	mmyhl-unannotated gene	ENSCHAG00000004255-ENSCHAG00000004307
12	15817062	G	T	59.36	30.8686	1.84	1.1167	intergenic_region	mmyhl-unannotated gene	ENSCHAG00000004255-ENSCHAG00000004307
12	15817112	T	C	63.96	33.2607	1.43	0.867871	intergenic_region	mmyhl-unannotated gene	ENSCHAG00000004255-ENSCHAG00000004307
12	15817144	A	C	59.14	30.7542	2.25	1.36553	intergenic_region	mmyhl-unannotated gene	ENSCHAG00000004255-ENSCHAG00000004307
12	15817318	T	G	62.41	32.4547	2.67	1.62043	intergenic_region	mmyhl-unannotated gene	ENSCHAG00000004255-ENSCHAG00000004307
12	15817442	G	T	74.02	38.4921	3.01	1.82678	intergenic_region	mmyhl-unannotated gene	ENSCHAG00000004255-ENSCHAG00000004307
12	15817641	T	A	70.01	36.4068	2.24	1.35946	intergenic_region	mmyhl-unannotated gene	ENSCHAG00000004255-ENSCHAG00000004307
12	15831869	A	G	50.57	26.2976	1.99	1.20774	intergenic_region	mmyhl-unannotated gene	ENSCHAG00000004255-ENSCHAG00000004307
12	15850265	T	G	52.77	27.4416	2.84	1.7236	intergenic_region	unannotated gene-myh	ENSCHAG00000004307-ENSCHAG00000004352
12	15850705	C	T	50.28	26.1468	2.78	1.68719	intergenic_region	unannotated gene-myh	ENSCHAG00000004307-ENSCHAG00000004352
12	15851650	C	A	56.61	29.4385	3.09	1.87533	intergenic_region	unannotated gene-myh	ENSCHAG00000004307-ENSCHAG00000004352
12	15852151	T	C	53.14	27.634	2.94	1.78429	intergenic_region	unannotated gene-myh	ENSCHAG00000004307-ENSCHAG00000004352
12	15856165	A	G	53.22	27.6757	2.68	1.6265	intergenic_region	unannotated gene-myh	ENSCHAG00000004307-ENSCHAG00000004352
12	15856167	T	A	50.72	26.3756	2.84	1.7236	intergenic_region	unannotated gene-myh	ENSCHAG00000004307-ENSCHAG00000004352
12	15856168	C	A	50.85	26.4432	2.89	1.75395	intergenic_region	unannotated gene-myh	ENSCHAG00000004307-ENSCHAG00000004352
12	15857201	G	A	57.65	29.9794	0.33	0.200278	intergenic_region	unannotated gene-myh	ENSCHAG00000004307-ENSCHAG00000004352
12	15857545	G	A	55.44	28.8301	3.87	2.34871	intergenic_region	unannotated gene-myh	ENSCHAG00000004307-ENSCHAG00000004352
12	15857973	C	T	54.78	28.4869	1.93	1.17132	intergenic_region	unannotated gene-myh	ENSCHAG00000004307-ENSCHAG00000004352
12	15857974	A	G	55.18	28.6949	3.44	2.08774	intergenic_region	unannotated gene-myh	ENSCHAG00000004307-ENSCHAG00000004352
12	15858418	T	C	55.92	29.0797	2.06	1.25022	intergenic_region	unannotated gene-myh	ENSCHAG00000004307-ENSCHAG00000004352
12	15858428	A	G	52.43	27.2648	2.08	1.26236	intergenic_region	unannotated gene-myh	ENSCHAG00000004307-ENSCHAG00000004352
12	15858522	A	C	52.88	27.4988	2.17	1.31698	intergenic_region	unannotated gene-myh	ENSCHAG00000004307-ENSCHAG00000004352
12	15859363	C	T	55.88	29.0589	4.07	2.47009	intergenic_region	unannotated gene-myh	ENSCHAG00000004307-ENSCHAG00000004352
12	15859421	C	G	58.26	30.2966	4.21	2.55506	intergenic_region	unannotated gene-myh	ENSCHAG00000004307-ENSCHAG00000004352
12	15859613	T	C	54.55	28.3673	3.81	2.3123	intergenic_region	unannotated gene-myh	ENSCHAG00000004307-ENSCHAG00000004352
12	15878536	A	C	52.59	27.348	2.97	1.8025	downstream_gene_variant	myh	ENSCHAG00000004352
12	15878540	T	G	51.22	26.6356	2.79	1.69326	downstream_gene_variant	myh	ENSCHAG00000004352
12	15878898	C	T	52.93	27.5248	3.11	1.88747	downstream_gene_variant	myh	ENSCHAG00000004352
12	15879105	A	G	51.68	26.8748	3.46	2.09988	downstream_gene_variant	myh	ENSCHAG00000004352
12	15879161	A	G	57.58	29.943	3.36	2.03919	downstream_gene_variant	myh	ENSCHAG00000004352
12	15879162	G	C	58.09	30.2082	3.5	2.12416	downstream_gene_variant	myh	ENSCHAG00000004352
12	15879675	A	C	59.61	30.9986	3.66	2.22126	downstream_gene_variant	myh	ENSCHAG00000004352
12	15879801	C	G	59.8	31.0974	3.21	1.94816	downstream_gene_variant	myh	ENSCHAG00000004352
12	15880237	A	G	53.64	27.8941	2.87	1.74181	downstream_gene_variant	myh	ENSCHAG00000004352
12	15880420	A	G	58.47	30.4058	2.44	1.48084	downstream_gene_variant	myh	ENSCHAG00000004352
12	15880708	T	G	65.99	34.3164	3.83	2.32444	downstream_gene_variant	myh	ENSCHAG00000004352
12	15881195	C	G	55.23	28.7209	3.62	2.19699	downstream_gene_variant	myh	ENSCHAG00000004352
12	15881318	A	C	57.82	30.0678	3.22	1.95423	downstream_gene_variant	myh	ENSCHAG00000004352
12	15882380	A	G	64.3	33.4375	3.54	2.14844	intergenic_region	myh-myh	ENSCHAG00000004352-ENSCHAG00000004703
12	15882644	A	G	51.68	26.8748	2.54	1.54153	intergenic_region	myh-myh	ENSCHAG00000004352-ENSCHAG00000004703
12	15883368	A	G	63.5	33.0215	2.48	1.50512	intergenic_region	myh-myh	ENSCHAG00000004352-ENSCHAG00000004703
12	15883632	T	G	56.67	29.4697	3.31	2.00885	intergenic_region	myh-myh	ENSCHAG00000004352-ENSCHAG00000004703
12	15884739	C	A	56.73	29.5009	2.88	1.74788	intergenic_region	myh-myh	ENSCHAG00000004352-ENSCHAG00000004703
12	15885197	A	C	58.19	30.2602	3.55	2.1545	intergenic_region	myh-myh	ENSCHAG00000004352-ENSCHAG00000004703
12	15885471	C	G	53.34	27.7381	3.07	1.86319	intergenic_region	myh-myh	ENSCHAG00000004352-ENSCHAG00000004703
12	15886683	G	A	58.09	30.2082	2.13	1.2927	intergenic_region	myh-myh	ENSCHAG00000004352-ENSCHAG00000004703
12	15887100	A	G	56.71	29.4905	2.08	1.26236	intergenic_region	myh-myh	ENSCHAG00000004352-ENSCHAG00000004703
12	15888253	A	C	63.55	33.0475	2.43	1.47477	intergenic_region	myh-myh	ENSCHAG00000004352-ENSCHAG00000004703
12	15888828	T	G	64.3	33.4375	1.98	1.20167	intergenic_region	myh-myh	ENSCHAG00000004352-ENSCHAG00000004703
12	15890639	G	T	55.07	28.6377	4.17	2.53078	intergenic_region	myh-myh	ENSCHAG00000004352-ENSCHAG00000004703
12	15890658	G	A	53.2	27.6653	3.84	2.33051	intergenic_region	myh-myh	ENSCHAG00000004352-ENSCHAG00000004703
12	15892385	T	G	65.94	34.2903	3.01	1.82678	intergenic_region	myh-myh	ENSCHAG00000004352-ENSCHAG00000004703
12	15892416	T	G	55.25	28.7313	3.16	1.91781	intergenic_region	myh-myh	ENSCHAG00000004352-ENSCHAG00000004703
12	15892436	C	T	53.19	27.6601	2.44	1.48084	intergenic_region	myh-myh	ENSCHAG00000004352-ENSCHAG00000004703
12	15892446	A	T	52.33	27.2128	1.97	1.1956	intergenic_region	myh-myh	ENSCHAG00000004352-ENSCHAG00000004703
12	15894465	G	C	51.81	26.9424	3.81	2.3123	intergenic_region	myh-myh	ENSCHAG00000004352-ENSCHAG00000004703
12	15896022	A	C	54.26	28.2165	4	2.42761	intergenic_region	myh-myh	ENSCHAG00000004352-ENSCHAG00000004703
12	15896792	A	C	52.24	27.166	4.79	2.90706	intergenic_region	myh-myh	ENSCHAG00000004352-ENSCHAG00000004703
12	16004620	C	A	51.06	26.5524	1.65	1.00139	intergenic_region	myh-unannotated gene	ENSCHAG00000006150-ENSCHAG00000007958
12	16005605	C	T	51.14	26.594	1.28	0.776835	intergenic_region	myh-unannotated gene	ENSCHAG00000006150-ENSCHAG00000007958
12	16005780	G	C	54.53	28.3569	2.96	1.79643	intergenic_region	myh-unannotated gene	ENSCHAG00000006150-ENSCHAG00000007958
12	16006187	A	C	59.71	31.0506	3.19	1.93602	intergenic_region	myh-unannotated gene	ENSCHAG00000006150-ENSCHAG00000007958
12	16009797	T	G	58.71	30.5306	2.24	1.35946	intergenic_region	myh-unannotated gene	ENSCHAG00000006150-ENSCHAG00000007958
12	16012039	T	C	70.3	36.5577	3.28	1.99064	intergenic_region	myh-unannotated gene	ENSCHAG00000006150-ENSCHAG00000007958
12	16012108	C	G	70.36	36.5889	3.37	2.04526	downstream_gene_variant	unannotated gene	ENSCHAG00000007958
12	16012785	A	G	64.42	33.4999	3.73	2.26375	downstream_gene_variant	unannotated gene	ENSCHAG00000007958
12	16013110	A	C	60.27	31.3418	2.53	1.53546	downstream_gene_variant	unannotated gene	ENSCHAG00000007958
12	16013404	C	T	57.29	29.7921	2.08	1.26236	downstream_gene_variant	unannotated gene	ENSCHAG00000007958
12	16015310	T	A	54.38	28.2789	2.2	1.33519	downstream_gene_variant	unannotated gene	ENSCHAG00000007958
12	16017272	C	T	62.02	32.2519	1.57	0.952837	intron_variant	unannotated gene	ENSCHAG00000007958
12	16017998	C	T	56.31	29.2825	3.16	1.91781	missense_variant	unannotated gene	ENSCHAG00000007958
12	16019980	G	C	50.04	26.022	1.49	0.904285	upstream_gene_variant	unannotated gene	ENSCHAG00000007958
12	16025731	C	T	50.97	26.5056	1.99	1.20774	intergenic_region	unannotated gene-unannotated gene	ENSCHAG00000007958-ENSCHAG00000007979
12	16030478	T	A	62.09	32.2883	2.71	1.64471	intergenic_region	unannotated gene-unannotated gene	ENSCHAG00000007958-ENSCHAG00000007979
12	16030517	C	T	58.53	30.437	2.94	1.78429	intergenic_region	unannotated gene-unannotated gene	ENSCHAG00000007958-ENSCHAG00000007979
12	16030752	C	T	53.85	28.0033	2.06	1.25022	intergenic_region	unannotated gene-unannotated gene	ENSCHAG00000007958-ENSCHAG00000007979
12	16032496	G	A	57.6	29.9534	1.96	1.18953	upstream_gene_variant	unannotated gene	ENSCHAG00000007979
12	16033289	G	A	53.07	27.5976	3.2	1.94209	upstream_gene_variant	unannotated gene	ENSCHAG00000007979
12	16034651	T	A	61.76	32.1167	2.29	1.38981	upstream_gene_variant	unannotated gene	ENSCHAG00000007979
12	16034767	C	A	65.01	33.8067	0.05	0.0303451	upstream_gene_variant	unannotated gene	ENSCHAG00000007979
12	16038898	C	G	53.89	28.0241	3.92	2.37906	downstream_gene_variant	unannotated gene	ENSCHAG00000007979
12	16038899	A	T	53.53	27.8369	3.97	2.4094	downstream_gene_variant	unannotated gene	ENSCHAG00000007979
12	16038906	A	C	53.35	27.7433	3.85	2.33657	downstream_gene_variant	unannotated gene	ENSCHAG00000007979
12	17833326	C	T	6.14	3.19294	50.84	30.8549	downstream_gene_variant	fut7	ENSCHAG00000024586
12	17833465	T	C	4.29	2.2309	56.37	34.2111	downstream_gene_variant	fut7	ENSCHAG00000024586
12	17838508	G	A	2.81	1.46127	52.51	31.8685	upstream_gene_variant	pou5f3	ENSCHAG00000024591
12	17839049	G	A	5.98	3.10974	51.22	31.0855	upstream_gene_variant	pou5f3	ENSCHAG00000024591
12	17897107	T	C	3.23	1.67968	56.32	34.1808	downstream_gene_variant	slc31a2	ENSCHAG00000024745
12	17897141	A	G	5.52	2.87053	52.08	31.6075	downstream_gene_variant	slc31a2	ENSCHAG00000024745
12	18380561	C	T	3.58	1.86168	50.29	30.5211	upstream_gene_variant	ehmt1b	ENSCHAG00000022747
12	18381306	G	A	4.73	2.45971	51.62	31.3283	upstream_gene_variant	ehmt1b	ENSCHAG00000022747
12	18382890	T	A	7.76	4.03538	50.71	30.776	upstream_gene_variant	ehmt1b	ENSCHAG00000022747
12	18393315	G	A	6.16	3.20334	54.06	32.8092	intergenic_region	ehmt1b-arrdc1b	ENSCHAG00000022747-ENSCHAG00000025627
12	18393368	G	A	6.04	3.14094	51.87	31.48	intergenic_region	ehmt1b-arrdc1b	ENSCHAG00000022747-ENSCHAG00000025627
12	18659800	A	C	4.18	2.1737	52.12	31.6318	5_prime_UTR_variant	gtf3c5	ENSCHAG00000025842
12	18662443	A	G	4.29	2.2309	50.1	30.4058	upstream_gene_variant	gtf3c5	ENSCHAG00000025842
12	18676404	G	C	4.82	2.50651	52.69	31.9777	upstream_gene_variant	gfi1b	ENSCHAG00000025850
12	18677161	A	T	4.89	2.54291	53.01	32.1719	upstream_gene_variant	gfi1b	ENSCHAG00000025850
12	18678807	C	T	8.2	4.26419	51.85	31.4679	5_prime_UTR_premature_start_codon_gain_variant	tsc1b	ENSCHAG00000025853
12	18679681	T	G	4.91	2.55332	55.57	33.7256	upstream_gene_variant	gfi1b	ENSCHAG00000025850
12	18680647	A	G	5.83	3.03174	57.25	34.7452	intron_variant	tsc1b	ENSCHAG00000025853
12	18682531	G	T	3.22	1.67448	51.53	31.2737	intron_variant	tsc1b	ENSCHAG00000025853
12	19122615	C	G	6.85	3.56216	51.37	31.1766	upstream_gene_variant	wdr5	ENSCHAG00000026230
12	19122908	T	C	4.18	2.1737	51.75	31.4072	upstream_gene_variant	wdr5	ENSCHAG00000026230
12	19124136	T	C	6.92	3.59856	52.4	31.8017	upstream_gene_variant	wdr5	ENSCHAG00000026230
12	20060974	C	A	4.4	2.2881	51.79	31.4315	upstream_gene_variant	glrx	ENSCHAG00000027210
12	20061054	A	G	9.8	5.09623	50.03	30.3633	upstream_gene_variant	glrx	ENSCHAG00000027210
12	20079212	G	A	8.76	4.55541	51.62	31.3283	intron_variant	ell2	ENSCHAG00000027215
12	20079403	G	T	6.4	3.32815	52.64	31.9473	intron_variant	ell2	ENSCHAG00000027215
12	20079494	T	G	5.79	3.01094	57.1	34.6541	intron_variant	ell2	ENSCHAG00000027215
12	20098439	G	T	8.77	4.56061	53.91	32.7181	downstream_gene_variant	pcsk1	ENSCHAG00000027248
12	20098455	C	T	9.49	4.93502	52.49	31.8563	downstream_gene_variant	pcsk1	ENSCHAG00000027248
12	20120660	T	C	4.72	2.45451	55.71	33.8105	missense_variant	pcsk1	ENSCHAG00000027248
12	20121680	T	G	7.57	3.93658	51.25	31.1038	upstream_gene_variant	pcsk1	ENSCHAG00000027248
12	20122760	G	C	7.57	3.93658	54.48	33.0641	upstream_gene_variant	pcsk1	ENSCHAG00000027248
12	20123135	T	G	4.33	2.2517	52.15	31.65	upstream_gene_variant	pcsk1	ENSCHAG00000027248
12	20123400	G	C	3.94	2.04889	51.27	31.1159	upstream_gene_variant	pcsk1	ENSCHAG00000027248
12	20200955	T	C	13.14	6.83311	58.6	35.5645	3_prime_UTR_variant	unannotated gene	ENSCHAG00000027346
12	20201368	T	C	14	7.28033	58.09	35.255	3_prime_UTR_variant	unannotated gene	ENSCHAG00000027346
12	20209148	C	T	9.87	5.13263	52.93	32.1234	upstream_gene_variant	unannotated gene	ENSCHAG00000027346
12	20221991	A	T	11.63	6.04787	51.83	31.4558	missense_variant	rexo4	ENSCHAG00000027355
12	20223337	A	G	6.83	3.55176	57.09	34.6481	upstream_gene_variant	rexo4	ENSCHAG00000027355
12	20225146	T	G	8.98	4.66981	50.05	30.3755	5_prime_UTR_variant	fnbp1b	ENSCHAG00000027362
12	20225815	T	A	8.08	4.20179	55.89	33.9198	upstream_gene_variant	rexo4	ENSCHAG00000027355
12	20225962	T	G	6.59	3.42695	56.46	34.2657	upstream_gene_variant	rexo4	ENSCHAG00000027355
12	20249012	A	G	8.54	4.441	53.53	32.4875	intron_variant	fnbp1b	ENSCHAG00000027362
12	20374246	T	G	5.37	2.79253	54.69	33.1915	intergenic_region	SnRNA-COL5A1	ENSCHAG00000027390-ENSCHAG00000027391
12	20374880	C	T	4.63	2.40771	59.96	36.3899	intergenic_region	SnRNA-COL5A1	ENSCHAG00000027390-ENSCHAG00000027391
12	20376324	T	C	1.27	0.66043	54.83	33.2765	intergenic_region	SnRNA-COL5A1	ENSCHAG00000027390-ENSCHAG00000027391
12	20377639	A	G	4.98	2.58972	50.03	30.3633	intergenic_region	SnRNA-COL5A1	ENSCHAG00000027390-ENSCHAG00000027391
12	20488529	G	A	2.21	1.14925	50.19	30.4604	intron_variant	olfm1b	ENSCHAG00000027400
12	20488951	T	C	3.88	2.01769	54.92	33.3311	intron_variant	olfm1b	ENSCHAG00000027400
12	20500343	C	A	5.66	2.94333	50.02	30.3573	intron_variant	olfm1b	ENSCHAG00000027400
12	20565245	A	G	7.63	3.96778	51.79	31.4315	intergenic_region	olfm1b-ppp1r26	ENSCHAG00000027400-ENSCHAG00000027413
12	20566167	T	C	3.17	1.64847	52.09	31.6136	intergenic_region	olfm1b-ppp1r26	ENSCHAG00000027400-ENSCHAG00000027413
12	20566192	T	G	3.15	1.63807	52.14	31.6439	intergenic_region	olfm1b-ppp1r26	ENSCHAG00000027400-ENSCHAG00000027413
12	20566336	G	T	5.15	2.67812	55.95	33.9562	intergenic_region	olfm1b-ppp1r26	ENSCHAG00000027400-ENSCHAG00000027413
12	20573526	T	G	4.4	2.2881	51.36	31.1705	intergenic_region	olfm1b-ppp1r26	ENSCHAG00000027400-ENSCHAG00000027413
12	20609036	A	G	6.68	3.47376	50.57	30.6911	intergenic_region	olfm1b-ppp1r26	ENSCHAG00000027400-ENSCHAG00000027413
12	20639385	G	C	7.32	3.80657	50.08	30.3937	intergenic_region	olfm1b-ppp1r26	ENSCHAG00000027400-ENSCHAG00000027413
12	20641080	T	G	4.14	2.1529	56.62	34.3628	intergenic_region	olfm1b-ppp1r26	ENSCHAG00000027400-ENSCHAG00000027413
12	20641115	G	T	4.89	2.54291	55.76	33.8409	intergenic_region	olfm1b-ppp1r26	ENSCHAG00000027400-ENSCHAG00000027413
12	20647681	G	A	6.53	3.39575	59.67	36.2139	upstream_gene_variant	ppp1r26	ENSCHAG00000027413
12	20647896	T	G	5.84	3.03694	61	37.0211	upstream_gene_variant	ppp1r26	ENSCHAG00000027413
12	20671560	G	A	8.8	4.57621	67	40.6625	upstream_gene_variant	dipk1b	ENSCHAG00000027416
12	20671570	G	T	8.56	4.4514	63.5	38.5383	upstream_gene_variant	dipk1b	ENSCHAG00000027416
12	20671676	G	T	6.44	3.34895	62.4	37.8707	upstream_gene_variant	dipk1b	ENSCHAG00000027416
12	20671921	T	C	13.29	6.91111	56.05	34.0169	upstream_gene_variant	dipk1b	ENSCHAG00000027416
12	20671957	T	A	17.62	9.16281	53.25	32.3176	upstream_gene_variant	dipk1b	ENSCHAG00000027416
12	20672175	A	G	8.25	4.29019	52.07	31.6014	upstream_gene_variant	dipk1b	ENSCHAG00000027416
12	20672231	G	C	8.34	4.337	53.72	32.6028	upstream_gene_variant	dipk1b	ENSCHAG00000027416
12	20672267	A	T	5.36	2.78733	55.99	33.9805	upstream_gene_variant	dipk1b	ENSCHAG00000027416
12	20672383	T	G	4.68	2.43371	62.61	37.9982	upstream_gene_variant	dipk1b	ENSCHAG00000027416
12	20674024	A	T	6.12	3.18254	52.15	31.65	intron_variant	agpat2	ENSCHAG00000027419
12	20675430	G	T	4.95	2.57412	57.97	35.1821	intron_variant	agpat2	ENSCHAG00000027419
12	20675513	C	T	8.84	4.59701	50.09	30.3997	intron_variant	agpat2	ENSCHAG00000027419
12	20676829	A	G	3.97	2.06449	54.28	32.9427	intron_variant	agpat2	ENSCHAG00000027419
12	20676834	G	A	4.81	2.50131	53.42	32.4207	intron_variant	agpat2	ENSCHAG00000027419
12	20677204	G	A	12.29	6.39109	53.13	32.2447	intron_variant	agpat2	ENSCHAG00000027419
12	20692439	C	A	5.94	3.08894	54.25	32.9245	downstream_gene_variant	agpat2	ENSCHAG00000027419
12	20806986	G	A	4.42	2.2985	50.12	30.418	downstream_gene_variant	lncRNA	ENSCHAG00000027442
12	20811441	A	T	15.76	8.19557	52.13	31.6378	upstream_gene_variant	lncRNA	ENSCHAG00000027442
12	20811905	G	A	13.86	7.20753	54.71	33.2036	upstream_gene_variant	lncRNA	ENSCHAG00000027442
12	20812251	C	G	8.07	4.19659	54.58	33.1247	upstream_gene_variant	lncRNA	ENSCHAG00000027442
12	20813446	A	G	13.38	6.95791	52.26	31.7167	upstream_gene_variant	lncRNA	ENSCHAG00000027442
12	20813966	G	A	6.05	3.14614	51.24	31.0977	upstream_gene_variant	lncRNA	ENSCHAG00000027442
12	20819499	T	C	7.84	4.07698	54.92	33.3311	intergenic_region	lncRNA-psmd5	ENSCHAG00000027442-ENSCHAG00000027446
12	20819699	C	T	9.14	4.75301	56.77	34.4539	intergenic_region	lncRNA-psmd5	ENSCHAG00000027442-ENSCHAG00000027446
12	20821109	T	C	6.57	3.41655	55.33	33.5799	intergenic_region	lncRNA-psmd5	ENSCHAG00000027442-ENSCHAG00000027446
12	20821167	C	T	5.22	2.71452	57.9	35.1397	intergenic_region	lncRNA-psmd5	ENSCHAG00000027442-ENSCHAG00000027446
12	20911785	T	C	6.05	3.14614	56.06	34.023	missense_variant	lrrc8aa	ENSCHAG00000027524
12	20915246	G	C	8.13	4.22779	51.12	31.0249	upstream_gene_variant	lrrc8aa	ENSCHAG00000027524
12	20917890	T	C	8.72	4.5346	58.41	35.4492	upstream_gene_variant	dnlz	ENSCHAG00000027525
12	20918568	A	G	2.2	1.14405	56.38	34.2172	upstream_gene_variant	dnlz	ENSCHAG00000027525
12	20956541	A	G	5.41	2.81333	50.71	30.776	intergenic_region	rapgef1b-lmx1ba	ENSCHAG00000027537-ENSCHAG00000027553
12	20956552	C	T	7.03	3.65577	50.18	30.4544	intergenic_region	rapgef1b-lmx1ba	ENSCHAG00000027537-ENSCHAG00000027553
12	21028891	C	T	4.31	2.2413	50.18	30.4544	intron_variant	lmx1ba	ENSCHAG00000027553
12	21031246	C	T	5.63	2.92773	51.92	31.5104	intron_variant	lmx1ba	ENSCHAG00000027553
12	21035125	C	A	6.65	3.45816	50.73	30.7882	upstream_gene_variant	lmx1ba	ENSCHAG00000027553
12	21035722	A	G	5.34	2.77693	53.04	32.1901	upstream_gene_variant	lmx1ba	ENSCHAG00000027553
12	21035821	G	C	10.04	5.22104	52.22	31.6925	upstream_gene_variant	lmx1ba	ENSCHAG00000027553
12	21036753	C	T	9.33	4.85182	51.44	31.2191	upstream_gene_variant	lmx1ba	ENSCHAG00000027553
12	21037746	A	C	6.2	3.22415	52.3	31.741	upstream_gene_variant	lmx1ba	ENSCHAG00000027553
12	21056591	T	A	8.59	4.467	50.96	30.9278	intron_variant	mvb12ba	ENSCHAG00000002360
12	21072489	G	T	8.72	4.5346	50.73	30.7882	intron_variant	mvb12ba	ENSCHAG00000002360
12	21163058	T	C	8.44	4.389	50.52	30.6607	intron_variant	PBX3	ENSCHAG00000002486
12	21165254	A	G	8.6	4.4722	50.93	30.9095	5_prime_UTR_variant	PBX3	ENSCHAG00000002486
12	21166101	C	T	5.35	2.78213	52.54	31.8867	upstream_gene_variant	PBX3	ENSCHAG00000002486
12	21166306	C	T	5.22	2.71452	51.56	31.2919	upstream_gene_variant	PBX3	ENSCHAG00000002486
12	21169232	C	T	9.62	5.00263	55.7	33.8045	upstream_gene_variant	PBX3	ENSCHAG00000002486
12	21169453	A	T	7.93	4.12379	55.76	33.8409	upstream_gene_variant	PBX3	ENSCHAG00000002486
12	21169742	C	A	8.36	4.3474	54.03	32.7909	upstream_gene_variant	PBX3	ENSCHAG00000002486
12	21170953	T	C	6.55	3.40615	53.72	32.6028	upstream_gene_variant	mapkap1	ENSCHAG00000003113
12	21176184	T	G	6.84	3.55696	57.68	35.0061	intron_variant	mapkap1	ENSCHAG00000003113
12	21176387	T	G	11.93	6.20388	50.35	30.5575	intron_variant	mapkap1	ENSCHAG00000003113
12	21203192	G	C	11.69	6.07907	50.56	30.685	intron_variant	mapkap1	ENSCHAG00000003113
12	21290129	C	T	5.22	2.71452	52.98	32.1537	intron_variant	zmp:0000000846	ENSCHAG00000003789
12	21290130	C	T	6.14	3.19294	52.72	31.9959	intron_variant	zmp:0000000846	ENSCHAG00000003789
12	21294613	A	T	2.84	1.47687	55.04	33.4039	intron_variant	zmp:0000000846	ENSCHAG00000003789
12	21759186	A	G	5.93	3.08374	55.87	33.9076	upstream_gene_variant	PPP1CC	ENSCHAG00000012555
12	21759190	A	T	7.09	3.68697	54.81	33.2643	upstream_gene_variant	PPP1CC	ENSCHAG00000012555
12	21873017	C	A	6.27	3.26055	53.1	32.2265	intron_variant	rcl1	ENSCHAG00000014213
12	21875518	A	G	4.66	2.42331	51.17	31.0552	intron_variant	rcl1	ENSCHAG00000014213
12	22223860	C	T	6.77	3.52056	50.45	30.6182	intron_variant	TRABD2A	ENSCHAG00000021321
12	22234545	C	T	6.02	3.13054	51.03	30.9702	intron_variant	TRABD2A	ENSCHAG00000021321
12	23209949	C	G	4.03	2.09569	55.7	33.8045	intron_variant	fbxw2	ENSCHAG00000003600
12	23211895	C	T	7.52	3.91058	54.76	33.234	upstream_gene_variant	fbxw2	ENSCHAG00000003600
12	23337100	G	A	2.64	1.37286	53.95	32.7424	intergenic_region	lncRNA-lncRNA	ENSCHAG00000004850-ENSCHAG00000004856
12	23337141	G	A	3.48	1.80968	51.51	31.2616	intergenic_region	lncRNA-lncRNA	ENSCHAG00000004850-ENSCHAG00000004856
12	23337172	G	C	3.07	1.59647	50.9	30.8913	intergenic_region	lncRNA-lncRNA	ENSCHAG00000004850-ENSCHAG00000004856
12	25450504	A	T	5.02	2.61052	51.25	31.1038	downstream_gene_variant	PPTC7	ENSCHAG00000004528
12	25450526	G	A	5.53	2.87573	50.35	30.5575	downstream_gene_variant	PPTC7	ENSCHAG00000004528
13	5724347	A	G	54.35	28.2633	9.96	6.04475	intron_variant	PTK7	ENSCHAG00000021574
13	5752250	C	G	60.28	31.347	10.98	6.66379	upstream_gene_variant	PTK7	ENSCHAG00000021574
13	5752311	C	T	51.44	26.75	11.98	7.27069	upstream_gene_variant	PTK7	ENSCHAG00000021574
13	5759280	C	A	59.74	31.0662	11.81	7.16752	intron_variant	PTK7	ENSCHAG00000021574
13	5766977	C	T	61.14	31.7942	15.31	9.29168	splice_region_variant&synonymous_variant	PTK7	ENSCHAG00000021574
13	5773965	A	G	50.81	26.4224	15.51	9.41306	upstream_gene_variant	SRF	ENSCHAG00000022892
13	5776923	G	A	63.85	33.2035	14.21	8.62409	downstream_gene_variant	PTK7	ENSCHAG00000021574
13	5777478	A	T	63.53	33.0371	15.54	9.43127	downstream_gene_variant	PTK7	ENSCHAG00000021574
13	5779798	C	T	65.4	34.0095	11.66	7.07648	intron_variant	SRF	ENSCHAG00000022892
13	5781563	C	T	63.81	33.1827	15.05	9.13388	intron_variant	SRF	ENSCHAG00000022892
13	5787794	T	G	67.94	35.3304	18.48	11.2156	downstream_gene_variant	SRF	ENSCHAG00000022892
13	5791128	T	A	60.82	31.6278	14.34	8.70298	intergenic_region	SRF-rmdn2	ENSCHAG00000022892-ENSCHAG00000022906
13	5793228	A	G	68.92	35.84	12.35	7.49525	intergenic_region	SRF-rmdn2	ENSCHAG00000022892-ENSCHAG00000022906
13	5800724	C	T	87.97	45.7465	20.4	12.3808	intergenic_region	SRF-rmdn2	ENSCHAG00000022892-ENSCHAG00000022906
13	5804294	G	A	77.6	40.3538	17.27	10.4812	intergenic_region	SRF-rmdn2	ENSCHAG00000022892-ENSCHAG00000022906
13	5806703	A	T	76.39	39.7246	15.43	9.36451	intergenic_region	SRF-rmdn2	ENSCHAG00000022892-ENSCHAG00000022906
13	5810707	A	T	63.63	33.0891	9.22	5.59564	downstream_gene_variant	rmdn2	ENSCHAG00000022906
13	5810897	A	T	73.67	38.3101	11.76	7.13717	downstream_gene_variant	rmdn2	ENSCHAG00000022906
13	5811489	A	T	55.3	28.7573	14	8.49664	downstream_gene_variant	rmdn2	ENSCHAG00000022906
13	5811490	T	A	53.67	27.9097	14.15	8.58767	downstream_gene_variant	rmdn2	ENSCHAG00000022906
13	5814323	T	G	56.66	29.4645	12.3	7.4649	intron_variant	rmdn2	ENSCHAG00000022906
13	19664381	C	T	51.68	26.8748	19.92	12.0895	upstream_gene_variant	CBLN3	ENSCHAG00000011615
13	19666058	G	A	60.9	31.6694	20.92	12.6964	5_prime_UTR_variant	CBLN3	ENSCHAG00000011615
13	19666093	A	G	53.07	27.5976	15.32	9.29775	5_prime_UTR_premature_start_codon_gain_variant	CBLN3	ENSCHAG00000011615
13	19666322	A	G	58.41	30.3746	22.58	13.7039	missense_variant	CBLN3	ENSCHAG00000011615
13	19666513	G	A	65.59	34.1083	25.91	15.7248	missense_variant	CBLN3	ENSCHAG00000011615
13	19666663	T	G	97.22	50.5567	40.14	24.3611	missense_variant	CBLN3	ENSCHAG00000011615
13	19666671	T	A	91.67	47.6706	38.63	23.4446	missense_variant	CBLN3	ENSCHAG00000011615
13	19666672	G	T	91.53	47.5978	37.29	22.6314	missense_variant	CBLN3	ENSCHAG00000011615
13	19667044	G	C	86.75	45.112	22.98	13.9466	missense_variant	CBLN3	ENSCHAG00000011615
13	19667152	T	A	87.31	45.4033	24.61	14.9359	missense_variant	CBLN3	ENSCHAG00000011615
13	19667154	T	A	87.8	45.6581	24.32	14.7599	stop_gained	CBLN3	ENSCHAG00000011615
13	19667480	T	A	50.21	26.1104	13.61	8.25994	3_prime_UTR_variant	CBLN3	ENSCHAG00000011615
16	3667538	C	A	56.71	29.4905	28.92	17.5516	missense_variant	ITLN1	ENSCHAG00000023334
16	3667539	G	C	57.17	29.7297	30.44	18.4741	missense_variant	ITLN1	ENSCHAG00000023334
16	3668158	A	G	47.86	24.8883	30.3	18.3891	intron_variant	ITLN1	ENSCHAG00000023334
16	14143224	A	G	51.84	26.958	13.24	8.03539	intron_variant	COG5	ENSCHAG00000003909
16	14160303	G	A	50.06	26.0324	18.9	11.4705	intron_variant	COG5	ENSCHAG00000003909
16	14163501	T	C	51.52	26.7916	11.56	7.01579	intron_variant	COG5	ENSCHAG00000003909
16	14164286	G	A	65.43	34.0251	10.93	6.63344	intron_variant	COG5	ENSCHAG00000003909
16	14166272	A	T	50.8	26.4172	8.9	5.40143	intron_variant	COG5	ENSCHAG00000003909
16	14171945	C	T	55.17	28.6897	9.28	5.63206	intron_variant	COG5	ENSCHAG00000003909
16	14174228	G	A	52.25	27.1712	12.59	7.6409	intron_variant	COG5	ENSCHAG00000003909
16	14174357	C	T	57.7	30.0054	11.54	7.00366	intron_variant	COG5	ENSCHAG00000003909
16	14174371	C	T	54.68	28.4349	11.81	7.16752	intron_variant	COG5	ENSCHAG00000003909
16	14174459	G	A	51.88	26.9788	10.67	6.47565	intron_variant	COG5	ENSCHAG00000003909
16	14174460	T	A	51.43	26.7448	10.83	6.57275	intron_variant	COG5	ENSCHAG00000003909
16	14174633	A	G	53.63	27.8889	13.86	8.41167	intron_variant	COG5	ENSCHAG00000003909
16	14175786	C	T	54.76	28.4765	11.3	6.858	intron_variant	COG5	ENSCHAG00000003909
16	14176173	G	C	50.09	26.048	13.57	8.23567	intron_variant	COG5	ENSCHAG00000003909
16	14176374	T	C	50.65	26.3392	12.89	7.82297	intron_variant	COG5	ENSCHAG00000003909
16	14176997	G	A	52.11	27.0984	11.58	7.02793	intron_variant	COG5	ENSCHAG00000003909
16	14177519	A	C	50.2	26.1052	12.55	7.61663	intron_variant	COG5	ENSCHAG00000003909
16	14181090	A	G	51.19	26.62	12.46	7.56201	upstream_gene_variant	gpr22a	ENSCHAG00000004711
16	14181846	A	G	51.6	26.8332	9.59	5.8202	upstream_gene_variant	gpr22a	ENSCHAG00000004711
16	14181870	G	A	52.81	27.4624	9.75	5.9173	upstream_gene_variant	gpr22a	ENSCHAG00000004711
16	14181922	G	A	52.3	27.1972	9.97	6.05082	upstream_gene_variant	gpr22a	ENSCHAG00000004711
16	14186210	C	T	53.3	27.7173	10.4	6.31179	intron_variant	COG5	ENSCHAG00000003909
16	14190064	T	A	51.74	26.906	10.55	6.40282	downstream_gene_variant	gpr22a	ENSCHAG00000004711
16	14190984	C	T	53.51	27.8265	7.11	4.31508	downstream_gene_variant	gpr22a	ENSCHAG00000004711
16	14194491	T	A	53.59	27.8681	11.08	6.72448	intron_variant	COG5	ENSCHAG00000003909
16	14194811	T	C	52.96	27.5404	10.92	6.62738	intron_variant	COG5	ENSCHAG00000003909
16	14194815	T	G	54.04	28.1021	11.24	6.82158	intron_variant	COG5	ENSCHAG00000003909
16	14197341	G	T	50.92	26.4796	12.53	7.60449	upstream_gene_variant	dus4l	ENSCHAG00000004743
16	14197402	G	A	53.95	28.0553	14.41	8.74547	upstream_gene_variant	dus4l	ENSCHAG00000004743
16	14197627	C	A	52.2	27.1452	13.58	8.24174	upstream_gene_variant	dus4l	ENSCHAG00000004743
16	14199586	G	C	51.87	26.9736	11.58	7.02793	upstream_gene_variant	dus4l	ENSCHAG00000004743
16	14200420	T	G	54.01	28.0865	10.63	6.45137	5_prime_UTR_variant	dus4l	ENSCHAG00000004743
16	14200483	T	C	56.32	29.2877	11.04	6.7002	5_prime_UTR_variant	dus4l	ENSCHAG00000004743
16	14200756	G	A	57.98	30.151	10.78	6.54241	5_prime_UTR_variant	dus4l	ENSCHAG00000004743
16	14203336	G	A	51.88	26.9788	11.84	7.18573	3_prime_UTR_variant	dus4l	ENSCHAG00000004743
16	14207282	T	C	57.76	30.0366	14.33	8.69691	downstream_gene_variant	dus4l	ENSCHAG00000004743
16	14209708	G	C	54.69	28.4401	11.07	6.71841	downstream_gene_variant	bcap29	ENSCHAG00000004827
16	14209934	T	C	55.76	28.9965	9.65	5.85661	downstream_gene_variant	bcap29	ENSCHAG00000004827
16	14210239	T	A	62.65	32.5795	13.03	7.90794	downstream_gene_variant	bcap29	ENSCHAG00000004827
16	14210303	A	G	52.95	27.5352	13.62	8.26601	downstream_gene_variant	bcap29	ENSCHAG00000004827
16	14213989	A	C	53.02	27.5716	12.55	7.61663	missense_variant	slco1c1	ENSCHAG00000004880
16	14215355	T	C	51.09	26.568	12.54	7.61056	intron_variant	slco1c1	ENSCHAG00000004880
16	14216676	T	C	50.68	26.3548	11.32	6.87014	intron_variant	slco1c1	ENSCHAG00000004880
16	14217457	A	C	56.6	29.4333	10.65	6.46351	intron_variant	slco1c1	ENSCHAG00000004880
16	14217458	T	A	56.92	29.5997	10.6	6.43317	intron_variant	slco1c1	ENSCHAG00000004880
16	14217471	A	C	57.27	29.7817	10.52	6.38461	intron_variant	slco1c1	ENSCHAG00000004880
16	14217945	A	T	53.9	28.0293	12.7	7.70766	intron_variant	slco1c1	ENSCHAG00000004880
16	14217959	T	C	50.17	26.0896	13.28	8.05967	intron_variant	slco1c1	ENSCHAG00000004880
16	14218948	T	A	51.21	26.6304	12.36	7.50132	intron_variant	slco1c1	ENSCHAG00000004880
16	14220726	T	C	54.29	28.2321	11.91	7.22821	intron_variant	slco1c1	ENSCHAG00000004880
16	14221012	A	G	56.32	29.2877	10.43	6.32999	intron_variant	slco1c1	ENSCHAG00000004880
16	14221034	C	A	53.53	27.8369	12.24	7.42849	intron_variant	slco1c1	ENSCHAG00000004880
16	14221811	G	A	54.33	28.2529	10.64	6.45744	intron_variant	slco1c1	ENSCHAG00000004880
16	14231611	C	A	58.47	30.4058	8.95	5.43178	upstream_gene_variant	slco1c1	ENSCHAG00000004880
16	14233822	C	T	53.54	27.8421	9.01	5.46819	intergenic_region	slco1c1-pde3a	ENSCHAG00000004880-ENSCHAG00000005408
16	14247315	T	G	50.16	26.0844	12.13	7.36173	intron_variant	pde3a	ENSCHAG00000005408
16	14256478	G	T	56.92	29.5997	7.73	4.69136	intron_variant	pde3a	ENSCHAG00000005408
16	23945967	G	A	66.57	34.618	14.94	9.06712	missense_variant	golgb1	ENSCHAG00000017197
16	23946313	G	A	60.61	31.5186	14.9	9.04285	missense_variant	golgb1	ENSCHAG00000017197
16	23946368	T	C	60.46	31.4406	20	12.1381	synonymous_variant	golgb1	ENSCHAG00000017197
16	23946545	G	T	67.24	34.9664	17.39	10.554	synonymous_variant	golgb1	ENSCHAG00000017197
16	23946761	G	A	70.03	36.4172	19.33	11.7314	synonymous_variant	golgb1	ENSCHAG00000017197
16	23947144	T	C	63.72	33.1359	20.46	12.4172	missense_variant	golgb1	ENSCHAG00000017197
16	23947171	G	A	64.28	33.4271	19.73	11.9742	missense_variant	golgb1	ENSCHAG00000017197
16	23947286	C	G	66.45	34.5556	15.98	9.6983	synonymous_variant	golgb1	ENSCHAG00000017197
16	23947349	C	T	74.61	38.799	16.23	9.85003	synonymous_variant	golgb1	ENSCHAG00000017197
16	23947477	G	A	59.06	30.7126	21.16	12.8421	missense_variant	golgb1	ENSCHAG00000017197
16	23947949	T	G	54.81	28.5025	16.54	10.0382	missense_variant	golgb1	ENSCHAG00000017197
16	23948018	A	G	66.8	34.7376	17.22	10.4509	synonymous_variant	golgb1	ENSCHAG00000017197
16	23948108	A	C	50.75	26.3912	18.53	11.2459	missense_variant	golgb1	ENSCHAG00000017197
16	23948371	A	C	59.58	30.983	13.24	8.03539	missense_variant	golgb1	ENSCHAG00000017197
16	23948416	A	T	53.27	27.7017	13.89	8.42988	missense_variant	golgb1	ENSCHAG00000017197
16	23948961	C	T	67.66	35.1848	15.71	9.53444	synonymous_variant	golgb1	ENSCHAG00000017197
16	23949070	A	G	50.12	26.0636	15.54	9.43127	intron_variant	golgb1	ENSCHAG00000017197
16	23949301	C	T	61.45	31.9554	17.31	10.5055	intron_variant	golgb1	ENSCHAG00000017197
16	23951183	A	G	74.29	38.6325	17.36	10.5358	missense_variant	golgb1	ENSCHAG00000017197
16	23951203	T	C	61.02	31.7318	13.72	8.3267	splice_region_variant&synonymous_variant	golgb1	ENSCHAG00000017197
16	23951227	G	T	70.24	36.5265	19.33	11.7314	intron_variant	golgb1	ENSCHAG00000017197
16	23951250	A	G	68.23	35.4812	15.74	9.55265	intron_variant	golgb1	ENSCHAG00000017197
16	23951255	G	C	66.07	34.358	15.55	9.43733	intron_variant	golgb1	ENSCHAG00000017197
16	23951258	A	T	65.96	34.3008	15.21	9.23099	intron_variant	golgb1	ENSCHAG00000017197
16	23951268	T	G	63.52	33.0319	14.06	8.53305	intron_variant	golgb1	ENSCHAG00000017197
16	23951277	T	G	58.67	30.5098	13.89	8.42988	intron_variant	golgb1	ENSCHAG00000017197
16	23951335	T	G	51.25	26.6512	15.55	9.43733	intron_variant	golgb1	ENSCHAG00000017197
16	23953343	A	C	51.49	26.776	9.76	5.92337	upstream_gene_variant	hcls1	ENSCHAG00000017216
16	23953753	G	A	65.4	34.0095	15.13	9.18244	upstream_gene_variant	hcls1	ENSCHAG00000017216
16	23953978	G	A	55.03	28.6169	11.39	6.91262	upstream_gene_variant	hcls1	ENSCHAG00000017216
16	23954091	C	T	57.59	29.9482	17.31	10.5055	upstream_gene_variant	hcls1	ENSCHAG00000017216
16	23955167	T	C	61.43	31.945	13.76	8.35098	3_prime_UTR_variant	golgb1	ENSCHAG00000017197
16	23958059	C	T	57.88	30.099	10.33	6.2693	synonymous_variant	hcls1	ENSCHAG00000017216
16	23958226	T	C	56.63	29.4489	14.8	8.98216	downstream_gene_variant	golgb1	ENSCHAG00000017197
16	23958770	G	A	62.5	32.5015	17.24	10.463	downstream_gene_variant	golgb1	ENSCHAG00000017197
16	23959258	G	A	56.83	29.5529	11.88	7.21	missense_variant	hcls1	ENSCHAG00000017216
16	23959286	G	T	55.54	28.8821	13.26	8.04753	synonymous_variant	hcls1	ENSCHAG00000017216
16	23959319	C	G	57.5	29.9014	13.32	8.08394	missense_variant	hcls1	ENSCHAG00000017216
16	23962990	G	A	62.83	32.6731	10.09	6.12365	3_prime_UTR_variant	hcls1	ENSCHAG00000017216
16	23963889	C	A	51.06	26.5524	13.08	7.93829	3_prime_UTR_variant	hcls1	ENSCHAG00000017216
16	23963939	G	A	55.99	29.1161	18.59	11.2823	3_prime_UTR_variant	hcls1	ENSCHAG00000017216
16	23963953	A	G	60.42	31.4198	19.64	11.9196	3_prime_UTR_variant	hcls1	ENSCHAG00000017216
16	23963959	A	T	64.78	33.6871	22	13.3519	3_prime_UTR_variant	hcls1	ENSCHAG00000017216
16	23964037	T	C	71.3	37.0777	18.3	11.1063	3_prime_UTR_variant	llph	ENSCHAG00000017286
16	23964155	T	C	54.06	28.1125	9.49	5.75951	3_prime_UTR_variant	llph	ENSCHAG00000017286
16	23964475	A	G	55.61	28.9185	11.13	6.75483	splice_region_variant&intron_variant	llph	ENSCHAG00000017286
16	23964573	G	C	81.89	42.5847	21.11	12.8117	upstream_gene_variant	lncRNA	ENSCHAG00000017291
16	23964624	T	C	62.21	32.3507	12.94	7.85332	upstream_gene_variant	lncRNA	ENSCHAG00000017291
16	23964789	A	G	52.72	27.4156	10.59	6.4271	synonymous_variant	llph	ENSCHAG00000017286
16	23965056	A	T	76.21	39.631	19.51	11.8407	5_prime_UTR_variant	llph	ENSCHAG00000017286
16	23965061	A	T	74.93	38.9654	20.45	12.4112	5_prime_UTR_variant	llph	ENSCHAG00000017286
16	23965131	T	C	65.73	34.1811	9.61	5.83233	5_prime_UTR_premature_start_codon_gain_variant	llph	ENSCHAG00000017286
16	23965176	A	G	64.17	33.3699	9.11	5.52888	5_prime_UTR_variant	llph	ENSCHAG00000017286
16	23965218	C	T	58.46	30.4006	7.73	4.69136	5_prime_UTR_variant	llph	ENSCHAG00000017286
16	23965228	C	A	60.57	31.4978	7.47	4.53356	5_prime_UTR_variant	llph	ENSCHAG00000017286
16	23965231	C	A	57.55	29.9274	7.03	4.26652	5_prime_UTR_premature_start_codon_gain_variant	llph	ENSCHAG00000017286
16	23965242	T	C	60.26	31.3366	6.83	4.14514	5_prime_UTR_variant	llph	ENSCHAG00000017286
16	23965253	A	G	52.33	27.2128	6.79	4.12087	5_prime_UTR_variant	llph	ENSCHAG00000017286
16	23965258	T	G	60.54	31.4822	6.37	3.86597	5_prime_UTR_variant	llph	ENSCHAG00000017286
16	23965795	A	T	50.21	26.1104	7.52	4.56391	upstream_gene_variant	llph	ENSCHAG00000017286
16	23965797	A	T	50.07	26.0376	7.78	4.7217	upstream_gene_variant	llph	ENSCHAG00000017286
16	23965992	A	C	51.81	26.9424	6.75	4.09659	upstream_gene_variant	llph	ENSCHAG00000017286
16	23965998	T	C	50.51	26.2664	6.63	4.02376	upstream_gene_variant	llph	ENSCHAG00000017286
16	23966424	T	C	56.9	29.5893	17.65	10.7118	upstream_gene_variant	llph	ENSCHAG00000017286
16	23966439	C	T	59.59	30.9882	19.76	11.9924	upstream_gene_variant	llph	ENSCHAG00000017286
16	23966483	T	A	66.73	34.7012	19.54	11.8589	upstream_gene_variant	llph	ENSCHAG00000017286
16	23966501	G	A	64.04	33.3023	20.66	12.5386	upstream_gene_variant	llph	ENSCHAG00000017286
16	23971970	A	C	74.32	38.6481	22.47	13.6371	intron_variant	lncRNA	ENSCHAG00000017291
16	23972330	G	C	53.71	27.9305	18.78	11.3976	intron_variant	lncRNA	ENSCHAG00000017291
17	18568326	C	A	51.8	26.9372	6.64	4.02983	intergenic_region	klf6a-fzd8a	ENSCHAG00000009563-ENSCHAG00000009573
17	18568382	A	C	50.41	26.2144	7.1	4.30901	intergenic_region	klf6a-fzd8a	ENSCHAG00000009563-ENSCHAG00000009573
17	18568598	C	T	51.44	26.75	9.71	5.89302	intergenic_region	klf6a-fzd8a	ENSCHAG00000009563-ENSCHAG00000009573
17	18574418	T	C	55.05	28.6273	7.15	4.33935	intergenic_region	klf6a-fzd8a	ENSCHAG00000009563-ENSCHAG00000009573
17	18575057	G	T	53.33	27.7329	7.56	4.58818	intergenic_region	klf6a-fzd8a	ENSCHAG00000009563-ENSCHAG00000009573
17	18576350	C	G	50.19	26.1	7.34	4.45466	intergenic_region	klf6a-fzd8a	ENSCHAG00000009563-ENSCHAG00000009573
17	18576978	G	C	53.53	27.8369	7.76	4.70956	intergenic_region	klf6a-fzd8a	ENSCHAG00000009563-ENSCHAG00000009573
17	18577061	C	G	51.01	26.5264	7.45	4.52142	intergenic_region	klf6a-fzd8a	ENSCHAG00000009563-ENSCHAG00000009573
17	18577062	T	C	51.66	26.8644	7.48	4.53963	intergenic_region	klf6a-fzd8a	ENSCHAG00000009563-ENSCHAG00000009573
17	18577381	A	G	58.79	30.5722	7.07	4.2908	intergenic_region	klf6a-fzd8a	ENSCHAG00000009563-ENSCHAG00000009573
17	18578139	T	A	53.13	27.6288	3.89	2.36085	intergenic_region	klf6a-fzd8a	ENSCHAG00000009563-ENSCHAG00000009573
17	18578253	G	T	51.94	27.01	8.79	5.33467	intergenic_region	klf6a-fzd8a	ENSCHAG00000009563-ENSCHAG00000009573
17	18578295	C	T	55.65	28.9393	8.36	5.07371	intergenic_region	klf6a-fzd8a	ENSCHAG00000009563-ENSCHAG00000009573
17	18578920	T	G	58.16	30.2446	8.75	5.3104	intergenic_region	klf6a-fzd8a	ENSCHAG00000009563-ENSCHAG00000009573
17	18580294	A	G	56.77	29.5217	10.91	6.62131	intergenic_region	klf6a-fzd8a	ENSCHAG00000009563-ENSCHAG00000009573
17	18580301	C	G	55.12	28.6637	10.29	6.24503	intergenic_region	klf6a-fzd8a	ENSCHAG00000009563-ENSCHAG00000009573
17	18580521	A	G	59.17	30.7698	10.79	6.54848	intergenic_region	klf6a-fzd8a	ENSCHAG00000009563-ENSCHAG00000009573
17	18580736	A	G	59.18	30.775	10.63	6.45137	intergenic_region	klf6a-fzd8a	ENSCHAG00000009563-ENSCHAG00000009573
17	18580950	T	C	58.76	30.5566	10.03	6.08723	intergenic_region	klf6a-fzd8a	ENSCHAG00000009563-ENSCHAG00000009573
17	18581435	G	A	63.98	33.2711	10.1	6.12972	intergenic_region	klf6a-fzd8a	ENSCHAG00000009563-ENSCHAG00000009573
17	18581467	G	T	66.86	34.7688	11	6.67593	intergenic_region	klf6a-fzd8a	ENSCHAG00000009563-ENSCHAG00000009573
17	18581744	T	C	55.15	28.6793	7.15	4.33935	intergenic_region	klf6a-fzd8a	ENSCHAG00000009563-ENSCHAG00000009573
17	18582102	G	T	52.05	27.0672	5.11	3.10127	intergenic_region	klf6a-fzd8a	ENSCHAG00000009563-ENSCHAG00000009573
17	18583303	T	C	53.37	27.7537	7.39	4.48501	upstream_gene_variant	fzd8a	ENSCHAG00000009573
17	18584306	A	T	57.59	29.9482	9.56	5.80199	upstream_gene_variant	fzd8a	ENSCHAG00000009573
17	18584598	A	G	53.52	27.8317	9.44	5.72916	upstream_gene_variant	fzd8a	ENSCHAG00000009573
17	18584749	T	A	60.25	31.3314	10	6.06903	upstream_gene_variant	fzd8a	ENSCHAG00000009573
17	18585196	C	T	63.95	33.2555	10.41	6.31786	upstream_gene_variant	fzd8a	ENSCHAG00000009573
17	18586617	T	C	54.48	28.3309	8.75	5.3104	upstream_gene_variant	fzd8a	ENSCHAG00000009573
17	18586688	A	G	59.31	30.8426	11.91	7.22821	upstream_gene_variant	fzd8a	ENSCHAG00000009573
17	18586695	T	C	57.85	30.0834	11.91	7.22821	upstream_gene_variant	fzd8a	ENSCHAG00000009573
17	18586751	T	G	60.12	31.2638	11.68	7.08862	upstream_gene_variant	fzd8a	ENSCHAG00000009573
17	18586899	A	G	70.72	36.7761	10.11	6.13578	upstream_gene_variant	fzd8a	ENSCHAG00000009573
17	18587098	A	C	54.41	28.2945	9.49	5.75951	upstream_gene_variant	fzd8a	ENSCHAG00000009573
17	18587180	C	T	58.53	30.437	9.37	5.68668	upstream_gene_variant	fzd8a	ENSCHAG00000009573
17	18587188	A	G	58.78	30.567	8.55	5.18902	upstream_gene_variant	fzd8a	ENSCHAG00000009573
17	18587235	G	T	63.09	32.8083	8.15	4.94626	upstream_gene_variant	fzd8a	ENSCHAG00000009573
17	18587352	A	T	54.19	28.1801	6.82	4.13908	upstream_gene_variant	fzd8a	ENSCHAG00000009573
17	18589878	A	T	65.92	34.2799	9.7	5.88695	downstream_gene_variant	fzd8a	ENSCHAG00000009573
17	18592950	G	A	55.8	29.0173	8.93	5.41964	downstream_gene_variant	fzd8a	ENSCHAG00000009573
17	18593451	T	A	60.13	31.269	7.01	4.25439	downstream_gene_variant	fzd8a	ENSCHAG00000009573
17	18593506	C	A	65.39	34.0043	7.81	4.73991	downstream_gene_variant	fzd8a	ENSCHAG00000009573
17	18593610	T	C	61.1	31.7734	7.47	4.53356	downstream_gene_variant	fzd8a	ENSCHAG00000009573
17	18593673	A	T	58.04	30.1822	6.08	3.68997	downstream_gene_variant	fzd8a	ENSCHAG00000009573
17	18594661	A	G	56.91	29.5945	7.43	4.50929	upstream_gene_variant	FUCL	ENSCHAG00000009580
17	18594702	G	A	56.11	29.1785	8.66	5.25578	upstream_gene_variant	FUCL	ENSCHAG00000009580
17	18594815	A	C	62.51	32.5067	8.99	5.45605	upstream_gene_variant	FUCL	ENSCHAG00000009580
17	18594911	C	T	65.21	33.9107	9.48	5.75344	upstream_gene_variant	FUCL	ENSCHAG00000009580
17	18597625	T	C	67.67	35.19	12.14	7.3678	upstream_gene_variant	FUCL	ENSCHAG00000009580
17	18598151	A	G	60.61	31.5186	7.84	4.75812	upstream_gene_variant	FUCL	ENSCHAG00000009580
17	18599274	G	T	53	27.5612	9.99	6.06296	5_prime_UTR_premature_start_codon_gain_variant	FUCL	ENSCHAG00000009580
17	18601188	G	C	63.73	33.1411	10.54	6.39675	downstream_gene_variant	FUCL	ENSCHAG00000009580
17	18601733	T	G	69.64	36.2144	9.61	5.83233	downstream_gene_variant	FUCL	ENSCHAG00000009580
17	18601811	G	A	62.08	32.2831	9.58	5.81413	downstream_gene_variant	FUCL	ENSCHAG00000009580
17	18602044	A	G	62.32	32.4079	8.17	4.95839	downstream_gene_variant	FUCL	ENSCHAG00000009580
17	18602052	C	G	63.63	33.0891	7.73	4.69136	downstream_gene_variant	FUCL	ENSCHAG00000009580
17	18602139	C	G	50.13	26.0688	2.28	1.38374	downstream_gene_variant	FUCL	ENSCHAG00000009580
17	18602987	A	C	59	30.6814	9.83	5.96585	downstream_gene_variant	FUCL	ENSCHAG00000009580
17	18603275	A	G	58.24	30.2862	8.13	4.93412	downstream_gene_variant	FUCL	ENSCHAG00000009580
17	18604491	T	C	50.15	26.0792	9.83	5.96585	downstream_gene_variant	FUCL	ENSCHAG00000009580
17	18604739	C	T	58.22	30.2758	9.64	5.85054	downstream_gene_variant	FUCL	ENSCHAG00000009580
17	18605361	T	C	60.63	31.529	8.41	5.10405	downstream_gene_variant	FUCL	ENSCHAG00000009580
17	18605559	T	A	60.27	31.3418	9.45	5.73523	downstream_gene_variant	FUCL	ENSCHAG00000009580
17	18606494	C	A	50.4	26.2092	7.84	4.75812	intergenic_region	FUCL-unannotated gene	ENSCHAG00000009580-ENSCHAG00000009593
17	18607158	G	T	65.69	34.1603	9.56	5.80199	intergenic_region	FUCL-unannotated gene	ENSCHAG00000009580-ENSCHAG00000009593
17	18607395	G	C	57.25	29.7713	10.81	6.56062	intergenic_region	FUCL-unannotated gene	ENSCHAG00000009580-ENSCHAG00000009593
17	18607482	T	C	58.36	30.3486	7.2	4.3697	intergenic_region	FUCL-unannotated gene	ENSCHAG00000009580-ENSCHAG00000009593
17	18607616	T	C	50.9	26.4692	8.23	4.99481	intergenic_region	FUCL-unannotated gene	ENSCHAG00000009580-ENSCHAG00000009593
17	18607641	T	C	59.92	31.1598	8.02	4.86736	intergenic_region	FUCL-unannotated gene	ENSCHAG00000009580-ENSCHAG00000009593
17	18607669	A	T	50.49	26.256	8.68	5.26791	intergenic_region	FUCL-unannotated gene	ENSCHAG00000009580-ENSCHAG00000009593
17	18607722	C	G	52.6	27.3532	8.26	5.01302	intergenic_region	FUCL-unannotated gene	ENSCHAG00000009580-ENSCHAG00000009593
17	18607806	C	A	55.13	28.6689	8.3	5.03729	intergenic_region	FUCL-unannotated gene	ENSCHAG00000009580-ENSCHAG00000009593
17	18608403	C	G	67.8	35.2576	12.63	7.66518	intergenic_region	FUCL-unannotated gene	ENSCHAG00000009580-ENSCHAG00000009593
17	18608559	T	G	61.49	31.9762	9.54	5.78985	intergenic_region	FUCL-unannotated gene	ENSCHAG00000009580-ENSCHAG00000009593
17	18608928	T	G	62.2	32.3455	9.7	5.88695	intergenic_region	FUCL-unannotated gene	ENSCHAG00000009580-ENSCHAG00000009593
17	18609089	A	T	57.06	29.6725	10.25	6.22075	intergenic_region	FUCL-unannotated gene	ENSCHAG00000009580-ENSCHAG00000009593
17	18609615	A	C	65.54	34.0823	6.31	3.82956	intergenic_region	FUCL-unannotated gene	ENSCHAG00000009580-ENSCHAG00000009593
17	18610821	C	T	51.24	26.646	6.16	3.73852	intergenic_region	FUCL-unannotated gene	ENSCHAG00000009580-ENSCHAG00000009593
17	18612549	G	C	51.43	26.7448	8.85	5.37109	intergenic_region	FUCL-unannotated gene	ENSCHAG00000009580-ENSCHAG00000009593
17	18612559	C	T	52.95	27.5352	7.72	4.68529	intergenic_region	FUCL-unannotated gene	ENSCHAG00000009580-ENSCHAG00000009593
17	18613062	G	A	52.99	27.556	8.77	5.32254	intergenic_region	FUCL-unannotated gene	ENSCHAG00000009580-ENSCHAG00000009593
17	18614376	T	C	55.83	29.0329	7.92	4.80667	intergenic_region	FUCL-unannotated gene	ENSCHAG00000009580-ENSCHAG00000009593
17	18614492	T	C	58.53	30.437	7.61	4.61853	intergenic_region	FUCL-unannotated gene	ENSCHAG00000009580-ENSCHAG00000009593
17	18615055	A	C	55.77	29.0017	8.08	4.90377	intergenic_region	FUCL-unannotated gene	ENSCHAG00000009580-ENSCHAG00000009593
17	18615363	C	A	50.75	26.3912	8.44	5.12226	intergenic_region	FUCL-unannotated gene	ENSCHAG00000009580-ENSCHAG00000009593
17	18615468	T	C	63.3	32.9175	7.12	4.32115	intergenic_region	FUCL-unannotated gene	ENSCHAG00000009580-ENSCHAG00000009593
17	18615632	A	G	61.66	32.0646	7.5	4.55177	intergenic_region	FUCL-unannotated gene	ENSCHAG00000009580-ENSCHAG00000009593
17	18616102	A	G	59.6	30.9934	4.41	2.67644	intergenic_region	FUCL-unannotated gene	ENSCHAG00000009580-ENSCHAG00000009593
17	18616185	T	C	51.2	26.6252	6.07	3.6839	intergenic_region	FUCL-unannotated gene	ENSCHAG00000009580-ENSCHAG00000009593
17	18616468	T	G	52.08	27.0828	8.17	4.95839	intergenic_region	FUCL-unannotated gene	ENSCHAG00000009580-ENSCHAG00000009593
17	18616594	A	C	60.24	31.3262	6.42	3.89631	intergenic_region	FUCL-unannotated gene	ENSCHAG00000009580-ENSCHAG00000009593
17	18616626	A	G	56.12	29.1837	9.12	5.53495	intergenic_region	FUCL-unannotated gene	ENSCHAG00000009580-ENSCHAG00000009593
17	18617317	T	G	53.94	28.0501	7.67	4.65494	intergenic_region	FUCL-unannotated gene	ENSCHAG00000009580-ENSCHAG00000009593
17	18617336	A	G	51.15	26.5992	7.7	4.67315	intergenic_region	FUCL-unannotated gene	ENSCHAG00000009580-ENSCHAG00000009593
17	18617527	T	C	51.33	26.6928	6.47	3.92666	intergenic_region	FUCL-unannotated gene	ENSCHAG00000009580-ENSCHAG00000009593
17	18617840	T	C	51.89	26.984	5.17	3.13769	intergenic_region	FUCL-unannotated gene	ENSCHAG00000009580-ENSCHAG00000009593
17	18619305	T	G	59.81	31.1026	8.4	5.09798	intergenic_region	FUCL-unannotated gene	ENSCHAG00000009580-ENSCHAG00000009593
17	18620847	C	G	58.75	30.5514	4.29	2.60361	downstream_gene_variant	unannotated gene	ENSCHAG00000009593
17	18621024	T	C	53.52	27.8317	5.6	3.39865	downstream_gene_variant	unannotated gene	ENSCHAG00000009593
17	18621645	A	T	62.56	32.5327	8.34	5.06157	downstream_gene_variant	unannotated gene	ENSCHAG00000009593
17	18622045	T	C	54.31	28.2425	8.1	4.91591	downstream_gene_variant	unannotated gene	ENSCHAG00000009593
17	18622153	C	T	58.59	30.4682	7.62	4.6246	downstream_gene_variant	unannotated gene	ENSCHAG00000009593
17	18622325	A	C	60.5	31.4614	8.02	4.86736	downstream_gene_variant	unannotated gene	ENSCHAG00000009593
17	18622561	G	A	58.65	30.4994	9.03	5.48033	downstream_gene_variant	unannotated gene	ENSCHAG00000009593
17	18622775	T	A	67.77	35.242	6.6	4.00556	downstream_gene_variant	unannotated gene	ENSCHAG00000009593
17	18622909	A	T	60.27	31.3418	8.56	5.19509	downstream_gene_variant	unannotated gene	ENSCHAG00000009593
17	18623127	G	A	57.26	29.7765	7.53	4.56998	downstream_gene_variant	unannotated gene	ENSCHAG00000009593
17	18623212	C	T	62.78	32.6471	6.62	4.01769	downstream_gene_variant	unannotated gene	ENSCHAG00000009593
17	18623597	G	C	67.98	35.3512	5.58	3.38652	downstream_gene_variant	unannotated gene	ENSCHAG00000009593
17	18623783	T	A	65.25	33.9315	8.73	5.29826	downstream_gene_variant	unannotated gene	ENSCHAG00000009593
17	18623784	T	A	65.67	34.1499	8.57	5.20115	downstream_gene_variant	unannotated gene	ENSCHAG00000009593
17	18624252	C	A	54.04	28.1021	7.4	4.49108	downstream_gene_variant	unannotated gene	ENSCHAG00000009593
17	18624410	G	A	55.84	29.0381	6.81	4.13301	downstream_gene_variant	unannotated gene	ENSCHAG00000009593
17	18624458	A	G	56.49	29.3761	8.45	5.12833	downstream_gene_variant	unannotated gene	ENSCHAG00000009593
17	18624821	A	C	67.21	34.9508	9.3	5.64419	downstream_gene_variant	unannotated gene	ENSCHAG00000009593
17	18625182	G	C	56.31	29.2825	7.5	4.55177	intron_variant	unannotated gene	ENSCHAG00000009593
17	18625798	C	A	55.81	29.0225	6.98	4.23618	missense_variant	unannotated gene	ENSCHAG00000009593
17	18626507	G	T	69.41	36.0948	8.29	5.03122	missense_variant	unannotated gene	ENSCHAG00000009593
17	18626632	C	T	61.79	32.1323	7.55	4.58211	missense_variant	unannotated gene	ENSCHAG00000009593
17	18626633	T	C	61.67	32.0698	7.7	4.67315	missense_variant	unannotated gene	ENSCHAG00000009593
17	18626655	C	A	64.89	33.7443	7.7	4.67315	upstream_gene_variant	unannotated gene	ENSCHAG00000009593
17	18626863	A	G	56.96	29.6205	10.41	6.31786	upstream_gene_variant	unannotated gene	ENSCHAG00000009593
17	18626943	G	T	55.97	29.1057	9.57	5.80806	upstream_gene_variant	unannotated gene	ENSCHAG00000009593
17	18627068	T	C	54.05	28.1073	6.81	4.13301	upstream_gene_variant	unannotated gene	ENSCHAG00000009593
17	18627304	T	C	52.95	27.5352	6.97	4.23011	upstream_gene_variant	unannotated gene	ENSCHAG00000009593
17	18629237	C	T	54.22	28.1957	7.05	4.27866	upstream_gene_variant	unannotated gene	ENSCHAG00000009593
17	18629303	G	T	63.77	33.1619	5.64	3.42293	upstream_gene_variant	unannotated gene	ENSCHAG00000009593
17	18629521	A	C	65.87	34.2539	6.19	3.75673	upstream_gene_variant	unannotated gene	ENSCHAG00000009593
17	18629585	T	A	72.99	37.9565	8.02	4.86736	upstream_gene_variant	unannotated gene	ENSCHAG00000009593
17	18630083	T	A	61.31	31.8826	6.19	3.75673	upstream_gene_variant	unannotated gene	ENSCHAG00000009593
17	18633663	A	G	50.29	26.152	8.13	4.93412	intergenic_region	unannotated gene-unannotated gene	ENSCHAG00000009593-ENSCHAG00000009606
17	18633818	T	A	52.48	27.2908	9.12	5.53495	intergenic_region	unannotated gene-unannotated gene	ENSCHAG00000009593-ENSCHAG00000009606
17	18636525	T	C	51.99	27.036	6.74	4.09052	intergenic_region	unannotated gene-unannotated gene	ENSCHAG00000009593-ENSCHAG00000009606
17	18637533	T	A	54.89	28.5441	6.63	4.02376	intergenic_region	unannotated gene-unannotated gene	ENSCHAG00000009593-ENSCHAG00000009606
17	18637873	C	T	64.63	33.6091	8.14	4.94019	intergenic_region	unannotated gene-unannotated gene	ENSCHAG00000009593-ENSCHAG00000009606
17	18637963	A	G	54.16	28.1645	8.26	5.01302	intergenic_region	unannotated gene-unannotated gene	ENSCHAG00000009593-ENSCHAG00000009606
17	18638226	G	A	59.88	31.139	8.79	5.33467	intergenic_region	unannotated gene-unannotated gene	ENSCHAG00000009593-ENSCHAG00000009606
17	18638426	C	T	62.85	32.6835	7.97	4.83701	intergenic_region	unannotated gene-unannotated gene	ENSCHAG00000009593-ENSCHAG00000009606
17	18639246	T	G	66.47	34.566	7.57	4.59425	intergenic_region	unannotated gene-unannotated gene	ENSCHAG00000009593-ENSCHAG00000009606
17	18639309	A	C	60.98	31.711	4.64	2.81603	intergenic_region	unannotated gene-unannotated gene	ENSCHAG00000009593-ENSCHAG00000009606
17	18639312	C	T	58.52	30.4318	5.44	3.30155	intergenic_region	unannotated gene-unannotated gene	ENSCHAG00000009593-ENSCHAG00000009606
17	18639434	T	A	56.48	29.3709	7.82	4.74598	intergenic_region	unannotated gene-unannotated gene	ENSCHAG00000009593-ENSCHAG00000009606
17	18639611	G	A	68.24	35.4864	6.22	3.77493	intergenic_region	unannotated gene-unannotated gene	ENSCHAG00000009593-ENSCHAG00000009606
17	18639612	A	T	67.59	35.1484	6.28	3.81135	intergenic_region	unannotated gene-unannotated gene	ENSCHAG00000009593-ENSCHAG00000009606
17	18640127	G	T	57.17	29.7297	7	4.24832	intergenic_region	unannotated gene-unannotated gene	ENSCHAG00000009593-ENSCHAG00000009606
17	18640152	C	A	57.48	29.891	8.07	4.8977	intergenic_region	unannotated gene-unannotated gene	ENSCHAG00000009593-ENSCHAG00000009606
17	18640225	T	G	57.2	29.7453	6.73	4.08445	intergenic_region	unannotated gene-unannotated gene	ENSCHAG00000009593-ENSCHAG00000009606
17	18640256	C	G	53.99	28.0761	6.18	3.75066	intergenic_region	unannotated gene-unannotated gene	ENSCHAG00000009593-ENSCHAG00000009606
17	18640266	T	A	54.25	28.2113	6.67	4.04804	intergenic_region	unannotated gene-unannotated gene	ENSCHAG00000009593-ENSCHAG00000009606
17	18640477	G	C	55.45	28.8353	7.88	4.78239	intergenic_region	unannotated gene-unannotated gene	ENSCHAG00000009593-ENSCHAG00000009606
17	18640510	T	A	63.31	32.9227	7.64	4.63674	intergenic_region	unannotated gene-unannotated gene	ENSCHAG00000009593-ENSCHAG00000009606
17	18640576	C	T	67.87	35.294	7.32	4.44253	intergenic_region	unannotated gene-unannotated gene	ENSCHAG00000009593-ENSCHAG00000009606
17	18640738	G	T	64.97	33.7859	6.49	3.9388	intergenic_region	unannotated gene-unannotated gene	ENSCHAG00000009593-ENSCHAG00000009606
17	18640769	T	G	54.93	28.5649	5.81	3.5261	intergenic_region	unannotated gene-unannotated gene	ENSCHAG00000009593-ENSCHAG00000009606
17	18641731	C	T	56.46	29.3605	7.25	4.40004	intergenic_region	unannotated gene-unannotated gene	ENSCHAG00000009593-ENSCHAG00000009606
17	18642898	G	A	66.13	34.3892	9.61	5.83233	intergenic_region	unannotated gene-unannotated gene	ENSCHAG00000009593-ENSCHAG00000009606
17	18642911	C	A	60.14	31.2742	8.58	5.20722	intergenic_region	unannotated gene-unannotated gene	ENSCHAG00000009593-ENSCHAG00000009606
17	18642940	G	A	58.12	30.2238	8.32	5.04943	intergenic_region	unannotated gene-unannotated gene	ENSCHAG00000009593-ENSCHAG00000009606
17	18642998	T	G	57.16	29.7245	7.93	4.81274	intergenic_region	unannotated gene-unannotated gene	ENSCHAG00000009593-ENSCHAG00000009606
17	18643504	C	A	63.7	33.1255	5.91	3.58679	intergenic_region	unannotated gene-unannotated gene	ENSCHAG00000009593-ENSCHAG00000009606
17	18643572	C	T	57.75	30.0314	7.28	4.41825	intergenic_region	unannotated gene-unannotated gene	ENSCHAG00000009593-ENSCHAG00000009606
17	18643582	T	A	55.21	28.7105	8.02	4.86736	intergenic_region	unannotated gene-unannotated gene	ENSCHAG00000009593-ENSCHAG00000009606
17	18645287	A	C	53.83	27.9929	9.62	5.8384	intergenic_region	unannotated gene-unannotated gene	ENSCHAG00000009593-ENSCHAG00000009606
17	18648277	G	T	62.09	32.2883	9.84	5.97192	intergenic_region	unannotated gene-unannotated gene	ENSCHAG00000009593-ENSCHAG00000009606
17	18649881	G	A	61.61	32.0386	7.26	4.40611	intergenic_region	unannotated gene-unannotated gene	ENSCHAG00000009593-ENSCHAG00000009606
17	18649930	A	G	59.57	30.9778	8.85	5.37109	intergenic_region	unannotated gene-unannotated gene	ENSCHAG00000009593-ENSCHAG00000009606
17	18651866	T	A	60.79	31.6122	9.6	5.82626	intergenic_region	unannotated gene-unannotated gene	ENSCHAG00000009593-ENSCHAG00000009606
17	18651867	A	G	60.99	31.7162	9.17	5.5653	intergenic_region	unannotated gene-unannotated gene	ENSCHAG00000009593-ENSCHAG00000009606
17	18652177	A	G	52.45	27.2752	7.74	4.69743	intergenic_region	unannotated gene-unannotated gene	ENSCHAG00000009593-ENSCHAG00000009606
17	18652566	T	A	53.57	27.8577	6.71	4.07232	intergenic_region	unannotated gene-unannotated gene	ENSCHAG00000009593-ENSCHAG00000009606
17	18652777	C	T	64.26	33.4167	6.09	3.69604	intergenic_region	unannotated gene-unannotated gene	ENSCHAG00000009593-ENSCHAG00000009606
17	18652793	T	C	60.21	31.3106	6.17	3.74459	intergenic_region	unannotated gene-unannotated gene	ENSCHAG00000009593-ENSCHAG00000009606
17	18654534	T	C	69.86	36.3288	6.54	3.96914	upstream_gene_variant	unannotated gene	ENSCHAG00000009606
17	18654674	G	A	58.03	30.177	5.39	3.2712	upstream_gene_variant	unannotated gene	ENSCHAG00000009606
17	18655142	G	C	63.11	32.8187	7.14	4.33328	upstream_gene_variant	unannotated gene	ENSCHAG00000009606
17	18658449	T	G	55.64	28.9341	8.39	5.09191	upstream_gene_variant	unannotated gene	ENSCHAG00000009606
17	18658594	T	G	51.66	26.8644	8.96	5.43785	upstream_gene_variant	unannotated gene	ENSCHAG00000009606
17	18664234	G	T	50.4	26.2092	7.65	4.6428	downstream_gene_variant	unannotated gene	ENSCHAG00000009606
17	18664274	C	T	57.13	29.7089	7.29	4.42432	downstream_gene_variant	unannotated gene	ENSCHAG00000009606
17	18669963	C	A	67.67	35.19	7.72	4.68529	intergenic_region	unannotated gene-CDH20	ENSCHAG00000009606-ENSCHAG00000009619
17	18670618	G	A	50.03	26.0168	6.59	3.99949	intergenic_region	unannotated gene-CDH20	ENSCHAG00000009606-ENSCHAG00000009619
17	18671147	C	A	55.57	28.8977	7.37	4.47287	intergenic_region	unannotated gene-CDH20	ENSCHAG00000009606-ENSCHAG00000009619
17	18675776	T	A	51.51	26.7864	3.29	1.99671	intergenic_region	unannotated gene-CDH20	ENSCHAG00000009606-ENSCHAG00000009619
17	18675813	G	C	60.87	31.6538	6.77	4.10873	intergenic_region	unannotated gene-CDH20	ENSCHAG00000009606-ENSCHAG00000009619
17	18675937	G	A	55.18	28.6949	6.71	4.07232	intergenic_region	unannotated gene-CDH20	ENSCHAG00000009606-ENSCHAG00000009619
17	18675983	T	C	51.99	27.036	6.57	3.98735	intergenic_region	unannotated gene-CDH20	ENSCHAG00000009606-ENSCHAG00000009619
17	18676011	A	G	53.87	28.0137	5.52	3.3501	intergenic_region	unannotated gene-CDH20	ENSCHAG00000009606-ENSCHAG00000009619
17	18676089	T	G	66.35	34.5036	7.51	4.55784	intergenic_region	unannotated gene-CDH20	ENSCHAG00000009606-ENSCHAG00000009619
17	18676131	G	A	54.01	28.0865	6.91	4.1937	intergenic_region	unannotated gene-CDH20	ENSCHAG00000009606-ENSCHAG00000009619
17	18677653	T	G	60.64	31.5342	7.71	4.67922	intergenic_region	unannotated gene-CDH20	ENSCHAG00000009606-ENSCHAG00000009619
17	18677844	T	C	55.93	29.0849	6.04	3.66569	intergenic_region	unannotated gene-CDH20	ENSCHAG00000009606-ENSCHAG00000009619
17	18677852	C	T	56.92	29.5997	6.97	4.23011	intergenic_region	unannotated gene-CDH20	ENSCHAG00000009606-ENSCHAG00000009619
17	18677946	C	A	60.55	31.4874	8.15	4.94626	intergenic_region	unannotated gene-CDH20	ENSCHAG00000009606-ENSCHAG00000009619
17	18678557	A	C	61.29	31.8722	8.5	5.15867	intergenic_region	unannotated gene-CDH20	ENSCHAG00000009606-ENSCHAG00000009619
17	18678755	G	A	56.13	29.1889	7.6	4.61246	intergenic_region	unannotated gene-CDH20	ENSCHAG00000009606-ENSCHAG00000009619
17	18678793	G	A	56.73	29.5009	7.46	4.52749	intergenic_region	unannotated gene-CDH20	ENSCHAG00000009606-ENSCHAG00000009619
17	18679352	A	C	58.98	30.671	6.9	4.18763	intergenic_region	unannotated gene-CDH20	ENSCHAG00000009606-ENSCHAG00000009619
17	18679480	A	G	54.01	28.0865	3.5	2.12416	intergenic_region	unannotated gene-CDH20	ENSCHAG00000009606-ENSCHAG00000009619
17	18679581	A	T	67.84	35.2784	6.72	4.07839	intergenic_region	unannotated gene-CDH20	ENSCHAG00000009606-ENSCHAG00000009619
17	18679664	T	G	60.38	31.399	7.73	4.69136	intergenic_region	unannotated gene-CDH20	ENSCHAG00000009606-ENSCHAG00000009619
17	18680759	G	T	62.15	32.3195	9.65	5.85661	intergenic_region	unannotated gene-CDH20	ENSCHAG00000009606-ENSCHAG00000009619
17	18680760	T	A	58.97	30.6658	8.62	5.2315	intergenic_region	unannotated gene-CDH20	ENSCHAG00000009606-ENSCHAG00000009619
17	18680809	C	T	64.27	33.4219	7.51	4.55784	intergenic_region	unannotated gene-CDH20	ENSCHAG00000009606-ENSCHAG00000009619
17	18680831	C	T	61.39	31.9242	9.41	5.71095	intergenic_region	unannotated gene-CDH20	ENSCHAG00000009606-ENSCHAG00000009619
17	18681101	G	T	58.21	30.2706	7.06	4.28473	intergenic_region	unannotated gene-CDH20	ENSCHAG00000009606-ENSCHAG00000009619
17	18681110	C	G	53.71	27.9305	6.69	4.06018	intergenic_region	unannotated gene-CDH20	ENSCHAG00000009606-ENSCHAG00000009619
17	18683154	T	A	56.85	29.5633	7.25	4.40004	intergenic_region	unannotated gene-CDH20	ENSCHAG00000009606-ENSCHAG00000009619
17	18683487	C	T	63.74	33.1463	7.32	4.44253	intergenic_region	unannotated gene-CDH20	ENSCHAG00000009606-ENSCHAG00000009619
17	18683493	T	C	67.58	35.1432	8.6	5.21936	intergenic_region	unannotated gene-CDH20	ENSCHAG00000009606-ENSCHAG00000009619
17	18683509	G	A	57.58	29.943	6.99	4.24225	intergenic_region	unannotated gene-CDH20	ENSCHAG00000009606-ENSCHAG00000009619
17	18683512	T	A	55.41	28.8145	7.62	4.6246	intergenic_region	unannotated gene-CDH20	ENSCHAG00000009606-ENSCHAG00000009619
17	18686902	C	T	55.77	29.0017	3.95	2.39727	intergenic_region	unannotated gene-CDH20	ENSCHAG00000009606-ENSCHAG00000009619
17	18689397	T	C	53.68	27.9149	5.42	3.28941	intergenic_region	unannotated gene-CDH20	ENSCHAG00000009606-ENSCHAG00000009619
17	18691745	C	G	56.19	29.2201	9.53	5.78378	intergenic_region	unannotated gene-CDH20	ENSCHAG00000009606-ENSCHAG00000009619
17	18691818	C	G	59.12	30.7438	8.98	5.44998	intergenic_region	unannotated gene-CDH20	ENSCHAG00000009606-ENSCHAG00000009619
17	18691840	C	G	60.23	31.321	6.02	3.65355	intergenic_region	unannotated gene-CDH20	ENSCHAG00000009606-ENSCHAG00000009619
17	18695764	C	A	61.69	32.0803	8.37	5.07977	intergenic_region	unannotated gene-CDH20	ENSCHAG00000009606-ENSCHAG00000009619
17	18695767	A	G	63.78	33.1671	8.33	5.0555	intergenic_region	unannotated gene-CDH20	ENSCHAG00000009606-ENSCHAG00000009619
17	18696059	A	G	53.8	27.9773	7.24	4.39397	intergenic_region	unannotated gene-CDH20	ENSCHAG00000009606-ENSCHAG00000009619
17	18696102	A	T	66.58	34.6232	8.27	5.01908	intergenic_region	unannotated gene-CDH20	ENSCHAG00000009606-ENSCHAG00000009619
17	18696322	T	A	51.63	26.8488	8.37	5.07977	intergenic_region	unannotated gene-CDH20	ENSCHAG00000009606-ENSCHAG00000009619
17	18696643	G	T	55.59	28.9081	4.15	2.51865	intergenic_region	unannotated gene-CDH20	ENSCHAG00000009606-ENSCHAG00000009619
17	18697151	C	G	63.13	32.8291	7.86	4.77025	intergenic_region	unannotated gene-CDH20	ENSCHAG00000009606-ENSCHAG00000009619
17	18707713	A	G	60.62	31.5238	7.07	4.2908	upstream_gene_variant	CDH20	ENSCHAG00000009619
17	18716520	T	G	50.57	26.2976	7.49	4.5457	downstream_gene_variant	CDH20	ENSCHAG00000009643
17	18719869	A	C	52.62	27.3636	7.82	4.74598	intron_variant	CDH20	ENSCHAG00000009643
17	18720054	A	C	51.67	26.8696	6.55	3.97521	intron_variant	CDH20	ENSCHAG00000009643
17	18721288	A	G	55.01	28.6065	7.13	4.32722	intron_variant	CDH20	ENSCHAG00000009643
17	18721302	G	T	52.31	27.2024	6.88	4.17549	intron_variant	CDH20	ENSCHAG00000009643
17	18721592	T	G	54.33	28.2529	4.71	2.85851	intron_variant	CDH20	ENSCHAG00000009643
17	18721888	C	G	50.86	26.4484	7.78	4.7217	intron_variant	CDH20	ENSCHAG00000009643
17	18723337	T	C	54.87	28.5337	7.25	4.40004	intron_variant	CDH20	ENSCHAG00000009643
17	18724822	A	G	52.02	27.0516	6.91	4.1937	intron_variant	CDH20	ENSCHAG00000009643
17	18726158	T	G	50.62	26.3236	5.46	3.31369	intron_variant	CDH20	ENSCHAG00000009643
17	25297289	C	T	54.55	28.3673	19.58	11.8832	intergenic_region	rreb1a-ly86	ENSCHAG00000003278-ENSCHAG00000003470
17	25298406	G	A	57.28	29.7869	22.97	13.9406	intergenic_region	rreb1a-ly86	ENSCHAG00000003278-ENSCHAG00000003470
17	25298428	A	T	57.13	29.7089	17.78	10.7907	intergenic_region	rreb1a-ly86	ENSCHAG00000003278-ENSCHAG00000003470
17	25298496	G	A	67.18	34.9352	28.18	17.1025	intergenic_region	rreb1a-ly86	ENSCHAG00000003278-ENSCHAG00000003470
17	25299010	C	T	53.16	27.6444	22.41	13.6007	intergenic_region	rreb1a-ly86	ENSCHAG00000003278-ENSCHAG00000003470
17	25299220	G	A	56.36	29.3085	16.17	9.81361	intergenic_region	rreb1a-ly86	ENSCHAG00000003278-ENSCHAG00000003470
17	25299565	T	G	77.86	40.489	28.88	17.5273	intergenic_region	rreb1a-ly86	ENSCHAG00000003278-ENSCHAG00000003470
17	25299581	C	A	76.17	39.6102	28.29	17.1693	intergenic_region	rreb1a-ly86	ENSCHAG00000003278-ENSCHAG00000003470
17	25299600	G	A	77.58	40.3434	30.19	18.3224	intergenic_region	rreb1a-ly86	ENSCHAG00000003278-ENSCHAG00000003470
17	25299849	A	C	52.09	27.088	27.49	16.6838	intergenic_region	rreb1a-ly86	ENSCHAG00000003278-ENSCHAG00000003470
17	25299857	C	G	54.06	28.1125	26.86	16.3014	intergenic_region	rreb1a-ly86	ENSCHAG00000003278-ENSCHAG00000003470
17	25299930	A	G	59.81	31.1026	30.17	18.3102	intergenic_region	rreb1a-ly86	ENSCHAG00000003278-ENSCHAG00000003470
17	25300492	C	G	64.91	33.7547	25.34	15.3789	intergenic_region	rreb1a-ly86	ENSCHAG00000003278-ENSCHAG00000003470
17	25300537	A	G	66.2	34.4256	27.26	16.5442	intergenic_region	rreb1a-ly86	ENSCHAG00000003278-ENSCHAG00000003470
17	25301440	A	C	54.82	28.5077	25.52	15.4882	intergenic_region	rreb1a-ly86	ENSCHAG00000003278-ENSCHAG00000003470
17	25301789	T	C	54.29	28.2321	20.78	12.6114	intergenic_region	rreb1a-ly86	ENSCHAG00000003278-ENSCHAG00000003470
17	25302018	G	T	51.09	26.568	22.41	13.6007	intergenic_region	rreb1a-ly86	ENSCHAG00000003278-ENSCHAG00000003470
17	25302044	G	C	54.95	28.5753	21.5	13.0484	intergenic_region	rreb1a-ly86	ENSCHAG00000003278-ENSCHAG00000003470
17	25302269	G	A	51.62	26.8436	22.69	13.7706	intergenic_region	rreb1a-ly86	ENSCHAG00000003278-ENSCHAG00000003470
17	25302423	C	T	60.44	31.4302	22.35	13.5643	intergenic_region	rreb1a-ly86	ENSCHAG00000003278-ENSCHAG00000003470
17	25302559	T	C	56.34	29.2981	22.97	13.9406	intergenic_region	rreb1a-ly86	ENSCHAG00000003278-ENSCHAG00000003470
17	25302578	T	C	62.33	32.4131	21.44	13.012	intergenic_region	rreb1a-ly86	ENSCHAG00000003278-ENSCHAG00000003470
17	25302864	C	T	52.15	27.1192	19.95	12.1077	intergenic_region	rreb1a-ly86	ENSCHAG00000003278-ENSCHAG00000003470
17	25306782	G	A	69.12	35.944	32.8	19.9064	intergenic_region	rreb1a-ly86	ENSCHAG00000003278-ENSCHAG00000003470
17	25306842	G	C	68.76	35.7568	32.26	19.5787	intergenic_region	rreb1a-ly86	ENSCHAG00000003278-ENSCHAG00000003470
17	25311488	A	T	48.69	25.3199	34.1	20.6954	intergenic_region	rreb1a-ly86	ENSCHAG00000003278-ENSCHAG00000003470
17	25312460	A	T	36.37	18.9133	30.19	18.3224	intergenic_region	rreb1a-ly86	ENSCHAG00000003278-ENSCHAG00000003470
17	25312669	G	A	68.77	35.762	37.01	22.4615	intergenic_region	rreb1a-ly86	ENSCHAG00000003278-ENSCHAG00000003470
17	25313509	A	T	77.43	40.2654	35.3	21.4237	intergenic_region	rreb1a-ly86	ENSCHAG00000003278-ENSCHAG00000003470
17	25314452	C	A	50.89	26.464	28.98	17.588	intergenic_region	rreb1a-ly86	ENSCHAG00000003278-ENSCHAG00000003470
17	25314906	G	T	47.88	24.8987	41.11	24.9498	downstream_gene_variant	ly86	ENSCHAG00000003470
17	25315265	A	T	41.45	21.555	31.35	19.0264	downstream_gene_variant	ly86	ENSCHAG00000003470
17	25315349	T	A	94.95	49.3762	40.07	24.3186	downstream_gene_variant	ly86	ENSCHAG00000003470
17	25315419	G	A	93.28	48.5078	41.43	25.144	downstream_gene_variant	ly86	ENSCHAG00000003470
17	25315508	C	T	102.94	53.5312	47.55	28.8582	downstream_gene_variant	ly86	ENSCHAG00000003470
17	25315721	T	G	50.85	26.4432	30.61	18.5773	downstream_gene_variant	ly86	ENSCHAG00000003470
17	25315770	A	G	84.32	43.8484	38.83	23.566	downstream_gene_variant	ly86	ENSCHAG00000003470
17	25315776	T	A	74.84	38.9186	38.05	23.0926	downstream_gene_variant	ly86	ENSCHAG00000003470
17	25315902	T	A	67.92	35.32	36.92	22.4068	downstream_gene_variant	ly86	ENSCHAG00000003470
17	25316078	C	A	61.68	32.075	23.48	14.2501	downstream_gene_variant	ly86	ENSCHAG00000003470
17	25316519	C	T	92.02	47.8526	43.43	26.3578	downstream_gene_variant	ly86	ENSCHAG00000003470
17	25316771	C	G	91.42	47.5405	46.33	28.1178	downstream_gene_variant	ly86	ENSCHAG00000003470
17	25316962	T	G	56.68	29.4749	38.02	23.0744	downstream_gene_variant	ly86	ENSCHAG00000003470
17	25316974	G	T	69.86	36.3288	39.12	23.742	downstream_gene_variant	ly86	ENSCHAG00000003470
17	25317422	T	C	80.65	41.9399	37.08	22.5039	downstream_gene_variant	ly86	ENSCHAG00000003470
17	25318354	T	A	72.98	37.9513	42.29	25.6659	downstream_gene_variant	ly86	ENSCHAG00000003470
17	25318355	A	C	64.4	33.4895	30.82	18.7047	downstream_gene_variant	ly86	ENSCHAG00000003470
17	25319487	C	T	50.93	26.4848	14.55	8.83043	3_prime_UTR_variant	ly86	ENSCHAG00000003470
17	25320506	G	A	77.92	40.5202	30.25	18.3588	intron_variant	ly86	ENSCHAG00000003470
17	25320753	G	T	55.19	28.7001	23.59	14.3168	intron_variant	ly86	ENSCHAG00000003470
17	25324844	C	T	55.25	28.7313	12.88	7.8169	intron_variant	ly86	ENSCHAG00000003470
17	25324874	G	A	67.14	34.9144	19.54	11.8589	intron_variant	ly86	ENSCHAG00000003470
17	25325236	T	C	60.32	31.3678	38.29	23.2383	intron_variant	ly86	ENSCHAG00000003470
17	25325265	T	G	35.41	18.414	31.84	19.3238	intron_variant	ly86	ENSCHAG00000003470
17	25325266	T	A	73.88	38.4193	45.93	27.875	intron_variant	ly86	ENSCHAG00000003470
17	25325724	T	G	83.69	43.5208	53.83	32.6696	intron_variant	ly86	ENSCHAG00000003470
17	25326318	C	G	39.69	20.6397	43.82	26.5945	intron_variant	ly86	ENSCHAG00000003470
17	25326337	T	G	42.7	22.205	42.47	25.7752	intron_variant	ly86	ENSCHAG00000003470
17	25327091	T	A	53.1	27.6132	25.64	15.561	intron_variant	ly86	ENSCHAG00000003470
17	25327828	G	A	98.85	51.4043	60.51	36.7237	intron_variant	ly86	ENSCHAG00000003470
17	25328168	A	T	94.58	49.1838	51.39	31.1887	intron_variant	ly86	ENSCHAG00000003470
17	25328283	G	C	86.64	45.0548	43.13	26.1757	intron_variant	ly86	ENSCHAG00000003470
17	25328293	G	A	98.32	51.1287	52.8	32.0445	intron_variant	ly86	ENSCHAG00000003470
17	25328312	C	A	104	54.0824	51.99	31.5529	intron_variant	ly86	ENSCHAG00000003470
17	25328346	C	A	55.66	28.9445	21.99	13.3458	intron_variant	ly86	ENSCHAG00000003470
17	25328392	G	T	110.21	57.3118	57.15	34.6845	intron_variant	ly86	ENSCHAG00000003470
17	25328602	C	A	73.04	37.9825	29.59	17.9582	missense_variant	ly86	ENSCHAG00000003470
17	25328603	T	A	71.25	37.0517	28.98	17.588	missense_variant	ly86	ENSCHAG00000003470
17	25328956	T	C	92.05	47.8682	49.93	30.3026	upstream_gene_variant	ly86	ENSCHAG00000003470
17	25329334	G	C	86.9	45.19	52.74	32.008	upstream_gene_variant	ly86	ENSCHAG00000003470
17	25329357	A	C	82.12	42.7043	50.97	30.9338	upstream_gene_variant	ly86	ENSCHAG00000003470
17	25329814	A	C	82.82	43.0683	25.34	15.3789	upstream_gene_variant	ly86	ENSCHAG00000003470
17	25329925	T	G	78.14	40.6346	50.47	30.6304	upstream_gene_variant	ly86	ENSCHAG00000003470
17	25330302	A	C	61.57	32.0178	42.6	25.854	upstream_gene_variant	ly86	ENSCHAG00000003470
17	25330397	A	C	98.08	51.0039	59.36	36.0257	upstream_gene_variant	ly86	ENSCHAG00000003470
17	25330413	G	A	110.74	57.5874	66.45	40.3287	upstream_gene_variant	ly86	ENSCHAG00000003470
17	25332605	A	T	43.69	22.7198	41.26	25.0408	upstream_gene_variant	ly86	ENSCHAG00000003470
17	25334144	A	G	31.72	16.4951	32.74	19.87	upstream_gene_variant	F13A1	ENSCHAG00000003517
17	25335040	A	T	41.91	21.7942	35.03	21.2598	upstream_gene_variant	F13A1	ENSCHAG00000003517
17	25337241	A	C	62.35	32.4235	39.37	23.8938	upstream_gene_variant	F13A1	ENSCHAG00000003517
17	25337253	T	A	108.84	56.5994	63	38.2349	upstream_gene_variant	F13A1	ENSCHAG00000003517
17	25337255	T	A	104.52	54.3529	61.5	37.3245	upstream_gene_variant	F13A1	ENSCHAG00000003517
17	25337394	T	C	112.84	58.6795	63.91	38.7871	upstream_gene_variant	F13A1	ENSCHAG00000003517
17	25337498	A	C	53.85	28.0033	46.46	28.1967	upstream_gene_variant	F13A1	ENSCHAG00000003517
17	25337941	A	C	105.06	54.6337	57.8	35.079	upstream_gene_variant	F13A1	ENSCHAG00000003517
17	25338017	A	C	94.18	48.9758	52.44	31.826	missense_variant	F13A1	ENSCHAG00000003517
17	25338534	G	A	70.16	36.4848	47.2	28.6458	intron_variant	F13A1	ENSCHAG00000003517
17	25338705	A	C	83.11	43.2192	45.12	27.3834	intron_variant	F13A1	ENSCHAG00000003517
17	25339164	G	A	81.97	42.6263	46.7	28.3423	intron_variant	F13A1	ENSCHAG00000003517
17	25339166	T	A	79.14	41.1547	46.36	28.136	intron_variant	F13A1	ENSCHAG00000003517
17	25339958	T	C	69.14	35.9544	45.47	27.5959	intron_variant	F13A1	ENSCHAG00000003517
17	25339980	A	T	82.13	42.7095	46.32	28.1117	intron_variant	F13A1	ENSCHAG00000003517
17	25339990	G	A	88.01	45.7673	46.32	28.1117	intron_variant	F13A1	ENSCHAG00000003517
17	25340191	G	A	101.29	52.6732	52.81	32.0505	intron_variant	F13A1	ENSCHAG00000003517
17	25340309	A	C	88.91	46.2353	48.88	29.6654	intron_variant	F13A1	ENSCHAG00000003517
17	25341169	C	T	44.21	22.9902	37.15	22.5464	intron_variant	F13A1	ENSCHAG00000003517
17	25341815	A	C	101.52	52.7928	52.56	31.8988	intron_variant	F13A1	ENSCHAG00000003517
17	25342168	C	A	95.28	49.5478	55.14	33.4646	intron_variant	F13A1	ENSCHAG00000003517
17	25342308	G	T	66.46	34.5608	34.94	21.2052	missense_variant	F13A1	ENSCHAG00000003517
17	25342702	C	T	87.37	45.4345	53.67	32.5725	splice_region_variant&synonymous_variant	F13A1	ENSCHAG00000003517
17	25342753	T	C	32.24	16.7656	36.79	22.3279	intron_variant	F13A1	ENSCHAG00000003517
17	25343802	A	G	81.93	42.6055	41.06	24.9194	intron_variant	F13A1	ENSCHAG00000003517
17	25343856	A	G	42.9	22.309	43.47	26.3821	intron_variant	F13A1	ENSCHAG00000003517
17	25343897	T	C	99.6	51.7943	53.02	32.178	intron_variant	F13A1	ENSCHAG00000003517
17	25343898	G	T	101	52.5224	52.52	31.8745	intron_variant	F13A1	ENSCHAG00000003517
17	25344266	C	A	113.05	58.7887	64.99	39.4426	intron_variant	F13A1	ENSCHAG00000003517
17	25344283	C	T	88.51	46.0273	57.4	34.8362	intron_variant	F13A1	ENSCHAG00000003517
17	25344347	C	T	97.04	50.4631	50.68	30.7578	intron_variant	F13A1	ENSCHAG00000003517
17	25344433	G	T	107.94	56.1313	65.05	39.479	intron_variant	F13A1	ENSCHAG00000003517
17	25344439	T	A	108.7	56.5266	63.48	38.5262	intron_variant	F13A1	ENSCHAG00000003517
17	25344618	G	A	120.2	62.5068	62.58	37.98	missense_variant	F13A1	ENSCHAG00000003517
17	25345494	G	A	75.79	39.4126	51.87	31.48	synonymous_variant	F13A1	ENSCHAG00000003517
17	25345555	G	A	110.21	57.3118	59.48	36.0986	missense_variant	F13A1	ENSCHAG00000003517
17	25346853	A	T	51.57	26.8176	29.18	17.7094	downstream_gene_variant	F13A1	ENSCHAG00000003517
17	25347421	A	G	44.14	22.9538	34.52	20.9503	downstream_gene_variant	F13A1	ENSCHAG00000003517
17	25347770	T	G	38.37	19.9533	34.47	20.9199	downstream_gene_variant	F13A1	ENSCHAG00000003517
17	25347905	C	T	56.3	29.2773	49.19	29.8535	downstream_gene_variant	F13A1	ENSCHAG00000003517
17	25348007	A	T	42.85	22.283	46.16	28.0146	downstream_gene_variant	F13A1	ENSCHAG00000003517
17	25348025	T	C	100.35	52.1844	63.16	38.332	downstream_gene_variant	F13A1	ENSCHAG00000003517
17	25348453	A	C	115.2	59.9067	64.05	38.8721	downstream_gene_variant	F13A1	ENSCHAG00000003517
17	25349025	C	T	31.9	16.5887	36.64	22.2369	downstream_gene_variant	F13A1	ENSCHAG00000003517
17	25349350	A	C	67.42	35.06	44.95	27.2803	downstream_gene_variant	F13A1	ENSCHAG00000003517
17	25349453	G	T	47.31	24.6023	39.35	23.8816	downstream_gene_variant	F13A1	ENSCHAG00000003517
17	25351294	G	A	76.04	39.5426	44.28	26.8736	intergenic_region	F13A1-F13A1	ENSCHAG00000003517-ENSCHAG00000003862
17	25352667	G	T	57.14	29.7141	48.14	29.2163	intergenic_region	F13A1-F13A1	ENSCHAG00000003517-ENSCHAG00000003862
17	25352954	C	A	61.31	31.8826	53.73	32.6089	intergenic_region	F13A1-F13A1	ENSCHAG00000003517-ENSCHAG00000003862
17	25353613	C	A	51.85	26.9632	42.72	25.9269	intergenic_region	F13A1-F13A1	ENSCHAG00000003517-ENSCHAG00000003862
17	25353803	T	C	52.09	27.088	40.66	24.6767	intergenic_region	F13A1-F13A1	ENSCHAG00000003517-ENSCHAG00000003862
17	25354047	G	A	80.29	41.7527	44.05	26.7341	intergenic_region	F13A1-F13A1	ENSCHAG00000003517-ENSCHAG00000003862
17	25354059	T	C	87.11	45.2992	42.19	25.6052	intergenic_region	F13A1-F13A1	ENSCHAG00000003517-ENSCHAG00000003862
17	25354835	T	C	41.9	21.789	32.77	19.8882	downstream_gene_variant	F13A1	ENSCHAG00000003862
17	25356633	G	T	51.84	26.958	50.92	30.9035	downstream_gene_variant	F13A1	ENSCHAG00000003862
17	25357388	G	A	59.87	31.1338	41.47	25.1682	downstream_gene_variant	F13A1	ENSCHAG00000003862
17	25357771	C	T	75.65	39.3398	37.63	22.8377	downstream_gene_variant	F13A1	ENSCHAG00000003862
17	25357822	T	C	95.16	49.4854	55.44	33.6467	downstream_gene_variant	F13A1	ENSCHAG00000003862
17	25358048	T	G	86.12	44.7844	41.34	25.0894	downstream_gene_variant	F13A1	ENSCHAG00000003862
17	25358163	G	T	75.23	39.1214	51.06	30.9884	downstream_gene_variant	F13A1	ENSCHAG00000003862
17	25358344	C	T	60.15	31.2794	35.68	21.6543	downstream_gene_variant	F13A1	ENSCHAG00000003862
17	25358640	A	T	58.48	30.411	52.31	31.7471	downstream_gene_variant	F13A1	ENSCHAG00000003862
17	25359651	T	A	46.27	24.0615	31.73	19.257	downstream_gene_variant	U5	ENSCHAG00000004421
17	25359877	G	A	81.07	42.1583	52.25	31.7107	splice_region_variant&intron_variant	F13A1	ENSCHAG00000003862
17	25360117	G	A	110.25	57.3326	65.87	39.9767	missense_variant	F13A1	ENSCHAG00000003862
17	25360622	T	C	106.13	55.1901	64.51	39.1513	missense_variant	F13A1	ENSCHAG00000003862
17	25360895	C	T	65.83	34.2331	34.63	21.017	downstream_gene_variant	U5	ENSCHAG00000004421
17	25360897	C	T	65.09	33.8483	35.6	21.6057	downstream_gene_variant	U5	ENSCHAG00000004421
17	25361115	A	T	53.6	27.8733	16.3	9.89251	downstream_gene_variant	U5	ENSCHAG00000004421
17	25361798	T	G	110.74	57.5874	58.56	35.5402	downstream_gene_variant	U5	ENSCHAG00000004421
17	25362525	T	C	105.5	54.8625	65.96	40.0313	downstream_gene_variant	U5	ENSCHAG00000004421
17	25362537	G	A	68.95	35.8556	30.33	18.4074	downstream_gene_variant	U5	ENSCHAG00000004421
17	25364410	A	G	116.89	60.7855	60.91	36.9664	downstream_gene_variant	U5	ENSCHAG00000004421
17	25364492	G	A	97.5	50.7023	63.32	38.4291	synonymous_variant	F13A1	ENSCHAG00000003862
17	25364590	A	T	97.05	50.4683	61.73	37.4641	downstream_gene_variant	U5	ENSCHAG00000004421
17	25364619	T	A	87.6	45.5541	51.98	31.5468	downstream_gene_variant	U5	ENSCHAG00000004421
17	25366014	T	C	84.7	44.046	56.8	34.4721	synonymous_variant	F13A1	ENSCHAG00000003862
17	25366248	T	C	44.08	22.9226	34.57	20.9806	upstream_gene_variant	U5	ENSCHAG00000004421
17	25366257	A	G	53.38	27.7589	36.81	22.3401	upstream_gene_variant	U5	ENSCHAG00000004421
17	25366359	G	A	69.4	36.0896	61.03	37.0393	upstream_gene_variant	U5	ENSCHAG00000004421
17	25366362	G	C	48.5	25.2211	35.83	21.7453	upstream_gene_variant	U5	ENSCHAG00000004421
17	25366681	A	G	104.41	54.2957	56.3	34.1686	upstream_gene_variant	U5	ENSCHAG00000004421
17	25366779	G	C	105.81	55.0237	66.35	40.268	upstream_gene_variant	U5	ENSCHAG00000004421
17	25367024	C	T	36.48	18.9705	32.25	19.5726	synonymous_variant	F13A1	ENSCHAG00000003862
17	25367291	C	T	55.75	28.9913	42.44	25.7569	upstream_gene_variant	U5	ENSCHAG00000004421
17	25367381	G	T	90.54	47.0829	55.02	33.3918	upstream_gene_variant	U5	ENSCHAG00000004421
17	25369245	A	C	47.37	24.6335	41.41	25.1318	upstream_gene_variant	U5	ENSCHAG00000004421
17	25369304	T	G	57.5	29.9014	34.25	20.7864	missense_variant	F13A1	ENSCHAG00000003862
17	25369316	T	C	57.62	29.9638	25.03	15.1908	missense_variant	F13A1	ENSCHAG00000003862
17	25369351	T	A	62.35	32.4235	31.05	18.8443	missense_variant	F13A1	ENSCHAG00000003862
17	25369376	T	C	63.02	32.7719	37.14	22.5404	missense_variant	F13A1	ENSCHAG00000003862
17	25369504	T	C	112.72	58.617	65.05	39.479	missense_variant	F13A1	ENSCHAG00000003862
17	25369508	T	G	113.29	58.9135	66.21	40.183	missense_variant	F13A1	ENSCHAG00000003862
17	25369580	G	T	89.58	46.5837	51.55	31.2858	upstream_gene_variant	U5	ENSCHAG00000004421
17	25369644	C	T	69.83	36.3132	45.37	27.5352	upstream_gene_variant	U5	ENSCHAG00000004421
17	25370775	G	T	120.07	62.4392	65.35	39.6611	upstream_gene_variant	F13A1	ENSCHAG00000003862
17	25370943	T	G	54.12	28.1437	41.72	25.32	upstream_gene_variant	F13A1	ENSCHAG00000003862
17	25376244	C	T	105.72	54.9769	64.82	39.3394	intergenic_region	F13A1-F13A1	ENSCHAG00000003862-ENSCHAG00000004426
17	25376644	G	A	95.81	49.8235	43.42	26.3517	intergenic_region	F13A1-F13A1	ENSCHAG00000003862-ENSCHAG00000004426
17	25376698	A	T	102.53	53.318	44.11	26.7705	intergenic_region	F13A1-F13A1	ENSCHAG00000003862-ENSCHAG00000004426
17	25376744	A	T	105.69	54.9613	48.4	29.3741	intergenic_region	F13A1-F13A1	ENSCHAG00000003862-ENSCHAG00000004426
17	25377782	G	A	83.75	43.552	37.15	22.5464	intergenic_region	F13A1-F13A1	ENSCHAG00000003862-ENSCHAG00000004426
17	25377821	C	A	94.05	48.9082	45.63	27.693	intergenic_region	F13A1-F13A1	ENSCHAG00000003862-ENSCHAG00000004426
17	25377826	T	G	92.78	48.2478	44.49	27.0011	intergenic_region	F13A1-F13A1	ENSCHAG00000003862-ENSCHAG00000004426
17	25377876	T	G	100.97	52.5068	54.54	33.1005	intergenic_region	F13A1-F13A1	ENSCHAG00000003862-ENSCHAG00000004426
17	25378060	T	C	32.71	17.01	32.3	19.603	intergenic_region	F13A1-F13A1	ENSCHAG00000003862-ENSCHAG00000004426
17	25378589	G	A	87.31	45.4033	39.8	24.1547	intergenic_region	F13A1-F13A1	ENSCHAG00000003862-ENSCHAG00000004426
17	25378603	C	T	91.45	47.5561	44.09	26.7583	intergenic_region	F13A1-F13A1	ENSCHAG00000003862-ENSCHAG00000004426
17	25379092	A	C	95.17	49.4906	49.02	29.7504	intergenic_region	F13A1-F13A1	ENSCHAG00000003862-ENSCHAG00000004426
17	25379095	A	T	95.83	49.8339	49.36	29.9567	intergenic_region	F13A1-F13A1	ENSCHAG00000003862-ENSCHAG00000004426
17	25379628	A	G	45.15	23.4791	37.9	23.0016	intergenic_region	F13A1-F13A1	ENSCHAG00000003862-ENSCHAG00000004426
17	25380660	A	T	46.69	24.2799	48	29.1313	intergenic_region	F13A1-F13A1	ENSCHAG00000003862-ENSCHAG00000004426
17	25383059	C	A	70.1	36.4536	28.01	16.9993	intergenic_region	F13A1-F13A1	ENSCHAG00000003862-ENSCHAG00000004426
17	25383259	T	G	89.16	46.3653	46.54	28.2452	upstream_gene_variant	F13A1	ENSCHAG00000004426
17	25383464	A	G	87.95	45.7361	58.05	35.2307	upstream_gene_variant	F13A1	ENSCHAG00000004426
17	25383682	T	C	92.72	48.2166	59.26	35.965	upstream_gene_variant	F13A1	ENSCHAG00000004426
17	25383809	C	T	90.41	47.0153	58.28	35.3703	upstream_gene_variant	F13A1	ENSCHAG00000004426
17	25383836	C	T	73.69	38.3205	46.24	28.0632	upstream_gene_variant	F13A1	ENSCHAG00000004426
17	25383984	G	A	71.04	36.9425	41.07	24.9255	upstream_gene_variant	F13A1	ENSCHAG00000004426
17	25384547	A	C	76.16	39.605	36.28	22.0184	upstream_gene_variant	F13A1	ENSCHAG00000004426
17	25384682	T	G	84.66	44.0252	42.83	25.9936	upstream_gene_variant	F13A1	ENSCHAG00000004426
17	25384709	C	T	90.29	46.9529	44.68	27.1164	upstream_gene_variant	F13A1	ENSCHAG00000004426
17	25385622	G	A	74.33	38.6533	39.39	23.9059	upstream_gene_variant	F13A1	ENSCHAG00000004426
17	25385687	G	T	98.77	51.3627	50.85	30.861	upstream_gene_variant	F13A1	ENSCHAG00000004426
17	25386496	T	A	82.43	42.8655	35.65	21.6361	upstream_gene_variant	F13A1	ENSCHAG00000004426
17	25387677	T	C	104.62	54.4049	66.54	40.3833	upstream_gene_variant	F13A1	ENSCHAG00000004426
17	25387868	A	G	93.34	48.539	60.39	36.6508	upstream_gene_variant	F13A1	ENSCHAG00000004426
17	25388244	G	T	58.35	30.3434	41.19	24.9983	intron_variant	F13A1	ENSCHAG00000004426
17	25388265	G	T	67.54	35.1224	51.05	30.9824	splice_acceptor_variant&intron_variant	F13A1	ENSCHAG00000004426
17	25388421	G	A	111.26	57.8578	66.08	40.1041	missense_variant	F13A1	ENSCHAG00000004426
17	25389354	G	A	85.88	44.6596	32.88	19.955	intron_variant	F13A1	ENSCHAG00000004426
17	25389787	G	A	94.11	48.9394	53.06	32.2022	intron_variant	F13A1	ENSCHAG00000004426
17	25389788	A	C	95.57	49.6986	52.71	31.9898	intron_variant	F13A1	ENSCHAG00000004426
17	25390308	A	T	53.76	27.9565	27.34	16.5927	intron_variant	F13A1	ENSCHAG00000004426
17	25390343	G	C	103.91	54.0356	52.11	31.6257	intron_variant	F13A1	ENSCHAG00000004426
17	25390640	A	C	108.86	56.6098	58.79	35.6798	intron_variant	F13A1	ENSCHAG00000004426
17	25390694	G	A	106.31	55.2837	54.33	32.973	intron_variant	F13A1	ENSCHAG00000004426
17	25390872	G	A	77.25	40.1718	54.69	33.1915	synonymous_variant	F13A1	ENSCHAG00000004426
17	25390945	A	C	110.42	57.421	58.87	35.7284	intron_variant	F13A1	ENSCHAG00000004426
17	25391001	G	T	85.03	44.2176	42.07	25.5324	intron_variant	F13A1	ENSCHAG00000004426
17	25391100	C	T	55.32	28.7677	41.71	25.3139	intron_variant	F13A1	ENSCHAG00000004426
17	25391284	C	G	62.89	32.7043	39.24	23.8149	intron_variant	F13A1	ENSCHAG00000004426
17	25391353	A	T	97.29	50.5931	64.14	38.9267	intron_variant	F13A1	ENSCHAG00000004426
17	25391935	G	T	82.37	42.8343	54.74	33.2218	intron_variant	F13A1	ENSCHAG00000004426
17	25392132	G	A	88.41	45.9753	55.26	33.5374	synonymous_variant	F13A1	ENSCHAG00000004426
17	25392141	C	T	94.89	49.345	60.06	36.4506	synonymous_variant	F13A1	ENSCHAG00000004426
17	25392690	C	T	56.68	29.4749	45.86	27.8326	intron_variant	F13A1	ENSCHAG00000004426
17	25393134	C	T	86.77	45.1224	58.82	35.698	synonymous_variant	F13A1	ENSCHAG00000004426
17	25393141	A	G	88.37	45.9545	58.72	35.6373	missense_variant	F13A1	ENSCHAG00000004426
17	25393155	T	G	92.32	48.0086	60.72	36.8511	missense_variant	F13A1	ENSCHAG00000004426
17	25393504	C	T	91.74	47.707	59.26	35.965	intron_variant	F13A1	ENSCHAG00000004426
17	25396951	C	A	68.73	35.7412	45.44	27.5777	intron_variant	F13A1	ENSCHAG00000004426
17	25397614	C	T	49.05	25.5072	41.66	25.2836	intron_variant	F13A1	ENSCHAG00000004426
17	25397626	A	G	86.82	45.1484	55.26	33.5374	intron_variant	F13A1	ENSCHAG00000004426
17	25397787	A	G	91.22	47.4365	52.58	31.9109	intron_variant	F13A1	ENSCHAG00000004426
17	25400213	T	G	89.98	46.7917	50.79	30.8246	intron_variant	F13A1	ENSCHAG00000004426
17	25400317	A	G	85.27	44.3424	49.55	30.072	intron_variant	F13A1	ENSCHAG00000004426
17	25400327	G	C	98.43	51.1859	55.26	33.5374	intron_variant	F13A1	ENSCHAG00000004426
17	25403383	A	T	50.94	26.49	34.82	21.1323	downstream_gene_variant	F13A1	ENSCHAG00000004426
17	25403584	G	T	94.83	49.3138	45.57	27.6565	downstream_gene_variant	F13A1	ENSCHAG00000004426
17	25403658	C	T	38.83	20.1925	36.84	22.3583	downstream_gene_variant	F13A1	ENSCHAG00000004426
17	25404313	A	C	75.56	39.293	43.69	26.5156	downstream_gene_variant	F13A1	ENSCHAG00000004426
17	25404314	A	C	69.83	36.3132	40.85	24.792	downstream_gene_variant	F13A1	ENSCHAG00000004426
17	25404363	A	G	78.58	40.8634	49.43	29.9992	downstream_gene_variant	F13A1	ENSCHAG00000004426
17	25404808	T	C	82.62	42.9643	52.07	31.6014	downstream_gene_variant	F13A1	ENSCHAG00000004426
17	25404839	C	G	81.34	42.2987	40.55	24.6099	downstream_gene_variant	F13A1	ENSCHAG00000004426
17	25405255	T	A	70.12	36.464	48.96	29.7139	downstream_gene_variant	F13A1	ENSCHAG00000004426
17	25405634	G	A	96.69	50.2811	49.14	29.8232	downstream_gene_variant	F13A1	ENSCHAG00000004426
17	25405685	T	G	83.16	43.2452	48.86	29.6533	downstream_gene_variant	F13A1	ENSCHAG00000004426
17	25406345	T	A	60.72	31.5758	23.46	14.2379	intergenic_region	F13A1-nrn1a	ENSCHAG00000004426-ENSCHAG00000004673
17	25406384	T	A	69.74	36.2664	43.62	26.4731	intergenic_region	F13A1-nrn1a	ENSCHAG00000004426-ENSCHAG00000004673
17	25406526	T	C	77.79	40.4526	31.66	19.2145	intergenic_region	F13A1-nrn1a	ENSCHAG00000004426-ENSCHAG00000004673
17	25407792	A	G	57.77	30.0418	35.06	21.278	upstream_gene_variant	nrn1a	ENSCHAG00000004673
17	25408468	A	C	85.05	44.228	47.36	28.7429	upstream_gene_variant	nrn1a	ENSCHAG00000004673
17	25409846	T	C	92.6	48.1542	55.96	33.9623	upstream_gene_variant	nrn1a	ENSCHAG00000004673
17	25409956	A	G	94.72	49.2566	56.05	34.0169	upstream_gene_variant	nrn1a	ENSCHAG00000004673
17	25410494	T	C	74.54	38.7626	44.72	27.1407	upstream_gene_variant	nrn1a	ENSCHAG00000004673
17	25411129	A	C	68.36	35.5488	40.31	24.4642	upstream_gene_variant	nrn1a	ENSCHAG00000004673
17	25411336	C	T	72.42	37.6601	40.57	24.622	upstream_gene_variant	nrn1a	ENSCHAG00000004673
17	25411753	G	A	69.16	35.9648	43.01	26.1029	upstream_gene_variant	nrn1a	ENSCHAG00000004673
17	25411838	G	T	73.81	38.3829	48.01	29.1374	upstream_gene_variant	nrn1a	ENSCHAG00000004673
17	25412027	G	C	75.72	39.3762	37.15	22.5464	upstream_gene_variant	nrn1a	ENSCHAG00000004673
17	25412288	A	C	54.52	28.3517	38.53	23.384	upstream_gene_variant	nrn1a	ENSCHAG00000004673
17	25413291	G	T	87.04	45.2628	43.49	26.3942	intron_variant	nrn1a	ENSCHAG00000004673
17	25413663	T	G	79.01	41.0871	49.44	30.0053	intron_variant	nrn1a	ENSCHAG00000004673
17	25413802	T	G	90.57	47.0985	37.87	22.9834	intron_variant	nrn1a	ENSCHAG00000004673
17	25413951	A	T	71.63	37.2493	37.63	22.8377	intron_variant	nrn1a	ENSCHAG00000004673
17	25414283	C	T	76.36	39.709	36.48	22.1398	intron_variant	nrn1a	ENSCHAG00000004673
17	25414306	T	C	79.55	41.3679	46.91	28.4698	intron_variant	nrn1a	ENSCHAG00000004673
17	25414492	T	G	99.78	51.8879	50.25	30.4969	intron_variant	nrn1a	ENSCHAG00000004673
17	25414851	A	T	84.95	44.176	44.61	27.0739	intron_variant	nrn1a	ENSCHAG00000004673
17	25415129	A	T	73.57	38.2581	38	23.0623	intron_variant	nrn1a	ENSCHAG00000004673
17	25416147	T	C	84.79	44.0928	51.24	31.0977	intron_variant	nrn1a	ENSCHAG00000004673
17	25416277	A	G	58.42	30.3798	37.78	22.9288	intron_variant	nrn1a	ENSCHAG00000004673
17	25416648	T	G	49.55	25.7672	32.02	19.433	synonymous_variant	nrn1a	ENSCHAG00000004673
17	25417212	G	C	57.21	29.7505	37.87	22.9834	downstream_gene_variant	nrn1a	ENSCHAG00000004673
17	25417324	G	C	66.69	34.6804	38.92	23.6206	downstream_gene_variant	nrn1a	ENSCHAG00000004673
17	25417915	A	C	64.82	33.7079	39.97	24.2579	downstream_gene_variant	nrn1a	ENSCHAG00000004673
17	25418333	A	T	69.32	36.048	42.39	25.7266	downstream_gene_variant	nrn1a	ENSCHAG00000004673
17	25418616	A	T	64.81	33.7027	42.06	25.5263	downstream_gene_variant	nrn1a	ENSCHAG00000004673
17	25418881	G	T	68.14	35.4344	36.79	22.3279	downstream_gene_variant	nrn1a	ENSCHAG00000004673
17	25419253	C	A	49.87	25.9336	34.64	21.0231	downstream_gene_variant	nrn1a	ENSCHAG00000004673
17	25419606	A	T	47.96	24.9403	44.91	27.256	downstream_gene_variant	nrn1a	ENSCHAG00000004673
17	25419823	T	C	47.63	24.7687	40.9	24.8223	downstream_gene_variant	nrn1a	ENSCHAG00000004673
17	25420427	G	T	58.26	30.2966	35.26	21.3994	downstream_gene_variant	nrn1a	ENSCHAG00000004673
17	25420480	T	C	62.46	32.4807	37.26	22.6132	downstream_gene_variant	nrn1a	ENSCHAG00000004673
17	25420502	T	C	57.23	29.7609	36.29	22.0245	downstream_gene_variant	nrn1a	ENSCHAG00000004673
17	25421365	G	A	75.08	39.0434	41.63	25.2654	downstream_gene_variant	nrn1a	ENSCHAG00000004673
17	25421459	A	G	66.48	34.5712	34.6	20.9988	downstream_gene_variant	nrn1a	ENSCHAG00000004673
17	25421757	T	A	60.6	31.5134	32.63	19.8032	intergenic_region	nrn1a-lncRNA	ENSCHAG00000004673-ENSCHAG00000004682
17	25421954	G	A	60.51	31.4666	31.44	19.081	intergenic_region	nrn1a-lncRNA	ENSCHAG00000004673-ENSCHAG00000004682
17	25421986	C	T	59.46	30.9206	33.54	20.3555	intergenic_region	nrn1a-lncRNA	ENSCHAG00000004673-ENSCHAG00000004682
17	25422320	C	T	59.21	30.7906	37.65	22.8499	intergenic_region	nrn1a-lncRNA	ENSCHAG00000004673-ENSCHAG00000004682
17	25422455	G	A	62.9	32.7095	43.05	26.1272	intergenic_region	nrn1a-lncRNA	ENSCHAG00000004673-ENSCHAG00000004682
17	25422718	G	A	56.34	29.2981	41.01	24.8891	intergenic_region	nrn1a-lncRNA	ENSCHAG00000004673-ENSCHAG00000004682
17	25423279	A	G	56.18	29.2149	33.11	20.0945	intergenic_region	nrn1a-lncRNA	ENSCHAG00000004673-ENSCHAG00000004682
17	25423329	C	T	57.17	29.7297	39.32	23.8634	intergenic_region	nrn1a-lncRNA	ENSCHAG00000004673-ENSCHAG00000004682
17	25423361	A	G	51.88	26.9788	35.96	21.8242	intergenic_region	nrn1a-lncRNA	ENSCHAG00000004673-ENSCHAG00000004682
17	25423376	A	G	57.54	29.9222	41.47	25.1682	intergenic_region	nrn1a-lncRNA	ENSCHAG00000004673-ENSCHAG00000004682
17	25423705	C	T	67.82	35.268	37.01	22.4615	intergenic_region	nrn1a-lncRNA	ENSCHAG00000004673-ENSCHAG00000004682
17	25423715	G	A	70.88	36.8593	45.15	27.4016	intergenic_region	nrn1a-lncRNA	ENSCHAG00000004673-ENSCHAG00000004682
17	25423884	G	A	56.75	29.5113	37.7	22.8802	intergenic_region	nrn1a-lncRNA	ENSCHAG00000004673-ENSCHAG00000004682
17	25423983	C	A	52.8	27.4572	39.67	24.0758	intergenic_region	nrn1a-lncRNA	ENSCHAG00000004673-ENSCHAG00000004682
17	25424033	T	A	62.19	32.3403	39.92	24.2275	intergenic_region	nrn1a-lncRNA	ENSCHAG00000004673-ENSCHAG00000004682
17	25424150	C	T	51.47	26.7656	33.43	20.2888	intergenic_region	nrn1a-lncRNA	ENSCHAG00000004673-ENSCHAG00000004682
17	25424280	T	G	50.1	26.0532	33.27	20.1916	intergenic_region	nrn1a-lncRNA	ENSCHAG00000004673-ENSCHAG00000004682
17	25424810	G	A	43.41	22.5742	33.99	20.6286	intergenic_region	nrn1a-lncRNA	ENSCHAG00000004673-ENSCHAG00000004682
17	25424942	T	G	61.33	31.893	34.37	20.8592	intergenic_region	nrn1a-lncRNA	ENSCHAG00000004673-ENSCHAG00000004682
17	25425082	T	A	44.77	23.2815	36.65	22.243	intergenic_region	nrn1a-lncRNA	ENSCHAG00000004673-ENSCHAG00000004682
17	25425190	G	T	63.52	33.0319	41.5	25.1865	intergenic_region	nrn1a-lncRNA	ENSCHAG00000004673-ENSCHAG00000004682
17	25425518	C	A	51.93	27.0048	29.4	17.8429	intergenic_region	nrn1a-lncRNA	ENSCHAG00000004673-ENSCHAG00000004682
17	25426022	C	A	45.07	23.4375	36.84	22.3583	intergenic_region	nrn1a-lncRNA	ENSCHAG00000004673-ENSCHAG00000004682
17	25426247	A	C	60.78	31.607	44.56	27.0436	intergenic_region	nrn1a-lncRNA	ENSCHAG00000004673-ENSCHAG00000004682
17	25426274	G	A	59.42	30.8998	44.5	27.0072	intergenic_region	nrn1a-lncRNA	ENSCHAG00000004673-ENSCHAG00000004682
17	25426333	C	T	60.62	31.5238	48.67	29.5379	intergenic_region	nrn1a-lncRNA	ENSCHAG00000004673-ENSCHAG00000004682
17	25426338	T	G	53.73	27.9409	48.1	29.192	intergenic_region	nrn1a-lncRNA	ENSCHAG00000004673-ENSCHAG00000004682
17	25426595	G	A	41.93	21.8046	35.58	21.5936	intergenic_region	nrn1a-lncRNA	ENSCHAG00000004673-ENSCHAG00000004682
17	25426619	A	G	50.33	26.1728	45	27.3106	intergenic_region	nrn1a-lncRNA	ENSCHAG00000004673-ENSCHAG00000004682
17	25428386	A	T	53.26	27.6965	37.43	22.7164	intergenic_region	nrn1a-lncRNA	ENSCHAG00000004673-ENSCHAG00000004682
17	25428391	A	G	51.8	26.9372	37.94	23.0259	intergenic_region	nrn1a-lncRNA	ENSCHAG00000004673-ENSCHAG00000004682
17	25428479	C	T	53.95	28.0553	34.53	20.9563	intergenic_region	nrn1a-lncRNA	ENSCHAG00000004673-ENSCHAG00000004682
17	25428550	A	G	64.1	33.3335	33.55	20.3616	intergenic_region	nrn1a-lncRNA	ENSCHAG00000004673-ENSCHAG00000004682
17	25429507	T	C	59.77	31.0818	32.16	19.518	intergenic_region	nrn1a-lncRNA	ENSCHAG00000004673-ENSCHAG00000004682
17	25429551	T	G	44.29	23.0318	31.47	19.0992	intergenic_region	nrn1a-lncRNA	ENSCHAG00000004673-ENSCHAG00000004682
17	25429561	C	G	41.4	21.529	31.87	19.342	intergenic_region	nrn1a-lncRNA	ENSCHAG00000004673-ENSCHAG00000004682
17	25433600	C	T	43.68	22.7146	30.4	18.4498	downstream_gene_variant	lncRNA	ENSCHAG00000004682
18	5102181	C	T	50.56	26.2924	19.37	11.7557	upstream_gene_variant	AOPEP	ENSCHAG00000019188
18	5102584	T	G	54.83	28.5129	19.23	11.6707	upstream_gene_variant	AOPEP	ENSCHAG00000019188
18	5116301	G	A	52.99	27.556	18.78	11.3976	intron_variant	dock8	ENSCHAG00000019353
18	5119712	C	T	50.7	26.3652	15.04	9.12781	intron_variant	dock8	ENSCHAG00000019353
18	5123413	T	C	52.66	27.3844	22.49	13.6492	intron_variant	dock8	ENSCHAG00000019353
18	5125232	C	T	51.26	26.6564	20.03	12.1563	intron_variant	dock8	ENSCHAG00000019353
18	5126808	G	T	63.97	33.2659	21.36	12.9634	intron_variant	dock8	ENSCHAG00000019353
18	5129453	G	A	50.07	26.0376	26	15.7795	intron_variant	dock8	ENSCHAG00000019353
18	5132247	T	C	64.32	33.4479	20.45	12.4112	intron_variant	dock8	ENSCHAG00000019353
18	5133616	A	C	51.69	26.88	24.4	14.8084	upstream_gene_variant	dock8	ENSCHAG00000019353
18	5133792	A	C	53.26	27.6965	21.49	13.0423	upstream_gene_variant	dock8	ENSCHAG00000019353
18	5136810	T	C	54.36	28.2685	14.27	8.6605	upstream_gene_variant	dock8	ENSCHAG00000019353
18	5137174	G	T	56.31	29.2825	27.34	16.5927	upstream_gene_variant	dock8	ENSCHAG00000019353
18	5141008	T	A	58.46	30.4006	17.25	10.4691	upstream_gene_variant	dock8	ENSCHAG00000019353
18	5141146	G	T	53.92	28.0397	18.66	11.3248	upstream_gene_variant	dock8	ENSCHAG00000019353
18	5141865	A	G	54.22	28.1957	17.48	10.6087	intron_variant	dock8	ENSCHAG00000019353
18	5141945	C	A	60.59	31.5082	21.85	13.2608	intron_variant	dock8	ENSCHAG00000019353
18	5142267	C	G	61.49	31.9762	23.2	14.0801	intron_variant	dock8	ENSCHAG00000019353
18	5142800	C	A	53.21	27.6705	21.59	13.103	intron_variant	dock8	ENSCHAG00000019353
18	5144030	A	G	59.08	30.723	26.73	16.2225	upstream_gene_variant	cbwd	ENSCHAG00000024950
18	5144523	G	A	62.86	32.6887	32.04	19.4452	upstream_gene_variant	cbwd	ENSCHAG00000024950
18	5144587	T	C	58.64	30.4942	31.47	19.0992	upstream_gene_variant	cbwd	ENSCHAG00000024950
18	5145894	T	G	61.84	32.1583	21.95	13.3215	upstream_gene_variant	cbwd	ENSCHAG00000024950
18	5145905	A	T	53	27.5612	20.26	12.2958	upstream_gene_variant	cbwd	ENSCHAG00000024950
18	5146086	G	A	61.6	32.0334	20.19	12.2534	upstream_gene_variant	cbwd	ENSCHAG00000024950
18	5146198	G	A	57.22	29.7557	24.51	14.8752	upstream_gene_variant	cbwd	ENSCHAG00000024950
18	5146426	C	G	60.86	31.6486	24.71	14.9966	upstream_gene_variant	cbwd	ENSCHAG00000024950
18	5147033	T	G	50.49	26.256	30.65	18.6016	upstream_gene_variant	cbwd	ENSCHAG00000024950
18	5147671	T	G	58.01	30.1666	19.71	11.962	upstream_gene_variant	dock8	ENSCHAG00000019353
18	5148131	G	A	57.26	29.7765	24.6	14.9298	upstream_gene_variant	dock8	ENSCHAG00000019353
18	5148437	C	G	58.86	30.6086	20.93	12.7025	5_prime_UTR_variant	cbwd	ENSCHAG00000024950
18	5148885	G	C	69.9	36.3496	26.91	16.3317	splice_region_variant&intron_variant	cbwd	ENSCHAG00000024950
18	5149051	T	G	61.7	32.0855	26.08	15.828	upstream_gene_variant	dock8	ENSCHAG00000019353
18	5149294	C	A	52.14	27.114	25.83	15.6763	upstream_gene_variant	dock8	ENSCHAG00000019353
18	5149441	A	G	58.69	30.5202	24.87	15.0937	upstream_gene_variant	dock8	ENSCHAG00000019353
18	5149602	A	C	50.81	26.4224	23.06	13.9952	upstream_gene_variant	dock8	ENSCHAG00000019353
18	5149605	A	G	55.57	28.8977	22.87	13.8799	upstream_gene_variant	dock8	ENSCHAG00000019353
18	5149620	G	C	51.63	26.8488	25.26	15.3304	upstream_gene_variant	dock8	ENSCHAG00000019353
18	5149646	T	G	50.73	26.3808	21.01	12.751	upstream_gene_variant	dock8	ENSCHAG00000019353
18	5149684	T	C	50.02	26.0116	23.34	14.1651	upstream_gene_variant	dock8	ENSCHAG00000019353
18	5150315	T	C	52.49	27.296	22.98	13.9466	synonymous_variant	cbwd	ENSCHAG00000024950
18	5150853	C	A	63.61	33.0787	21.59	13.103	upstream_gene_variant	dock8	ENSCHAG00000019353
18	5151113	G	A	57.49	29.8962	13.22	8.02325	upstream_gene_variant	dock8	ENSCHAG00000019353
18	5151123	A	G	51.02	26.5316	15.24	9.24919	upstream_gene_variant	dock8	ENSCHAG00000019353
18	5151431	C	T	60.42	31.4198	26.27	15.9433	upstream_gene_variant	dock8	ENSCHAG00000019353
18	5151614	T	C	68.5	35.6216	22.06	13.3883	upstream_gene_variant	dock8	ENSCHAG00000019353
18	5152431	T	A	78.76	40.9571	23.85	14.4746	intron_variant	cbwd	ENSCHAG00000024950
18	5152475	A	C	67.45	35.0756	22.9	13.8981	intron_variant	cbwd	ENSCHAG00000024950
18	5153448	A	G	67.07	34.878	28.6	17.3574	upstream_gene_variant	foxd5	ENSCHAG00000025090
18	5153482	T	C	53.15	27.6392	27.98	16.9811	upstream_gene_variant	foxd5	ENSCHAG00000025090
18	5153487	C	A	62.15	32.3195	29.38	17.8308	upstream_gene_variant	foxd5	ENSCHAG00000025090
18	5154579	G	A	60.9	31.6694	27.19	16.5017	synonymous_variant	cbwd	ENSCHAG00000024950
18	5155515	T	G	76.61	39.839	31.85	19.3298	3_prime_UTR_variant	cbwd	ENSCHAG00000024950
18	5156255	G	A	71.13	36.9893	27.49	16.6838	3_prime_UTR_variant	cbwd	ENSCHAG00000024950
18	5156591	T	C	79.49	41.3367	29.59	17.9582	3_prime_UTR_variant	cbwd	ENSCHAG00000024950
18	5157014	T	C	72.06	37.4729	29.77	18.0675	upstream_gene_variant	foxd5	ENSCHAG00000025090
18	5158136	G	A	69.66	36.2248	33.14	20.1128	missense_variant	foxd5	ENSCHAG00000025090
18	5159051	T	G	75.09	39.0486	25.32	15.3668	upstream_gene_variant	pgm5	ENSCHAG00000025097
18	5159897	C	T	50.03	26.0168	20.35	12.3505	synonymous_variant	pgm5	ENSCHAG00000025097
18	5160163	G	A	54.42	28.2997	16.83	10.2142	downstream_gene_variant	cbwd	ENSCHAG00000024950
18	5160493	T	G	56.68	29.4749	19.16	11.6283	downstream_gene_variant	cbwd	ENSCHAG00000024950
18	5161090	T	C	77.43	40.2654	25.41	15.4214	downstream_gene_variant	cbwd	ENSCHAG00000024950
18	5161179	T	C	75.3	39.1578	26.93	16.3439	downstream_gene_variant	cbwd	ENSCHAG00000024950
18	5161498	C	A	78.51	40.827	25.05	15.2029	downstream_gene_variant	cbwd	ENSCHAG00000024950
18	5161701	C	T	80.54	41.8827	24.07	14.6081	downstream_gene_variant	foxd5	ENSCHAG00000025090
18	5161989	T	G	69.85	36.3236	31.61	19.1842	downstream_gene_variant	foxd5	ENSCHAG00000025090
18	5163554	T	G	60.05	31.2274	9.78	5.93551	downstream_gene_variant	foxd5	ENSCHAG00000025090
18	5163555	G	A	59.2	30.7854	9.93	6.02654	downstream_gene_variant	foxd5	ENSCHAG00000025090
18	5163618	A	C	51.5	26.7812	13.09	7.94435	downstream_gene_variant	foxd5	ENSCHAG00000025090
18	5163653	C	A	53.41	27.7745	13.47	8.17498	downstream_gene_variant	foxd5	ENSCHAG00000025090
18	5164042	A	C	79.62	41.4043	33.46	20.307	downstream_gene_variant	foxd5	ENSCHAG00000025090
18	5164380	A	G	74.52	38.7522	23.86	14.4807	intron_variant	pgm5	ENSCHAG00000025097
18	5165412	C	A	76.32	39.6882	28.73	17.4363	intron_variant	pgm5	ENSCHAG00000025097
18	5165851	G	A	76.43	39.7454	32.67	19.8275	intron_variant	pgm5	ENSCHAG00000025097
18	5165964	C	T	66.65	34.6596	25.7	15.5974	intron_variant	pgm5	ENSCHAG00000025097
18	5167313	A	G	71.95	37.4157	25.96	15.7552	intron_variant	pgm5	ENSCHAG00000025097
18	5167674	C	G	60.78	31.607	14.7	8.92147	intron_variant	pgm5	ENSCHAG00000025097
18	5168397	C	T	83.19	43.2608	32.38	19.6515	intron_variant	pgm5	ENSCHAG00000025097
18	5168640	A	T	87.19	45.3408	31.41	19.0628	intron_variant	pgm5	ENSCHAG00000025097
18	5168701	T	G	62.43	32.4651	18.77	11.3916	intron_variant	pgm5	ENSCHAG00000025097
18	5168774	T	G	60.45	31.4354	19.69	11.9499	intron_variant	pgm5	ENSCHAG00000025097
18	5168777	A	T	61.78	32.1271	19.59	11.8892	intron_variant	pgm5	ENSCHAG00000025097
18	5168845	A	G	60.74	31.5862	16.26	9.86824	intron_variant	pgm5	ENSCHAG00000025097
18	5168846	T	G	62.22	32.3559	15.5	9.40699	intron_variant	pgm5	ENSCHAG00000025097
18	5168941	A	T	61.65	32.0594	17.72	10.7543	intron_variant	pgm5	ENSCHAG00000025097
18	5168950	G	C	67.13	34.9092	20.43	12.399	intron_variant	pgm5	ENSCHAG00000025097
18	5170087	T	A	58.77	30.5618	17.51	10.6269	intron_variant	pgm5	ENSCHAG00000025097
18	5170953	C	T	64.13	33.3491	27.66	16.7869	intron_variant	pgm5	ENSCHAG00000025097
18	5172039	G	T	62.01	32.2467	21.18	12.8542	intron_variant	pgm5	ENSCHAG00000025097
18	5172544	G	T	68.12	35.424	16.14	9.79541	intron_variant	pgm5	ENSCHAG00000025097
18	5172840	G	A	96.8	50.3383	32.48	19.7122	intron_variant	pgm5	ENSCHAG00000025097
18	5173101	C	T	87.04	45.2628	33.72	20.4648	intron_variant	pgm5	ENSCHAG00000025097
18	5173136	T	C	61.22	31.8358	13.46	8.16891	intron_variant	pgm5	ENSCHAG00000025097
18	5173256	C	A	87.04	45.2628	36.25	22.0002	intron_variant	pgm5	ENSCHAG00000025097
18	5173347	T	C	50.5	26.2612	13.91	8.44201	intron_variant	pgm5	ENSCHAG00000025097
18	5173437	G	T	55.29	28.7521	14.76	8.95788	synonymous_variant	pgm5	ENSCHAG00000025097
18	5173801	G	T	85.78	44.6076	30.42	18.462	intron_variant	pgm5	ENSCHAG00000025097
18	5173809	C	T	83.31	43.3232	31.24	18.9596	intron_variant	pgm5	ENSCHAG00000025097
18	5176199	C	T	65.29	33.9523	22.83	13.8556	intron_variant	pgm5	ENSCHAG00000025097
18	5176261	C	A	79.3	41.2379	29.11	17.6669	intron_variant	pgm5	ENSCHAG00000025097
18	5176517	G	A	77.98	40.5514	27.49	16.6838	intron_variant	pgm5	ENSCHAG00000025097
18	5176822	G	A	99.08	51.5239	43.15	26.1878	intron_variant	pgm5	ENSCHAG00000025097
18	5176950	A	G	95.21	49.5114	34.16	20.7318	intron_variant	pgm5	ENSCHAG00000025097
18	5176971	T	C	94.28	49.0278	34.42	20.8896	intron_variant	pgm5	ENSCHAG00000025097
18	5177227	T	G	73.15	38.0397	29.26	17.758	intron_variant	pgm5	ENSCHAG00000025097
18	5177514	G	A	108.07	56.1989	40.24	24.4218	intron_variant	pgm5	ENSCHAG00000025097
18	5178132	A	T	64.92	33.7599	18.75	11.3794	intron_variant	pgm5	ENSCHAG00000025097
18	5178151	T	C	101.65	52.8604	31.05	18.8443	intron_variant	pgm5	ENSCHAG00000025097
[truncated: 305 more rows]
