# Supplementary material for: Ecological adaptation in Atlantic herring is associated with large shifts in allele frequencies at hundreds of loci
Source: eLife journal article supplement (doi:10.7554/elife.61076), 2020-12-04
Supplement: supp [file elife-61076-supp-v1.zip › elife_poa_e61076_Supplementary_file_5.xlsx]

## Sheet: spawning.snp
Supplementary File 5. List of loci showing strong genetic differentiation between superpools of spring and autumn-spawning herring. The criteria for inclusion were raw P<10-30 for both comparisons (among Atlantic populations and among Baltic populations) or P<10-50 for a single comparison. These are the SNPs colored in red or black in Figure 3-figure supplement 3. Raw P-values are given in column…
CHR	POS	REF	ALT	log10P.Atlantic (raw)	log10P.Atlantic (adj)	log10P.Baltic (raw)	log10P.Baltic (adj)	SNP type	associated.gene.name	associated.gene.id
8	27790385	T	C	29.23	19.138	49.48	31.8585	intergenic_region	NSD-rab24	ENSCHAG00000027314-ENSCHAG00000000878
8	27790397	A	G	28.46	18.6338	54.39	35.0199	intergenic_region	NSD-rab24	ENSCHAG00000027314-ENSCHAG00000000878
10	25112397	C	G	7.42	4.85815	54.58	35.1422	upstream_gene_variant	si:dkey-44g17.6(GNG12)	ENSCHAG00000022120
10	25113770	C	T	6.93	4.53733	50.38	32.438	upstream_gene_variant	si:dkey-44g17.6(GNG12)	ENSCHAG00000022120
10	25114275	G	A	9.33	6.1087	51.7	33.2879	upstream_gene_variant	si:dkey-44g17.6(GNG12)	ENSCHAG00000022120
10	25119721	T	A	10.03	6.56701	51.26	33.0046	downstream_gene_variant	si:dkey-44g17.6(GNG12)	ENSCHAG00000022120
10	25120128	C	T	11.39	7.45745	54.13	34.8524	downstream_gene_variant	si:dkey-44g17.6(GNG12)	ENSCHAG00000022120
10	25120323	T	C	8.89	5.82061	54.33	34.9812	downstream_gene_variant	si:dkey-44g17.6(GNG12)	ENSCHAG00000022120
10	25121104	A	C	7.93	5.19206	56.97	36.681	downstream_gene_variant	si:dkey-44g17.6(GNG12)	ENSCHAG00000022120
10	25121658	C	G	8.25	5.40158	50.36	32.4251	downstream_gene_variant	si:dkey-44g17.6(GNG12)	ENSCHAG00000022120
10	25121733	A	G	8.78	5.74859	60.08	38.6834	downstream_gene_variant	si:dkey-44g17.6(GNG12)	ENSCHAG00000022120
10	25121734	A	C	8.41	5.50634	58.73	37.8142	downstream_gene_variant	si:dkey-44g17.6(GNG12)	ENSCHAG00000022120
10	25122080	A	C	8.26	5.40813	55.38	35.6573	downstream_gene_variant	si:dkey-44g17.6(GNG12)	ENSCHAG00000022120
10	25122091	A	G	7.88	5.15933	56.15	36.1531	downstream_gene_variant	si:dkey-44g17.6(GNG12)	ENSCHAG00000022120
10	25122242	C	A	8.81	5.76823	50.43	32.4701	downstream_gene_variant	si:dkey-44g17.6(GNG12)	ENSCHAG00000022120
10	25122445	A	G	8.86	5.80097	51.94	33.4424	downstream_gene_variant	gadd45ab	ENSCHAG00000022129
10	25122629	C	A	8.41	5.50634	59.6	38.3744	downstream_gene_variant	gadd45ab	ENSCHAG00000022129
10	25122689	A	G	8.26	5.40813	61.19	39.3981	downstream_gene_variant	gadd45ab	ENSCHAG00000022129
10	25123247	T	C	7.93	5.19206	52.84	34.0219	upstream_gene_variant	sec16b	ENSCHAG00000022133
10	25124273	A	C	8.3	5.43432	54.61	35.1615	upstream_gene_variant	sec16b	ENSCHAG00000022133
10	25124665	T	C	9.89	6.47535	50.09	32.2512	upstream_gene_variant	sec16b	ENSCHAG00000022133
10	25124701	C	T	8.86	5.80097	50.16	32.2963	upstream_gene_variant	sec16b	ENSCHAG00000022133
10	25126405	G	A	11.02	7.2152	50.05	32.2255	upstream_gene_variant	gadd45ab	ENSCHAG00000022129
10	25126586	C	G	10.62	6.95331	50.05	32.2255	upstream_gene_variant	gadd45ab	ENSCHAG00000022129
10	25126789	G	T	10.5	6.87474	53.29	34.3116	upstream_gene_variant	gadd45ab	ENSCHAG00000022129
10	25126809	C	T	11.63	7.61459	51.48	33.1462	upstream_gene_variant	gadd45ab	ENSCHAG00000022129
10	25127045	A	G	11.1	7.26758	53.96	34.743	upstream_gene_variant	gadd45ab	ENSCHAG00000022129
10	25127730	A	G	9.99	6.54082	52.88	34.0476	upstream_gene_variant	gadd45ab	ENSCHAG00000022129
10	25128044	T	C	9.96	6.52118	55.65	35.8311	upstream_gene_variant	gadd45ab	ENSCHAG00000022129
10	25128391	T	A	8.55	5.598	51.39	33.0883	missense_variant	sec16b	ENSCHAG00000022133
10	25129416	T	G	8.52	5.57836	61.25	39.4368	upstream_gene_variant	gadd45ab	ENSCHAG00000022129
10	25131166	G	A	9.66	6.32476	54.65	35.1873	upstream_gene_variant	gadd45ab	ENSCHAG00000022129
10	25131929	G	A	9.67	6.33131	50.82	32.7213	missense_variant	sec16b	ENSCHAG00000022133
10	25131988	T	G	10.14	6.63903	51.59	33.217	synonymous_variant	sec16b	ENSCHAG00000022133
10	25132669	C	A	9.09	5.95156	53.25	34.2858	intron_variant	sec16b	ENSCHAG00000022133
10	25132763	A	T	8.63	5.65038	53.73	34.5949	intron_variant	sec16b	ENSCHAG00000022133
10	25132791	C	T	7.97	5.21825	55.82	35.9406	intron_variant	sec16b	ENSCHAG00000022133
10	25133865	G	C	8.5	5.56526	54.76	35.2581	intron_variant	sec16b	ENSCHAG00000022133
10	25134993	A	C	6.87	4.49804	52.7	33.9317	intron_variant	sec16b	ENSCHAG00000022133
10	25135934	A	C	8.91	5.83371	54.24	34.9233	intron_variant	sec16b	ENSCHAG00000022133
10	25135938	C	T	9.11	5.96465	53.53	34.4661	intron_variant	sec16b	ENSCHAG00000022133
10	25136301	T	C	10.08	6.59975	55.98	36.0436	intron_variant	sec16b	ENSCHAG00000022133
10	25138792	C	G	12.23	8.00743	54.38	35.0134	intron_variant	sec16b	ENSCHAG00000022133
10	25139414	C	A	10.69	6.99914	52.86	34.0347	intron_variant	sec16b	ENSCHAG00000022133
10	25139537	C	T	11.14	7.29377	53.1	34.1893	missense_variant	sec16b	ENSCHAG00000022133
10	25139667	G	A	12.09	7.91577	52.82	34.009	intron_variant	sec16b	ENSCHAG00000022133
10	25140168	T	C	10.1	6.61284	60.74	39.1084	intron_variant	sec16b	ENSCHAG00000022133
10	25141802	C	T	10.05	6.58011	51.41	33.1011	intron_variant	sec16b	ENSCHAG00000022133
10	25142455	T	A	12.45	8.15147	57.99	37.3378	intron_variant	sec16b	ENSCHAG00000022133
10	25142588	T	A	13.92	9.11394	65.47	42.1539	intron_variant	sec16b	ENSCHAG00000022133
10	25143256	G	T	10.65	6.97295	63.91	41.1495	missense_variant	sec16b	ENSCHAG00000022133
10	25143257	C	T	10.85	7.1039	63.13	40.6472	synonymous_variant	sec16b	ENSCHAG00000022133
10	25143277	G	A	10.79	7.06461	59.33	38.2005	missense_variant	sec16b	ENSCHAG00000022133
10	25145370	T	A	12.45	8.15147	69.77	44.9225	downstream_gene_variant	sec16b	ENSCHAG00000022133
10	25145508	T	A	11.66	7.63423	64.9	41.7869	downstream_gene_variant	sec16b	ENSCHAG00000022133
10	25145591	A	C	11.6	7.59495	58.26	37.5116	downstream_gene_variant	sec16b	ENSCHAG00000022133
10	25145928	G	T	11.78	7.7128	51.39	33.0883	downstream_gene_variant	sec16b	ENSCHAG00000022133
10	25146664	G	T	10.99	7.19556	60.52	38.9668	downstream_gene_variant	sec16b	ENSCHAG00000022133
10	25146711	T	A	11.95	7.82411	59.4	38.2456	downstream_gene_variant	sec16b	ENSCHAG00000022133
10	25146846	C	A	10.96	7.17592	56.43	36.3333	downstream_gene_variant	sec16b	ENSCHAG00000022133
10	25146950	A	G	12.13	7.94196	58.55	37.6983	downstream_gene_variant	sec16b	ENSCHAG00000022133
10	25147009	A	G	11.13	7.28722	53.1	34.1893	downstream_gene_variant	sec16b	ENSCHAG00000022133
10	25148933	C	T	9.55	6.25274	61.38	39.5205	downstream_gene_variant	sec16b	ENSCHAG00000022133
10	25148987	C	A	10.39	6.80272	56.49	36.372	downstream_gene_variant	sec16b	ENSCHAG00000022133
10	25149080	C	A	12.53	8.20385	61.18	39.3917	downstream_gene_variant	sec16b	ENSCHAG00000022133
10	25149367	T	C	10.65	6.97295	51.75	33.32	intergenic_region	sec16b-znf648	ENSCHAG00000022133-ENSCHAG00000022182
10	25150048	A	T	10	6.54737	64.74	41.6839	intergenic_region	sec16b-znf648	ENSCHAG00000022133-ENSCHAG00000022182
10	25150073	C	A	9.6	6.28547	60.24	38.7865	intergenic_region	sec16b-znf648	ENSCHAG00000022133-ENSCHAG00000022182
10	25150137	A	G	9.1	5.95811	66.52	42.8299	intergenic_region	sec16b-znf648	ENSCHAG00000022133-ENSCHAG00000022182
10	25150457	A	T	11.14	7.29377	55.63	35.8182	intergenic_region	sec16b-znf648	ENSCHAG00000022133-ENSCHAG00000022182
10	25150559	G	C	11.12	7.28067	56.91	36.6424	intergenic_region	sec16b-znf648	ENSCHAG00000022133-ENSCHAG00000022182
10	25150617	T	C	10.03	6.56701	63.2	40.6923	intergenic_region	sec16b-znf648	ENSCHAG00000022133-ENSCHAG00000022182
10	25150643	T	C	10.02	6.56046	61.12	39.3531	intergenic_region	sec16b-znf648	ENSCHAG00000022133-ENSCHAG00000022182
10	25150644	G	A	10.22	6.69141	61.81	39.7973	intergenic_region	sec16b-znf648	ENSCHAG00000022133-ENSCHAG00000022182
10	25150791	A	C	11.29	7.39198	64.03	41.2267	intergenic_region	sec16b-znf648	ENSCHAG00000022133-ENSCHAG00000022182
10	25150837	T	G	11.93	7.81101	55.06	35.4512	intergenic_region	sec16b-znf648	ENSCHAG00000022133-ENSCHAG00000022182
10	25150838	T	C	11.96	7.83065	54.47	35.0714	intergenic_region	sec16b-znf648	ENSCHAG00000022133-ENSCHAG00000022182
10	25150858	C	T	11.49	7.52293	55.96	36.0307	intergenic_region	sec16b-znf648	ENSCHAG00000022133-ENSCHAG00000022182
10	25150935	C	A	11.1	7.26758	64.43	41.4843	intergenic_region	sec16b-znf648	ENSCHAG00000022133-ENSCHAG00000022182
10	25150938	G	T	10.81	7.07771	60.72	39.0955	intergenic_region	sec16b-znf648	ENSCHAG00000022133-ENSCHAG00000022182
10	25150944	G	A	10.79	7.06461	65.32	42.0573	intergenic_region	sec16b-znf648	ENSCHAG00000022133-ENSCHAG00000022182
10	25151587	T	C	11.42	7.4771	50.8	32.7084	intergenic_region	sec16b-znf648	ENSCHAG00000022133-ENSCHAG00000022182
10	25151719	T	G	10.17	6.65867	56.27	36.2303	intergenic_region	sec16b-znf648	ENSCHAG00000022133-ENSCHAG00000022182
10	25151721	G	T	10.06	6.58665	56.2	36.1853	intergenic_region	sec16b-znf648	ENSCHAG00000022133-ENSCHAG00000022182
10	25151800	G	A	10.91	7.14318	59.98	38.6191	intergenic_region	sec16b-znf648	ENSCHAG00000022133-ENSCHAG00000022182
10	25151866	T	C	10.61	6.94676	57.22	36.842	intergenic_region	sec16b-znf648	ENSCHAG00000022133-ENSCHAG00000022182
10	25151881	A	C	10.8	7.07116	54.89	35.3418	intergenic_region	sec16b-znf648	ENSCHAG00000022133-ENSCHAG00000022182
10	25151949	T	A	10.11	6.61939	57.85	37.2476	upstream_gene_variant	znf648	ENSCHAG00000022182
10	25151955	G	A	10	6.54737	55.83	35.947	upstream_gene_variant	znf648	ENSCHAG00000022182
10	25151959	T	G	10.05	6.58011	57.09	36.7583	upstream_gene_variant	znf648	ENSCHAG00000022182
10	25152073	A	G	11.04	7.2283	62.01	39.9261	upstream_gene_variant	znf648	ENSCHAG00000022182
10	25152081	G	T	11.5	7.52947	61.72	39.7394	upstream_gene_variant	znf648	ENSCHAG00000022182
10	25152100	C	A	12.04	7.88303	60.44	38.9152	upstream_gene_variant	znf648	ENSCHAG00000022182
10	25152110	T	C	11.51	7.53602	57.54	37.048	upstream_gene_variant	znf648	ENSCHAG00000022182
10	25152938	A	C	10.24	6.70451	62.71	40.3768	upstream_gene_variant	znf648	ENSCHAG00000022182
10	25152972	C	A	8.13	5.32301	62.65	40.3382	upstream_gene_variant	znf648	ENSCHAG00000022182
10	25153141	G	A	10.81	7.07771	63.77	41.0593	upstream_gene_variant	znf648	ENSCHAG00000022182
10	25153224	C	T	12.12	7.93541	56.01	36.0629	upstream_gene_variant	znf648	ENSCHAG00000022182
10	25153435	A	C	12.75	8.3479	54.76	35.2581	upstream_gene_variant	znf648	ENSCHAG00000022182
10	25154062	A	C	10.58	6.92712	61.29	39.4625	upstream_gene_variant	znf648	ENSCHAG00000022182
10	25154174	A	C	11.59	7.5884	55.95	36.0243	upstream_gene_variant	znf648	ENSCHAG00000022182
10	25154252	A	C	11.38	7.45091	54.86	35.3225	upstream_gene_variant	znf648	ENSCHAG00000022182
10	25154511	A	T	8.92	5.84025	66.56	42.8557	upstream_gene_variant	znf648	ENSCHAG00000022182
10	25154589	A	G	10.84	7.09735	58.65	37.7627	upstream_gene_variant	znf648	ENSCHAG00000022182
10	25154855	G	C	10.17	6.65867	58.86	37.8979	upstream_gene_variant	znf648	ENSCHAG00000022182
10	25154875	T	G	10.37	6.78962	56.27	36.2303	upstream_gene_variant	znf648	ENSCHAG00000022182
10	25155126	C	A	9	5.89263	59.41	38.2521	upstream_gene_variant	znf648	ENSCHAG00000022182
10	25155164	T	C	8.92	5.84025	60.86	39.1857	upstream_gene_variant	znf648	ENSCHAG00000022182
10	25155291	T	G	10.2	6.67832	61.56	39.6364	upstream_gene_variant	znf648	ENSCHAG00000022182
10	25155681	T	G	8.95	5.8599	56.82	36.5844	upstream_gene_variant	znf648	ENSCHAG00000022182
10	25155687	T	C	9.01	5.89918	57.48	37.0094	upstream_gene_variant	znf648	ENSCHAG00000022182
10	25155708	T	A	10.13	6.63249	54.23	34.9168	upstream_gene_variant	znf648	ENSCHAG00000022182
10	25155711	A	G	10.28	6.7307	55.67	35.844	upstream_gene_variant	znf648	ENSCHAG00000022182
10	25156672	G	T	11.41	7.47055	50.63	32.5989	upstream_gene_variant	znf648	ENSCHAG00000022182
10	25156925	T	C	10	6.54737	53.1	34.1893	missense_variant	znf648	ENSCHAG00000022182
10	25157400	C	T	12.66	8.28897	51.43	33.114	synonymous_variant	znf648	ENSCHAG00000022182
10	25158562	T	C	9.06	5.93192	54.17	34.8782	synonymous_variant	znf648	ENSCHAG00000022182
10	25158810	A	G	10.22	6.69141	54.2	34.8975	downstream_gene_variant	znf648	ENSCHAG00000022182
10	25159678	T	C	10.72	7.01878	56.4	36.314	downstream_gene_variant	znf648	ENSCHAG00000022182
10	25159925	G	T	11.77	7.70625	60.3	38.8251	downstream_gene_variant	znf648	ENSCHAG00000022182
10	25160048	C	T	9.63	6.30512	54.01	34.7752	downstream_gene_variant	znf648	ENSCHAG00000022182
10	25160732	A	G	10.46	6.84855	56.5	36.3784	downstream_gene_variant	znf648	ENSCHAG00000022182
10	25160899	A	T	9.12	5.9712	53.63	34.5305	downstream_gene_variant	znf648	ENSCHAG00000022182
10	25160918	T	C	8.1	5.30337	55.77	35.9084	downstream_gene_variant	znf648	ENSCHAG00000022182
10	25161932	C	A	11.17	7.31341	50.98	32.8243	downstream_gene_variant	znf648	ENSCHAG00000022182
10	25161965	A	C	10.17	6.65867	51.94	33.4424	downstream_gene_variant	znf648	ENSCHAG00000022182
10	25161998	T	G	11.21	7.3396	54.66	35.1937	downstream_gene_variant	znf648	ENSCHAG00000022182
10	25162000	T	C	10.9	7.13663	55.38	35.6573	downstream_gene_variant	znf648	ENSCHAG00000022182
10	25162114	G	A	11.61	7.6015	55.37	35.6508	downstream_gene_variant	znf648	ENSCHAG00000022182
10	25162253	C	T	9.04	5.91882	54.24	34.9233	downstream_gene_variant	znf648	ENSCHAG00000022182
10	25162331	C	A	10.72	7.01878	59.82	38.516	downstream_gene_variant	znf648	ENSCHAG00000022182
10	25163022	A	T	10.96	7.17592	56.12	36.1337	downstream_gene_variant	znf648	ENSCHAG00000022182
10	25163140	T	C	10.02	6.56046	63.78	41.0658	downstream_gene_variant	znf648	ENSCHAG00000022182
10	25163416	A	G	10.98	7.18901	62.79	40.4283	downstream_gene_variant	znf648	ENSCHAG00000022182
10	25163440	C	A	10.97	7.18246	63.41	40.8275	downstream_gene_variant	znf648	ENSCHAG00000022182
10	25164298	A	C	9.15	5.99084	51.65	33.2557	intergenic_region	znf648-glula	ENSCHAG00000022182-ENSCHAG00000022196
10	25164928	C	T	10	6.54737	65.7	42.302	intergenic_region	znf648-glula	ENSCHAG00000022182-ENSCHAG00000022196
10	25165089	A	G	10.11	6.61939	58.6	37.7305	intergenic_region	znf648-glula	ENSCHAG00000022182-ENSCHAG00000022196
10	25165123	A	G	8.7	5.69621	55.55	35.7667	intergenic_region	znf648-glula	ENSCHAG00000022182-ENSCHAG00000022196
10	25165463	G	T	11.37	7.44436	58.64	37.7563	intergenic_region	znf648-glula	ENSCHAG00000022182-ENSCHAG00000022196
10	25165703	A	C	10.05	6.58011	59.02	38.001	intergenic_region	znf648-glula	ENSCHAG00000022182-ENSCHAG00000022196
10	25166427	C	G	9.24	6.04977	55.15	35.5092	intergenic_region	znf648-glula	ENSCHAG00000022182-ENSCHAG00000022196
10	25167031	A	G	10.38	6.79617	54.09	34.8267	intergenic_region	znf648-glula	ENSCHAG00000022182-ENSCHAG00000022196
10	25167177	C	A	9.83	6.43606	64.17	41.3169	intergenic_region	znf648-glula	ENSCHAG00000022182-ENSCHAG00000022196
10	25167221	A	G	10.87	7.11699	58.54	37.6919	intergenic_region	znf648-glula	ENSCHAG00000022182-ENSCHAG00000022196
10	25168319	T	A	8.12	5.31646	65.38	42.0959	intergenic_region	znf648-glula	ENSCHAG00000022182-ENSCHAG00000022196
10	25169678	T	C	8.36	5.4736	50.15	32.2899	intergenic_region	znf648-glula	ENSCHAG00000022182-ENSCHAG00000022196
10	25170249	T	G	7.46	4.88434	52.05	33.5132	intergenic_region	znf648-glula	ENSCHAG00000022182-ENSCHAG00000022196
12	15564800	T	C	5.22	3.41773	50.35	32.4186	upstream_gene_variant	snrnp35	ENSCHAG00000022773
12	15566104	C	A	6.77	4.43257	50.18	32.3092	downstream_gene_variant	kmt5aa	ENSCHAG00000022764
12	15567410	C	T	5.65	3.69926	51.99	33.4746	downstream_gene_variant	kmt5aa	ENSCHAG00000022764
12	15569133	C	G	7.1	4.64863	59.75	38.471	3_prime_UTR_variant	RILPL1	ENSCHAG00000022779
12	15569135	A	G	6.12	4.00699	58.09	37.4022	3_prime_UTR_variant	RILPL1	ENSCHAG00000022779
12	15570264	G	A	5.08	3.32606	51.73	33.3072	downstream_gene_variant	snrnp35	ENSCHAG00000022773
12	15574503	A	G	6.2	4.05937	50.66	32.6182	downstream_gene_variant	HIP1R	ENSCHAG00000022816
12	15575078	T	G	5.12	3.35225	51.32	33.0432	downstream_gene_variant	HIP1R	ENSCHAG00000022816
12	15575081	C	G	5.5	3.60105	53.1	34.1893	downstream_gene_variant	HIP1R	ENSCHAG00000022816
12	15575109	G	A	5.25	3.43737	51.96	33.4553	downstream_gene_variant	HIP1R	ENSCHAG00000022816
12	15575155	T	A	5.8	3.79747	55.61	35.8054	downstream_gene_variant	HIP1R	ENSCHAG00000022816
12	15575156	A	T	5.7	3.732	55.25	35.5736	downstream_gene_variant	HIP1R	ENSCHAG00000022816
12	15575206	A	G	6.05	3.96116	53.59	34.5048	downstream_gene_variant	HIP1R	ENSCHAG00000022816
12	15575833	A	C	4.18	2.7368	56.64	36.4686	downstream_gene_variant	HIP1R	ENSCHAG00000022816
12	15580302	T	C	6.58	4.30817	52.65	33.8995	synonymous_variant	HIP1R	ENSCHAG00000022816
12	15582396	A	C	4.18	2.7368	51.18	32.953	upstream_gene_variant	RILPL1	ENSCHAG00000022779
12	15584866	A	G	3.29	2.15408	51.28	33.0174	intron_variant	HIP1R	ENSCHAG00000022816
12	15585189	T	C	5.67	3.71236	50.97	32.8178	intron_variant	HIP1R	ENSCHAG00000022816
12	15585199	G	A	6.45	4.22305	51.52	33.172	intron_variant	HIP1R	ENSCHAG00000022816
12	15591890	T	G	4.71	3.08381	53.06	34.1635	intron_variant	HIP1R	ENSCHAG00000022816
12	15593401	A	G	6.28	4.11175	51	32.8371	downstream_gene_variant	ccdc62	ENSCHAG00000022863
12	15595823	A	C	5.23	3.42427	53.32	34.3309	downstream_gene_variant	unannotated gene	ENSCHAG00000022873
12	15598424	G	A	5.37	3.51594	50.83	32.7277	missense_variant&splice_region_variant	ccdc62	ENSCHAG00000022863
12	15598694	G	T	4.73	3.09691	54.06	34.8074	missense_variant	ccdc62	ENSCHAG00000022863
12	15599481	T	C	5.21	3.41118	56.86	36.6102	upstream_gene_variant	HIP1R	ENSCHAG00000022816
12	15600140	G	C	5.83	3.81712	55.07	35.4577	missense_variant	unannotated gene	ENSCHAG00000022873
12	15605083	A	T	4.32	2.82846	56.7	36.5072	upstream_gene_variant	unannotated gene	ENSCHAG00000022873
12	15605786	A	T	5.63	3.68617	50.03	32.2126	upstream_gene_variant	unannotated gene	ENSCHAG00000022873
12	15609316	T	C	8.93	5.8468	55.06	35.4512	upstream_gene_variant	ccdc62	ENSCHAG00000022863
12	15609556	C	T	7.42	4.85815	53.1	34.1893	upstream_gene_variant	ccdc62	ENSCHAG00000022863
12	15613109	C	T	6.55	4.28853	54.26	34.9362	upstream_gene_variant	ccdc62	ENSCHAG00000022863
12	15614605	A	C	5.66	3.70581	51.46	33.1333	upstream_gene_variant	unannotated gene	ENSCHAG00000022889
12	15614720	A	G	6.73	4.40638	57.18	36.8162	upstream_gene_variant	unannotated gene	ENSCHAG00000022889
12	15614790	T	C	6.16	4.03318	55.33	35.6251	upstream_gene_variant	unannotated gene	ENSCHAG00000022889
12	15614862	G	T	5.08	3.32606	54.85	35.316	upstream_gene_variant	unannotated gene	ENSCHAG00000022889
12	15615143	A	G	6.88	4.50459	54.02	34.7816	upstream_gene_variant	unannotated gene	ENSCHAG00000022889
12	15615924	A	G	6.14	4.02008	52.52	33.8158	upstream_gene_variant	unannotated gene	ENSCHAG00000022889
12	15615959	A	T	5.37	3.51594	51.76	33.3265	upstream_gene_variant	unannotated gene	ENSCHAG00000022889
12	15616222	C	A	7.08	4.63554	52.86	34.0347	upstream_gene_variant	unannotated gene	ENSCHAG00000022889
12	15617121	C	T	6.42	4.20341	53.53	34.4661	upstream_gene_variant	unannotated gene	ENSCHAG00000022889
12	15620855	A	T	5.18	3.39154	56.48	36.3655	downstream_gene_variant	unannotated gene	ENSCHAG00000022889
12	15621355	G	A	5.33	3.48975	50.31	32.3929	downstream_gene_variant	unannotated gene	ENSCHAG00000022889
12	15621455	T	G	6.19	4.05282	51.79	33.3458	downstream_gene_variant	unannotated gene	ENSCHAG00000022889
12	15621505	C	T	6.44	4.21651	55.84	35.9535	downstream_gene_variant	unannotated gene	ENSCHAG00000022889
12	15627165	T	A	6.88	4.50459	51.19	32.9595	intergenic_region	unannotated gene-BCL7A	ENSCHAG00000022889-ENSCHAG00000022893
12	15627991	T	A	5.23	3.42427	56.57	36.4235	intergenic_region	unannotated gene-BCL7A	ENSCHAG00000022889-ENSCHAG00000022893
12	15628009	T	C	5.53	3.6207	51.13	32.9209	intergenic_region	unannotated gene-BCL7A	ENSCHAG00000022889-ENSCHAG00000022893
12	15628393	T	G	5.3	3.47011	56.27	36.2303	intergenic_region	unannotated gene-BCL7A	ENSCHAG00000022889-ENSCHAG00000022893
12	15628570	A	T	5.99	3.92187	60.12	38.7092	intergenic_region	unannotated gene-BCL7A	ENSCHAG00000022889-ENSCHAG00000022893
12	15630890	T	A	5.88	3.84985	53.24	34.2794	intergenic_region	unannotated gene-BCL7A	ENSCHAG00000022889-ENSCHAG00000022893
12	15633269	A	C	5.64	3.69272	53.43	34.4017	intergenic_region	unannotated gene-BCL7A	ENSCHAG00000022889-ENSCHAG00000022893
12	15633792	A	G	4.79	3.13619	50.76	32.6826	intergenic_region	unannotated gene-BCL7A	ENSCHAG00000022889-ENSCHAG00000022893
12	15634417	T	C	6.86	4.4915	55.63	35.8182	intergenic_region	unannotated gene-BCL7A	ENSCHAG00000022889-ENSCHAG00000022893
12	15634888	A	C	6.77	4.43257	56.34	36.2754	intergenic_region	unannotated gene-BCL7A	ENSCHAG00000022889-ENSCHAG00000022893
12	15635073	G	C	6.46	4.2296	58	37.3442	intergenic_region	unannotated gene-BCL7A	ENSCHAG00000022889-ENSCHAG00000022893
12	15636105	G	A	4.81	3.14928	53.71	34.582	intergenic_region	unannotated gene-BCL7A	ENSCHAG00000022889-ENSCHAG00000022893
12	15640325	T	C	5.57	3.64688	51.88	33.4038	intergenic_region	unannotated gene-BCL7A	ENSCHAG00000022889-ENSCHAG00000022893
12	15640808	T	G	6.65	4.354	50.44	32.4766	intergenic_region	unannotated gene-BCL7A	ENSCHAG00000022889-ENSCHAG00000022893
12	15641286	A	G	5.53	3.6207	55.32	35.6186	intergenic_region	unannotated gene-BCL7A	ENSCHAG00000022889-ENSCHAG00000022893
12	15641510	A	T	6.45	4.22305	55.5	35.7345	intergenic_region	unannotated gene-BCL7A	ENSCHAG00000022889-ENSCHAG00000022893
12	15641642	G	A	6.48	4.2427	57.55	37.0545	intergenic_region	unannotated gene-BCL7A	ENSCHAG00000022889-ENSCHAG00000022893
12	15641815	T	C	5.59	3.65998	56.77	36.5523	intergenic_region	unannotated gene-BCL7A	ENSCHAG00000022889-ENSCHAG00000022893
12	15641894	C	A	4.5	2.94632	54.07	34.8138	intergenic_region	unannotated gene-BCL7A	ENSCHAG00000022889-ENSCHAG00000022893
12	15643094	T	C	6.64	4.34745	50.66	32.6182	intergenic_region	unannotated gene-BCL7A	ENSCHAG00000022889-ENSCHAG00000022893
12	15643635	C	T	4.86	3.18202	54.64	35.1808	intergenic_region	unannotated gene-BCL7A	ENSCHAG00000022889-ENSCHAG00000022893
12	15646506	T	C	5.95	3.89568	50.47	32.4959	downstream_gene_variant	BCL7A	ENSCHAG00000022893
12	15647053	G	A	6.39	4.18377	51.05	32.8693	downstream_gene_variant	BCL7A	ENSCHAG00000022893
12	15648447	G	A	6.39	4.18377	56.3	36.2496	downstream_gene_variant	BCL7A	ENSCHAG00000022893
12	15649807	T	C	6.07	3.97425	51.29	33.0239	downstream_gene_variant	BCL7A	ENSCHAG00000022893
12	15650467	T	C	5.49	3.59451	53.25	34.2858	downstream_gene_variant	ddx55	ENSCHAG00000022912
12	15650747	A	G	7.33	4.79922	58.22	37.4859	downstream_gene_variant	ddx55	ENSCHAG00000022912
12	15650908	G	A	7.19	4.70756	66.43	42.772	synonymous_variant	BCL7A	ENSCHAG00000022893
12	15650959	G	A	7.3	4.77958	66.13	42.5788	synonymous_variant	BCL7A	ENSCHAG00000022893
12	15652228	G	A	8.07	5.28373	60.07	38.677	downstream_gene_variant	ddx55	ENSCHAG00000022912
12	15652850	A	C	5.13	3.3588	51.12	32.9144	upstream_gene_variant	BCL7A	ENSCHAG00000022893
12	15652986	T	G	6.76	4.42602	52.32	33.6871	upstream_gene_variant	BCL7A	ENSCHAG00000022893
12	15653991	T	A	5.98	3.91533	52.25	33.642	missense_variant	ddx55	ENSCHAG00000022912
12	15654127	T	C	5.29	3.46356	50.83	32.7277	synonymous_variant	ddx55	ENSCHAG00000022912
12	15654794	G	A	6.43	4.20996	58.97	37.9688	upstream_gene_variant	BCL7A	ENSCHAG00000022893
12	15655678	C	G	6.41	4.19686	52.23	33.6291	upstream_gene_variant	BCL7A	ENSCHAG00000022893
12	15656207	T	G	7.91	5.17897	58.72	37.8078	upstream_gene_variant	BCL7A	ENSCHAG00000022893
12	15656369	T	C	6	3.92842	60.18	38.7478	upstream_gene_variant	BCL7A	ENSCHAG00000022893
12	15656932	T	G	5.51	3.6076	52.38	33.7257	upstream_gene_variant	BCL7A	ENSCHAG00000022893
12	15657666	G	C	6.8	4.45221	62.37	40.1579	downstream_gene_variant	tmed2	ENSCHAG00000023345
12	15658782	G	C	7.94	5.19861	62.3	40.1128	upstream_gene_variant	ddx55	ENSCHAG00000022912
12	15659119	A	T	8.11	5.30992	54.47	35.0714	upstream_gene_variant	ddx55	ENSCHAG00000022912
12	15659676	G	T	7.16	4.68792	62.33	40.1321	upstream_gene_variant	ddx55	ENSCHAG00000022912
12	15660272	T	C	5.95	3.89568	54.38	35.0134	synonymous_variant	tmed2	ENSCHAG00000023345
12	15660617	A	G	7.69	5.03493	62.32	40.1257	upstream_gene_variant	ddx55	ENSCHAG00000022912
12	15660807	C	T	8.38	5.4867	56.72	36.5201	upstream_gene_variant	ddx55	ENSCHAG00000022912
12	15660809	A	C	8.54	5.59145	61.14	39.3659	upstream_gene_variant	ddx55	ENSCHAG00000022912
12	15660816	G	C	7.83	5.12659	61.39	39.5269	upstream_gene_variant	ddx55	ENSCHAG00000022912
12	15661197	T	C	5.71	3.73855	57.36	36.9321	upstream_gene_variant	ddx55	ENSCHAG00000022912
12	15662643	A	G	6.7	4.38674	57.85	37.2476	upstream_gene_variant	ddx55	ENSCHAG00000022912
12	15663610	T	A	7.27	4.75994	63.09	40.6215	upstream_gene_variant	tmed2	ENSCHAG00000023345
12	15664331	G	T	7.02	4.59625	55.2	35.5414	synonymous_variant	ptpn11a	ENSCHAG00000023368
12	15668156	A	C	7.03	4.6028	58.81	37.8657	downstream_gene_variant	ptpn11a	ENSCHAG00000023368
12	15669325	A	T	6.75	4.41947	56.4	36.314	downstream_gene_variant	ptpn11a	ENSCHAG00000023368
12	15669726	A	G	5.41	3.54213	58.1	37.4086	downstream_gene_variant	ptpn11a	ENSCHAG00000023368
12	15669943	T	C	4.83	3.16238	59.94	38.5933	downstream_gene_variant	ptpn11a	ENSCHAG00000023368
12	15670309	T	C	5.42	3.54867	50.86	32.747	downstream_gene_variant	ptpn11a	ENSCHAG00000023368
12	15672112	G	T	6.3	4.12484	52.55	33.8351	upstream_gene_variant	CYP2D14	ENSCHAG00000023562
12	15672459	G	A	7.92	5.18552	53.27	34.2987	upstream_gene_variant	CYP2D14	ENSCHAG00000023562
12	15677521	A	G	5.46	3.57486	52.85	34.0283	missense_variant	CYP2D14	ENSCHAG00000023562
12	15677538	T	C	6.28	4.11175	52.9	34.0605	downstream_gene_variant	ptpn11a	ENSCHAG00000023368
12	15677945	G	A	6.26	4.09865	53.95	34.7366	missense_variant	CYP2D14	ENSCHAG00000023562
12	15680111	C	T	5.45	3.56832	55.38	35.6573	intron_variant	CYP2D14	ENSCHAG00000023562
12	15680402	G	A	5.68	3.71891	52.57	33.848	intron_variant	CYP2D14	ENSCHAG00000023562
12	15680408	A	C	5.01	3.28023	55.03	35.4319	upstream_gene_variant	SCD5	ENSCHAG00000023635
12	15680476	A	T	7.3	4.77958	61.91	39.8617	upstream_gene_variant	SCD5	ENSCHAG00000023635
12	15680550	C	T	6.88	4.50459	53.43	34.4017	synonymous_variant	CYP2D14	ENSCHAG00000023562
12	15681653	G	A	7.11	4.65518	54.07	34.8138	missense_variant	CYP2D14	ENSCHAG00000023562
12	15682082	A	T	6	3.92842	53.06	34.1635	upstream_gene_variant	SCD5	ENSCHAG00000023635
12	15683675	C	T	5.15	3.3719	63.3	40.7567	upstream_gene_variant	SCD5	ENSCHAG00000023635
12	15683747	T	C	5.75	3.76474	52.49	33.7965	upstream_gene_variant	SCD5	ENSCHAG00000023635
12	15684333	A	G	5.52	3.61415	57.27	36.8742	upstream_gene_variant	SCD5	ENSCHAG00000023635
12	15684621	C	T	6.32	4.13794	61.1	39.3402	upstream_gene_variant	SCD5	ENSCHAG00000023635
12	15685093	A	C	5.06	3.31297	57.13	36.784	upstream_gene_variant	SCD5	ENSCHAG00000023635
12	15685282	C	G	7.23	4.73375	60.35	38.8573	upstream_gene_variant	SCD5	ENSCHAG00000023635
12	15685463	A	G	7.19	4.70756	53.02	34.1378	missense_variant	SCD5	ENSCHAG00000023635
12	15685868	G	A	5.41	3.54213	57.8	37.2154	downstream_gene_variant	CYP2D14	ENSCHAG00000023562
12	15685973	T	C	6.25	4.09211	50.73	32.6633	downstream_gene_variant	CYP2D14	ENSCHAG00000023562
12	15686317	G	C	5.58	3.65343	58.26	37.5116	downstream_gene_variant	CYP2D14	ENSCHAG00000023562
12	15686447	A	C	7.1	4.64863	60.48	38.941	downstream_gene_variant	CYP2D14	ENSCHAG00000023562
12	15686776	C	T	5.95	3.89568	58.15	37.4408	downstream_gene_variant	CYP2D14	ENSCHAG00000023562
12	15687346	A	G	5.41	3.54213	55.23	35.5607	synonymous_variant	SCD5	ENSCHAG00000023635
12	15687451	A	T	7.23	4.73375	57.1	36.7647	downstream_gene_variant	CYP2D14	ENSCHAG00000023562
12	15687884	C	T	7.39	4.83851	66.69	42.9394	downstream_gene_variant	CYP2D14	ENSCHAG00000023562
12	15687949	G	C	6.59	4.31472	63.7	41.0142	downstream_gene_variant	CYP2D14	ENSCHAG00000023562
12	15688326	C	T	6.22	4.07246	54.87	35.3289	missense_variant	SCD5	ENSCHAG00000023635
12	15688955	G	T	5.77	3.77783	53.45	34.4146	3_prime_UTR_variant	SCD5	ENSCHAG00000023635
12	15688974	A	G	6.13	4.01354	51.57	33.2042	3_prime_UTR_variant	SCD5	ENSCHAG00000023635
12	15689056	A	T	7.11	4.65518	58.54	37.6919	3_prime_UTR_variant	SCD5	ENSCHAG00000023635
12	15689279	A	G	6.08	3.9808	52.14	33.5712	downstream_gene_variant	SCD5	ENSCHAG00000023635
12	15689340	A	C	2.87	1.87909	56.2	36.1853	downstream_gene_variant	SCD5	ENSCHAG00000023635
12	15689394	G	C	5.48	3.58796	57.34	36.9193	downstream_gene_variant	SCD5	ENSCHAG00000023635
12	15689518	C	T	6.61	4.32781	67.29	43.3257	downstream_gene_variant	SCD5	ENSCHAG00000023635
12	15690448	G	A	8.22	5.38194	64.63	41.613	downstream_gene_variant	SCD5	ENSCHAG00000023635
12	15690812	C	T	6.33	4.14448	55.76	35.9019	downstream_gene_variant	SCD5	ENSCHAG00000023635
12	15690893	T	C	6.43	4.20996	67.27	43.3128	downstream_gene_variant	SCD5	ENSCHAG00000023635
12	15691119	G	A	7.57	4.95636	60.51	38.9603	downstream_gene_variant	SCD5	ENSCHAG00000023635
12	15692017	T	A	6.19	4.05282	58.81	37.8657	downstream_gene_variant	SCD5	ENSCHAG00000023635
12	15692253	G	A	6.44	4.21651	56.09	36.1144	downstream_gene_variant	SCD5	ENSCHAG00000023635
12	15692372	G	T	6.23	4.07901	70.41	45.3346	downstream_gene_variant	SCD5	ENSCHAG00000023635
12	15693179	A	G	2.88	1.88564	66.68	42.933	downstream_gene_variant	SCD5	ENSCHAG00000023635
12	15693326	G	A	4.92	3.22131	63.16	40.6666	downstream_gene_variant	SCD5	ENSCHAG00000023635
12	15693862	G	A	8.51	5.57181	60.1	38.6963	downstream_gene_variant	SCD5	ENSCHAG00000023635
12	15696010	G	A	7.77	5.08731	50.32	32.3993	upstream_gene_variant	tmem150c	ENSCHAG00000023639
12	15696706	G	T	5.85	3.83021	67.02	43.1519	upstream_gene_variant	tmem150c	ENSCHAG00000023639
12	15696719	A	G	7.95	5.20516	66.34	42.714	upstream_gene_variant	tmem150c	ENSCHAG00000023639
12	15697367	G	A	7.19	4.70756	62.31	40.1193	upstream_gene_variant	tmem150c	ENSCHAG00000023639
12	15698802	G	A	7.44	4.87124	66.94	43.1004	upstream_gene_variant	tmem150c	ENSCHAG00000023639
12	15698817	G	A	7.34	4.80577	67.27	43.3128	upstream_gene_variant	tmem150c	ENSCHAG00000023639
12	15698881	A	T	6.36	4.16413	59.77	38.4839	upstream_gene_variant	tmem150c	ENSCHAG00000023639
12	15699329	A	G	7.1	4.64863	52.48	33.7901	downstream_gene_variant	enoph1	ENSCHAG00000002350
12	15700828	G	A	6.3	4.12484	58.95	37.9559	downstream_gene_variant	enoph1	ENSCHAG00000002350
12	15700873	A	T	6.91	4.52423	58.4	37.6018	downstream_gene_variant	enoph1	ENSCHAG00000002350
12	15701279	T	A	7.13	4.66827	53.99	34.7623	missense_variant	tmem150c	ENSCHAG00000023639
12	15701299	C	T	6.41	4.19686	51.57	33.2042	synonymous_variant	tmem150c	ENSCHAG00000023639
12	15701324	A	G	6.47	4.23615	54.33	34.9812	missense_variant	tmem150c	ENSCHAG00000023639
12	15701571	A	G	6.54	4.28198	67.52	43.4738	downstream_gene_variant	tmem150c	ENSCHAG00000023639
12	15702993	G	C	6.37	4.17067	77.37	49.8159	downstream_gene_variant	tmem150c	ENSCHAG00000023639
12	15703210	C	T	7.37	4.82541	74.55	48.0002	upstream_gene_variant	hnrnpdl	ENSCHAG00000002440
12	15703578	T	C	8.41	5.50634	73.9	47.5817	upstream_gene_variant	hnrnpdl	ENSCHAG00000002440
12	15703754	G	A	6.9	4.51768	70.08	45.1221	synonymous_variant	enoph1	ENSCHAG00000002350
12	15703805	C	T	7.08	4.63554	64.5	41.5293	upstream_gene_variant	hnrnpdl	ENSCHAG00000002440
12	15703925	T	A	5.59	3.65998	68.68	44.2207	upstream_gene_variant	hnrnpdl	ENSCHAG00000002440
12	15703994	G	C	7.08	4.63554	68.27	43.9567	upstream_gene_variant	hnrnpdl	ENSCHAG00000002440
12	15704354	C	A	5.79	3.79093	73.36	47.234	missense_variant	enoph1	ENSCHAG00000002350
12	15704771	T	C	3.45	2.25884	60.4	38.8895	upstream_gene_variant	hnrnpdl	ENSCHAG00000002440
12	15704795	A	G	7.03	4.6028	70.5	45.3925	upstream_gene_variant	hnrnpdl	ENSCHAG00000002440
12	15704858	A	C	7.74	5.06766	66.45	42.7849	upstream_gene_variant	hnrnpdl	ENSCHAG00000002440
12	15705235	G	T	6.87	4.49804	75.73	48.7599	upstream_gene_variant	hnrnpdl	ENSCHAG00000002440
12	15705290	G	T	7.42	4.85815	73.08	47.0537	upstream_gene_variant	hnrnpdl	ENSCHAG00000002440
12	15705787	T	G	6.74	4.41293	83.74	53.9173	upstream_gene_variant	hnrnpdl	ENSCHAG00000002440
12	15705911	T	A	8.24	5.39503	91.4	58.8493	upstream_gene_variant	hnrnpdl	ENSCHAG00000002440
12	15706146	G	A	7.12	4.66173	87.99	56.6537	upstream_gene_variant	hnrnpdl	ENSCHAG00000002440
12	15706449	G	T	5.86	3.83676	70.16	45.1736	upstream_gene_variant	hnrnpdl	ENSCHAG00000002440
12	15706465	G	A	6.44	4.21651	74.03	47.6654	upstream_gene_variant	hnrnpdl	ENSCHAG00000002440
12	15706646	A	G	7.7	5.04147	72.68	46.7962	upstream_gene_variant	enoph1	ENSCHAG00000002350
12	15707652	A	C	8.48	5.55217	76.21	49.069	upstream_gene_variant	enoph1	ENSCHAG00000002350
12	15707693	C	T	8.69	5.68966	75.08	48.3414	upstream_gene_variant	enoph1	ENSCHAG00000002350
12	15707805	T	C	7.45	4.87779	71.1	45.7788	upstream_gene_variant	enoph1	ENSCHAG00000002350
12	15707944	G	T	7.61	4.98255	67.75	43.6219	upstream_gene_variant	enoph1	ENSCHAG00000002350
12	15708054	C	G	8.34	5.46051	72.93	46.9571	upstream_gene_variant	enoph1	ENSCHAG00000002350
12	15708272	T	A	7.28	4.76648	82.17	52.9064	upstream_gene_variant	enoph1	ENSCHAG00000002350
12	15708309	C	T	7.55	4.94326	81.97	52.7777	upstream_gene_variant	enoph1	ENSCHAG00000002350
12	15708518	A	G	7.35	4.81232	71.33	45.9269	upstream_gene_variant	enoph1	ENSCHAG00000002350
12	15708670	G	C	6.96	4.55697	70.68	45.5084	upstream_gene_variant	enoph1	ENSCHAG00000002350
12	15708857	T	C	7.17	4.69446	72.33	46.5708	upstream_gene_variant	enoph1	ENSCHAG00000002350
12	15708887	C	G	6.9	4.51768	72.55	46.7125	upstream_gene_variant	enoph1	ENSCHAG00000002350
12	15709633	C	T	8.03	5.25754	74.14	47.7362	upstream_gene_variant	enoph1	ENSCHAG00000002350
12	15709656	A	G	7.76	5.08076	70.18	45.1865	upstream_gene_variant	enoph1	ENSCHAG00000002350
12	15709711	C	T	7.8	5.10695	69.53	44.768	upstream_gene_variant	enoph1	ENSCHAG00000002350
12	15709763	G	A	7.96	5.21171	74.3	47.8392	upstream_gene_variant	enoph1	ENSCHAG00000002350
12	15710397	G	A	6.48	4.2427	67.7	43.5897	upstream_gene_variant	enoph1	ENSCHAG00000002350
12	15710559	G	A	8.15	5.33611	78.07	50.2666	upstream_gene_variant	enoph1	ENSCHAG00000002350
12	15710643	T	C	6.77	4.43257	80.68	51.9471	synonymous_variant	hnrnpdl	ENSCHAG00000002440
12	15710815	C	T	7.74	5.06766	80.54	51.8569	upstream_gene_variant	enoph1	ENSCHAG00000002350
12	15710905	C	G	6.99	4.57661	66.31	42.6947	upstream_gene_variant	enoph1	ENSCHAG00000002350
12	15710972	T	C	7.81	5.1135	67.99	43.7764	upstream_gene_variant	enoph1	ENSCHAG00000002350
12	15711005	A	G	8.07	5.28373	75.15	48.3865	upstream_gene_variant	enoph1	ENSCHAG00000002350
12	15711006	T	G	7.84	5.13314	73.88	47.5688	upstream_gene_variant	enoph1	ENSCHAG00000002350
12	15711505	A	G	6.55	4.28853	64.73	41.6774	upstream_gene_variant	enoph1	ENSCHAG00000002350
12	15711753	G	A	6.45	4.22305	75.99	48.9274	intron_variant	hnrnpdl	ENSCHAG00000002440
12	15711879	T	C	6.16	4.03318	60.45	38.9217	intron_variant	hnrnpdl	ENSCHAG00000002440
12	15712027	A	T	6.73	4.40638	66.47	42.7978	intron_variant	hnrnpdl	ENSCHAG00000002440
12	15712029	T	C	7.12	4.66173	67.63	43.5446	intron_variant	hnrnpdl	ENSCHAG00000002440
12	15712100	C	A	6.2	4.05937	54.13	34.8524	intron_variant	hnrnpdl	ENSCHAG00000002440
12	15712251	G	T	6.23	4.07901	74.09	47.704	intron_variant	hnrnpdl	ENSCHAG00000002440
12	15712350	G	A	7.03	4.6028	69.55	44.7809	intron_variant	hnrnpdl	ENSCHAG00000002440
12	15715119	G	T	7.14	4.67482	71.27	45.8883	downstream_gene_variant	hnrnpdl	ENSCHAG00000002440
12	15715429	C	T	6.43	4.20996	62.95	40.5313	downstream_gene_variant	hnrnpdl	ENSCHAG00000002440
12	15715431	G	T	6.66	4.36055	65.86	42.405	downstream_gene_variant	hnrnpdl	ENSCHAG00000002440
12	15715911	G	A	9.22	6.03667	58.13	37.4279	downstream_gene_variant	hnrnpdl	ENSCHAG00000002440
12	15723645	G	T	5.17	3.38499	51.38	33.0818	upstream_gene_variant	unannotated gene	ENSCHAG00000002685
12	15723856	A	C	7.86	5.14623	74.43	47.9229	upstream_gene_variant	unannotated gene	ENSCHAG00000002685
12	15724026	G	A	7.8	5.10695	76.28	49.1141	upstream_gene_variant	unannotated gene	ENSCHAG00000002685
12	15724160	G	T	6.2	4.05937	69.24	44.5813	upstream_gene_variant	unannotated gene	ENSCHAG00000002685
12	15724326	A	C	6.15	4.02663	56.31	36.2561	upstream_gene_variant	unannotated gene	ENSCHAG00000002685
12	15724327	A	C	6.82	4.46531	60.54	38.9796	upstream_gene_variant	unannotated gene	ENSCHAG00000002685
12	15724347	A	G	6.01	3.93497	58.19	37.4665	upstream_gene_variant	unannotated gene	ENSCHAG00000002685
12	15726334	A	C	5.92	3.87604	62.37	40.1579	upstream_gene_variant	unannotated gene	ENSCHAG00000002685
12	15727165	C	T	7.12	4.66173	69.77	44.9225	upstream_gene_variant	unannotated gene	ENSCHAG00000002685
12	15727974	A	C	7.87	5.15278	66.21	42.6303	intergenic_region	unannotated gene-unannotated gene	ENSCHAG00000002685-ENSCHAG00000002871
12	15728032	T	C	6.41	4.19686	62.92	40.512	intergenic_region	unannotated gene-unannotated gene	ENSCHAG00000002685-ENSCHAG00000002871
12	15728131	C	A	8.36	5.4736	78.47	50.5241	intergenic_region	unannotated gene-unannotated gene	ENSCHAG00000002685-ENSCHAG00000002871
12	15728179	C	T	9.01	5.89918	78.44	50.5048	intergenic_region	unannotated gene-unannotated gene	ENSCHAG00000002685-ENSCHAG00000002871
12	15728571	C	T	8.47	5.54562	73.12	47.0795	intergenic_region	unannotated gene-unannotated gene	ENSCHAG00000002685-ENSCHAG00000002871
12	15728608	G	C	8.98	5.87954	78.07	50.2666	intergenic_region	unannotated gene-unannotated gene	ENSCHAG00000002685-ENSCHAG00000002871
12	15729771	A	G	8.1	5.30337	68.83	44.3173	intergenic_region	unannotated gene-unannotated gene	ENSCHAG00000002685-ENSCHAG00000002871
12	15730650	G	T	9.15	5.99084	70.78	45.5728	intergenic_region	unannotated gene-unannotated gene	ENSCHAG00000002685-ENSCHAG00000002871
12	15730696	G	C	8.31	5.44086	73.96	47.6203	intergenic_region	unannotated gene-unannotated gene	ENSCHAG00000002685-ENSCHAG00000002871
12	15731339	T	G	7.66	5.01528	63.53	40.9048	intergenic_region	unannotated gene-unannotated gene	ENSCHAG00000002685-ENSCHAG00000002871
12	15731558	A	G	9.53	6.23964	73.6	47.3885	intergenic_region	unannotated gene-unannotated gene	ENSCHAG00000002685-ENSCHAG00000002871
12	15731611	A	G	12.17	7.96815	74.6	48.0324	intergenic_region	unannotated gene-unannotated gene	ENSCHAG00000002685-ENSCHAG00000002871
12	15731988	C	T	7.4	4.84505	68.58	44.1563	intergenic_region	unannotated gene-unannotated gene	ENSCHAG00000002685-ENSCHAG00000002871
12	15732007	T	G	6.36	4.16413	69.11	44.4976	intergenic_region	unannotated gene-unannotated gene	ENSCHAG00000002685-ENSCHAG00000002871
12	15732679	T	C	6.87	4.49804	69.61	44.8195	upstream_gene_variant	unannotated gene	ENSCHAG00000002871
12	15732954	G	C	3.5	2.29158	54.7	35.2195	upstream_gene_variant	unannotated gene	ENSCHAG00000002871
12	15733208	T	A	7.1	4.64863	73.79	47.5108	upstream_gene_variant	unannotated gene	ENSCHAG00000002871
12	15733588	A	C	8.44	5.52598	76.47	49.2364	upstream_gene_variant	unannotated gene	ENSCHAG00000002871
12	15733828	A	C	8.67	5.67657	63.48	40.8726	upstream_gene_variant	unannotated gene	ENSCHAG00000002871
12	15733906	T	G	8.65	5.66347	58.3	37.5374	upstream_gene_variant	unannotated gene	ENSCHAG00000002871
12	15734662	C	G	8.23	5.38848	76.68	49.3716	upstream_gene_variant	unannotated gene	ENSCHAG00000002871
12	15742154	T	C	7.68	5.02838	71.81	46.236	intron_variant	unannotated gene	ENSCHAG00000002871
12	15743864	G	A	6.76	4.42602	62.43	40.1965	synonymous_variant	unannotated gene	ENSCHAG00000002871
12	15744505	T	C	8.42	5.51288	70.97	45.6951	intron_variant	unannotated gene	ENSCHAG00000002871
12	15744600	C	G	7.56	4.94981	72.98	46.9893	synonymous_variant	unannotated gene	ENSCHAG00000002871
12	15744900	G	A	6.18	4.04627	62.09	39.9776	synonymous_variant	unannotated gene	ENSCHAG00000002871
12	15745106	C	T	9.3	6.08905	75.3	48.4831	splice_region_variant&intron_variant	unannotated gene	ENSCHAG00000002871
12	15746008	C	T	7	4.58316	77.27	49.7515	intron_variant	unannotated gene	ENSCHAG00000002871
12	15746437	G	A	7.66	5.01528	73.67	47.4336	synonymous_variant	unannotated gene	ENSCHAG00000002871
12	15747496	C	T	11.87	7.77173	72.8	46.8734	downstream_gene_variant	unannotated gene	ENSCHAG00000002871
12	15747607	G	T	8.81	5.76823	63.9	41.143	downstream_gene_variant	unannotated gene	ENSCHAG00000002871
12	15747904	T	C	6.93	4.53733	70.8	45.5857	downstream_gene_variant	unannotated gene	ENSCHAG00000002871
12	15749830	G	T	6.96	4.55697	76.77	49.4296	downstream_gene_variant	unannotated gene	ENSCHAG00000002871
12	15749879	T	C	7.71	5.04802	70.73	45.5406	downstream_gene_variant	unannotated gene	ENSCHAG00000002871
12	15749930	A	C	10.55	6.90747	71.6	46.1008	downstream_gene_variant	unannotated gene	ENSCHAG00000002871
12	15750189	T	C	9.71	6.3575	78.6	50.6078	downstream_gene_variant	unannotated gene	ENSCHAG00000002871
12	15750381	C	A	10.18	6.66522	79.78	51.3676	downstream_gene_variant	unannotated gene	ENSCHAG00000002871
12	15753499	C	T	NA	#VALUE!	61.67	39.7072	intergenic_region	unannotated gene-unannotated gene	ENSCHAG00000002871-ENSCHAG00000004007
12	15753860	T	C	8.81	5.76823	66.57	42.8621	intergenic_region	unannotated gene-unannotated gene	ENSCHAG00000002871-ENSCHAG00000004007
12	15754212	G	A	8.99	5.88608	78.3	50.4147	intergenic_region	unannotated gene-unannotated gene	ENSCHAG00000002871-ENSCHAG00000004007
12	15755385	T	C	8.4	5.49979	73.48	47.3112	upstream_gene_variant	unannotated gene	ENSCHAG00000004007
12	15755819	G	A	7.7	5.04147	68.8	44.298	upstream_gene_variant	unannotated gene	ENSCHAG00000004007
12	15755874	A	G	5.96	3.90223	68.84	44.3237	upstream_gene_variant	unannotated gene	ENSCHAG00000004007
12	15755914	A	G	6.3	4.12484	76.06	48.9724	upstream_gene_variant	unannotated gene	ENSCHAG00000004007
12	15763753	A	C	8.52	5.57836	61.02	39.2887	upstream_gene_variant	MYH	ENSCHAG00000004106
12	15763815	T	C	7.56	4.94981	72.3	46.5515	upstream_gene_variant	MYH	ENSCHAG00000004106
12	15764799	C	A	7.22	4.7272	71.28	45.8947	upstream_gene_variant	MYH	ENSCHAG00000004106
12	15766897	A	G	9.82	6.42952	55.32	35.6186	synonymous_variant	MYH	ENSCHAG00000004106
12	15766951	G	A	8.24	5.39503	66.53	42.8364	synonymous_variant	MYH	ENSCHAG00000004106
12	15767192	T	C	10.28	6.7307	63.97	41.1881	synonymous_variant	MYH	ENSCHAG00000004106
12	15767207	A	C	4.87	3.18857	65.67	42.2827	synonymous_variant	MYH	ENSCHAG00000004106
12	15767565	G	T	8.01	5.24444	61.36	39.5076	splice_region_variant&intron_variant	MYH	ENSCHAG00000004106
12	15771627	C	G	9.8	6.41642	80.95	52.1209	synonymous_variant	MYH	ENSCHAG00000004106
12	15771697	T	C	7.01	4.58971	72.68	46.7962	intron_variant	MYH	ENSCHAG00000004106
12	15772061	C	A	8.04	5.26408	62.93	40.5185	intron_variant	MYH	ENSCHAG00000004106
12	15772112	A	G	7.51	4.91707	68.17	43.8923	intron_variant	MYH	ENSCHAG00000004106
12	15772843	G	T	9.14	5.9843	62.55	40.2738	downstream_gene_variant	MYH	ENSCHAG00000004106
12	15772857	G	C	8.46	5.53907	59.31	38.1877	downstream_gene_variant	MYH	ENSCHAG00000004106
12	15772960	A	T	10.17	6.65867	66.71	42.9523	downstream_gene_variant	MYH	ENSCHAG00000004106
12	15773067	G	A	10.18	6.66522	75.4	48.5475	downstream_gene_variant	MYH	ENSCHAG00000004106
12	15775023	C	T	6.32	4.13794	50.75	32.6762	downstream_gene_variant	MYH	ENSCHAG00000004106
12	15775326	T	C	9.66	6.32476	69	44.4267	downstream_gene_variant	MYH	ENSCHAG00000004106
12	15775428	C	T	7.14	4.67482	62.52	40.2545	downstream_gene_variant	MYH	ENSCHAG00000004106
12	15775649	G	T	7.23	4.73375	67.23	43.2871	downstream_gene_variant	MYH	ENSCHAG00000004106
12	15775659	T	A	7.18	4.70101	63.37	40.8018	downstream_gene_variant	MYH	ENSCHAG00000004106
12	15775661	T	G	7.34	4.80577	61.38	39.5205	downstream_gene_variant	MYH	ENSCHAG00000004106
12	15775925	C	T	8.35	5.46705	69.18	44.5426	downstream_gene_variant	MYH	ENSCHAG00000004106
12	15777966	T	C	9.85	6.44916	82.35	53.0223	intergenic_region	MYH-mmyhl	ENSCHAG00000004106-ENSCHAG00000004255
12	15778468	C	T	9.26	6.06286	79.31	51.065	intergenic_region	MYH-mmyhl	ENSCHAG00000004106-ENSCHAG00000004255
12	15778490	C	A	9.31	6.0956	73.18	47.1181	intergenic_region	MYH-mmyhl	ENSCHAG00000004106-ENSCHAG00000004255
12	15778845	G	T	11.83	7.74554	85.92	55.3209	intergenic_region	MYH-mmyhl	ENSCHAG00000004106-ENSCHAG00000004255
12	15778906	T	A	12.06	7.89613	88.65	57.0787	intergenic_region	MYH-mmyhl	ENSCHAG00000004106-ENSCHAG00000004255
12	15778971	A	T	10.98	7.18901	81.6	52.5394	intergenic_region	MYH-mmyhl	ENSCHAG00000004106-ENSCHAG00000004255
12	15779526	A	G	9.84	6.44261	80.25	51.6702	intergenic_region	MYH-mmyhl	ENSCHAG00000004106-ENSCHAG00000004255
12	15779660	A	G	9.72	6.36404	76.04	48.9595	intergenic_region	MYH-mmyhl	ENSCHAG00000004106-ENSCHAG00000004255
12	15779773	T	G	9.77	6.39678	78.72	50.6851	intergenic_region	MYH-mmyhl	ENSCHAG00000004106-ENSCHAG00000004255
12	15779896	A	G	9.96	6.52118	93.63	60.2851	intergenic_region	MYH-mmyhl	ENSCHAG00000004106-ENSCHAG00000004255
12	15780327	A	G	8.72	5.70931	76.73	49.4038	intergenic_region	MYH-mmyhl	ENSCHAG00000004106-ENSCHAG00000004255
12	15780682	T	A	10.91	7.14318	82.31	52.9966	intergenic_region	MYH-mmyhl	ENSCHAG00000004106-ENSCHAG00000004255
12	15780866	T	A	10.77	7.05152	78.12	50.2988	intergenic_region	MYH-mmyhl	ENSCHAG00000004106-ENSCHAG00000004255
12	15780914	A	C	10.39	6.80272	73.79	47.5108	intergenic_region	MYH-mmyhl	ENSCHAG00000004106-ENSCHAG00000004255
12	15781415	T	C	8.14	5.32956	74.23	47.7941	intergenic_region	MYH-mmyhl	ENSCHAG00000004106-ENSCHAG00000004255
12	15782409	T	G	10.2	6.67832	82.25	52.958	upstream_gene_variant	mmyhl	ENSCHAG00000004255
12	15783066	T	C	7.3	4.77958	70.42	45.341	upstream_gene_variant	mmyhl	ENSCHAG00000004255
12	15783329	G	A	7.91	5.17897	79.01	50.8718	upstream_gene_variant	mmyhl	ENSCHAG00000004255
12	15783637	G	A	8.23	5.38848	78.82	50.7495	upstream_gene_variant	mmyhl	ENSCHAG00000004255
12	15784008	A	G	9.24	6.04977	68.59	44.1627	upstream_gene_variant	mmyhl	ENSCHAG00000004255
12	15785427	T	A	10.86	7.11044	84.92	54.6771	upstream_gene_variant	mmyhl	ENSCHAG00000004255
12	15785680	C	T	9.48	6.20691	82.14	52.8871	upstream_gene_variant	mmyhl	ENSCHAG00000004255
12	15785704	G	A	10	6.54737	77.3	49.7708	upstream_gene_variant	mmyhl	ENSCHAG00000004255
12	15785762	A	C	11.31	7.40507	77.09	49.6356	upstream_gene_variant	mmyhl	ENSCHAG00000004255
12	15785803	T	G	11.3	7.39853	80.83	52.0437	upstream_gene_variant	mmyhl	ENSCHAG00000004255
12	15785829	A	G	9.93	6.50154	77.01	49.5841	upstream_gene_variant	mmyhl	ENSCHAG00000004255
12	15785831	A	C	9.89	6.47535	77.75	50.0606	upstream_gene_variant	mmyhl	ENSCHAG00000004255
12	15785947	T	A	11.11	7.27413	84.35	54.3101	upstream_gene_variant	mmyhl	ENSCHAG00000004255
12	15786030	C	T	10.05	6.58011	73.51	47.3306	upstream_gene_variant	mmyhl	ENSCHAG00000004255
12	15786142	T	C	9.78	6.40333	82.8	53.3121	upstream_gene_variant	mmyhl	ENSCHAG00000004255
12	15786232	A	C	7.49	4.90398	75.18	48.4058	upstream_gene_variant	mmyhl	ENSCHAG00000004255
12	15787266	C	T	8.31	5.44086	80.45	51.799	intron_variant	mmyhl	ENSCHAG00000004255
12	15787467	T	A	10.65	6.97295	81.98	52.7841	intron_variant	mmyhl	ENSCHAG00000004255
12	15787605	G	A	9.94	6.50809	71.6	46.1008	intron_variant	mmyhl	ENSCHAG00000004255
12	15788686	A	C	10.8	7.07116	68.62	44.1821	intron_variant	mmyhl	ENSCHAG00000004255
12	15788694	G	T	10.44	6.83545	67.44	43.4223	intron_variant	mmyhl	ENSCHAG00000004255
12	15788696	T	C	10.14	6.63903	67.77	43.6348	intron_variant	mmyhl	ENSCHAG00000004255
12	15789031	T	C	8.83	5.78133	65.56	42.2118	intron_variant	mmyhl	ENSCHAG00000004255
12	15789137	T	A	9.7	6.35095	73.63	47.4078	synonymous_variant	mmyhl	ENSCHAG00000004255
12	15789513	T	C	9.08	5.94501	79.4	51.1229	intron_variant	mmyhl	ENSCHAG00000004255
12	15791484	T	C	10.22	6.69141	78.34	50.4404	intron_variant	mmyhl	ENSCHAG00000004255
12	15791606	C	T	10.6	6.94021	71.49	46.03	synonymous_variant	mmyhl	ENSCHAG00000004255
12	15791829	A	T	8.86	5.80097	72.91	46.9442	intron_variant	mmyhl	ENSCHAG00000004255
12	15792751	A	G	7.29	4.77303	73.67	47.4336	intron_variant	mmyhl	ENSCHAG00000004255
12	15793070	C	T	10.4	6.80926	73.48	47.3112	intron_variant	mmyhl	ENSCHAG00000004255
12	15793511	C	G	10.41	6.81581	80.32	51.7153	missense_variant	mmyhl	ENSCHAG00000004255
12	15793708	T	A	10	6.54737	76.1	48.9982	synonymous_variant	mmyhl	ENSCHAG00000004255
12	15793714	T	C	10.25	6.71105	77.11	49.6485	synonymous_variant	mmyhl	ENSCHAG00000004255
12	15794165	C	A	8.2	5.36884	67.92	43.7314	missense_variant	mmyhl	ENSCHAG00000004255
12	15794363	C	A	6.95	4.55042	61.98	39.9068	intron_variant	mmyhl	ENSCHAG00000004255
12	15794449	C	T	9.03	5.91227	86.64	55.7845	missense_variant	mmyhl	ENSCHAG00000004255
12	15795436	G	A	11.05	7.23484	69.32	44.6328	intron_variant	mmyhl	ENSCHAG00000004255
12	15796909	G	A	8.82	5.77478	82.28	52.9773	downstream_gene_variant	mmyhl	ENSCHAG00000004255
12	15797338	A	G	10.28	6.7307	69.83	44.9611	downstream_gene_variant	mmyhl	ENSCHAG00000004255
12	15797378	T	C	10.31	6.75034	67.16	43.242	downstream_gene_variant	mmyhl	ENSCHAG00000004255
12	15797477	T	A	9.94	6.50809	71.68	46.1523	downstream_gene_variant	mmyhl	ENSCHAG00000004255
12	15797645	G	C	8.07	5.28373	79.37	51.1036	downstream_gene_variant	mmyhl	ENSCHAG00000004255
12	15797813	T	C	9.32	6.10215	69.67	44.8581	downstream_gene_variant	mmyhl	ENSCHAG00000004255
12	15797826	A	C	8.57	5.6111	72.76	46.8477	downstream_gene_variant	mmyhl	ENSCHAG00000004255
12	15800348	A	G	8.59	5.62419	77.13	49.6614	downstream_gene_variant	mmyhl	ENSCHAG00000004255
12	15801525	T	G	9.49	6.21345	58.33	37.5567	downstream_gene_variant	mmyhl	ENSCHAG00000004255
12	15801931	A	T	10.94	7.16282	73.56	47.3628	intergenic_region	mmyhl-unannotated gene	ENSCHAG00000004255-ENSCHAG00000004307
12	15802964	T	C	9.42	6.16762	75.3	48.4831	intergenic_region	mmyhl-unannotated gene	ENSCHAG00000004255-ENSCHAG00000004307
12	15803286	A	C	9.23	6.04322	69.23	44.5748	intergenic_region	mmyhl-unannotated gene	ENSCHAG00000004255-ENSCHAG00000004307
12	15803443	G	T	8.26	5.40813	77.01	49.5841	intergenic_region	mmyhl-unannotated gene	ENSCHAG00000004255-ENSCHAG00000004307
12	15803521	C	T	10.41	6.81581	73.5	47.3241	intergenic_region	mmyhl-unannotated gene	ENSCHAG00000004255-ENSCHAG00000004307
12	15803546	C	T	10.66	6.9795	71.14	45.8046	intergenic_region	mmyhl-unannotated gene	ENSCHAG00000004255-ENSCHAG00000004307
12	15804409	C	T	9.01	5.89918	89.08	57.3556	intergenic_region	mmyhl-unannotated gene	ENSCHAG00000004255-ENSCHAG00000004307
12	15804479	A	C	10.33	6.76343	80.72	51.9728	intergenic_region	mmyhl-unannotated gene	ENSCHAG00000004255-ENSCHAG00000004307
12	15804514	T	C	11.28	7.38543	80.92	52.1016	intergenic_region	mmyhl-unannotated gene	ENSCHAG00000004255-ENSCHAG00000004307
12	15804796	C	T	7.52	4.92362	79.53	51.2066	intergenic_region	mmyhl-unannotated gene	ENSCHAG00000004255-ENSCHAG00000004307
12	15804946	C	G	8.66	5.67002	62.91	40.5056	intergenic_region	mmyhl-unannotated gene	ENSCHAG00000004255-ENSCHAG00000004307
12	15805346	T	A	10.96	7.17592	86.3	55.5656	intergenic_region	mmyhl-unannotated gene	ENSCHAG00000004255-ENSCHAG00000004307
12	15813276	A	C	11.33	7.41817	85.9	55.3081	intergenic_region	mmyhl-unannotated gene	ENSCHAG00000004255-ENSCHAG00000004307
12	15814674	T	G	11.68	7.64733	67.33	43.3515	intergenic_region	mmyhl-unannotated gene	ENSCHAG00000004255-ENSCHAG00000004307
12	15815178	T	A	8.94	5.85335	95.45	61.457	intergenic_region	mmyhl-unannotated gene	ENSCHAG00000004255-ENSCHAG00000004307
12	15815388	T	C	12.16	7.9616	97.48	62.764	intergenic_region	mmyhl-unannotated gene	ENSCHAG00000004255-ENSCHAG00000004307
12	15815871	T	A	10.98	7.18901	86.48	55.6815	intergenic_region	mmyhl-unannotated gene	ENSCHAG00000004255-ENSCHAG00000004307
12	15815970	G	A	8.26	5.40813	81.23	52.3012	intergenic_region	mmyhl-unannotated gene	ENSCHAG00000004255-ENSCHAG00000004307
12	15815981	G	A	10.07	6.5932	85.27	54.9024	intergenic_region	mmyhl-unannotated gene	ENSCHAG00000004255-ENSCHAG00000004307
12	15816042	C	T	12.55	8.21695	76.34	49.1527	intergenic_region	mmyhl-unannotated gene	ENSCHAG00000004255-ENSCHAG00000004307
12	15816427	A	G	9.1	5.95811	81.41	52.4171	intergenic_region	mmyhl-unannotated gene	ENSCHAG00000004255-ENSCHAG00000004307
12	15816599	A	C	11.61	7.6015	86.52	55.7073	intergenic_region	mmyhl-unannotated gene	ENSCHAG00000004255-ENSCHAG00000004307
12	15817062	G	T	11.55	7.56221	95.91	61.7532	intergenic_region	mmyhl-unannotated gene	ENSCHAG00000004255-ENSCHAG00000004307
12	15817112	T	C	10.53	6.89438	99.35	63.9681	intergenic_region	mmyhl-unannotated gene	ENSCHAG00000004255-ENSCHAG00000004307
12	15817144	A	C	11.04	7.2283	95.91	61.7532	intergenic_region	mmyhl-unannotated gene	ENSCHAG00000004255-ENSCHAG00000004307
12	15817318	T	G	11.26	7.37234	99.27	63.9165	intergenic_region	mmyhl-unannotated gene	ENSCHAG00000004255-ENSCHAG00000004307
12	15817351	T	A	31.7	20.7552	82.47	53.0996	intergenic_region	mmyhl-unannotated gene	ENSCHAG00000004255-ENSCHAG00000004307
12	15817442	G	T	9.71	6.3575	97.49	62.7705	intergenic_region	mmyhl-unannotated gene	ENSCHAG00000004255-ENSCHAG00000004307
12	15817641	T	A	9.24	6.04977	99.79	64.2514	intergenic_region	mmyhl-unannotated gene	ENSCHAG00000004255-ENSCHAG00000004307
12	15831849	C	T	9.25	6.05632	76.01	48.9402	intergenic_region	mmyhl-unannotated gene	ENSCHAG00000004255-ENSCHAG00000004307
12	15831869	A	G	9.06	5.93192	83.6	53.8272	intergenic_region	mmyhl-unannotated gene	ENSCHAG00000004255-ENSCHAG00000004307
12	15833040	G	C	6.52	4.26888	50.54	32.541	intergenic_region	mmyhl-unannotated gene	ENSCHAG00000004255-ENSCHAG00000004307
12	15848076	G	A	9.96	6.52118	74.83	48.1805	intergenic_region	unannotated gene-MYH	ENSCHAG00000004307-ENSCHAG00000004352
12	15850265	T	G	10.24	6.70451	80.5	51.8312	intergenic_region	unannotated gene-MYH	ENSCHAG00000004307-ENSCHAG00000004352
12	15850275	A	T	10.41	6.81581	76.04	48.9595	intergenic_region	unannotated gene-MYH	ENSCHAG00000004307-ENSCHAG00000004352
12	15850277	T	C	11.38	7.45091	76.75	49.4167	intergenic_region	unannotated gene-MYH	ENSCHAG00000004307-ENSCHAG00000004352
12	15850465	C	A	9.95	6.51463	64.64	41.6195	intergenic_region	unannotated gene-MYH	ENSCHAG00000004307-ENSCHAG00000004352
12	15850705	C	T	9.35	6.12179	74.28	47.8263	intergenic_region	unannotated gene-MYH	ENSCHAG00000004307-ENSCHAG00000004352
12	15851126	C	T	7.76	5.08076	63.95	41.1752	intergenic_region	unannotated gene-MYH	ENSCHAG00000004307-ENSCHAG00000004352
12	15851650	C	A	8.52	5.57836	70.73	45.5406	intergenic_region	unannotated gene-MYH	ENSCHAG00000004307-ENSCHAG00000004352
12	15852151	T	C	9.27	6.06941	79.74	51.3418	intergenic_region	unannotated gene-MYH	ENSCHAG00000004307-ENSCHAG00000004352
12	15854999	G	T	5.06	3.31297	58.25	37.5052	intergenic_region	unannotated gene-MYH	ENSCHAG00000004307-ENSCHAG00000004352
12	15855352	T	A	11.5	7.52947	61.02	39.2887	intergenic_region	unannotated gene-MYH	ENSCHAG00000004307-ENSCHAG00000004352
12	15856165	A	G	9.71	6.3575	79.39	51.1165	intergenic_region	unannotated gene-MYH	ENSCHAG00000004307-ENSCHAG00000004352
12	15856167	T	A	10.03	6.56701	76.98	49.5648	intergenic_region	unannotated gene-MYH	ENSCHAG00000004307-ENSCHAG00000004352
12	15856168	C	A	10.36	6.78307	77.88	50.1443	intergenic_region	unannotated gene-MYH	ENSCHAG00000004307-ENSCHAG00000004352
12	15857046	G	A	3.84	2.51419	58.84	37.8851	intergenic_region	unannotated gene-MYH	ENSCHAG00000004307-ENSCHAG00000004352
12	15857201	G	A	1.88	1.23091	63.75	41.0464	intergenic_region	unannotated gene-MYH	ENSCHAG00000004307-ENSCHAG00000004352
12	15857545	G	A	9.87	6.46225	73.92	47.5946	intergenic_region	unannotated gene-MYH	ENSCHAG00000004307-ENSCHAG00000004352
12	15857973	C	T	7.25	4.74684	79.61	51.2581	intergenic_region	unannotated gene-MYH	ENSCHAG00000004307-ENSCHAG00000004352
12	15857974	A	G	9.22	6.03667	80.66	51.9342	intergenic_region	unannotated gene-MYH	ENSCHAG00000004307-ENSCHAG00000004352
12	15858418	T	C	8.66	5.67002	83.58	53.8143	intergenic_region	unannotated gene-MYH	ENSCHAG00000004307-ENSCHAG00000004352
12	15858428	A	G	9.01	5.89918	81.25	52.3141	intergenic_region	unannotated gene-MYH	ENSCHAG00000004307-ENSCHAG00000004352
12	15858522	A	C	7.1	4.64863	80.43	51.7861	intergenic_region	unannotated gene-MYH	ENSCHAG00000004307-ENSCHAG00000004352
12	15858790	G	T	6.98	4.57006	67.5	43.4609	intergenic_region	unannotated gene-MYH	ENSCHAG00000004307-ENSCHAG00000004352
12	15859109	T	A	11.77	7.70625	61.23	39.4239	intergenic_region	unannotated gene-MYH	ENSCHAG00000004307-ENSCHAG00000004352
12	15859363	C	T	12.61	8.25623	87.32	56.2223	intergenic_region	unannotated gene-MYH	ENSCHAG00000004307-ENSCHAG00000004352
12	15859421	C	G	11.32	7.41162	83.05	53.473	intergenic_region	unannotated gene-MYH	ENSCHAG00000004307-ENSCHAG00000004352
12	15859613	T	C	11.06	7.24139	84.54	54.4324	intergenic_region	unannotated gene-MYH	ENSCHAG00000004307-ENSCHAG00000004352
12	15877702	A	G	11.69	7.65387	60.63	39.0376	downstream_gene_variant	MYH	ENSCHAG00000004352
12	15877809	G	A	11.18	7.31996	71.71	46.1716	downstream_gene_variant	MYH	ENSCHAG00000004352
12	15878536	A	C	11.51	7.53602	83.79	53.9495	downstream_gene_variant	MYH	ENSCHAG00000004352
12	15878540	T	G	11.34	7.42472	82.31	52.9966	downstream_gene_variant	MYH	ENSCHAG00000004352
12	15878898	C	T	9.72	6.36404	77.29	49.7644	downstream_gene_variant	MYH	ENSCHAG00000004352
12	15879105	A	G	11.81	7.73244	83.24	53.5954	downstream_gene_variant	MYH	ENSCHAG00000004352
12	15879161	A	G	12.79	8.37409	92.65	59.6542	downstream_gene_variant	MYH	ENSCHAG00000004352
12	15879162	G	C	12.74	8.34135	92.85	59.7829	downstream_gene_variant	MYH	ENSCHAG00000004352
12	15879675	A	C	11.97	7.8372	90.23	58.096	downstream_gene_variant	MYH	ENSCHAG00000004352
12	15879801	C	G	11.93	7.81101	93.59	60.2594	downstream_gene_variant	MYH	ENSCHAG00000004352
12	15880237	A	G	12.3	8.05326	94.21	60.6586	downstream_gene_variant	MYH	ENSCHAG00000004352
12	15880420	A	G	10.97	7.18246	90.81	58.4694	downstream_gene_variant	MYH	ENSCHAG00000004352
12	15880705	G	A	29.65	19.4129	54.25	34.9297	downstream_gene_variant	MYH	ENSCHAG00000004352
12	15880708	T	G	8.86	5.80097	81.77	52.6489	downstream_gene_variant	MYH	ENSCHAG00000004352
12	15881195	C	G	11.14	7.29377	80.68	51.9471	downstream_gene_variant	MYH	ENSCHAG00000004352
12	15881246	T	A	45.86	30.0262	64.5	41.5293	downstream_gene_variant	MYH	ENSCHAG00000004352
12	15881318	A	C	11.28	7.38543	89.76	57.7934	downstream_gene_variant	MYH	ENSCHAG00000004352
12	15882380	A	G	11.57	7.57531	84.37	54.3229	intergenic_region	MYH-MYH	ENSCHAG00000004352-ENSCHAG00000004703
12	15882512	T	C	13.37	8.75383	71.36	45.9463	intergenic_region	MYH-MYH	ENSCHAG00000004352-ENSCHAG00000004703
12	15882644	A	G	8.32	5.44741	75.22	48.4316	intergenic_region	MYH-MYH	ENSCHAG00000004352-ENSCHAG00000004703
12	15883368	A	G	8.55	5.598	92.8	59.7507	intergenic_region	MYH-MYH	ENSCHAG00000004352-ENSCHAG00000004703
12	15883632	T	G	12.75	8.3479	88.18	56.7761	intergenic_region	MYH-MYH	ENSCHAG00000004352-ENSCHAG00000004703
12	15884208	A	G	32.13	21.0367	50.55	32.5474	intergenic_region	MYH-MYH	ENSCHAG00000004352-ENSCHAG00000004703
12	15884739	C	A	12.04	7.88303	97.97	63.0795	intergenic_region	MYH-MYH	ENSCHAG00000004352-ENSCHAG00000004703
12	15885197	A	C	13.56	8.87823	92.51	59.564	intergenic_region	MYH-MYH	ENSCHAG00000004352-ENSCHAG00000004703
12	15885471	C	G	12.9	8.44611	86.22	55.5141	intergenic_region	MYH-MYH	ENSCHAG00000004352-ENSCHAG00000004703
12	15886164	G	A	13.05	8.54432	82.74	53.2734	intergenic_region	MYH-MYH	ENSCHAG00000004352-ENSCHAG00000004703
12	15886369	G	A	10.35	6.77653	65.7	42.302	intergenic_region	MYH-MYH	ENSCHAG00000004352-ENSCHAG00000004703
12	15886683	G	A	8.78	5.74859	84.72	54.5483	intergenic_region	MYH-MYH	ENSCHAG00000004352-ENSCHAG00000004703
12	15887100	A	G	11.99	7.8503	93.2	60.0083	intergenic_region	MYH-MYH	ENSCHAG00000004352-ENSCHAG00000004703
12	15887334	G	A	42.57	27.8722	53.43	34.4017	intergenic_region	MYH-MYH	ENSCHAG00000004352-ENSCHAG00000004703
12	15888253	A	C	11.44	7.49019	99.46	64.0389	intergenic_region	MYH-MYH	ENSCHAG00000004352-ENSCHAG00000004703
12	15888828	T	G	10.15	6.64558	98.36	63.3306	intergenic_region	MYH-MYH	ENSCHAG00000004352-ENSCHAG00000004703
12	15890626	G	T	33.03	21.626	60.7	39.0826	intergenic_region	MYH-MYH	ENSCHAG00000004352-ENSCHAG00000004703
12	15890639	G	T	14.04	9.19251	87.03	56.0356	intergenic_region	MYH-MYH	ENSCHAG00000004352-ENSCHAG00000004703
12	15890658	G	A	14.38	9.41512	89.49	57.6195	intergenic_region	MYH-MYH	ENSCHAG00000004352-ENSCHAG00000004703
12	15890747	G	A	31.78	20.8075	53.41	34.3889	intergenic_region	MYH-MYH	ENSCHAG00000004352-ENSCHAG00000004703
12	15891720	G	A	36.76	24.0681	55.83	35.947	intergenic_region	MYH-MYH	ENSCHAG00000004352-ENSCHAG00000004703
12	15892095	C	G	10.73	7.02533	69.31	44.6263	intergenic_region	MYH-MYH	ENSCHAG00000004352-ENSCHAG00000004703
12	15892251	G	A	27.44	17.966	53.68	34.5627	intergenic_region	MYH-MYH	ENSCHAG00000004352-ENSCHAG00000004703
12	15892385	T	G	8.72	5.70931	88.43	56.937	intergenic_region	MYH-MYH	ENSCHAG00000004352-ENSCHAG00000004703
12	15892416	T	G	9.03	5.91227	79.27	51.0392	intergenic_region	MYH-MYH	ENSCHAG00000004352-ENSCHAG00000004703
12	15892436	C	T	7.94	5.19861	73.2	47.131	intergenic_region	MYH-MYH	ENSCHAG00000004352-ENSCHAG00000004703
12	15892446	A	T	7.63	4.99564	74.53	47.9873	intergenic_region	MYH-MYH	ENSCHAG00000004352-ENSCHAG00000004703
12	15894465	G	C	15.04	9.84724	93.87	60.4397	intergenic_region	MYH-MYH	ENSCHAG00000004352-ENSCHAG00000004703
12	15894570	T	A	36.04	23.5967	56.51	36.3848	intergenic_region	MYH-MYH	ENSCHAG00000004352-ENSCHAG00000004703
12	15896022	A	C	9.23	6.04322	68.21	43.9181	intergenic_region	MYH-MYH	ENSCHAG00000004352-ENSCHAG00000004703
12	15896397	C	G	32.66	21.3837	50.74	32.6697	intergenic_region	MYH-MYH	ENSCHAG00000004352-ENSCHAG00000004703
12	15896631	G	A	28.63	18.7451	59.89	38.5611	intergenic_region	MYH-MYH	ENSCHAG00000004352-ENSCHAG00000004703
12	15896792	A	C	10.03	6.56701	72.24	46.5129	intergenic_region	MYH-MYH	ENSCHAG00000004352-ENSCHAG00000004703
12	15897738	G	A	18	11.7853	76.49	49.2493	upstream_gene_variant	MYH	ENSCHAG00000004703
12	15897954	C	T	41.11	26.9162	60.13	38.7156	upstream_gene_variant	MYH	ENSCHAG00000004703
12	15897990	C	T	13.78	9.02227	84.55	54.4388	upstream_gene_variant	MYH	ENSCHAG00000004703
12	15898836	C	A	33.11	21.6783	57.09	36.7583	upstream_gene_variant	MYH	ENSCHAG00000004703
12	15898957	C	T	29.16	19.0921	56.46	36.3527	upstream_gene_variant	MYH	ENSCHAG00000004703
12	15917374	T	C	18.16	11.89	61.01	39.2822	downstream_gene_variant	MYH	ENSCHAG00000004703
12	15917617	A	C	23.78	15.5696	79.89	51.4384	downstream_gene_variant	MYH	ENSCHAG00000004703
12	15925954	T	C	8.87	5.80752	52.09	33.539	intergenic_region	MYH-Psedogene	ENSCHAG00000004703-ENSCHAG00000006092
12	15928717	A	G	14.63	9.5788	61.83	39.8102	intergenic_region	MYH-Psedogene	ENSCHAG00000004703-ENSCHAG00000006092
12	15932892	C	A	14.77	9.67046	63.99	41.201	intergenic_region	MYH-Psedogene	ENSCHAG00000004703-ENSCHAG00000006092
12	16004620	C	A	9.97	6.52773	84.45	54.3745	intergenic_region	MYH-unannotated gene	ENSCHAG00000006150-ENSCHAG00000007958
12	16004763	A	C	15.13	9.90617	77.23	49.7257	intergenic_region	MYH-unannotated gene	ENSCHAG00000006150-ENSCHAG00000007958
12	16004838	G	T	11.41	7.47055	79.66	51.2903	intergenic_region	MYH-unannotated gene	ENSCHAG00000006150-ENSCHAG00000007958
12	16005605	C	T	12.78	8.36754	90.52	58.2827	intergenic_region	MYH-unannotated gene	ENSCHAG00000006150-ENSCHAG00000007958
12	16005780	G	C	11.09	7.26103	89.7	57.7548	intergenic_region	MYH-unannotated gene	ENSCHAG00000006150-ENSCHAG00000007958
12	16006187	A	C	11.88	7.77827	93.59	60.2594	intergenic_region	MYH-unannotated gene	ENSCHAG00000006150-ENSCHAG00000007958
12	16009797	T	G	9.81	6.42297	88.03	56.6795	intergenic_region	MYH-unannotated gene	ENSCHAG00000006150-ENSCHAG00000007958
12	16011158	G	A	9.42	6.16762	60.57	38.9989	intergenic_region	MYH-unannotated gene	ENSCHAG00000006150-ENSCHAG00000007958
12	16011350	T	G	7.77	5.08731	72.5	46.6803	intergenic_region	MYH-unannotated gene	ENSCHAG00000006150-ENSCHAG00000007958
12	16011894	C	T	14.79	9.68356	86.43	55.6493	intergenic_region	MYH-unannotated gene	ENSCHAG00000006150-ENSCHAG00000007958
12	16011963	C	G	14.44	9.4544	94.65	60.9419	intergenic_region	MYH-unannotated gene	ENSCHAG00000006150-ENSCHAG00000007958
12	16012039	T	C	10.35	6.77653	95.37	61.4055	intergenic_region	MYH-unannotated gene	ENSCHAG00000006150-ENSCHAG00000007958
12	16012108	C	G	9.83	6.43606	95.67	61.5986	downstream_gene_variant	unannotated gene	ENSCHAG00000007958
12	16012785	A	G	12.56	8.2235	94.4	60.7809	downstream_gene_variant	unannotated gene	ENSCHAG00000007958
12	16012978	T	C	5.29	3.46356	63.43	40.8404	downstream_gene_variant	unannotated gene	ENSCHAG00000007958
12	16013110	A	C	8.7	5.69621	81.42	52.4235	downstream_gene_variant	unannotated gene	ENSCHAG00000007958
12	16013404	C	T	11.8	7.7259	92.35	59.461	downstream_gene_variant	unannotated gene	ENSCHAG00000007958
12	16015310	T	A	7.63	4.99564	73.93	47.601	downstream_gene_variant	unannotated gene	ENSCHAG00000007958
12	16017272	C	T	8.43	5.51943	88.19	56.7825	intron_variant	unannotated gene	ENSCHAG00000007958
12	16017346	T	A	6.55	4.28853	78.82	50.7495	intron_variant	unannotated gene	ENSCHAG00000007958
12	16017374	T	C	9.05	5.92537	77.46	49.8738	intron_variant	unannotated gene	ENSCHAG00000007958
12	16017998	C	T	12.53	8.20385	92.55	59.5898	missense_variant	unannotated gene	ENSCHAG00000007958
12	16019980	G	C	11.36	7.43781	86.75	55.8553	upstream_gene_variant	unannotated gene	ENSCHAG00000007958
12	16022083	C	G	NA	#VALUE!	50.96	32.8114	upstream_gene_variant	unannotated gene	ENSCHAG00000007958
12	16022235	A	G	9.78	6.40333	83.9	54.0203	upstream_gene_variant	unannotated gene	ENSCHAG00000007958
12	16023287	A	T	12.7	8.31516	78.22	50.3632	upstream_gene_variant	unannotated gene	ENSCHAG00000007958
12	16023645	C	A	17.32	11.34	65.94	42.4565	upstream_gene_variant	unannotated gene	ENSCHAG00000007958
12	16023718	T	C	13.1	8.57705	59.71	38.4452	intergenic_region	unannotated gene-unannotated gene	ENSCHAG00000007958-ENSCHAG00000007979
12	16025731	C	T	8.23	5.38848	80.22	51.6509	intergenic_region	unannotated gene-unannotated gene	ENSCHAG00000007958-ENSCHAG00000007979
12	16026080	G	A	4.14	2.71061	73.57	47.3692	intergenic_region	unannotated gene-unannotated gene	ENSCHAG00000007958-ENSCHAG00000007979
12	16026539	G	T	8.38	5.4867	75.97	48.9145	intergenic_region	unannotated gene-unannotated gene	ENSCHAG00000007958-ENSCHAG00000007979
12	16030478	T	A	10.82	7.08425	90.44	58.2312	intergenic_region	unannotated gene-unannotated gene	ENSCHAG00000007958-ENSCHAG00000007979
12	16030517	C	T	10.96	7.17592	85.64	55.1407	intergenic_region	unannotated gene-unannotated gene	ENSCHAG00000007958-ENSCHAG00000007979
12	16030752	C	T	11.77	7.70625	90.72	58.4115	intergenic_region	unannotated gene-unannotated gene	ENSCHAG00000007958-ENSCHAG00000007979
12	16030876	G	A	12.75	8.3479	73.14	47.0923	intergenic_region	unannotated gene-unannotated gene	ENSCHAG00000007958-ENSCHAG00000007979
12	16030978	A	C	8.41	5.50634	64.67	41.6388	intergenic_region	unannotated gene-unannotated gene	ENSCHAG00000007958-ENSCHAG00000007979
12	16031418	G	A	11.71	7.66697	72.07	46.4034	upstream_gene_variant	unannotated gene	ENSCHAG00000007979
12	16032496	G	A	9.66	6.32476	85.73	55.1986	upstream_gene_variant	unannotated gene	ENSCHAG00000007979
12	16033289	G	A	14.3	9.36274	90.25	58.1089	upstream_gene_variant	unannotated gene	ENSCHAG00000007979
12	16034651	T	A	11.22	7.34615	91.59	58.9717	upstream_gene_variant	unannotated gene	ENSCHAG00000007979
12	16034767	C	A	6.82	4.46531	92.39	59.4867	upstream_gene_variant	unannotated gene	ENSCHAG00000007979
12	16038388	G	A	8.21	5.37539	87.6	56.4026	downstream_gene_variant	unannotated gene	ENSCHAG00000007979
12	16038775	A	C	13.33	8.72764	81.92	52.7455	downstream_gene_variant	unannotated gene	ENSCHAG00000007979
12	16038898	C	G	13.72	8.98299	88.77	57.156	downstream_gene_variant	unannotated gene	ENSCHAG00000007979
12	16038899	A	T	13.72	8.98299	88.59	57.0401	downstream_gene_variant	unannotated gene	ENSCHAG00000007979
12	16038906	A	C	13.28	8.69491	87.5	56.3382	downstream_gene_variant	unannotated gene	ENSCHAG00000007979
12	16044429	A	G	9.03	5.91227	65.99	42.4887	upstream_gene_variant	MYH	ENSCHAG00000008006
12	16047860	G	A	10.84	7.09735	65.75	42.3342	downstream_gene_variant	MYH	ENSCHAG00000008006
15	7748604	T	G	43.97	28.7888	53.63	34.5305	intergenic_region	sox11b-allc	ENSCHAG00000015495-ENSCHAG00000015507
15	7749094	C	T	41.34	27.0668	55.91	35.9985	intergenic_region	sox11b-allc	ENSCHAG00000015495-ENSCHAG00000015507
15	7750607	C	T	39.52	25.8752	58.9	37.9237	intergenic_region	sox11b-allc	ENSCHAG00000015495-ENSCHAG00000015507
15	7757217	G	A	34.83	22.8045	59.43	38.2649	intergenic_region	sox11b-allc	ENSCHAG00000015495-ENSCHAG00000015507
15	7759366	C	T	31.44	20.5849	36.66	23.6041	intergenic_region	sox11b-allc	ENSCHAG00000015495-ENSCHAG00000015507
15	7760134	A	G	88.88	58.193	101.64	65.4425	intergenic_region	sox11b-allc	ENSCHAG00000015495-ENSCHAG00000015507
15	7763042	T	A	26.57	17.3964	79.07	50.9105	intergenic_region	sox11b-allc	ENSCHAG00000015495-ENSCHAG00000015507
15	7763122	A	T	62.59	40.98	83.93	54.0396	intergenic_region	sox11b-allc	ENSCHAG00000015495-ENSCHAG00000015507
15	7768974	C	T	14.22	9.31036	53.87	34.685	intergenic_region	sox11b-allc	ENSCHAG00000015495-ENSCHAG00000015507
15	7769289	G	T	14.56	9.53297	63.34	40.7825	intergenic_region	sox11b-allc	ENSCHAG00000015495-ENSCHAG00000015507
15	7769692	C	T	34.82	22.7979	50.9	32.7728	intergenic_region	sox11b-allc	ENSCHAG00000015495-ENSCHAG00000015507
15	7771681	T	C	17.58	11.5103	67.79	43.6477	intergenic_region	sox11b-allc	ENSCHAG00000015495-ENSCHAG00000015507
15	7775072	C	G	8.55	5.598	50.3	32.3864	intergenic_region	sox11b-allc	ENSCHAG00000015495-ENSCHAG00000015507
15	7778853	T	G	9.01	5.89918	52.3	33.6742	intergenic_region	sox11b-allc	ENSCHAG00000015495-ENSCHAG00000015507
15	7793610	C	T	16.15	10.574	66.76	42.9845	intergenic_region	sox11b-allc	ENSCHAG00000015495-ENSCHAG00000015507
15	7799248	G	C	10.23	6.69796	52.07	33.5261	intergenic_region	sox11b-allc	ENSCHAG00000015495-ENSCHAG00000015507
15	7801739	G	A	5.24	3.43082	53.42	34.3953	intergenic_region	sox11b-allc	ENSCHAG00000015495-ENSCHAG00000015507
15	7808226	C	G	11.64	7.62114	52.36	33.7128	intergenic_region	sox11b-allc	ENSCHAG00000015495-ENSCHAG00000015507
15	7808675	A	G	33.76	22.1039	51.83	33.3716	intergenic_region	sox11b-allc	ENSCHAG00000015495-ENSCHAG00000015507
15	7814996	G	A	15.59	10.2073	53.95	34.7366	intergenic_region	sox11b-allc	ENSCHAG00000015495-ENSCHAG00000015507
15	7833200	T	C	15.4	10.0829	53.72	34.5885	intergenic_region	sox11b-allc	ENSCHAG00000015495-ENSCHAG00000015507
15	7845205	G	T	16.87	11.0454	51.22	32.9788	intergenic_region	sox11b-allc	ENSCHAG00000015495-ENSCHAG00000015507
15	7859520	G	T	15.2	9.952	52.47	33.7836	downstream_gene_variant	allc	ENSCHAG00000015507
15	7860572	C	T	16.61	10.8752	52.78	33.9832	downstream_gene_variant	allc	ENSCHAG00000015507
15	8813384	C	T	53.56	35.0677	57.09	36.7583	intron_variant	nrxn3b	ENSCHAG00000020775
15	8813413	A	T	54.34	35.5784	50.05	32.2255	intron_variant	nrxn3b	ENSCHAG00000020775
15	8813424	T	G	37.09	24.2842	40.78	26.2568	intron_variant	nrxn3b	ENSCHAG00000020775
15	8813745	A	T	40.95	26.8115	34.23	22.0395	intron_variant	nrxn3b	ENSCHAG00000020775
15	8814258	T	G	36.18	23.6884	37.32	24.0291	intron_variant	nrxn3b	ENSCHAG00000020775
15	8814467	T	G	54.2	35.4867	49.97	32.174	intron_variant	nrxn3b	ENSCHAG00000020775
15	8815302	G	A	41.93	27.4531	37.21	23.9582	intron_variant	nrxn3b	ENSCHAG00000020775
15	8816338	G	A	61	39.939	43.35	27.9116	intron_variant	nrxn3b	ENSCHAG00000020775
15	8816580	A	C	45.7	29.9215	42.76	27.5317	intron_variant	nrxn3b	ENSCHAG00000020775
15	8820476	C	G	43.37	28.3959	35.06	22.5739	intron_variant	nrxn3b	ENSCHAG00000020775
15	8823303	C	A	43.71	28.6186	32.47	20.9063	intron_variant	nrxn3b	ENSCHAG00000020775
15	8823469	G	A	45.8	29.987	34.06	21.9301	intron_variant	nrxn3b	ENSCHAG00000020775
15	8823592	T	A	44.85	29.365	39.26	25.2782	intron_variant	nrxn3b	ENSCHAG00000020775
15	8824113	G	A	48.66	31.8595	80.31	51.7089	intron_variant	nrxn3b	ENSCHAG00000020775
15	8825541	T	C	40.05	26.2222	60.46	38.9281	intron_variant	nrxn3b	ENSCHAG00000020775
15	8825978	C	T	54.53	35.7028	52.1	33.5454	intron_variant	nrxn3b	ENSCHAG00000020775
15	8829200	G	T	31.02	20.3099	44.56	28.6907	intron_variant	nrxn3b	ENSCHAG00000020775
15	8829678	T	G	47.61	31.172	38.67	24.8983	intron_variant	nrxn3b	ENSCHAG00000020775
15	8830109	C	G	51.55	33.7517	41.15	26.4951	intron_variant	nrxn3b	ENSCHAG00000020775
15	8831013	G	A	39.56	25.9014	34.33	22.1039	synonymous_variant	nrxn3b	ENSCHAG00000020775
15	8831688	A	G	49.51	32.416	30.44	19.5993	downstream_gene_variant	nrxn3b	ENSCHAG00000020775
15	8831724	A	T	41.89	27.4269	31.74	20.4363	downstream_gene_variant	nrxn3b	ENSCHAG00000020775
15	8831732	T	G	40.44	26.4776	32.71	21.0608	downstream_gene_variant	nrxn3b	ENSCHAG00000020775
15	8831799	A	G	41.84	27.3942	36.59	23.559	downstream_gene_variant	nrxn3b	ENSCHAG00000020775
15	8832326	T	G	42.14	27.5906	30.62	19.7152	downstream_gene_variant	nrxn3b	ENSCHAG00000020775
15	8833512	A	T	37.4	24.4872	32.77	21.0995	downstream_gene_variant	nrxn3b	ENSCHAG00000020775
15	8834623	A	G	59.84	39.1795	44.61	28.7228	downstream_gene_variant	nrxn3b	ENSCHAG00000020775
15	8834854	T	C	56.61	37.0647	50.8	32.7084	downstream_gene_variant	nrxn3b	ENSCHAG00000020775
15	8835606	T	G	34.53	22.6081	45.36	29.2057	downstream_gene_variant	nrxn3b	ENSCHAG00000020775
15	8835610	C	G	35.06	22.9551	44.97	28.9546	downstream_gene_variant	nrxn3b	ENSCHAG00000020775
15	8837095	G	T	56.03	36.6849	64.36	41.4392	3_prime_UTR_variant	CEP128	ENSCHAG00000002370
15	8837587	G	A	59.25	38.7932	72.13	46.442	3_prime_UTR_variant	CEP128	ENSCHAG00000002370
15	8837758	A	G	60.58	39.664	71.13	45.7982	3_prime_UTR_variant	CEP128	ENSCHAG00000002370
15	8837949	T	C	50.88	33.313	60.04	38.6577	3_prime_UTR_variant	CEP128	ENSCHAG00000002370
15	8838010	A	G	51.27	33.5684	57.83	37.2348	3_prime_UTR_variant	CEP128	ENSCHAG00000002370
15	8839373	G	A	65.34	42.7805	75.18	48.4058	missense_variant	CEP128	ENSCHAG00000002370
15	8839410	T	C	47.58	31.1524	78.87	50.7817	missense_variant	CEP128	ENSCHAG00000002370
15	8839485	T	C	63.21	41.3859	65.03	41.8706	intron_variant	CEP128	ENSCHAG00000002370
15	8839591	A	C	73.28	47.9791	72.39	46.6094	intron_variant	CEP128	ENSCHAG00000002370
15	8839606	T	C	54.02	35.3689	84.24	54.2392	intron_variant	CEP128	ENSCHAG00000002370
15	8839691	A	G	69.19	45.3012	80.82	52.0372	intron_variant	CEP128	ENSCHAG00000002370
15	8840180	C	A	40.07	26.2353	60.22	38.7736	intron_variant	CEP128	ENSCHAG00000002370
15	8840528	A	G	59.57	39.0027	55.45	35.7024	intron_variant	CEP128	ENSCHAG00000002370
15	8840725	C	A	47.12	30.8512	50	32.1933	intron_variant	CEP128	ENSCHAG00000002370
15	8841419	G	A	33.8	22.1301	36.17	23.2886	intron_variant	CEP128	ENSCHAG00000002370
15	8841813	T	G	45.14	29.5548	57.21	36.8356	intron_variant	CEP128	ENSCHAG00000002370
15	8842618	G	T	50.68	33.1821	68.14	43.873	intron_variant	CEP128	ENSCHAG00000002370
15	8844895	C	G	33.19	21.7307	38.84	25.0077	intron_variant	CEP128	ENSCHAG00000002370
15	8844905	C	T	37.19	24.3497	48.51	31.2339	intron_variant	CEP128	ENSCHAG00000002370
15	8848729	C	G	38.8	25.4038	46.1	29.6822	intron_variant	CEP128	ENSCHAG00000002370
15	8850074	A	G	59.21	38.767	81.24	52.3076	intron_variant	CEP128	ENSCHAG00000002370
15	8850325	C	G	55.91	36.6063	70.59	45.4505	intron_variant	CEP128	ENSCHAG00000002370
15	8851262	G	T	37.4	24.4872	63.15	40.6601	missense_variant	CEP128	ENSCHAG00000002370
15	8851403	G	C	28.01	18.3392	60.51	38.9603	synonymous_variant	CEP128	ENSCHAG00000002370
15	8854606	T	G	40.47	26.4972	84.97	54.7093	intron_variant	CEP128	ENSCHAG00000002370
15	8861998	A	T	59.78	39.1402	95.31	61.3668	intron_variant	CEP128	ENSCHAG00000002370
15	8863037	A	C	35.5	23.2432	44.51	28.6585	intron_variant	CEP128	ENSCHAG00000002370
15	8863486	G	C	62.39	40.849	105.11	67.6767	intron_variant	CEP128	ENSCHAG00000002370
15	8864451	G	T	75.33	49.3213	106.26	68.4172	upstream_gene_variant	CEP128	ENSCHAG00000002370
15	8865093	G	A	76.88	50.3362	93.71	60.3367	upstream_gene_variant	CEP128	ENSCHAG00000002370
15	8865779	T	C	39.79	26.052	61.71	39.733	upstream_gene_variant	CEP128	ENSCHAG00000002370
15	8866062	T	A	69.56	45.5435	77.16	49.6807	upstream_gene_variant	CEP128	ENSCHAG00000002370
15	8866067	C	T	70.64	46.2506	76.87	49.494	upstream_gene_variant	CEP128	ENSCHAG00000002370
15	8866100	T	G	68.93	45.131	73.49	47.3177	upstream_gene_variant	CEP128	ENSCHAG00000002370
15	8866111	A	C	61.24	40.0961	67.22	43.2807	upstream_gene_variant	CEP128	ENSCHAG00000002370
15	8873811	T	G	75.67	49.5439	101.76	65.5198	intron_variant	tshr	ENSCHAG00000002528
15	8874041	G	T	75.31	49.3082	98.1	63.1632	intron_variant	tshr	ENSCHAG00000002528
15	8874531	A	G	82.93	54.2973	106.58	68.6232	intron_variant	tshr	ENSCHAG00000002528
15	8875215	A	C	72.06	47.1803	94.42	60.7938	intron_variant	tshr	ENSCHAG00000002528
15	8875232	T	C	73.61	48.1952	97.48	62.764	intron_variant	tshr	ENSCHAG00000002528
15	8875233	T	C	73.4	48.0577	99.1	63.8071	intron_variant	tshr	ENSCHAG00000002528
15	8877128	C	G	50.37	32.9791	54.78	35.271	intron_variant	tshr	ENSCHAG00000002528
15	8877173	A	C	47.59	31.1589	53.69	34.5691	intron_variant	tshr	ENSCHAG00000002528
15	8877601	T	C	64.77	42.4073	83.23	53.5889	intron_variant	tshr	ENSCHAG00000002528
15	8878368	A	G	60.81	39.8146	65.55	42.2054	intron_variant	tshr	ENSCHAG00000002528
15	8896574	T	C	43.25	28.3174	64.94	41.8126	upstream_gene_variant	tshr	ENSCHAG00000002528
15	8896838	A	G	72.5	47.4684	97.24	62.6095	upstream_gene_variant	tshr	ENSCHAG00000002528
15	8900089	T	C	67.03	43.887	92.53	59.5769	synonymous_variant	tshr	ENSCHAG00000002528
15	8900455	T	C	66.77	43.7168	99.69	64.187	upstream_gene_variant	tshr	ENSCHAG00000002528
15	8904592	A	C	39.99	26.1829	53.42	34.3953	intron_variant	tshr	ENSCHAG00000002528
15	8904984	T	A	55.87	36.5802	79.96	51.4835	intron_variant	tshr	ENSCHAG00000002528
15	8905934	C	A	60.99	39.9324	65.43	42.1281	intron_variant	tshr	ENSCHAG00000002528
15	8905938	T	A	60.43	39.5658	64.93	41.8062	intron_variant	tshr	ENSCHAG00000002528
15	8905940	T	G	27.61	18.0773	54	34.7687	intron_variant	tshr	ENSCHAG00000002528
15	8906558	A	C	44.39	29.0638	45.19	29.0963	missense_variant	tshr	ENSCHAG00000002528
15	8906859	C	A	67.89	44.4501	81.48	52.4622	missense_variant	tshr	ENSCHAG00000002528
15	8908651	T	A	45.81	29.9935	53.67	34.5563	downstream_gene_variant	tshr	ENSCHAG00000002528
15	8908918	A	G	60.51	39.6181	78.66	50.6465	downstream_gene_variant	tshr	ENSCHAG00000002528
15	8909551	A	G	32.27	21.1284	43.48	27.9953	downstream_gene_variant	tshr	ENSCHAG00000002528
15	8909975	A	C	36.21	23.708	43.98	28.3172	downstream_gene_variant	tshr	ENSCHAG00000002528
15	8910026	A	G	48.82	31.9643	72.12	46.4356	downstream_gene_variant	tshr	ENSCHAG00000002528
15	8910481	C	T	61.31	40.1419	76.86	49.4875	downstream_gene_variant	tshr	ENSCHAG00000002528
15	8910523	G	A	45.55	29.8233	40.72	26.2182	downstream_gene_variant	tshr	ENSCHAG00000002528
15	8910711	T	C	55.69	36.4623	42.99	27.6798	downstream_gene_variant	tshr	ENSCHAG00000002528
15	8910737	A	T	68.64	44.9411	75.14	48.3801	downstream_gene_variant	tshr	ENSCHAG00000002528
15	8917729	T	G	54.67	35.7945	80.05	51.5414	downstream_gene_variant	gtf2a1	ENSCHAG00000003305
15	8920349	A	C	48.91	32.0232	53.23	34.273	intron_variant	gtf2a1	ENSCHAG00000003305
15	8920645	G	A	38.51	25.2139	52.71	33.9382	synonymous_variant	gtf2a1	ENSCHAG00000003305
15	8921274	A	T	42.14	27.5906	59.08	38.0396	intron_variant	gtf2a1	ENSCHAG00000003305
15	8921466	A	G	42.93	28.1079	65.19	41.9736	intron_variant	gtf2a1	ENSCHAG00000003305
15	8921825	T	A	43.92	28.756	55.88	35.9792	intron_variant	gtf2a1	ENSCHAG00000003305
15	8921861	T	C	44.37	29.0507	56.98	36.6875	intron_variant	gtf2a1	ENSCHAG00000003305
15	8922045	G	A	31.33	20.5129	32.57	20.9707	missense_variant	gtf2a1	ENSCHAG00000003305
15	8922616	T	G	33.85	22.1628	40.42	26.0251	intron_variant	gtf2a1	ENSCHAG00000003305
15	8923116	A	G	44.41	29.0769	47.51	30.5901	intron_variant	gtf2a1	ENSCHAG00000003305
15	8924823	A	C	43.81	28.684	51.69	33.2814	intron_variant	gtf2a1	ENSCHAG00000003305
15	8925090	G	A	47.8	31.2964	52.41	33.745	intron_variant	gtf2a1	ENSCHAG00000003305
15	8925092	A	G	47.85	31.3292	53.69	34.5691	intron_variant	gtf2a1	ENSCHAG00000003305
15	8928897	A	C	47.68	31.2179	36.43	23.456	upstream_gene_variant	gtf2a1	ENSCHAG00000003305
15	8929177	A	G	54.6	35.7486	46.58	29.9913	upstream_gene_variant	gtf2a1	ENSCHAG00000003305
15	8939684	C	T	35.35	23.145	41.47	26.7011	intron_variant	ches1	ENSCHAG00000003334
15	8941407	T	A	46.11	30.1899	38.86	25.0206	intron_variant	ches1	ENSCHAG00000003334
15	8943290	T	C	34.3	22.4575	41.49	26.714	intron_variant	ches1	ENSCHAG00000003334
15	8984770	G	A	32.24	21.1087	31.16	20.0629	intergenic_region	ches1-kcnk13b	ENSCHAG00000003334-ENSCHAG00000003360
15	8993301	C	T	39.96	26.1633	37.03	23.8423	upstream_gene_variant	kcnk13b	ENSCHAG00000003360
15	8994297	A	T	30.47	19.9498	33.92	21.8399	upstream_gene_variant	kcnk13b	ENSCHAG00000003360
15	8994529	C	A	40.93	26.7984	39.57	25.4778	upstream_gene_variant	kcnk13b	ENSCHAG00000003360
15	8995379	G	T	38.26	25.0502	43.06	27.7249	intron_variant	kcnk13b	ENSCHAG00000003360
15	9010217	A	C	36.76	24.0681	39.1	25.1751	downstream_gene_variant	PSMC1	ENSCHAG00000003397
15	9010331	A	T	39.04	25.5609	40.04	25.7804	downstream_gene_variant	PSMC1	ENSCHAG00000003397
15	9010449	T	C	31.84	20.8468	41.6	26.7848	downstream_gene_variant	PSMC1	ENSCHAG00000003397
15	9011042	T	G	38.4	25.1419	33.77	21.7433	downstream_gene_variant	PSMC1	ENSCHAG00000003397
15	9012092	G	A	41.56	27.2109	36.96	23.7973	downstream_gene_variant	PSMC1	ENSCHAG00000003397
15	9012286	T	G	41.5	27.1716	32.22	20.7454	downstream_gene_variant	PSMC1	ENSCHAG00000003397
15	9012288	A	G	39.52	25.8752	30.94	19.9212	downstream_gene_variant	PSMC1	ENSCHAG00000003397
15	9013567	C	G	32.76	21.4492	36.12	23.2564	intergenic_region	PSMC1-kcnk13b	ENSCHAG00000003397-ENSCHAG00000003623
15	9022867	T	C	40.59	26.5758	36.82	23.7071	synonymous_variant	kcnk13b	ENSCHAG00000003623
15	9040907	A	C	42.88	28.0751	42.48	27.3514	downstream_gene_variant	PSMC1	ENSCHAG00000003652
15	9041121	G	A	42.07	27.5448	37.26	23.9904	downstream_gene_variant	PSMC1	ENSCHAG00000003652
15	9042583	G	A	32.06	20.9909	35.76	23.0246	downstream_gene_variant	PSMC1	ENSCHAG00000003652
15	9044545	G	A	30.12	19.7207	36.81	23.7007	downstream_gene_variant	PSMC1	ENSCHAG00000003652
15	9044623	G	A	31.12	20.3754	39.06	25.1494	downstream_gene_variant	PSMC1	ENSCHAG00000003652
15	9045589	C	T	34.13	22.3462	45.78	29.4762	intergenic_region	PSMC1-calm1b	ENSCHAG00000003652-ENSCHAG00000003923
15	9049286	T	G	33.15	21.7045	39.83	25.6452	upstream_gene_variant	calm1b	ENSCHAG00000003923
15	9049866	T	C	30.71	20.107	30.83	19.8504	upstream_gene_variant	calm1b	ENSCHAG00000003923
15	9050272	T	A	35.62	23.3217	40.96	26.3727	upstream_gene_variant	calm1b	ENSCHAG00000003923
15	9050319	C	T	36.79	24.0878	37.33	24.0355	upstream_gene_variant	calm1b	ENSCHAG00000003923
15	9050430	T	G	37.2	24.3562	35.12	22.6126	upstream_gene_variant	calm1b	ENSCHAG00000003923
15	9050442	G	A	36.87	24.1402	36.81	23.7007	upstream_gene_variant	calm1b	ENSCHAG00000003923
15	9051375	C	T	35.81	23.4461	39.72	25.5743	upstream_gene_variant	calm1b	ENSCHAG00000003923
15	9051410	C	T	34.32	22.4706	35.05	22.5675	upstream_gene_variant	calm1b	ENSCHAG00000003923
15	9051538	C	T	33.57	21.9795	40.04	25.7804	upstream_gene_variant	calm1b	ENSCHAG00000003923
15	9053079	T	G	30.78	20.1528	40.19	25.877	intron_variant	calm1b	ENSCHAG00000003923
15	10878768	C	T	49.06	32.1214	33.47	21.5502	intergenic_region	jag2b-esr2a	ENSCHAG00000013621-ENSCHAG00000014970
15	10882128	T	A	14.4	9.42821	51.39	33.0883	intergenic_region	jag2b-esr2a	ENSCHAG00000013621-ENSCHAG00000014970
15	10904508	T	A	27.02	17.691	59.98	38.6191	intron_variant	esr2a	ENSCHAG00000014970
15	10904832	C	G	30.57	20.0153	62.82	40.4476	intron_variant	esr2a	ENSCHAG00000014970
15	10905051	C	G	36.12	23.6491	61.48	39.5849	intron_variant	esr2a	ENSCHAG00000014970
15	10905653	G	A	28.19	18.457	66.59	42.875	intron_variant	esr2a	ENSCHAG00000014970
15	10907433	A	T	30.73	20.1201	69.31	44.6263	intron_variant	esr2a	ENSCHAG00000014970
15	10907600	G	T	16.41	10.7442	51.24	32.9917	intron_variant	esr2a	ENSCHAG00000014970
15	10914730	A	G	52.75	34.5374	15.04	9.68374	downstream_gene_variant	esr2a	ENSCHAG00000014970
15	10955055	C	T	31.22	20.4409	31.99	20.5973	intergenic_region	SYNE2-lncRNA	ENSCHAG00000015009-ENSCHAG00000015180
15	10956917	A	G	50.44	33.0249	54.43	35.0456	downstream_gene_variant	lncRNA	ENSCHAG00000015180
15	10957450	G	A	48.43	31.7089	51.71	33.2943	downstream_gene_variant	lncRNA	ENSCHAG00000015180
15	10957489	A	C	50.29	32.9267	27.77	17.8801	downstream_gene_variant	lncRNA	ENSCHAG00000015180
15	10961869	A	G	65.62	42.9638	31.42	20.2303	downstream_gene_variant	lncRNA	ENSCHAG00000015181
15	10963604	T	A	50.18	32.8547	36.8	23.6943	upstream_gene_variant	lncRNA	ENSCHAG00000015180
15	10964315	G	A	62.83	41.1371	38.62	24.8661	upstream_gene_variant	lncRNA	ENSCHAG00000015180
15	10964665	G	C	71.76	46.9839	45.13	29.0577	upstream_gene_variant	lncRNA	ENSCHAG00000015180
15	10965325	G	C	71.9	47.0756	45.3	29.1671	upstream_gene_variant	lncRNA	ENSCHAG00000015180
15	10965368	T	C	68.07	44.5679	44.11	28.4009	upstream_gene_variant	lncRNA	ENSCHAG00000015180
15	10967513	C	T	40.99	26.8377	31.93	20.5586	upstream_gene_variant	lncRNA	ENSCHAG00000015180
15	10968934	C	T	47.71	31.2375	36.28	23.3594	upstream_gene_variant	lncRNA	ENSCHAG00000015181
15	10972104	A	C	65.41	42.8263	45.86	29.5277	upstream_gene_variant	lncRNA	ENSCHAG00000015184
15	10972236	C	T	43.64	28.5727	40.57	26.1216	upstream_gene_variant	lncRNA	ENSCHAG00000015184
15	10973326	A	G	31.58	20.6766	35.87	23.0955	upstream_gene_variant	lncRNA	ENSCHAG00000015184
15	10976639	T	C	62.1	40.6592	55.21	35.5478	downstream_gene_variant	lncRNA	ENSCHAG00000015190
15	10976739	A	G	50.71	33.2017	23.42	15.0793	upstream_gene_variant	lncRNA	ENSCHAG00000015187
15	10977005	T	C	61.15	40.0372	53.48	34.4339	upstream_gene_variant	lncRNA	ENSCHAG00000015187
15	10977352	T	C	61.63	40.3514	34.67	22.3228	upstream_gene_variant	lncRNA	ENSCHAG00000015187
15	10978449	G	A	58.75	38.4658	41.8	26.9136	upstream_gene_variant	lncRNA	ENSCHAG00000015187
15	10982890	A	C	66.92	43.815	30.5	19.6379	upstream_gene_variant	lncRNA	ENSCHAG00000015190
15	10984062	A	C	69.35	45.406	36.97	23.8037	upstream_gene_variant	lncRNA	ENSCHAG00000015190
15	10984890	T	C	56.42	36.9403	37.73	24.2931	intergenic_region	lncRNA-lncRNA	ENSCHAG00000015190-ENSCHAG00000015192
15	10985557	T	C	46.22	30.2619	38.2	24.5957	intergenic_region	lncRNA-lncRNA	ENSCHAG00000015190-ENSCHAG00000015192
15	10986076	G	A	63.36	41.4841	35.6	22.9216	intergenic_region	lncRNA-lncRNA	ENSCHAG00000015190-ENSCHAG00000015192
15	10986564	C	A	38.57	25.2532	43.14	27.7764	intergenic_region	lncRNA-lncRNA	ENSCHAG00000015190-ENSCHAG00000015192
15	10987343	T	C	50.88	33.313	36.08	23.2307	intergenic_region	lncRNA-lncRNA	ENSCHAG00000015190-ENSCHAG00000015192
15	10987902	C	T	9.98	6.53427	51.77	33.3329	intergenic_region	lncRNA-lncRNA	ENSCHAG00000015190-ENSCHAG00000015192
15	10988424	A	G	62.7	41.052	40.67	26.186	intergenic_region	lncRNA-lncRNA	ENSCHAG00000015190-ENSCHAG00000015192
15	10988808	C	G	38.19	25.0044	47.32	30.4677	intergenic_region	lncRNA-lncRNA	ENSCHAG00000015190-ENSCHAG00000015192
15	10991522	G	A	NA	#VALUE!	52.7	33.9317	intergenic_region	lncRNA-lncRNA	ENSCHAG00000015190-ENSCHAG00000015192
15	10994173	T	C	36.42	23.8455	40.34	25.9735	intergenic_region	lncRNA-lncRNA	ENSCHAG00000015190-ENSCHAG00000015192
15	10996929	G	T	37.72	24.6967	38.64	24.879	downstream_gene_variant	lncRNA	ENSCHAG00000015192
15	11000817	T	C	51.62	33.7975	23.55	15.163	downstream_gene_variant	lncRNA	ENSCHAG00000015192
15	11004694	G	A	49.76	32.5797	35.29	22.722	upstream_gene_variant	lncRNA	ENSCHAG00000015192
15	11005151	T	C	39.72	26.0062	30.22	19.4576	upstream_gene_variant	lncRNA	ENSCHAG00000015192
19	20429259	T	C	39.33	25.7508	31.9	20.5393	intergenic_region	adgrb1b-lncRNA	ENSCHAG00000008603-ENSCHAG00000010575
19	20446037	C	A	39.27	25.7115	31.06	19.9985	intergenic_region	adgrb1b-lncRNA	ENSCHAG00000008603-ENSCHAG00000010575
19	20454186	G	C	52.79	34.5636	25.08	16.1482	intergenic_region	adgrb1b-lncRNA	ENSCHAG00000008603-ENSCHAG00000010575
19	20454218	T	G	51.71	33.8564	29.18	18.788	intergenic_region	adgrb1b-lncRNA	ENSCHAG00000008603-ENSCHAG00000010575
19	20475757	A	G	50.91	33.3327	15.51	9.98636	intergenic_region	adgrb1b-lncRNA	ENSCHAG00000008603-ENSCHAG00000010575
19	20475945	A	G	59.75	39.1205	19.75	12.7163	intergenic_region	adgrb1b-lncRNA	ENSCHAG00000008603-ENSCHAG00000010575
19	20475978	A	G	58.76	38.4723	21.27	13.695	intergenic_region	adgrb1b-lncRNA	ENSCHAG00000008603-ENSCHAG00000010575
19	20476108	G	A	61.34	40.1616	18.46	11.8858	intergenic_region	adgrb1b-lncRNA	ENSCHAG00000008603-ENSCHAG00000010575
19	20476429	A	G	62.6	40.9865	19.29	12.4202	intergenic_region	adgrb1b-lncRNA	ENSCHAG00000008603-ENSCHAG00000010575
19	20476486	A	C	58.84	38.5247	23.13	14.8926	intergenic_region	adgrb1b-lncRNA	ENSCHAG00000008603-ENSCHAG00000010575
19	20476544	T	C	54.6	35.7486	19.32	12.4395	intergenic_region	adgrb1b-lncRNA	ENSCHAG00000008603-ENSCHAG00000010575
19	20476599	A	G	54.8	35.8796	19.83	12.7679	intergenic_region	adgrb1b-lncRNA	ENSCHAG00000008603-ENSCHAG00000010575
19	20476605	G	A	53.55	35.0612	18.76	12.0789	intergenic_region	adgrb1b-lncRNA	ENSCHAG00000008603-ENSCHAG00000010575
19	20477551	A	C	57.29	37.5099	27.22	17.526	intergenic_region	adgrb1b-lncRNA	ENSCHAG00000008603-ENSCHAG00000010575
19	20477748	C	T	51.66	33.8237	21.49	13.8367	intergenic_region	adgrb1b-lncRNA	ENSCHAG00000008603-ENSCHAG00000010575
19	20477888	A	G	56.59	37.0516	28.5	18.3502	intergenic_region	adgrb1b-lncRNA	ENSCHAG00000008603-ENSCHAG00000010575
19	20477940	T	C	53.97	35.3362	23.97	15.4335	intergenic_region	adgrb1b-lncRNA	ENSCHAG00000008603-ENSCHAG00000010575
19	20478009	C	T	57.86	37.8831	27.4	17.6419	intergenic_region	adgrb1b-lncRNA	ENSCHAG00000008603-ENSCHAG00000010575
19	20478113	A	G	51.43	33.6731	18.38	11.8343	intergenic_region	adgrb1b-lncRNA	ENSCHAG00000008603-ENSCHAG00000010575
19	20478157	A	C	52.71	34.5112	17.4	11.2033	intergenic_region	adgrb1b-lncRNA	ENSCHAG00000008603-ENSCHAG00000010575
19	20478241	C	T	53.91	35.2969	23.35	15.0343	intergenic_region	adgrb1b-lncRNA	ENSCHAG00000008603-ENSCHAG00000010575
19	20478453	C	A	54.82	35.8927	21.42	13.7916	intergenic_region	adgrb1b-lncRNA	ENSCHAG00000008603-ENSCHAG00000010575
19	20478556	A	T	62.24	40.7508	25.84	16.6375	intergenic_region	adgrb1b-lncRNA	ENSCHAG00000008603-ENSCHAG00000010575
19	20478563	C	A	58.54	38.3283	29.34	18.891	intergenic_region	adgrb1b-lncRNA	ENSCHAG00000008603-ENSCHAG00000010575
19	20478585	G	A	60.36	39.5199	32.29	20.7904	intergenic_region	adgrb1b-lncRNA	ENSCHAG00000008603-ENSCHAG00000010575
19	20478698	C	T	58.11	38.0468	24.48	15.7618	intergenic_region	adgrb1b-lncRNA	ENSCHAG00000008603-ENSCHAG00000010575
19	20478699	C	T	57.6	37.7128	23.33	15.0214	intergenic_region	adgrb1b-lncRNA	ENSCHAG00000008603-ENSCHAG00000010575
19	20478940	T	C	56.47	36.973	26.71	17.1977	intergenic_region	adgrb1b-lncRNA	ENSCHAG00000008603-ENSCHAG00000010575
19	20479038	G	A	61.22	40.083	21.23	13.6693	intergenic_region	adgrb1b-lncRNA	ENSCHAG00000008603-ENSCHAG00000010575
19	20479138	G	T	56.69	37.117	31.58	20.3333	intergenic_region	adgrb1b-lncRNA	ENSCHAG00000008603-ENSCHAG00000010575
19	20479219	G	A	52.08	34.0987	21.14	13.6113	intergenic_region	adgrb1b-lncRNA	ENSCHAG00000008603-ENSCHAG00000010575
19	20479220	A	T	52.93	34.6552	20.46	13.1735	intergenic_region	adgrb1b-lncRNA	ENSCHAG00000008603-ENSCHAG00000010575
19	20479381	A	C	54.28	35.5391	22.69	14.6093	intergenic_region	adgrb1b-lncRNA	ENSCHAG00000008603-ENSCHAG00000010575
19	20479408	A	T	55.46	36.3117	21.21	13.6564	intergenic_region	adgrb1b-lncRNA	ENSCHAG00000008603-ENSCHAG00000010575
19	20479444	G	A	50.01	32.7434	22.04	14.1908	intergenic_region	adgrb1b-lncRNA	ENSCHAG00000008603-ENSCHAG00000010575
19	20480527	T	G	56.03	36.6849	25.37	16.3349	upstream_gene_variant	lncRNA	ENSCHAG00000010575
19	20485565	T	A	53.61	35.1004	24.93	16.0516	intron_variant	lncRNA	ENSCHAG00000010575
19	20496633	G	C	54.71	35.8207	24.24	15.6073	intron_variant	lncRNA	ENSCHAG00000010575
19	20499505	G	A	53.42	34.976	21.64	13.9333	downstream_gene_variant	lncRNA	ENSCHAG00000010575
19	20504221	G	A	45.16	29.5679	43.71	28.1434	downstream_gene_variant	lncRNA	ENSCHAG00000010575
19	20506888	C	A	43.32	28.3632	35.99	23.1727	downstream_gene_variant	lncRNA	ENSCHAG00000010575
19	20508766	G	A	46.41	30.3863	40.9	26.3341	intergenic_region	lncRNA-cep55l	ENSCHAG00000010575-ENSCHAG00000010580
19	20534628	G	A	36.01	23.5771	34.11	21.9623	downstream_gene_variant	cep55l	ENSCHAG00000010580
19	20538499	T	C	44.22	28.9525	38.13	24.5506	intergenic_region	cep55l-lncRNA	ENSCHAG00000010580-ENSCHAG00000010612
19	20538651	T	C	32.2	21.0825	30.39	19.5671	intergenic_region	cep55l-lncRNA	ENSCHAG00000010580-ENSCHAG00000010612
19	20538652	G	A	31.83	20.8403	30.61	19.7087	intergenic_region	cep55l-lncRNA	ENSCHAG00000010580-ENSCHAG00000010612
19	20538691	G	A	41.76	27.3418	33.66	21.6725	intergenic_region	cep55l-lncRNA	ENSCHAG00000010580-ENSCHAG00000010612
19	20538706	C	T	39.45	25.8294	39.29	25.2975	intergenic_region	cep55l-lncRNA	ENSCHAG00000010580-ENSCHAG00000010612
19	20538723	A	T	39.6	25.9276	41.6	26.7848	intergenic_region	cep55l-lncRNA	ENSCHAG00000010580-ENSCHAG00000010612
19	20539388	A	T	60.67	39.7229	31.65	20.3783	intergenic_region	cep55l-lncRNA	ENSCHAG00000010580-ENSCHAG00000010612
19	20540118	C	T	60.22	39.4283	52.5	33.8029	intergenic_region	cep55l-lncRNA	ENSCHAG00000010580-ENSCHAG00000010612
19	20541014	C	T	63.26	41.4187	51.34	33.0561	intergenic_region	cep55l-lncRNA	ENSCHAG00000010580-ENSCHAG00000010612
19	20541226	A	G	64.41	42.1716	55.37	35.6508	intergenic_region	cep55l-lncRNA	ENSCHAG00000010580-ENSCHAG00000010612
19	20541479	C	A	59.13	38.7146	51.2	32.9659	intergenic_region	cep55l-lncRNA	ENSCHAG00000010580-ENSCHAG00000010612
19	20542149	G	T	56.02	36.6784	51.7	33.2879	intergenic_region	cep55l-lncRNA	ENSCHAG00000010580-ENSCHAG00000010612
19	20543796	A	G	55.19	36.1349	53.38	34.3695	intergenic_region	cep55l-lncRNA	ENSCHAG00000010580-ENSCHAG00000010612
19	20543808	G	A	63.17	41.3597	50.2	32.3221	intergenic_region	cep55l-lncRNA	ENSCHAG00000010580-ENSCHAG00000010612
19	20543886	T	C	59.49	38.9503	48.61	31.2983	intergenic_region	cep55l-lncRNA	ENSCHAG00000010580-ENSCHAG00000010612
19	20544167	G	C	58.72	38.4462	42.56	27.4029	intergenic_region	cep55l-lncRNA	ENSCHAG00000010580-ENSCHAG00000010612
19	20544666	T	C	64.81	42.4335	37.15	23.9196	intergenic_region	cep55l-lncRNA	ENSCHAG00000010580-ENSCHAG00000010612
19	20545196	G	A	55.98	36.6522	44.54	28.6778	intergenic_region	cep55l-lncRNA	ENSCHAG00000010580-ENSCHAG00000010612
19	20545232	C	T	55.52	36.351	52.66	33.906	intergenic_region	cep55l-lncRNA	ENSCHAG00000010580-ENSCHAG00000010612
19	20545279	C	T	54.59	35.7421	54.47	35.0714	intergenic_region	cep55l-lncRNA	ENSCHAG00000010580-ENSCHAG00000010612
19	20545552	G	T	59.2	38.7604	50.54	32.541	intergenic_region	cep55l-lncRNA	ENSCHAG00000010580-ENSCHAG00000010612
19	20545634	T	G	65.33	42.774	44.51	28.6585	intergenic_region	cep55l-lncRNA	ENSCHAG00000010580-ENSCHAG00000010612
19	20545906	G	T	66.56	43.5793	60.39	38.883	intergenic_region	cep55l-lncRNA	ENSCHAG00000010580-ENSCHAG00000010612
19	20545960	C	T	63.97	41.8835	60.48	38.941	intergenic_region	cep55l-lncRNA	ENSCHAG00000010580-ENSCHAG00000010612
19	20546003	C	A	61.35	40.1681	54	34.7687	intergenic_region	cep55l-lncRNA	ENSCHAG00000010580-ENSCHAG00000010612
19	20546071	G	A	70.71	46.2964	55.83	35.947	intergenic_region	cep55l-lncRNA	ENSCHAG00000010580-ENSCHAG00000010612
19	20546078	T	C	69.33	45.3929	60.35	38.8573	intergenic_region	cep55l-lncRNA	ENSCHAG00000010580-ENSCHAG00000010612
19	20546325	C	T	65.62	42.9638	56.46	36.3527	intergenic_region	cep55l-lncRNA	ENSCHAG00000010580-ENSCHAG00000010612
19	20546389	C	T	69.12	45.2554	51.5	33.1591	intergenic_region	cep55l-lncRNA	ENSCHAG00000010580-ENSCHAG00000010612
19	20546494	A	G	68.73	45.0001	48.57	31.2726	intergenic_region	cep55l-lncRNA	ENSCHAG00000010580-ENSCHAG00000010612
19	20546514	C	A	68.88	45.0983	46.33	29.8303	intergenic_region	cep55l-lncRNA	ENSCHAG00000010580-ENSCHAG00000010612
19	20546553	G	A	67.19	43.9918	42.52	27.3772	intergenic_region	cep55l-lncRNA	ENSCHAG00000010580-ENSCHAG00000010612
19	20546599	A	G	67.72	44.3388	42.7	27.4931	intergenic_region	cep55l-lncRNA	ENSCHAG00000010580-ENSCHAG00000010612
19	20546707	G	A	62.24	40.7508	41.69	26.8428	intergenic_region	cep55l-lncRNA	ENSCHAG00000010580-ENSCHAG00000010612
19	20546747	A	T	54.14	35.4475	41.5	26.7204	intergenic_region	cep55l-lncRNA	ENSCHAG00000010580-ENSCHAG00000010612
19	20548908	A	G	62.17	40.705	41.21	26.5337	intergenic_region	cep55l-lncRNA	ENSCHAG00000010580-ENSCHAG00000010612
19	20548949	T	C	62.62	40.9996	39.46	25.4069	intergenic_region	cep55l-lncRNA	ENSCHAG00000010580-ENSCHAG00000010612
19	20549528	T	C	51.7	33.8499	35.19	22.6576	intergenic_region	cep55l-lncRNA	ENSCHAG00000010580-ENSCHAG00000010612
19	20565641	A	C	76.41	50.0284	48.28	31.0858	intergenic_region	cep55l-lncRNA	ENSCHAG00000010580-ENSCHAG00000010612
19	20567286	C	A	51.41	33.66	44.3	28.5232	intergenic_region	cep55l-lncRNA	ENSCHAG00000010580-ENSCHAG00000010612
19	20567290	C	A	55.62	36.4165	40.85	26.3019	intergenic_region	cep55l-lncRNA	ENSCHAG00000010580-ENSCHAG00000010612
19	20567552	G	T	47.04	30.7988	32.18	20.7196	intergenic_region	cep55l-lncRNA	ENSCHAG00000010580-ENSCHAG00000010612
19	20567626	A	G	46.35	30.3471	39.31	25.3104	intergenic_region	cep55l-lncRNA	ENSCHAG00000010580-ENSCHAG00000010612
19	20568801	C	T	36.12	23.6491	32.56	20.9643	intergenic_region	cep55l-lncRNA	ENSCHAG00000010580-ENSCHAG00000010612
19	20568855	G	A	37.41	24.4937	34.79	22.4001	intergenic_region	cep55l-lncRNA	ENSCHAG00000010580-ENSCHAG00000010612
19	20571185	C	T	55.72	36.4819	54.64	35.1808	intergenic_region	cep55l-lncRNA	ENSCHAG00000010580-ENSCHAG00000010612
19	20572442	G	A	36.93	24.1794	37.86	24.3768	intergenic_region	cep55l-lncRNA	ENSCHAG00000010580-ENSCHAG00000010612
19	20574159	G	T	36.51	23.9044	36.47	23.4818	intergenic_region	cep55l-lncRNA	ENSCHAG00000010580-ENSCHAG00000010612
19	20576170	G	C	58.02	37.9878	59.38	38.2327	intergenic_region	cep55l-lncRNA	ENSCHAG00000010580-ENSCHAG00000010612
19	20576472	A	G	59.21	38.767	23.96	15.427	intergenic_region	cep55l-lncRNA	ENSCHAG00000010580-ENSCHAG00000010612
19	20576497	A	G	61.12	40.0175	47.57	30.6287	intergenic_region	cep55l-lncRNA	ENSCHAG00000010580-ENSCHAG00000010612
19	20576918	A	G	57.47	37.6277	54.42	35.0392	intergenic_region	cep55l-lncRNA	ENSCHAG00000010580-ENSCHAG00000010612
19	20577287	T	C	53.72	35.1725	57.67	37.1317	intergenic_region	cep55l-lncRNA	ENSCHAG00000010580-ENSCHAG00000010612
19	20577601	C	A	41.19	26.9686	34.69	22.3357	intergenic_region	cep55l-lncRNA	ENSCHAG00000010580-ENSCHAG00000010612
19	20577742	G	T	50.93	33.3458	27.84	17.9252	intergenic_region	cep55l-lncRNA	ENSCHAG00000010580-ENSCHAG00000010612
19	20577813	G	A	53.15	34.7993	26.6	17.1268	intergenic_region	cep55l-lncRNA	ENSCHAG00000010580-ENSCHAG00000010612
19	20578010	T	C	56.8	37.1891	38.09	24.5248	intergenic_region	cep55l-lncRNA	ENSCHAG00000010580-ENSCHAG00000010612
19	20578344	T	A	46.39	30.3732	31.73	20.4299	intergenic_region	cep55l-lncRNA	ENSCHAG00000010580-ENSCHAG00000010612
19	20578345	T	A	45.76	29.9608	36.21	23.3144	intergenic_region	cep55l-lncRNA	ENSCHAG00000010580-ENSCHAG00000010612
19	20582431	T	C	58.36	38.2104	28.27	18.2021	intergenic_region	cep55l-lncRNA	ENSCHAG00000010580-ENSCHAG00000010612
19	20583614	A	C	51.17	33.5029	33.67	21.679	intergenic_region	cep55l-lncRNA	ENSCHAG00000010580-ENSCHAG00000010612
19	20607466	A	G	53	34.7011	53.83	34.6593	intron_variant	herpud2	ENSCHAG00000010629
19	20607552	C	A	56.73	37.1432	46.76	30.1072	intron_variant	herpud2	ENSCHAG00000010629
19	20607562	G	C	56.53	37.0123	49.48	31.8585	intron_variant	herpud2	ENSCHAG00000010629
19	20607707	C	T	55.64	36.4296	55.69	35.8569	intron_variant	herpud2	ENSCHAG00000010629
19	20607725	A	T	57.03	37.3396	53	34.1249	intron_variant	herpud2	ENSCHAG00000010629
19	20607987	C	T	36	23.5705	36.05	23.2114	intron_variant	herpud2	ENSCHAG00000010629
19	20608343	G	A	59.26	38.7997	58.23	37.4923	intron_variant	herpud2	ENSCHAG00000010629
19	20608383	A	T	48.84	31.9774	30.88	19.8826	intron_variant	herpud2	ENSCHAG00000010629
19	20608443	C	A	50.63	33.1493	52.32	33.6871	intron_variant	herpud2	ENSCHAG00000010629
19	20608980	C	T	42.37	27.7412	44.8	28.8452	intron_variant	herpud2	ENSCHAG00000010629
19	20608998	C	T	38.9	25.4693	44.38	28.5748	intron_variant	herpud2	ENSCHAG00000010629
19	20609089	C	A	47.84	31.3226	42.23	27.1904	intron_variant	herpud2	ENSCHAG00000010629
19	20609158	T	C	45.03	29.4828	42.87	27.6025	intron_variant	herpud2	ENSCHAG00000010629
19	20609257	A	G	42.43	27.7805	39.62	25.51	intron_variant	herpud2	ENSCHAG00000010629
19	20609666	G	A	46.96	30.7464	35.91	23.1212	upstream_gene_variant	DPY19L1	ENSCHAG00000010636
19	20609937	A	T	46.37	30.3602	34.56	22.252	synonymous_variant	herpud2	ENSCHAG00000010629
19	20610035	G	T	44.98	29.4501	52.81	34.0025	upstream_gene_variant	DPY19L1	ENSCHAG00000010636
19	20610178	C	T	41.85	27.4007	32.78	21.1059	upstream_gene_variant	DPY19L1	ENSCHAG00000010636
19	20610621	G	A	46.48	30.4322	33.37	21.4858	upstream_gene_variant	DPY19L1	ENSCHAG00000010636
19	20610660	C	T	50.14	32.8285	35.05	22.5675	upstream_gene_variant	DPY19L1	ENSCHAG00000010636
19	20611818	T	C	40.95	26.8115	36.22	23.3208	synonymous_variant	herpud2	ENSCHAG00000010629
22	21753195	G	A	1.1	0.720211	52.98	34.112	upstream_gene_variant	asah1b	ENSCHAG00000011282
22	21753198	T	C	1.52	0.9952	51.97	33.4617	upstream_gene_variant	asah1b	ENSCHAG00000011282
22	21753199	T	C	1.74	1.13924	52.11	33.5518	upstream_gene_variant	asah1b	ENSCHAG00000011282
22	21753573	T	G	1.6	1.04758	52.91	34.0669	upstream_gene_variant	asah1b	ENSCHAG00000011282
