# Supplementary material for: Ecological adaptation in Atlantic herring is associated with large shifts in allele frequencies at hundreds of loci
Source: eLife journal article supplement (doi:10.7554/elife.61076), 2020-12-04
Supplement: supp [file elife-61076-supp-v1.zip › elife_poa_e61076_Supplementary_file_7.xlsx]

## Sheet: Sheet1
Supplementary File 7. Reference allele frequencies for the 794 markers used in the PCA shown in Fig 2b.
CHROM	POS	A_Kalix_Baltic_Spring	B_Vaxholm_Baltic_Spring	DalBoB_Atlantic_Autumn	DalGeB_Atlantic_Autumn	DalInB_Atlantic_Spring	DalNsF_Atlantic_Autumn	DalNsS_Atlantic_Spring	G_Gamleby_Baltic_Spring	HGS10_Downs_EnglishChannel_Winter	HGS11_RingkobingFjord_NorthSea_Spring	HGS12_BornholmBasin_Baltic_Autumn	HGS15_NSSH_Atlantic_Spring	HGS16_Orkney_NorthSea_Autumn	HGS17_IsleOfMan_IrishSea_Autumn	HGS18_CelticSea_Atlantic_AutumnWinter	HGS19_TeelinBay_Atlantic_Winter	HGS1_Riga_Baltic_Spring	HGS20_CapeWrath_Atlantic_Spring	HGS21_Hebrides_Atlantic_Mixed	HGS22_CapeWrath_Atlantic_Autumn	HGS23_Clyde_Atlantic_Spring	HGS24_Landvik_Atlantic_Spring	HGS25_Lindas_Atlantic_Spring	HGS26_Lusterfjorden_Atlantic_Spring	HGS27_Gloppen_Atlantic_Spring	HGS2_Riga_Baltic_Spring	HGS3_Riga_Baltic_Autumn	HGS4_Riga_Baltic_Autumn	HGS5_Schlei_Baltic_Autumn	HGS6_Schlei_Baltic_Spring	HGS71_Rugen_Baltic_Spring	HGS72_Rugen_Baltic_Spring	HGS8_KattegatNorth_Atlantic_Spring	HGS9_Greenland_Atlantic_Spring	H_Fehmarn_Baltic_Autumn	J_Traslovslage_Baltic_Spring	LandvikS17_Norway_Baltic_Spring	N_NorthSea_Atlantic_Autumn	O_Hamburgsund_Atlantic_Spring	PB10_Skagerrak_Atlantic_Spring	PB11_Kalmar_Baltic_Spring	PB12_Karlskrona_Baltic_Spring	PB1_HastKar_Baltic_Spring	PB2_Iceland_Atlantic_Spring	PB4_Hudiksvall_Baltic_Spring	PB5_Galve_Baltic_Spring	PB6_Galve_Baltic_Summer	PB7_Galve_Baltic_Autumn
chr1	49996	0.45	0.53	0.77	0.8	0.18	0.67	0.27	0.68	0.29	0.04	0.38	0.69	0.16	0.41	0.23	0.33	0.53	0.54	0.24	0.34	0.28	0.29	0.47	0.45	0.44	0.38	0.42	0.32	0.03	0.03	0.21	0.39	0.31	0.91	0.32	0.21	0.19	0.39	0.22	0.27	0.56	0.68	0.47	0.54	0.68	0.5	0.45	0.4
chr1	4476806	0.8	0.7	0.1	0.14	0.06	0.05	0.2	0.79	0.15	0.68	0.82	0.09	0.04	0.12	0.08	0.07	0.64	0.12	0.23	0.06	0.23	0.48	0.13	0.0	0.03	0.8	0.41	0.5	0.83	0.75	0.75	0.67	0.39	0.19	0.53	0.58	0.28	0.06	0.24	0.39	0.79	0.71	0.77	0.24	0.65	0.61	0.75	0.42
chr1	11315569	0.77	0.86	1.0	1.0	1.0	1.0	1.0	0.68	1.0	0.54	0.84	1.0	1.0	1.0	1.0	1.0	0.76	0.94	1.0	1.0	1.0	0.5	0.81	0.9	0.97	0.78	0.81	0.61	0.38	0.46	0.36	0.35	0.89	1.0	0.78	0.29	0.64	1.0	0.58	0.5	0.64	0.73	0.89	1.0	0.82	0.79	0.73	0.86
chr1	11329331	0.13	0.04	0.38	0.52	0.6	0.5	0.38	0.0	0.44	0.0	0.15	0.59	0.35	0.44	0.56	0.3	0.02	0.35	0.52	0.38	0.33	0.17	0.54	0.52	0.52	0.11	0.04	0.1	0.06	0.18	0.0	0.12	0.56	0.61	0.1	0.18	0.5	0.45	0.4	0.22	0.07	0.04	0.07	0.39	0.14	0.0	0.05	0.06
chr1	11354293	0.11	0.06	0.4	0.41	0.65	0.42	0.26	0.13	0.46	0.0	0.06	0.71	0.52	0.23	0.5	0.48	0.06	0.39	0.5	0.48	0.3	0.21	0.62	0.48	0.46	0.22	0.1	0.08	0.0	0.19	0.05	0.1	0.58	0.48	0.14	0.26	0.46	0.32	0.41	0.28	0.0	0.07	0.09	0.46	0.15	0.0	0.07	0.0
chr1	12294375	0.39	0.32	0.85	0.89	0.59	0.89	0.68	0.26	0.72	0.75	0.63	0.88	0.81	0.69	0.81	1.0	0.46	0.88	0.88	0.8	0.67	0.85	0.67	0.65	0.71	0.33	0.63	0.62	0.67	0.64	0.74	0.71	0.93	1.0	0.83	0.87	0.8	0.89	0.69	0.63	0.42	0.27	0.42	0.83	0.48	0.33	0.33	0.45
chr1	12315275	0.79	0.33	0.9	1.0	1.0	1.0	1.0	0.25	0.92	0.83	0.62	1.0	0.86	0.97	1.0	1.0	0.53	1.0	0.97	1.0	1.0	0.69	0.82	0.88	0.8	0.66	0.84	0.72	0.48	0.72	0.68	0.56	0.93	0.96	1.0	0.82	0.92	1.0	0.79	0.88	0.53	0.59	0.53	0.93	0.74	0.43	0.42	0.64
chr1	12481213	0.39	0.18	0.0	0.0	0.0	0.0	0.0	0.34	0.0	0.45	0.55	0.0	0.0	0.0	0.0	0.0	0.47	0.0	0.03	0.04	0.08	0.41	0.0	0.13	0.09	0.44	0.56	0.59	0.44	0.38	0.19	0.37	0.17	0.0	0.6	0.41	0.31	0.0	0.17	0.22	0.32	0.27	0.15	0.0	0.32	0.06	0.29	0.7
chr1	12497699	0.64	0.51	0.29	0.37	0.32	0.45	0.18	0.69	0.23	0.71	0.71	0.26	0.29	0.2	0.27	0.3	0.45	0.15	0.3	0.34	0.21	0.68	0.36	0.31	0.28	0.59	0.77	0.65	0.64	0.74	0.5	0.67	0.56	0.11	0.83	0.61	0.8	0.19	0.41	0.6	0.67	0.57	0.56	0.14	0.73	0.62	0.57	0.83
chr1	12930404	0.29	0.14	0.64	0.74	0.75	0.67	0.65	0.38	0.84	0.61	0.39	0.63	0.81	0.76	0.7	0.79	0.39	0.75	0.69	0.76	0.64	0.56	0.59	0.73	0.61	0.29	0.62	0.42	0.41	0.67	0.7	0.23	0.61	0.6	0.56	0.63	0.71	0.88	0.73	0.73	0.15	0.36	0.09	0.89	0.22	0.17	0.32	0.71
chr1	13056379	0.45	0.48	0.84	0.93	1.0	1.0	0.86	0.57	0.93	1.0	0.74	0.85	0.93	0.87	0.95	0.87	0.61	1.0	0.84	0.87	0.91	0.97	0.97	1.0	1.0	0.51	0.72	0.54	0.94	0.97	1.0	0.9	0.97	0.81	0.6	0.81	1.0	0.84	0.92	1.0	0.43	0.37	0.33	1.0	0.59	0.46	0.39	0.73
chr1	13078246	0.35	0.15	0.8	0.79	0.73	1.0	0.93	0.52	0.71	0.77	0.67	0.85	0.76	0.73	0.9	0.83	0.6	0.93	0.71	0.87	0.86	0.72	0.8	0.96	0.86	0.61	0.65	0.61	1.0	0.88	0.84	0.78	0.7	0.96	0.43	0.72	0.9	0.84	0.81	0.71	0.41	0.32	0.48	0.94	0.29	0.41	0.31	0.53
chr1	13317786	0.84	0.89	0.25	0.11	0.53	0.18	0.25	0.91	0.79	0.66	0.6	0.33	0.37	0.43	0.48	0.52	0.8	0.53	0.48	0.38	0.1	0.44	0.19	0.47	0.75	0.69	0.66	0.62	0.87	0.68	0.9	0.63	0.76	0.16	0.61	0.81	0.42	0.57	0.56	0.44	0.88	0.85	0.79	0.38	0.77	0.86	0.68	0.66
chr1	13358387	0.94	0.94	0.5	0.24	0.47	0.33	0.34	0.9	0.53	0.68	0.68	0.35	0.58	0.39	0.39	0.29	0.96	0.34	0.39	0.34	0.24	0.8	0.34	0.53	0.33	0.9	0.74	0.67	0.76	0.83	0.83	0.77	0.54	0.29	0.72	1.0	0.79	0.74	0.62	0.52	0.84	1.0	0.96	0.38	1.0	0.9	0.89	0.68
chr1	13493087	0.27	0.31	0.84	0.89	0.95	0.95	0.89	0.27	0.42	0.41	0.56	0.79	0.67	0.62	0.75	0.74	0.12	0.67	0.5	0.58	0.88	0.59	0.91	0.75	0.77	0.24	0.43	0.43	0.43	0.38	0.21	0.36	0.58	0.77	0.55	0.42	0.73	0.7	0.72	0.8	0.33	0.24	0.17	0.93	0.2	0.29	0.08	0.25
chr1	13536914	0.28	0.1	0.54	0.63	0.5	0.52	0.58	0.09	0.39	0.27	0.25	0.62	0.37	0.33	0.41	0.65	0.12	0.48	0.33	0.59	0.63	0.62	0.66	0.77	0.67	0.13	0.06	0.07	0.29	0.3	0.27	0.31	0.71	0.57	0.09	0.12	0.52	0.49	0.56	0.45	0.09	0.0	0.0	0.82	0.06	0.15	0.06	0.08
chr1	13566264	0.38	0.26	0.81	0.93	0.81	0.94	0.97	0.54	0.9	0.59	0.71	0.96	0.92	0.79	0.92	0.92	0.51	0.87	0.93	0.9	0.88	0.63	0.87	0.9	0.84	0.5	0.51	0.56	0.46	0.64	0.74	0.63	0.97	0.57	0.44	0.65	0.5	0.85	0.76	0.87	0.43	0.5	0.25	0.89	0.38	0.45	0.39	0.58
chr1	13587652	0.36	0.26	0.78	0.79	0.76	0.74	0.87	0.55	0.8	0.86	0.65	0.83	0.96	0.79	0.95	0.96	0.45	0.86	0.9	0.89	0.89	0.97	0.92	0.87	0.97	0.44	0.62	0.54	1.0	0.85	1.0	0.89	0.96	0.74	0.58	0.81	0.75	0.88	0.87	0.94	0.49	0.48	0.31	0.82	0.36	0.63	0.38	0.61
chr1	13976708	0.55	0.63	0.27	0.29	0.18	0.16	0.1	0.55	0.0	0.0	0.5	0.13	0.3	0.18	0.05	0.08	0.47	0.23	0.08	0.17	0.08	0.04	0.15	0.0	0.03	0.47	0.36	0.42	0.24	0.15	0.09	0.19	0.1	0.17	0.51	0.26	0.0	0.12	0.06	0.05	0.52	0.64	0.68	0.26	0.47	0.61	0.59	0.62
chr1	14028564	0.77	0.67	0.25	0.5	0.22	0.15	0.11	0.52	0.15	0.17	0.44	0.14	0.41	0.32	0.24	0.4	0.61	0.0	0.44	0.1	0.25	0.31	0.06	0.12	0.08	0.58	0.37	0.56	0.14	0.28	0.17	0.22	0.2	0.24	0.38	0.25	0.0	0.06	0.13	0.13	0.58	0.58	0.63	0.26	0.57	0.61	0.59	0.33
chr1	14209424	0.79	0.58	0.51	0.42	0.2	0.42	0.28	0.45	0.32	0.68	0.5	0.11	0.08	0.38	0.25	0.37	0.75	0.44	0.07	0.39	0.31	0.45	0.41	0.33	0.31	0.69	0.69	0.74	0.47	0.58	0.45	0.54	0.45	0.42	0.62	0.68	0.36	0.21	0.29	0.37	0.67	0.77	0.88	0.28	0.76	0.73	0.83	0.64
chr1	14303465	0.6	0.42	0.91	1.0	0.72	1.0	0.96	0.65	0.9	1.0	0.77	0.92	0.97	1.0	1.0	1.0	0.4	0.81	0.92	0.94	0.96	0.9	0.88	0.94	0.97	0.4	0.66	0.73	0.9	0.88	1.0	0.88	0.79	0.85	0.78	0.86	1.0	0.97	0.74	0.95	0.39	0.55	0.44	1.0	0.55	0.41	0.47	0.54
chr1	17268340	0.79	0.77	0.31	0.35	0.45	0.48	0.36	0.77	0.37	0.24	0.32	0.41	0.3	0.34	0.39	0.5	0.34	0.32	0.31	0.29	0.27	0.31	0.43	0.5	0.5	0.29	0.22	0.28	0.09	0.16	0.03	0.18	0.37	0.23	0.81	0.52	0.19	0.79	0.71	0.53	0.59	0.77	0.55	0.57	0.82	0.55	0.75	0.45
chr1	17423978	0.81	0.78	0.75	0.73	0.68	0.85	0.64	0.82	0.83	0.37	0.88	0.82	0.87	0.62	0.88	0.69	0.88	0.48	0.68	0.82	0.86	0.5	0.88	0.75	0.79	0.81	0.7	0.87	0.04	0.28	0.21	0.47	0.73	0.71	0.68	0.36	0.23	0.64	0.69	0.59	0.84	0.81	0.78	0.85	0.96	0.89	0.9	0.79
chr1	17461903	0.89	0.87	0.73	0.74	0.72	0.71	0.77	0.95	0.82	0.33	0.71	0.68	0.86	0.67	0.72	0.69	0.87	0.79	0.79	0.75	0.65	0.31	0.69	0.74	0.61	0.85	0.85	0.91	0.11	0.34	0.2	0.23	0.58	0.47	0.75	0.38	0.32	0.64	0.63	0.53	0.92	0.85	1.0	0.81	0.89	0.89	0.92	0.89
chr1	17486508	0.93	1.0	1.0	1.0	1.0	1.0	1.0	1.0	1.0	0.48	0.75	1.0	1.0	1.0	1.0	1.0	0.95	1.0	1.0	1.0	0.97	0.71	1.0	1.0	1.0	0.87	0.93	0.84	0.55	0.52	0.2	0.47	0.9	1.0	0.82	0.5	0.56	1.0	0.88	0.81	0.95	0.97	1.0	1.0	1.0	1.0	1.0	0.84
chr1	17529274	0.88	0.79	0.95	1.0	0.85	0.92	1.0	1.0	0.83	0.55	0.77	0.83	0.97	0.9	0.92	1.0	0.94	0.9	0.89	0.91	0.94	0.54	0.86	1.0	0.97	0.93	0.88	0.91	0.16	0.35	0.24	0.43	0.76	1.0	0.65	0.59	0.42	0.87	0.9	0.63	0.81	0.88	0.89	0.77	0.88	0.97	0.9	0.84
chr1	17544790	0.22	0.3	0.53	0.42	0.56	0.39	0.57	0.2	0.31	0.9	0.5	0.35	0.55	0.24	0.28	0.36	0.26	0.6	0.3	0.27	0.29	0.74	0.44	0.56	0.54	0.18	0.49	0.41	0.97	0.93	0.95	0.75	0.38	0.26	0.42	0.81	0.88	0.6	0.7	0.71	0.35	0.17	0.37	0.5	0.25	0.09	0.21	0.32
chr1	17630232	0.9	1.0	1.0	1.0	1.0	1.0	1.0	1.0	1.0	0.45	0.76	1.0	1.0	1.0	1.0	1.0	0.93	1.0	1.0	1.0	1.0	0.57	1.0	1.0	1.0	0.94	0.92	0.86	0.15	0.38	0.29	0.41	0.96	1.0	0.84	0.43	0.36	1.0	0.82	0.82	0.88	1.0	1.0	1.0	0.97	1.0	1.0	0.92
chr1	17706461	0.88	0.86	0.53	0.64	0.6	0.43	0.39	0.78	0.24	0.83	0.86	0.7	0.57	0.36	0.33	0.26	0.81	0.32	0.36	0.5	0.43	0.63	0.56	0.54	0.56	0.8	0.84	0.85	1.0	0.94	1.0	0.97	0.64	0.35	0.69	0.9	0.93	0.47	0.44	0.74	0.85	0.78	0.85	0.61	0.85	0.81	0.85	0.68
chr1	17773926	0.64	0.37	0.92	0.87	0.95	0.91	0.96	0.32	0.9	0.95	0.64	0.97	0.89	0.9	1.0	0.89	0.58	0.96	0.79	0.86	1.0	0.88	0.89	0.85	0.94	0.49	0.63	0.44	0.95	0.87	1.0	0.85	0.97	0.75	0.81	0.93	0.88	0.97	0.94	1.0	0.4	0.33	0.41	0.88	0.27	0.53	0.41	0.61
chr1	17820418	0.23	0.31	0.92	0.89	0.8	0.7	0.9	0.13	0.96	0.29	0.43	0.95	0.84	0.86	1.0	0.92	0.29	0.93	0.89	0.91	0.92	0.45	0.9	0.83	1.0	0.24	0.47	0.39	0.0	0.14	0.0	0.15	0.82	0.65	0.53	0.3	0.48	0.92	0.91	0.89	0.29	0.26	0.28	0.84	0.05	0.29	0.33	0.27
chr1	17897754	1.0	0.96	0.42	0.38	0.5	0.41	0.33	1.0	0.5	0.74	0.86	0.53	0.55	0.59	0.56	0.59	1.0	0.48	0.5	0.5	0.6	0.8	0.61	0.53	0.62	1.0	0.93	0.96	0.96	0.78	1.0	0.91	0.63	0.3	0.85	0.9	0.72	0.53	0.43	0.48	1.0	1.0	1.0	0.58	1.0	1.0	1.0	1.0
chr1	17956423	0.27	0.24	0.93	0.97	1.0	0.89	0.95	0.14	1.0	0.55	0.48	0.84	0.91	0.97	0.97	1.0	0.41	0.9	0.92	0.96	0.93	0.65	0.97	0.97	1.0	0.27	0.42	0.26	0.39	0.5	0.09	0.49	0.93	0.9	0.45	0.52	0.59	0.97	0.95	0.75	0.31	0.24	0.3	0.93	0.23	0.36	0.31	0.39
chr1	18005616	0.9	0.71	0.18	0.14	0.05	0.12	0.08	0.58	0.23	0.5	0.68	0.06	0.07	0.21	0.08	0.15	0.69	0.14	0.16	0.03	0.03	0.43	0.21	0.43	0.11	0.71	0.7	0.67	0.67	0.35	0.74	0.55	0.48	0.41	0.72	0.52	0.56	0.18	0.31	0.27	0.78	0.78	0.61	0.24	0.67	0.93	0.79	0.88
chr1	18054721	0.4	0.5	0.94	0.92	1.0	1.0	1.0	0.47	1.0	0.77	0.64	0.97	1.0	1.0	1.0	1.0	0.58	1.0	1.0	1.0	1.0	0.86	0.94	1.0	1.0	0.4	0.52	0.44	0.38	0.56	0.53	0.57	0.94	0.95	0.7	0.65	0.79	0.93	0.93	0.88	0.59	0.48	0.38	1.0	0.37	0.36	0.54	0.5
chr1	18086994	0.21	0.28	0.74	0.79	0.83	0.64	0.9	0.31	0.78	0.46	0.58	0.7	0.81	0.74	0.61	0.77	0.37	0.9	0.85	0.78	0.67	0.69	0.62	0.67	0.52	0.36	0.36	0.38	0.38	0.53	0.28	0.59	0.71	0.75	0.54	0.42	0.79	0.81	0.6	0.83	0.35	0.47	0.27	0.62	0.17	0.24	0.18	0.32
chr1	18122244	0.27	0.32	0.67	0.79	0.67	0.84	0.79	0.27	0.87	0.83	0.5	0.89	0.7	0.71	0.9	0.79	0.51	0.79	0.9	0.91	0.81	0.68	0.87	0.93	0.9	0.42	0.47	0.49	0.48	0.55	0.5	0.61	0.71	0.62	0.54	0.67	0.82	0.84	0.71	0.68	0.47	0.34	0.25	0.83	0.38	0.27	0.43	0.42
chr1	18141043	0.85	0.84	0.49	0.42	0.26	0.63	0.35	0.86	0.23	0.82	0.76	0.44	0.39	0.29	0.48	0.48	0.83	0.61	0.33	0.45	0.7	0.6	0.4	0.69	0.41	0.8	0.84	0.77	0.62	0.7	0.33	0.62	0.42	0.41	0.7	0.61	0.46	0.5	0.41	0.51	0.72	0.82	0.75	0.37	0.93	1.0	0.84	0.89
chr1	18215423	0.23	0.31	0.71	0.86	0.96	0.74	0.81	0.48	0.61	0.74	0.39	0.91	0.71	0.71	0.71	0.87	0.35	0.87	0.76	0.87	0.9	0.55	0.8	0.74	0.68	0.34	0.3	0.43	0.5	0.62	0.39	0.53	0.82	0.71	0.5	0.57	0.58	0.81	0.85	0.82	0.39	0.26	0.38	0.58	0.22	0.17	0.32	0.32
chr1	18279430	0.29	0.43	0.97	0.93	1.0	0.81	1.0	0.44	0.9	0.87	0.71	0.94	0.94	0.92	0.87	0.85	0.59	0.97	0.9	0.86	0.9	0.88	0.86	0.92	0.94	0.39	0.49	0.65	0.89	0.78	0.81	0.76	1.0	0.74	0.6	0.79	1.0	1.0	0.94	0.91	0.58	0.49	0.35	0.86	0.27	0.42	0.39	0.48
chr1	18797413	0.7	0.41	1.0	1.0	1.0	1.0	1.0	0.52	1.0	0.5	0.45	1.0	1.0	1.0	1.0	1.0	0.48	1.0	1.0	1.0	1.0	0.83	1.0	1.0	1.0	0.61	0.46	0.48	0.62	0.84	0.82	0.68	0.97	1.0	0.59	0.7	0.57	1.0	0.87	0.83	0.41	0.46	0.47	1.0	0.39	0.4	0.58	0.61
chr1	18813602	0.67	0.51	0.9	1.0	0.91	0.88	0.89	0.41	0.92	0.62	0.45	0.77	0.87	0.92	0.75	0.96	0.48	0.96	0.83	0.93	0.96	0.67	0.93	0.93	0.86	0.49	0.47	0.53	0.46	0.72	0.52	0.6	0.9	1.0	0.55	0.55	0.73	0.93	0.74	0.76	0.55	0.47	0.34	0.9	0.58	0.42	0.49	0.39
chr1	18857148	0.46	0.4	0.98	1.0	1.0	1.0	1.0	0.42	1.0	0.62	0.57	1.0	0.84	1.0	0.93	0.92	0.52	1.0	1.0	1.0	0.88	0.85	0.96	0.97	0.91	0.46	0.47	0.46	0.77	0.77	0.47	0.6	1.0	1.0	0.57	0.59	0.79	1.0	0.89	0.89	0.59	0.44	0.43	1.0	0.4	0.67	0.51	0.36
chr1	18882147	0.56	0.32	1.0	1.0	1.0	1.0	1.0	0.45	1.0	0.5	0.57	1.0	1.0	1.0	1.0	1.0	0.49	1.0	1.0	1.0	1.0	0.9	1.0	1.0	1.0	0.54	0.6	0.54	0.57	0.78	0.73	0.67	0.97	1.0	0.63	0.74	0.65	1.0	1.0	0.89	0.59	0.39	0.5	1.0	0.43	0.51	0.58	0.72
chr1	18918483	0.24	0.31	0.64	0.76	0.65	0.62	0.63	0.25	0.56	0.38	0.21	0.64	0.77	0.68	0.62	0.58	0.25	0.48	0.82	0.72	0.53	0.56	0.51	0.64	0.5	0.24	0.22	0.26	0.37	0.48	0.26	0.33	0.56	0.59	0.33	0.33	0.25	0.54	0.58	0.64	0.27	0.13	0.24	0.63	0.19	0.17	0.1	0.18
chr1	18955050	0.65	0.58	1.0	1.0	1.0	1.0	1.0	0.58	1.0	0.5	0.58	1.0	0.97	1.0	1.0	1.0	0.5	1.0	1.0	1.0	1.0	0.91	1.0	1.0	1.0	0.45	0.54	0.46	0.53	0.72	0.67	0.59	0.97	1.0	0.59	0.68	0.72	1.0	0.97	0.82	0.53	0.59	0.62	1.0	0.44	0.58	0.61	0.58
chr1	18978410	0.54	0.56	1.0	0.97	1.0	1.0	1.0	0.52	1.0	0.5	0.71	1.0	0.89	1.0	1.0	1.0	0.55	0.93	1.0	1.0	1.0	0.92	1.0	1.0	0.97	0.41	0.54	0.53	0.41	0.7	0.57	0.6	0.97	1.0	0.57	0.6	0.66	0.98	0.95	0.93	0.62	0.55	0.59	1.0	0.46	0.57	0.62	0.44
chr1	19030227	0.48	0.57	0.86	0.93	0.89	0.92	0.91	0.52	0.85	0.63	0.48	0.9	0.91	0.97	1.0	0.94	0.59	0.88	0.89	0.91	0.77	0.8	0.77	0.87	0.84	0.49	0.52	0.4	0.69	0.64	0.42	0.71	0.94	1.0	0.59	0.76	0.62	0.9	0.89	0.8	0.56	0.48	0.32	0.89	0.39	0.38	0.39	0.52
chr1	19052312	0.59	0.56	0.97	1.0	1.0	1.0	1.0	0.39	0.93	0.61	0.55	1.0	1.0	1.0	1.0	1.0	0.62	1.0	1.0	1.0	1.0	0.87	1.0	1.0	1.0	0.53	0.53	0.66	0.52	0.79	0.48	0.65	0.97	0.96	0.63	0.69	0.69	1.0	0.92	0.9	0.65	0.4	0.44	0.95	0.58	0.49	0.63	0.56
chr1	19073925	0.63	0.62	1.0	1.0	1.0	1.0	1.0	0.44	1.0	0.58	0.58	1.0	1.0	1.0	1.0	1.0	0.54	1.0	1.0	1.0	1.0	0.86	1.0	1.0	1.0	0.55	0.46	0.52	0.59	0.72	0.75	0.68	0.97	1.0	0.51	0.59	0.67	1.0	1.0	1.0	0.68	0.48	0.5	1.0	0.32	0.43	0.7	0.43
chr1	19117558	0.83	0.63	0.95	1.0	1.0	1.0	0.97	0.5	0.93	0.58	0.62	1.0	0.96	0.81	0.97	1.0	0.62	0.97	1.0	0.9	1.0	0.69	0.84	0.88	0.95	0.42	0.63	0.57	0.61	0.79	0.65	0.5	0.92	0.96	0.62	0.61	0.68	0.92	0.92	0.85	0.59	0.48	0.37	1.0	0.52	0.54	0.53	0.43
chr1	19136592	0.81	0.52	1.0	1.0	1.0	1.0	1.0	0.49	1.0	0.69	0.8	1.0	1.0	1.0	1.0	1.0	0.48	0.93	1.0	1.0	1.0	0.92	0.94	1.0	1.0	0.5	0.68	0.53	0.45	0.83	0.55	0.64	0.94	1.0	0.62	0.61	0.55	0.98	1.0	0.91	0.64	0.57	0.38	1.0	0.32	0.31	0.56	0.57
chr1	19158712	0.48	0.39	0.89	0.85	0.83	1.0	0.86	0.23	0.72	0.48	0.55	0.94	0.68	0.69	0.96	0.93	0.14	0.71	0.92	0.92	0.85	0.68	0.81	0.72	0.84	0.22	0.48	0.35	0.55	0.69	0.67	0.48	0.58	0.65	0.44	0.51	0.5	0.96	0.67	0.84	0.37	0.24	0.18	0.89	0.23	0.23	0.19	0.26
chr1	19177041	0.85	0.54	1.0	1.0	1.0	1.0	1.0	0.5	1.0	0.48	0.7	1.0	1.0	1.0	1.0	1.0	0.54	1.0	1.0	1.0	1.0	0.8	1.0	1.0	1.0	0.62	0.67	0.49	0.71	0.68	0.62	0.66	0.95	1.0	0.7	0.66	0.74	1.0	0.94	0.77	0.61	0.61	0.61	1.0	0.4	0.64	0.61	0.45
chr1	19226286	0.6	0.6	1.0	1.0	1.0	1.0	1.0	0.57	1.0	0.58	0.77	1.0	1.0	1.0	1.0	1.0	0.54	0.96	1.0	1.0	1.0	0.93	1.0	1.0	1.0	0.54	0.53	0.49	0.55	0.83	0.6	0.68	0.97	1.0	0.62	0.63	0.71	1.0	1.0	0.93	0.64	0.56	0.4	1.0	0.56	0.66	0.57	0.56
chr1	19291085	0.7	0.64	1.0	1.0	1.0	1.0	1.0	0.63	0.97	0.5	0.59	1.0	1.0	1.0	1.0	1.0	0.69	0.92	1.0	1.0	1.0	0.85	1.0	1.0	1.0	0.59	0.66	0.65	0.47	0.69	0.67	0.62	0.92	1.0	0.66	0.7	0.78	1.0	0.87	0.92	0.68	0.5	0.5	1.0	0.49	0.5	0.54	0.42
chr1	19304466	0.64	0.53	1.0	1.0	1.0	1.0	1.0	0.53	1.0	0.53	0.67	1.0	1.0	1.0	1.0	1.0	0.58	1.0	1.0	1.0	1.0	0.88	1.0	1.0	1.0	0.62	0.65	0.71	0.56	0.81	0.53	0.59	0.96	1.0	0.67	0.68	0.81	1.0	1.0	0.89	0.65	0.52	0.62	1.0	0.4	0.36	0.55	0.44
chr1	19317179	0.84	0.69	1.0	1.0	1.0	1.0	1.0	0.5	1.0	0.75	0.62	1.0	0.97	1.0	1.0	1.0	0.64	1.0	1.0	1.0	1.0	0.85	0.94	1.0	1.0	0.52	0.51	0.57	0.58	0.69	0.64	0.66	0.94	1.0	0.69	0.68	0.63	1.0	0.97	0.9	0.55	0.58	0.48	1.0	0.48	0.44	0.61	0.42
chr1	19357149	0.69	0.68	0.98	1.0	1.0	1.0	1.0	0.56	0.97	0.48	0.54	0.97	0.96	1.0	1.0	1.0	0.5	0.94	1.0	1.0	1.0	0.93	1.0	1.0	1.0	0.49	0.56	0.62	0.71	0.72	0.6	0.7	0.97	0.96	0.72	0.75	0.83	1.0	1.0	0.9	0.55	0.61	0.38	1.0	0.53	0.45	0.66	0.53
chr1	19397094	0.33	0.37	0.76	0.71	0.7	0.73	0.53	0.42	0.71	0.06	0.39	0.85	0.69	0.51	0.58	0.62	0.15	0.65	0.55	0.74	0.55	0.5	0.67	0.65	0.82	0.17	0.23	0.22	0.44	0.42	0.17	0.27	0.74	0.78	0.36	0.44	0.42	0.67	0.43	0.72	0.31	0.24	0.32	0.7	0.24	0.21	0.35	0.18
chr1	19421483	0.78	0.57	0.97	1.0	1.0	1.0	1.0	0.27	1.0	0.59	0.77	1.0	1.0	0.97	1.0	1.0	0.64	1.0	1.0	1.0	1.0	0.85	0.97	1.0	1.0	0.56	0.59	0.64	0.62	0.82	0.67	0.63	0.94	1.0	0.76	0.69	0.84	1.0	0.88	1.0	0.57	0.58	0.33	1.0	0.54	0.57	0.56	0.54
chr1	19470265	0.76	0.69	1.0	1.0	0.95	1.0	1.0	0.56	0.9	0.52	0.62	0.9	0.85	1.0	0.93	1.0	0.57	1.0	1.0	1.0	1.0	0.82	1.0	0.97	0.97	0.69	0.48	0.51	0.53	0.72	0.58	0.66	1.0	0.96	0.56	0.61	0.7	0.97	0.92	0.88	0.55	0.3	0.64	1.0	0.49	0.39	0.56	0.71
chr1	19516116	0.66	0.64	0.82	0.93	1.0	1.0	1.0	0.53	1.0	0.53	0.85	1.0	1.0	1.0	0.97	0.97	0.59	0.88	1.0	1.0	1.0	0.81	1.0	1.0	0.91	0.48	0.55	0.52	0.75	0.87	0.62	0.59	0.84	1.0	0.62	0.58	0.68	1.0	0.93	0.83	0.54	0.53	0.39	1.0	0.47	0.52	0.56	0.58
chr1	19541295	0.72	0.49	0.23	0.21	0.11	0.48	0.26	0.73	0.4	0.54	0.82	0.25	0.31	0.38	0.33	0.14	0.8	0.19	0.24	0.28	0.33	0.56	0.41	0.17	0.53	0.67	0.74	0.75	0.66	0.74	0.81	0.7	0.42	0.0	0.74	0.76	0.52	0.37	0.62	0.42	0.68	0.66	0.72	0.28	0.76	0.75	0.73	0.78
chr1	19579289	0.83	0.59	0.25	0.33	0.25	0.5	0.33	0.59	0.54	0.79	0.77	0.45	0.29	0.4	0.57	0.32	0.93	0.38	0.26	0.37	0.25	0.63	0.54	0.4	0.45	0.75	0.8	0.75	0.54	0.61	0.68	0.69	0.35	0.1	0.78	0.75	0.6	0.34	0.68	0.48	0.68	0.64	0.7	0.39	0.86	0.9	0.77	0.86
chr1	19627708	0.8	0.65	1.0	1.0	1.0	1.0	1.0	0.55	0.93	0.5	0.64	1.0	1.0	1.0	1.0	1.0	0.68	0.91	1.0	1.0	0.9	1.0	1.0	1.0	1.0	0.53	0.53	0.47	0.38	0.67	0.61	0.75	1.0	1.0	0.61	0.57	0.87	1.0	0.94	0.96	0.68	0.46	0.67	1.0	0.6	0.6	0.57	0.67
chr1	28925537	0.68	0.66	1.0	0.97	1.0	1.0	1.0	0.5	1.0	0.55	0.97	0.96	1.0	1.0	0.93	0.97	0.53	1.0	0.97	1.0	1.0	0.64	1.0	0.8	0.91	0.67	0.89	0.81	0.27	0.71	0.38	0.46	0.94	0.95	0.88	0.46	0.56	0.95	0.81	0.85	0.46	0.65	0.67	1.0	0.62	0.68	0.44	0.97
chr1	28952780	0.71	0.56	1.0	1.0	1.0	1.0	1.0	0.35	1.0	0.59	0.85	1.0	1.0	1.0	1.0	1.0	0.48	1.0	1.0	1.0	1.0	0.8	1.0	0.92	1.0	0.44	0.84	0.81	0.62	0.66	0.55	0.5	0.97	1.0	0.87	0.6	0.54	1.0	0.75	0.71	0.56	0.53	0.56	1.0	0.57	0.64	0.57	0.86
chr1	29138837	0.57	0.33	0.78	0.74	0.8	0.87	0.83	0.6	0.75	0.41	0.66	0.91	0.86	0.85	0.88	1.0	0.38	0.81	0.72	0.85	0.8	0.63	0.77	0.62	0.71	0.43	0.68	0.78	0.36	0.4	0.6	0.42	0.34	0.89	0.56	0.5	0.32	0.85	0.6	0.66	0.44	0.18	0.43	0.89	0.53	0.4	0.37	0.76
chr1	29195042	0.62	0.5	0.94	0.92	0.47	0.67	0.54	0.63	0.71	0.16	0.8	0.83	0.92	0.85	0.78	1.0	0.62	0.88	0.85	0.85	0.8	0.64	0.9	0.81	0.68	0.61	0.62	0.62	0.43	0.12	0.43	0.27	0.72	1.0	0.69	0.33	0.44	0.84	0.48	0.52	0.68	0.53	0.73	0.79	0.67	0.47	0.56	0.72
chr1	29845468	0.43	0.59	0.87	0.79	0.88	0.87	0.91	0.43	0.88	0.52	0.62	0.83	0.79	0.78	0.92	0.89	0.68	0.84	0.86	0.93	0.87	0.74	0.75	0.73	0.91	0.55	0.71	0.68	0.38	0.42	0.33	0.41	0.77	0.92	0.57	0.32	0.56	0.91	0.84	0.56	0.36	0.59	0.73	0.96	0.39	0.35	0.57	0.47
chr2	3204469	0.75	0.71	0.5	0.27	0.12	0.38	0.04	0.89	0.69	0.86	0.56	0.58	0.74	0.76	0.79	0.65	0.67	0.42	0.56	0.84	0.31	0.52	0.7	0.41	0.57	0.68	0.73	0.54	0.92	0.93	0.81	0.84	0.4	0.52	0.55	0.81	0.78	0.83	0.66	0.39	0.83	0.78	0.48	0.62	0.86	0.75	0.67	0.48
chr2	4873730	0.29	0.47	0.77	0.69	0.87	0.67	0.71	0.41	0.83	0.4	0.46	0.66	0.8	0.81	0.85	0.79	0.29	0.65	0.68	0.81	0.88	0.62	0.77	0.72	0.76	0.39	0.39	0.41	0.33	0.41	0.57	0.56	0.76	0.9	0.22	0.41	0.58	0.89	0.71	0.74	0.16	0.36	0.24	0.74	0.4	0.42	0.36	0.33
chr2	4898340	0.46	0.52	1.0	1.0	1.0	1.0	1.0	0.48	1.0	0.67	0.73	1.0	1.0	1.0	1.0	1.0	0.42	1.0	1.0	1.0	1.0	0.78	1.0	1.0	1.0	0.56	0.43	0.55	0.67	0.74	0.62	0.41	1.0	1.0	0.63	0.52	0.75	1.0	1.0	0.85	0.39	0.71	0.62	1.0	0.54	0.39	0.48	0.52
chr2	4917409	0.48	0.48	1.0	1.0	1.0	1.0	1.0	0.52	1.0	0.57	0.65	1.0	1.0	1.0	1.0	1.0	0.59	1.0	1.0	1.0	1.0	0.88	0.94	1.0	0.97	0.55	0.59	0.61	0.56	0.69	0.68	0.6	0.9	1.0	0.67	0.68	0.84	1.0	0.93	0.89	0.48	0.57	0.62	1.0	0.62	0.59	0.58	0.51
chr2	4947879	0.47	0.65	0.15	0.18	0.0	0.0	0.09	0.33	0.09	0.41	0.44	0.0	0.18	0.06	0.08	0.03	0.47	0.0	0.0	0.0	0.21	0.26	0.12	0.07	0.03	0.58	0.5	0.33	0.36	0.41	0.5	0.55	0.29	0.11	0.48	0.46	0.52	0.03	0.15	0.23	0.57	0.4	0.73	0.18	0.58	0.41	0.54	0.53
chr2	4962551	0.26	0.13	0.71	0.7	0.68	0.77	0.83	0.2	0.78	0.32	0.31	0.57	0.63	0.58	0.5	0.64	0.23	0.76	0.79	0.64	0.77	0.64	0.74	0.38	0.6	0.25	0.3	0.2	0.19	0.26	0.13	0.22	0.71	0.8	0.21	0.31	0.33	0.67	0.48	0.72	0.12	0.2	0.18	0.62	0.14	0.2	0.17	0.17
chr2	4978001	0.51	0.52	1.0	1.0	1.0	1.0	1.0	0.5	1.0	0.75	0.54	1.0	1.0	1.0	1.0	1.0	0.55	1.0	0.97	1.0	1.0	0.86	1.0	1.0	1.0	0.58	0.55	0.43	0.71	0.62	0.54	0.46	0.9	1.0	0.42	0.58	0.72	1.0	1.0	1.0	0.59	0.58	0.41	1.0	0.47	0.41	0.54	0.57
chr2	4992487	0.25	0.32	0.79	0.81	0.61	0.75	0.86	0.27	0.72	0.58	0.24	0.91	0.66	0.67	0.73	0.91	0.37	0.74	0.86	0.66	0.87	0.71	0.77	0.77	0.89	0.28	0.28	0.4	0.33	0.68	0.5	0.31	0.91	0.73	0.43	0.45	0.73	0.84	0.55	0.89	0.35	0.32	0.3	0.72	0.42	0.32	0.26	0.37
chr2	5022458	0.43	0.63	1.0	1.0	1.0	1.0	1.0	0.42	1.0	0.73	0.73	1.0	1.0	1.0	1.0	1.0	0.68	1.0	1.0	0.94	1.0	0.66	1.0	1.0	1.0	0.57	0.52	0.5	0.5	0.56	0.64	0.57	0.97	1.0	0.56	0.49	0.65	1.0	1.0	0.98	0.7	0.44	0.46	1.0	0.63	0.66	0.6	0.46
chr2	5149254	0.9	0.92	0.59	0.28	0.53	0.75	0.4	0.78	0.39	0.81	0.97	0.48	0.27	0.37	0.55	0.58	0.86	0.67	0.5	0.46	0.64	0.57	0.33	0.33	0.57	0.89	0.84	0.85	0.77	0.93	0.91	0.84	0.59	0.5	0.88	0.73	0.62	0.33	0.61	0.56	0.89	0.97	0.92	0.48	0.88	0.84	0.87	0.89
chr2	5166843	1.0	1.0	0.47	0.14	0.27	0.27	0.36	0.97	0.59	0.64	0.95	0.19	0.32	0.21	0.41	0.32	0.96	0.33	0.36	0.41	0.36	0.44	0.45	0.35	0.17	0.87	0.96	0.95	1.0	0.69	0.68	0.97	0.45	0.46	0.84	0.77	0.41	0.14	0.38	0.32	0.96	0.94	0.97	0.5	0.98	1.0	0.93	0.93
chr2	5280407	0.45	0.26	0.76	0.85	0.79	0.88	0.77	0.41	0.71	0.41	0.3	0.59	0.79	0.83	0.82	0.79	0.28	0.88	0.88	0.86	0.9	0.78	0.76	0.97	0.87	0.34	0.25	0.33	0.26	0.57	0.25	0.32	0.83	0.83	0.39	0.45	0.48	0.93	0.8	0.68	0.57	0.32	0.44	0.72	0.45	0.21	0.26	0.42
chr2	9080626	0.38	0.88	0.63	0.76	0.73	0.83	0.79	0.73	0.82	0.5	0.2	0.88	0.81	0.68	0.83	1.0	0.57	0.65	0.94	0.96	0.87	0.73	0.94	0.83	0.88	0.61	0.32	0.22	0.91	0.64	0.56	0.63	0.67	0.91	0.32	0.84	0.71	0.92	0.8	0.89	0.64	0.3	0.29	0.86	0.39	0.56	0.46	0.17
chr2	9379871	0.44	0.25	0.74	0.74	0.7	0.72	0.93	0.29	0.64	0.33	0.44	0.69	0.54	0.86	0.75	0.66	0.3	0.6	0.73	0.48	0.7	0.62	0.69	0.82	0.67	0.34	0.38	0.24	0.09	0.22	0.29	0.25	0.84	0.62	0.44	0.23	0.4	0.62	0.54	0.73	0.32	0.44	0.33	0.73	0.47	0.48	0.35	0.33
chr2	10205706	0.45	0.38	0.85	0.82	0.81	0.78	0.87	0.72	0.77	0.83	0.92	0.87	0.78	0.93	0.91	0.83	0.14	0.73	0.95	0.86	0.96	0.76	1.0	0.93	0.8	0.15	0.67	0.7	0.45	0.81	0.67	0.71	0.94	0.68	0.86	0.7	1.0	0.93	0.72	0.89	0.68	0.48	0.58	0.95	0.48	0.41	0.73	0.53
chr2	15811140	0.77	0.81	0.32	0.28	0.18	0.35	0.16	0.94	1.0	0.81	0.9	0.3	0.86	0.89	0.95	0.74	0.85	0.68	0.73	0.79	0.94	0.97	0.79	0.97	0.88	0.9	0.95	0.82	0.81	0.97	1.0	1.0	1.0	0.05	1.0	1.0	0.96	0.87	0.92	0.91	1.0	0.92	0.93	0.21	0.72	0.81	0.88	0.68
chr2	23636674	0.23	0.14	0.66	0.69	0.79	0.48	0.62	0.0	0.62	0.39	0.33	0.65	0.7	0.69	0.75	0.65	0.25	0.6	0.52	0.6	0.8	0.5	0.73	0.19	0.32	0.13	0.31	0.2	0.52	0.43	0.25	0.41	0.57	0.78	0.44	0.41	0.4	0.5	0.47	0.26	0.27	0.24	0.25	0.64	0.33	0.32	0.21	0.14
chr2	24917346	0.17	0.0	0.92	0.86	0.48	0.61	0.61	0.36	0.56	0.52	0.55	0.26	0.62	0.47	0.56	0.5	0.04	0.31	0.59	0.55	0.21	0.47	0.26	0.19	0.16	0.14	0.53	0.36	0.71	0.83	0.92	0.71	0.28	0.96	0.53	0.85	0.36	0.71	0.37	0.26	0.21	0.24	0.12	0.15	0.29	0.18	0.3	0.5
chr2	27492155	0.27	0.2	0.83	0.74	0.69	0.73	0.86	0.08	0.68	0.42	0.29	0.72	0.62	0.71	0.81	0.77	0.38	0.62	0.55	0.71	0.67	0.56	0.62	0.5	0.6	0.28	0.27	0.34	0.2	0.26	0.3	0.33	0.49	0.83	0.34	0.37	0.65	0.71	0.69	0.51	0.24	0.43	0.19	0.74	0.1	0.14	0.19	0.33
chr3	2438981	0.59	0.52	0.21	0.44	0.42	0.45	0.34	0.68	0.22	0.18	0.24	0.21	0.15	0.19	0.22	0.0	0.2	0.25	0.11	0.17	0.3	0.2	0.15	0.25	0.22	0.23	0.2	0.11	0.12	0.14	0.06	0.16	0.19	0.1	0.47	0.67	0.41	0.61	0.61	0.58	0.77	0.6	0.75	0.57	0.69	0.56	0.76	0.68
chr3	9571741	0.68	0.54	0.94	0.93	0.77	0.92	0.77	0.47	0.83	0.25	0.77	0.86	1.0	0.94	0.95	0.84	0.77	1.0	0.94	0.84	0.96	0.65	0.96	0.94	0.9	0.64	0.55	0.58	0.41	0.34	0.41	0.44	0.68	1.0	0.63	0.66	0.63	0.92	0.77	0.5	0.46	0.83	0.87	0.91	0.51	0.72	0.57	0.61
chr3	13024175	0.79	0.9	0.47	0.53	0.33	0.58	0.41	0.91	0.44	0.64	0.44	0.38	0.19	0.28	0.27	0.19	0.48	0.26	0.38	0.36	0.37	0.45	0.28	0.32	0.31	0.49	0.6	0.65	0.56	0.56	0.68	0.62	0.39	0.61	0.92	0.96	0.67	0.67	0.62	0.44	0.77	0.76	0.82	0.76	0.77	0.53	0.65	0.79
chr3	16918974	1.0	1.0	0.98	0.79	1.0	1.0	1.0	1.0	0.81	0.28	1.0	0.63	0.76	0.39	0.73	0.59	0.71	1.0	1.0	1.0	0.67	1.0	0.26	0.96	0.93	0.97	0.97	0.97	0.96	0.96	1.0	1.0	0.17	1.0	1.0	1.0	0.81	1.0	0.9	0.83	1.0	0.93	0.96	0.78	1.0	1.0	1.0	1.0
chr3	31917707	0.75	0.61	1.0	1.0	1.0	0.94	1.0	0.62	1.0	0.84	1.0	1.0	1.0	1.0	1.0	1.0	0.5	1.0	1.0	1.0	1.0	1.0	0.97	1.0	1.0	0.47	0.9	0.93	0.95	0.97	0.88	0.69	0.97	1.0	0.97	0.8	0.87	1.0	0.92	1.0	0.56	0.39	0.59	1.0	0.43	0.32	0.65	0.95
chr4	2761352	0.18	0.47	0.86	0.9	0.6	0.83	0.77	0.44	0.77	0.21	0.43	0.68	0.88	0.79	0.93	0.8	0.34	0.8	0.81	0.74	0.67	0.39	0.58	0.7	0.78	0.33	0.55	0.48	0.19	0.16	0.05	0.16	0.61	0.88	0.62	0.25	0.61	0.84	0.46	0.42	0.39	0.45	0.45	0.73	0.46	0.32	0.62	0.38
chr4	10950619	0.39	0.56	0.95	1.0	1.0	1.0	0.97	0.4	0.92	0.93	1.0	0.88	0.79	0.97	1.0	1.0	0.44	1.0	0.97	0.93	0.67	0.89	1.0	0.97	0.94	0.52	0.83	0.76	1.0	1.0	0.92	0.84	0.78	0.65	0.97	0.84	0.96	1.0	0.89	0.93	0.44	0.44	0.26	0.94	0.37	0.52	0.39	0.92
chr4	10975129	0.52	0.56	1.0	1.0	1.0	1.0	1.0	0.62	1.0	1.0	1.0	1.0	1.0	1.0	1.0	1.0	0.67	1.0	1.0	1.0	1.0	1.0	1.0	1.0	1.0	0.47	0.87	0.84	1.0	1.0	1.0	0.95	1.0	1.0	0.97	0.92	1.0	1.0	1.0	1.0	0.7	0.48	0.42	1.0	0.51	0.44	0.51	1.0
chr4	10990835	0.41	0.54	1.0	1.0	1.0	1.0	1.0	0.44	1.0	1.0	1.0	1.0	1.0	1.0	1.0	1.0	0.53	1.0	1.0	1.0	1.0	1.0	1.0	1.0	1.0	0.42	0.83	0.7	1.0	1.0	1.0	0.85	1.0	1.0	0.9	0.88	1.0	1.0	1.0	1.0	0.63	0.45	0.44	1.0	0.68	0.54	0.63	0.91
chr4	11002426	0.64	0.61	1.0	1.0	0.9	1.0	1.0	0.54	1.0	1.0	1.0	1.0	1.0	1.0	1.0	1.0	0.54	0.97	1.0	1.0	1.0	1.0	1.0	1.0	1.0	0.43	0.83	0.81	1.0	1.0	0.95	0.93	1.0	1.0	0.97	0.9	1.0	1.0	1.0	1.0	0.55	0.43	0.32	1.0	0.55	0.24	0.5	0.93
chr4	11113611	0.21	0.42	1.0	1.0	1.0	1.0	1.0	0.27	1.0	1.0	1.0	1.0	1.0	1.0	1.0	1.0	0.42	1.0	1.0	1.0	1.0	1.0	1.0	1.0	1.0	0.27	0.8	0.76	1.0	1.0	0.95	1.0	1.0	1.0	0.9	0.63	1.0	1.0	1.0	1.0	0.46	0.25	0.23	1.0	0.31	0.23	0.21	0.81
chr4	11135063	0.97	0.86	0.54	0.38	0.42	0.56	0.53	0.87	0.44	0.5	0.5	0.45	0.4	0.47	0.48	0.4	0.88	0.42	0.5	0.35	0.65	0.36	0.48	0.48	0.56	0.85	0.66	0.82	0.38	0.43	0.32	0.55	0.5	0.09	0.58	0.45	0.39	0.61	0.44	0.31	0.78	1.0	1.0	0.38	0.93	0.82	1.0	0.58
chr4	11146651	0.24	0.12	0.92	0.91	0.83	0.75	0.87	0.08	0.75	0.96	0.88	0.79	0.96	0.75	0.88	0.77	0.15	0.83	0.81	0.93	0.84	0.92	0.92	0.96	0.98	0.11	0.62	0.58	0.9	1.0	0.96	0.84	0.94	1.0	0.79	0.77	0.96	0.82	0.91	0.9	0.34	0.11	0.25	0.87	0.12	0.11	0.26	0.79
chr4	11163301	0.9	0.92	0.45	0.54	0.53	0.33	0.45	0.93	0.39	0.38	0.47	0.52	0.33	0.33	0.44	0.56	0.87	0.29	0.5	0.26	0.62	0.37	0.33	0.28	0.28	0.85	0.51	0.61	0.26	0.5	0.44	0.37	0.22	0.65	0.45	0.52	0.36	0.46	0.45	0.42	0.65	0.87	1.0	0.42	0.86	0.88	0.89	0.61
chr4	11200675	0.05	0.14	1.0	1.0	1.0	1.0	1.0	0.05	1.0	1.0	1.0	1.0	1.0	0.97	1.0	1.0	0.17	1.0	1.0	1.0	1.0	0.97	1.0	1.0	1.0	0.19	0.68	0.69	1.0	1.0	0.77	0.94	1.0	1.0	0.9	0.82	1.0	0.95	1.0	1.0	0.33	0.12	0.13	1.0	0.33	0.21	0.15	0.76
chr4	11246100	0.21	0.09	0.81	0.75	0.79	0.88	0.66	0.16	0.82	0.86	0.75	0.84	0.82	0.6	0.92	0.84	0.37	0.81	0.84	0.85	0.74	0.78	0.75	0.67	0.77	0.29	0.55	0.6	0.76	0.71	0.68	0.76	0.68	0.74	0.73	0.54	0.93	0.85	0.64	0.78	0.55	0.4	0.44	0.88	0.37	0.39	0.35	0.73
chr4	11353709	0.28	0.33	0.86	0.92	0.96	0.89	0.97	0.32	0.96	0.9	0.92	0.97	0.94	0.87	0.86	0.9	0.37	0.89	0.91	0.91	1.0	0.86	0.87	1.0	0.92	0.32	0.78	0.67	0.83	1.0	0.82	0.94	1.0	0.97	0.85	0.92	0.87	0.91	0.95	0.89	0.34	0.33	0.14	0.88	0.46	0.42	0.21	0.77
chr4	11449846	0.34	0.34	1.0	1.0	1.0	1.0	1.0	0.35	0.97	1.0	0.97	1.0	1.0	1.0	1.0	1.0	0.34	1.0	1.0	1.0	1.0	1.0	1.0	1.0	1.0	0.23	0.83	0.84	1.0	1.0	0.9	0.97	1.0	1.0	0.97	0.86	1.0	1.0	1.0	1.0	0.34	0.42	0.26	1.0	0.39	0.57	0.35	0.72
chr4	11516834	0.41	0.33	0.94	0.83	0.82	0.8	0.91	0.24	0.93	0.77	0.9	0.7	1.0	0.88	1.0	0.9	0.21	0.83	0.89	0.87	0.96	0.81	0.88	0.81	0.92	0.19	0.65	0.7	0.7	0.68	0.61	0.68	0.7	0.68	0.86	0.85	0.59	0.88	0.73	0.89	0.64	0.27	0.22	0.82	0.24	0.26	0.22	0.81
chr4	11592876	0.73	0.83	0.23	0.35	0.33	0.24	0.31	0.7	0.14	0.45	0.52	0.5	0.25	0.21	0.19	0.39	0.82	0.33	0.26	0.38	0.18	0.58	0.26	0.26	0.27	0.77	0.52	0.51	0.75	0.34	0.69	0.36	0.22	0.24	0.51	0.21	0.6	0.29	0.58	0.43	0.75	0.83	0.86	0.27	0.73	0.79	0.79	0.39
chr4	11624653	0.38	0.38	1.0	1.0	1.0	1.0	1.0	0.37	1.0	1.0	1.0	1.0	1.0	1.0	1.0	1.0	0.35	1.0	1.0	1.0	1.0	1.0	1.0	1.0	1.0	0.3	0.82	0.73	1.0	1.0	0.91	0.93	1.0	1.0	0.84	0.96	1.0	1.0	1.0	1.0	0.55	0.47	0.39	1.0	0.35	0.61	0.34	0.88
chr4	11653666	0.85	0.88	0.39	0.52	0.38	0.47	0.48	0.96	0.33	0.3	0.48	0.53	0.23	0.32	0.34	0.23	0.86	0.31	0.43	0.37	0.62	0.47	0.37	0.55	0.53	0.83	0.56	0.51	0.36	0.34	0.27	0.41	0.37	0.42	0.56	0.76	0.2	0.26	0.35	0.26	0.8	0.83	0.88	0.46	0.71	0.79	0.69	0.53
chr4	11664504	0.4	0.52	1.0	1.0	1.0	1.0	1.0	0.33	1.0	1.0	1.0	1.0	1.0	1.0	1.0	1.0	0.42	1.0	1.0	1.0	1.0	1.0	1.0	1.0	1.0	0.2	0.76	0.75	1.0	1.0	0.95	0.97	1.0	1.0	1.0	0.93	1.0	1.0	1.0	1.0	0.57	0.54	0.5	1.0	0.55	0.5	0.53	0.81
chr4	11704134	0.33	0.38	0.71	0.62	0.82	0.73	0.78	0.34	0.78	0.89	0.69	0.81	0.74	0.81	0.71	0.76	0.32	0.91	0.85	0.87	0.72	0.78	0.68	0.79	0.71	0.12	0.7	0.53	0.95	0.92	0.9	0.74	0.93	0.61	0.76	0.8	1.0	0.83	0.88	0.81	0.46	0.43	0.33	0.84	0.49	0.36	0.28	0.64
chr4	11765025	0.56	0.47	0.96	0.95	0.8	1.0	0.92	0.55	1.0	0.9	0.81	1.0	1.0	0.97	0.89	0.87	0.42	1.0	1.0	0.92	1.0	1.0	0.92	1.0	1.0	0.43	0.84	0.87	0.88	0.92	0.92	0.9	1.0	0.86	0.96	0.92	1.0	0.86	0.97	1.0	0.52	0.54	0.45	0.97	0.53	0.38	0.43	0.67
chr4	22175951	0.47	0.54	0.95	0.97	1.0	1.0	1.0	0.62	1.0	0.35	0.77	0.97	1.0	0.97	1.0	1.0	0.56	1.0	1.0	0.97	0.93	0.48	0.81	0.84	0.81	0.65	0.75	0.67	0.55	0.41	0.38	0.51	0.64	1.0	0.69	0.81	0.68	0.97	0.79	0.73	0.51	0.52	0.56	1.0	0.61	0.61	0.54	0.79
chr4	22194062	0.57	0.52	0.91	0.96	1.0	0.94	0.93	0.52	1.0	0.52	0.79	0.68	1.0	0.74	1.0	0.81	0.55	1.0	0.91	1.0	0.93	0.4	0.79	0.85	0.75	0.55	0.64	0.62	0.29	0.3	0.27	0.47	0.53	0.95	0.79	0.37	0.38	0.94	0.64	0.7	0.59	0.82	0.33	0.94	0.58	0.67	0.73	0.68
chr4	22233531	0.56	0.49	0.97	0.91	0.88	1.0	0.92	0.68	0.94	0.6	0.52	0.86	1.0	0.86	0.96	0.97	0.55	0.95	0.93	0.97	0.92	0.62	0.75	0.88	0.68	0.46	0.79	0.67	0.22	0.26	0.63	0.39	0.75	1.0	0.78	0.57	0.39	0.98	0.81	0.69	0.52	0.55	0.57	1.0	0.58	0.72	0.84	0.81
chr4	22256064	0.57	0.61	0.97	0.96	1.0	1.0	0.96	0.54	1.0	0.65	0.86	1.0	1.0	1.0	1.0	1.0	0.57	1.0	1.0	1.0	0.93	0.75	0.92	0.86	0.92	0.54	0.74	0.69	0.48	0.28	0.43	0.53	0.69	1.0	0.78	0.37	0.61	1.0	0.79	0.88	0.68	0.59	0.69	1.0	0.71	0.56	0.56	0.81
chr4	22272210	0.63	0.56	0.92	1.0	1.0	1.0	0.97	0.71	0.97	0.44	0.67	0.94	1.0	1.0	1.0	1.0	0.58	1.0	1.0	1.0	1.0	0.74	0.79	1.0	0.9	0.52	0.65	0.7	0.36	0.48	0.38	0.37	0.85	1.0	0.72	0.63	0.56	0.97	0.68	0.84	0.45	0.39	0.55	1.0	0.56	0.69	0.67	0.97
chr4	22284704	0.52	0.5	0.97	1.0	1.0	1.0	1.0	0.57	1.0	0.45	0.72	1.0	0.96	0.93	1.0	1.0	0.45	1.0	1.0	1.0	1.0	0.52	0.58	0.8	0.74	0.51	0.77	0.78	0.41	0.41	0.38	0.46	0.76	1.0	0.73	0.45	0.58	0.97	0.58	0.52	0.5	0.6	0.38	1.0	0.37	0.61	0.46	0.69
chr4	22298067	0.58	0.64	1.0	0.97	1.0	1.0	1.0	0.55	1.0	0.42	0.68	1.0	0.92	0.97	1.0	0.97	0.5	0.97	1.0	1.0	1.0	0.51	0.85	0.87	0.83	0.63	0.74	0.69	0.41	0.48	0.39	0.45	0.67	0.96	0.67	0.42	0.75	0.97	0.57	0.9	0.69	0.57	0.61	1.0	0.64	0.47	0.59	0.79
chr4	22309113	0.65	0.51	0.92	0.94	1.0	1.0	1.0	0.63	1.0	0.57	0.55	1.0	0.97	1.0	1.0	0.96	0.57	1.0	1.0	1.0	1.0	0.43	0.75	0.88	0.89	0.68	0.77	0.71	0.35	0.47	0.5	0.44	0.74	1.0	0.73	0.48	0.5	0.97	0.7	0.78	0.75	0.6	0.48	1.0	0.5	0.55	0.63	0.86
chr4	22382157	0.3	0.39	0.03	0.0	0.0	0.0	0.0	0.44	0.0	0.47	0.29	0.0	0.04	0.0	0.0	0.0	0.38	0.0	0.0	0.0	0.18	0.54	0.04	0.23	0.12	0.35	0.16	0.27	0.62	0.52	0.84	0.63	0.14	0.33	0.15	0.5	0.44	0.05	0.56	0.26	0.3	0.39	0.3	0.0	0.37	0.43	0.08	0.12
chr4	22395631	0.31	0.45	0.1	0.14	0.15	0.08	0.16	0.42	0.09	0.48	0.19	0.19	0.1	0.03	0.12	0.03	0.38	0.03	0.0	0.09	0.0	0.56	0.24	0.14	0.26	0.5	0.3	0.42	0.53	0.5	0.8	0.62	0.45	0.2	0.16	0.68	0.57	0.18	0.32	0.31	0.47	0.35	0.43	0.11	0.42	0.51	0.55	0.22
chr4	22420398	0.42	0.56	0.08	0.15	0.21	0.09	0.3	0.44	0.03	0.44	0.29	0.07	0.13	0.07	0.08	0.03	0.38	0.12	0.03	0.09	0.0	0.42	0.33	0.17	0.13	0.48	0.36	0.37	0.74	0.5	0.73	0.54	0.21	0.22	0.08	0.49	0.78	0.05	0.29	0.34	0.34	0.49	0.38	0.13	0.37	0.58	0.34	0.29
chr4	22433873	0.34	0.44	0.03	0.0	0.0	0.0	0.0	0.42	0.04	0.38	0.35	0.0	0.04	0.03	0.0	0.0	0.4	0.0	0.0	0.0	0.0	0.53	0.27	0.07	0.06	0.36	0.2	0.21	0.57	0.5	0.83	0.51	0.23	0.25	0.21	0.51	0.69	0.0	0.24	0.27	0.27	0.38	0.32	0.0	0.33	0.37	0.37	0.08
chr4	22631298	0.73	0.58	0.65	0.7	0.9	0.71	0.9	0.62	0.81	0.44	0.57	0.84	0.87	0.84	0.79	0.84	0.49	0.74	0.81	0.87	0.79	0.41	0.79	0.74	0.85	0.41	0.6	0.56	0.18	0.37	0.16	0.28	0.56	0.74	0.65	0.38	0.35	0.71	0.76	0.76	0.58	0.46	0.5	0.88	0.56	0.38	0.5	0.53
chr4	22893252	0.77	0.67	0.98	1.0	0.9	1.0	1.0	0.67	0.9	0.5	0.91	1.0	0.96	0.88	1.0	0.93	0.65	1.0	0.96	0.96	0.96	0.44	0.97	1.0	1.0	0.74	0.74	0.86	0.42	0.53	0.19	0.47	0.74	0.96	0.85	0.5	0.4	0.88	0.85	0.84	0.64	0.62	0.77	0.94	0.77	0.74	0.73	0.94
chr5	3854701	0.26	0.65	0.44	0.33	0.76	0.76	0.81	0.42	0.29	0.42	0.24	0.27	0.38	0.19	0.24	0.15	0.28	0.31	0.27	0.31	0.08	0.61	0.08	0.04	0.07	0.17	0.12	0.28	0.82	0.69	0.33	0.34	0.62	0.13	0.29	0.46	0.5	0.49	0.29	0.39	0.54	0.48	0.64	0.67	0.52	0.55	0.4	0.19
chr5	4173416	0.43	0.48	1.0	1.0	1.0	1.0	1.0	0.54	0.81	0.86	0.78	1.0	0.9	0.89	0.85	0.79	0.46	1.0	0.92	0.79	0.91	0.93	0.91	0.86	0.86	0.37	0.64	0.78	0.77	0.74	0.73	0.62	0.94	1.0	0.74	0.68	0.75	0.94	0.91	0.8	0.49	0.57	0.41	1.0	0.42	0.47	0.47	0.82
chr5	12161674	0.7	0.84	0.33	0.27	0.39	0.33	0.32	0.45	0.14	0.27	0.42	0.19	0.32	0.2	0.15	0.08	0.19	0.29	0.12	0.2	0.19	0.44	0.27	0.3	0.14	0.36	0.36	0.57	0.67	0.59	0.6	0.56	0.54	0.41	0.69	0.63	0.25	0.59	0.67	0.7	0.73	0.67	0.75	0.73	0.53	0.77	0.74	0.77
chr5	12819645	0.59	0.66	0.96	0.96	1.0	1.0	1.0	0.31	1.0	0.88	0.93	1.0	1.0	1.0	1.0	1.0	0.26	1.0	0.97	1.0	1.0	0.9	1.0	1.0	1.0	0.31	0.71	0.78	0.76	0.86	0.67	0.53	0.88	0.78	0.94	0.61	1.0	1.0	0.9	0.81	0.54	0.6	0.53	1.0	0.62	0.41	0.56	0.96
chr5	12877405	0.47	0.35	0.88	0.85	0.82	0.87	0.86	0.29	0.93	0.74	0.67	0.88	1.0	0.88	0.8	0.81	0.09	0.92	0.93	0.96	1.0	0.8	0.91	0.89	0.83	0.13	0.58	0.63	0.66	0.74	0.52	0.63	0.81	0.9	0.84	0.58	0.76	0.79	0.78	0.9	0.32	0.38	0.44	0.81	0.49	0.36	0.41	0.75
chr5	12904442	0.48	0.62	0.92	0.84	0.88	0.94	0.71	0.26	0.83	0.65	0.6	0.9	0.86	0.89	0.86	1.0	0.26	1.0	0.91	0.78	1.0	0.8	0.78	0.81	0.81	0.31	0.7	0.71	0.69	0.74	0.48	0.69	0.9	0.74	0.86	0.74	0.71	0.69	0.75	0.92	0.48	0.5	0.33	1.0	0.58	0.52	0.47	0.77
chr5	13106292	0.33	0.34	0.94	0.9	0.93	1.0	0.76	0.32	0.83	0.48	0.7	0.78	0.67	0.78	0.82	0.89	0.29	0.81	0.8	0.86	0.92	0.81	0.84	0.87	0.91	0.43	0.64	0.55	0.67	0.56	0.6	0.53	0.86	0.86	0.71	0.67	0.5	0.81	0.88	0.83	0.65	0.32	0.32	0.85	0.5	0.48	0.56	0.77
chr5	13959149	0.7	0.69	0.37	0.26	0.5	0.32	0.33	0.76	0.41	0.76	0.23	0.21	0.24	0.42	0.52	0.29	0.85	0.22	0.32	0.22	0.19	0.52	0.58	0.64	0.47	0.84	0.33	0.5	0.81	0.86	0.52	0.76	0.68	0.23	0.45	0.74	0.75	0.39	0.63	0.44	0.7	0.68	0.75	0.38	0.79	0.79	0.65	0.42
chr6	6922159	1.0	1.0	0.91	1.0	0.94	0.86	0.94	1.0	0.25	0.75	0.85	0.17	0.59	0.52	0.52	0.32	0.93	0.14	0.62	0.7	0.06	0.81	0.27	0.21	0.14	0.89	0.95	0.98	0.89	0.92	0.84	0.97	0.41	1.0	0.9	0.63	0.83	0.84	0.32	0.49	0.97	1.0	1.0	0.29	0.84	0.82	0.96	0.89
chr6	10395085	0.85	1.0	0.52	0.72	0.48	0.52	0.57	0.96	0.42	0.3	0.53	0.35	0.37	0.36	0.36	0.38	0.54	0.4	0.41	0.43	0.48	0.4	0.43	0.31	0.38	0.39	0.56	0.5	0.45	0.47	0.31	0.31	0.34	0.42	0.94	0.81	0.43	0.96	1.0	0.79	0.72	0.78	0.87	0.57	0.7	0.94	1.0	0.65
chr6	11097837	0.95	0.72	0.45	0.52	0.73	0.62	0.48	0.9	0.35	0.22	0.5	0.45	0.27	0.48	0.17	0.45	0.52	0.48	0.32	0.24	0.17	0.31	0.57	0.5	0.52	0.45	0.47	0.47	0.63	0.5	0.44	0.7	0.43	0.27	0.84	0.85	0.58	0.82	0.75	0.84	0.84	0.93	0.84	0.81	0.79	0.81	0.93	0.95
chr6	12117886	0.85	0.75	0.31	0.18	0.53	0.18	0.41	0.81	0.57	0.46	0.59	0.45	0.57	0.62	0.64	0.52	0.74	0.45	0.5	0.8	0.5	0.55	0.33	0.08	0.09	0.66	0.58	0.72	0.43	0.59	0.44	0.5	0.26	0.35	0.58	0.61	0.65	0.57	0.41	0.54	0.94	0.94	0.76	0.42	0.79	0.8	0.76	0.62
chr6	14142167	0.72	0.73	0.23	0.1	0.19	0.28	0.31	0.73	0.41	0.84	0.62	0.25	0.4	0.21	0.12	0.21	0.82	0.26	0.5	0.19	0.48	0.67	0.56	0.76	0.92	0.69	0.52	0.4	0.81	0.72	0.67	0.82	0.62	0.18	0.39	0.71	0.64	0.33	0.5	0.61	0.58	0.54	0.75	0.32	0.67	0.77	0.58	0.38
chr6	16355674	0.3	0.33	0.4	0.37	0.32	0.33	0.27	0.42	0.0	0.56	0.25	0.12	0.32	0.13	0.05	0.05	0.27	0.2	0.26	0.4	0.14	0.53	0.0	0.0	0.0	0.3	0.17	0.21	0.83	0.79	0.64	0.62	0.55	0.65	0.21	0.44	0.68	0.09	0.15	0.26	0.41	0.4	0.5	0.04	0.17	0.2	0.39	0.39
chr6	19282757	0.26	0.19	0.39	0.52	0.41	0.6	0.27	0.24	0.57	0.83	0.2	0.33	0.67	0.51	0.55	0.52	0.13	0.5	0.42	0.6	0.13	0.67	0.64	0.93	0.61	0.21	0.23	0.15	0.33	0.55	0.43	0.49	0.6	0.25	0.37	0.56	0.54	0.22	0.78	0.68	0.11	0.25	0.24	0.28	0.22	0.16	0.09	0.34
chr6	21864877	0.87	0.96	0.51	0.7	0.53	0.43	0.65	0.97	0.48	0.92	0.71	0.78	0.26	0.31	0.25	0.22	0.91	0.5	0.26	0.33	0.42	0.79	0.69	0.82	0.7	0.96	0.88	0.6	0.96	0.97	1.0	0.94	0.71	0.67	0.48	0.85	0.88	0.22	0.91	0.86	1.0	1.0	0.96	0.72	0.78	0.97	0.85	0.72
chr6	22218853	0.64	0.77	0.9	0.93	0.94	0.84	0.94	0.65	0.12	0.76	0.81	0.65	0.58	0.21	0.15	0.16	0.65	0.38	0.38	0.25	0.67	0.63	0.81	0.96	0.94	0.77	0.89	0.63	0.66	0.58	0.7	0.56	0.55	0.84	0.73	0.82	0.58	0.37	0.72	0.77	0.7	0.68	0.67	0.8	0.78	0.73	0.59	0.67
chr6	22237106	0.69	0.79	0.54	0.5	0.8	0.64	0.71	0.64	0.03	0.68	0.86	0.72	0.44	0.1	0.07	0.03	0.78	0.45	0.15	0.23	0.15	0.5	0.56	0.68	0.62	0.76	0.76	0.67	0.68	0.68	0.45	0.57	0.33	0.69	0.6	0.83	0.61	0.14	0.47	0.5	0.83	0.93	0.81	0.86	0.66	0.7	0.73	0.78
chr6	22286672	1.0	1.0	1.0	0.96	1.0	1.0	1.0	1.0	0.0	1.0	1.0	1.0	0.73	0.0	0.17	0.15	0.96	0.62	0.27	0.5	0.46	0.91	0.57	0.59	0.5	1.0	0.98	1.0	1.0	1.0	1.0	1.0	0.8	1.0	0.97	0.96	0.81	0.22	0.81	0.93	0.97	1.0	1.0	1.0	1.0	1.0	0.97	1.0
chr6	22336811	1.0	1.0	0.97	0.93	1.0	0.95	1.0	1.0	0.3	1.0	1.0	1.0	0.94	0.22	0.25	0.46	1.0	0.69	0.53	0.63	0.5	0.91	0.97	0.88	0.89	1.0	1.0	1.0	1.0	1.0	1.0	1.0	0.9	1.0	1.0	1.0	0.88	0.51	0.98	0.94	1.0	1.0	1.0	1.0	1.0	1.0	1.0	1.0
chr6	22618874	1.0	1.0	0.97	1.0	1.0	1.0	1.0	1.0	0.43	1.0	1.0	0.96	0.86	0.32	0.18	0.26	1.0	0.56	0.56	0.62	0.78	0.83	1.0	1.0	0.76	1.0	1.0	1.0	1.0	1.0	1.0	1.0	0.96	1.0	1.0	1.0	1.0	0.45	1.0	1.0	0.97	1.0	1.0	1.0	1.0	1.0	1.0	1.0
chr6	22648471	1.0	1.0	1.0	0.96	1.0	1.0	1.0	1.0	0.13	1.0	1.0	1.0	0.86	0.41	0.55	0.59	1.0	0.61	0.41	0.59	0.69	0.93	0.88	1.0	0.97	1.0	1.0	1.0	1.0	1.0	1.0	1.0	0.84	1.0	1.0	1.0	1.0	0.44	0.94	1.0	1.0	1.0	1.0	1.0	1.0	1.0	1.0	1.0
chr6	22860018	0.91	0.97	0.97	0.91	1.0	1.0	0.91	0.84	0.25	0.89	0.86	0.9	0.73	0.14	0.37	0.38	0.9	0.67	0.22	0.67	0.4	0.94	0.8	0.73	0.77	0.98	0.91	0.97	0.88	1.0	0.94	1.0	0.78	0.89	0.75	0.97	0.92	0.35	0.89	0.82	0.95	0.92	1.0	0.95	0.98	0.96	0.98	1.0
chr6	22958353	0.94	0.94	0.91	0.79	0.88	0.76	0.87	0.93	0.1	1.0	0.95	0.88	0.79	0.03	0.14	0.17	0.94	0.46	0.24	0.44	0.45	0.78	0.62	0.48	0.57	0.93	0.88	0.96	1.0	1.0	1.0	0.97	0.64	0.94	0.82	0.83	0.82	0.29	0.81	0.72	0.93	0.97	0.93	0.78	0.94	0.83	0.88	0.97
chr6	23132581	1.0	1.0	1.0	0.97	1.0	1.0	1.0	1.0	0.1	1.0	1.0	1.0	0.83	0.08	0.25	0.41	1.0	0.67	0.41	0.71	0.52	0.92	0.97	0.78	0.91	1.0	1.0	1.0	1.0	0.94	1.0	1.0	0.87	1.0	1.0	0.95	1.0	0.58	0.86	1.0	0.97	1.0	1.0	1.0	1.0	1.0	1.0	1.0
chr6	23199051	0.93	0.94	0.97	0.92	0.93	1.0	1.0	1.0	0.12	0.96	0.78	0.97	0.72	0.14	0.08	0.15	0.87	0.73	0.31	0.4	0.36	0.75	0.88	0.81	0.96	0.9	0.87	0.96	0.86	0.86	0.85	0.88	0.67	0.7	0.92	0.83	0.8	0.21	0.91	0.81	0.91	0.87	0.96	0.94	0.98	0.89	0.9	0.93
chr6	23247917	0.24	0.24	0.03	0.07	0.0	0.05	0.14	0.24	0.88	0.12	0.17	0.1	0.23	0.84	0.79	0.62	0.28	0.33	0.61	0.38	0.56	0.16	0.57	0.37	0.3	0.24	0.15	0.31	0.15	0.08	0.33	0.14	0.37	0.0	0.2	0.18	0.35	0.5	0.28	0.19	0.25	0.23	0.21	0.06	0.21	0.23	0.32	0.33
chr6	23266703	0.92	0.92	0.94	1.0	0.81	0.81	0.86	0.78	0.0	0.9	0.96	0.96	0.71	0.0	0.04	0.11	0.86	0.44	0.07	0.29	0.41	0.76	0.63	0.65	0.52	0.85	0.93	0.94	1.0	0.93	0.95	0.85	0.56	0.96	0.88	0.91	0.81	0.3	0.86	0.76	0.91	0.9	0.92	0.94	0.84	1.0	0.87	0.89
chr6	23283508	0.78	0.83	0.86	0.78	0.75	0.83	0.66	0.93	0.1	0.79	0.77	0.94	0.73	0.08	0.0	0.12	0.76	0.55	0.16	0.41	0.32	0.73	0.55	0.62	0.58	0.79	0.93	0.86	0.97	0.85	0.95	0.95	0.44	0.75	0.84	0.73	0.73	0.34	0.68	0.79	0.83	0.82	0.78	0.69	0.72	1.0	0.76	0.76
chr6	23421378	0.28	0.4	0.47	0.6	0.38	0.41	0.47	0.19	0.91	0.43	0.43	0.37	0.65	0.86	0.86	0.9	0.29	0.78	0.93	0.63	0.76	0.48	0.67	0.48	0.69	0.33	0.46	0.39	0.38	0.29	0.63	0.44	0.5	0.9	0.4	0.32	0.63	0.68	0.27	0.38	0.32	0.44	0.2	0.51	0.17	0.21	0.22	0.38
chr6	23461171	1.0	1.0	0.92	0.89	1.0	0.88	1.0	1.0	0.12	1.0	1.0	0.97	0.67	0.09	0.08	0.11	1.0	0.48	0.41	0.47	0.35	0.97	0.71	0.81	0.83	1.0	0.98	0.98	1.0	0.94	1.0	0.89	0.79	1.0	0.94	0.93	0.8	0.31	0.87	0.91	1.0	1.0	1.0	0.98	1.0	1.0	1.0	1.0
chr6	23489527	0.59	0.63	0.53	0.46	0.71	0.44	0.62	0.71	0.0	0.52	0.65	0.65	0.33	0.1	0.07	0.07	0.63	0.23	0.09	0.08	0.17	0.56	0.3	0.29	0.23	0.56	0.6	0.55	0.59	0.64	0.7	0.65	0.33	0.39	0.55	0.71	0.42	0.15	0.61	0.46	0.64	0.56	0.56	0.53	0.54	0.44	0.49	0.7
chr6	23612831	0.49	0.43	0.59	0.61	0.76	0.62	0.69	0.44	0.0	0.64	0.64	0.74	0.43	0.0	0.03	0.03	0.74	0.29	0.04	0.21	0.34	0.37	0.42	0.19	0.27	0.64	0.56	0.49	0.61	0.63	0.65	0.53	0.53	0.48	0.68	0.55	0.62	0.15	0.54	0.56	0.54	0.39	0.3	0.71	0.57	0.76	0.65	0.53
chr6	23640954	0.92	0.92	0.92	0.87	0.94	0.83	0.68	0.93	0.12	0.96	0.84	0.93	0.79	0.0	0.07	0.17	0.9	0.44	0.18	0.25	0.21	0.54	0.69	0.48	0.5	0.91	0.94	0.98	0.89	0.96	0.89	0.69	0.42	1.0	0.83	0.93	0.63	0.29	0.61	0.87	0.85	0.85	0.86	0.78	1.0	1.0	0.97	0.9
chr6	23681188	1.0	0.94	1.0	0.84	0.91	0.85	0.86	1.0	0.13	0.96	1.0	0.82	0.89	0.13	0.16	0.25	0.95	0.45	0.19	0.44	0.56	0.91	0.77	0.87	0.71	0.87	0.93	0.96	0.96	0.95	0.97	1.0	0.83	0.89	0.86	1.0	0.71	0.55	0.76	0.95	0.96	0.9	1.0	1.0	1.0	1.0	1.0	0.96
chr6	23791267	0.55	0.63	0.43	0.52	0.56	0.53	0.74	0.55	0.03	0.7	0.71	0.69	0.54	0.0	0.05	0.15	0.72	0.38	0.25	0.24	0.35	0.64	0.28	0.35	0.38	0.65	0.7	0.61	0.74	0.65	0.72	0.69	0.4	0.5	0.66	0.57	0.44	0.03	0.54	0.59	0.69	0.68	0.62	0.59	0.49	0.73	0.68	0.76
chr6	23832808	1.0	1.0	1.0	1.0	1.0	0.9	0.93	1.0	0.1	1.0	1.0	0.94	0.65	0.1	0.04	0.17	1.0	0.54	0.32	0.65	0.54	0.94	0.95	0.89	0.84	1.0	0.96	0.98	1.0	0.97	1.0	0.97	0.9	1.0	0.96	1.0	0.92	0.36	0.94	0.9	1.0	1.0	1.0	0.97	1.0	1.0	1.0	1.0
chr6	23884631	0.7	0.77	0.67	0.5	0.76	0.73	0.7	0.55	0.0	0.58	0.77	0.46	0.65	0.03	0.0	0.07	0.69	0.32	0.12	0.21	0.25	0.48	0.22	0.5	0.29	0.66	0.63	0.57	0.68	0.67	0.48	0.54	0.53	0.69	0.54	0.54	0.52	0.27	0.5	0.58	0.67	0.64	0.53	0.43	0.58	0.44	0.42	0.57
chr6	24043953	1.0	1.0	1.0	0.97	1.0	1.0	1.0	1.0	0.18	1.0	1.0	1.0	0.86	0.12	0.15	0.35	1.0	0.62	0.14	0.48	0.52	0.88	0.91	0.83	0.87	1.0	1.0	1.0	1.0	1.0	1.0	1.0	0.76	1.0	0.95	0.93	0.88	0.34	0.97	0.9	1.0	1.0	1.0	1.0	1.0	1.0	1.0	1.0
chr6	24156176	1.0	1.0	1.0	1.0	1.0	0.91	0.91	1.0	0.0	1.0	0.96	0.97	0.77	0.0	0.08	0.13	1.0	0.59	0.27	0.54	0.59	0.86	0.79	1.0	0.79	0.98	1.0	1.0	1.0	1.0	1.0	1.0	0.78	1.0	0.97	0.79	0.89	0.24	0.95	0.81	1.0	1.0	1.0	0.93	1.0	1.0	1.0	1.0
chr6	24207000	0.74	0.85	0.85	0.85	0.67	0.85	0.79	0.73	0.14	0.92	0.96	0.7	0.69	0.12	0.25	0.22	0.84	0.44	0.34	0.52	0.41	0.75	0.56	0.67	0.56	0.93	0.91	0.85	0.89	0.93	1.0	0.88	0.75	0.9	0.95	0.85	0.74	0.31	0.76	0.57	0.96	0.78	0.93	0.84	0.88	0.78	0.85	0.85
chr6	24283600	0.4	0.4	0.25	0.4	0.31	0.3	0.35	0.4	1.0	0.39	0.35	0.42	0.48	1.0	1.0	0.88	0.51	0.61	0.97	0.69	0.79	0.61	0.62	0.62	0.74	0.51	0.44	0.47	0.42	0.29	0.26	0.44	0.4	0.37	0.5	0.4	0.42	0.72	0.47	0.37	0.64	0.32	0.5	0.06	0.67	0.33	0.59	0.4
chr6	24333927	0.15	0.12	0.15	0.3	0.12	0.14	0.16	0.07	1.0	0.27	0.17	0.09	0.31	0.94	1.0	0.65	0.09	0.37	0.59	0.55	0.61	0.36	0.28	0.32	0.43	0.07	0.1	0.15	0.19	0.26	0.12	0.15	0.27	0.08	0.2	0.19	0.42	0.76	0.39	0.43	0.13	0.12	0.0	0.14	0.14	0.12	0.16	0.2
chr6	24457691	0.5	0.7	0.68	0.86	0.75	0.73	0.8	0.44	0.08	0.82	0.75	0.7	0.57	0.22	0.14	0.11	0.67	0.55	0.08	0.33	0.44	0.68	0.67	0.35	0.61	0.56	0.64	0.69	0.7	0.77	0.79	0.67	0.63	0.88	0.65	0.75	0.62	0.3	0.45	0.52	0.61	0.68	0.59	0.86	0.61	0.47	0.53	0.8
chr6	24495650	0.62	0.67	0.8	0.72	0.75	0.72	0.75	0.79	0.07	0.81	0.39	0.68	0.68	0.07	0.12	0.07	0.7	0.56	0.25	0.44	0.39	0.56	0.74	0.86	0.86	0.71	0.87	0.72	0.56	0.69	0.81	0.52	0.6	0.52	0.81	0.61	0.65	0.38	0.67	0.69	0.67	0.71	0.83	0.65	0.89	0.75	0.54	0.76
chr6	24677839	1.0	0.96	1.0	1.0	1.0	1.0	0.94	1.0	0.42	1.0	1.0	1.0	0.86	0.38	0.33	0.39	1.0	0.73	0.55	0.76	0.4	0.79	0.71	0.48	0.62	1.0	1.0	0.95	1.0	1.0	1.0	0.96	0.88	1.0	0.95	1.0	0.84	0.67	0.74	0.97	1.0	1.0	1.0	1.0	1.0	1.0	1.0	1.0
chr6	24733208	0.15	0.04	0.13	0.2	0.19	0.05	0.2	0.0	0.93	0.03	0.11	0.19	0.2	0.67	0.84	0.46	0.08	0.56	0.67	0.5	0.58	0.26	0.36	0.52	0.54	0.08	0.17	0.06	0.08	0.07	0.1	0.09	0.22	0.16	0.16	0.27	0.46	0.58	0.31	0.17	0.03	0.24	0.12	0.13	0.17	0.09	0.13	0.0
chr6	24835864	0.9	1.0	0.97	1.0	1.0	0.95	0.97	1.0	0.07	0.95	1.0	1.0	0.71	0.11	0.19	0.28	0.89	0.57	0.25	0.6	0.68	0.93	0.87	0.92	0.85	0.94	0.94	0.91	0.97	1.0	0.87	0.94	0.78	1.0	0.87	0.79	0.86	0.25	0.83	0.89	0.94	0.94	0.94	0.91	0.97	0.96	0.92	1.0
chr7	1687912	0.14	0.48	0.87	0.88	0.86	0.86	0.91	0.32	0.84	0.85	0.36	0.6	0.84	0.95	1.0	0.74	0.33	0.87	0.95	0.91	0.77	0.67	0.85	0.74	0.83	0.47	0.43	0.39	0.81	0.61	0.41	0.48	0.83	0.68	0.5	0.52	0.7	0.97	0.72	0.78	0.27	0.54	0.27	0.81	0.31	0.42	0.24	0.31
chr7	10367849	0.3	0.37	0.91	0.87	0.84	0.81	0.86	0.44	0.89	0.64	0.72	0.86	0.94	0.86	0.88	0.82	0.32	0.66	0.67	0.78	0.84	0.92	0.81	0.8	0.74	0.2	0.65	0.69	0.5	0.74	0.69	0.66	0.83	0.96	0.76	0.57	0.81	1.0	0.62	0.66	0.36	0.46	0.26	0.94	0.57	0.35	0.42	0.51
chr7	10458536	0.7	0.67	0.37	0.3	0.24	0.28	0.36	0.82	0.31	0.33	0.41	0.32	0.26	0.2	0.21	0.24	0.78	0.33	0.26	0.21	0.52	0.47	0.21	0.33	0.36	0.76	0.73	0.64	0.65	0.58	0.47	0.55	0.24	0.57	0.59	0.21	0.4	0.15	0.32	0.52	0.81	0.83	0.78	0.29	0.87	0.82	0.76	0.47
chr7	10487512	0.0	0.03	0.43	0.39	0.35	0.38	0.39	0.0	0.56	0.16	0.14	0.39	0.22	0.55	0.5	0.67	0.02	0.61	0.45	0.33	0.6	0.22	0.48	0.55	0.5	0.02	0.14	0.07	0.08	0.16	0.1	0.0	0.41	0.53	0.15	0.12	0.15	0.38	0.35	0.24	0.11	0.0	0.0	0.57	0.03	0.09	0.0	0.18
chr7	28633911	0.84	0.74	0.94	0.91	0.86	0.88	0.83	0.83	0.39	0.93	0.86	0.56	0.39	0.22	0.39	0.27	0.91	0.5	0.48	0.33	0.48	0.96	0.78	0.87	0.85	0.84	0.7	0.8	0.67	0.91	0.9	0.88	0.59	0.91	0.86	0.84	0.82	0.26	0.69	0.74	0.89	0.77	0.92	0.71	0.87	0.8	0.65	1.0
chr7	28911693	0.96	0.97	0.97	1.0	1.0	1.0	0.93	0.9	0.46	0.96	0.96	0.84	0.38	0.24	0.38	0.25	0.91	0.6	0.55	0.43	0.5	1.0	0.8	0.97	1.0	0.89	0.92	0.93	0.91	0.94	0.98	0.93	0.78	0.78	0.86	0.9	0.93	0.31	0.81	0.88	0.89	0.93	1.0	0.81	0.97	0.9	0.88	1.0
chr7	28922285	1.0	0.89	1.0	1.0	1.0	1.0	0.9	1.0	0.45	0.97	0.97	0.92	0.31	0.14	0.26	0.32	0.96	0.62	0.39	0.33	0.38	0.98	0.88	0.92	0.97	0.98	0.96	1.0	0.97	1.0	1.0	0.95	0.87	0.89	0.91	0.96	0.9	0.41	0.97	0.9	1.0	1.0	1.0	0.82	1.0	1.0	1.0	0.98
chr8	4860429	0.7	0.69	0.14	0.27	0.25	0.42	0.21	0.81	0.35	0.2	0.15	0.37	0.12	0.21	0.28	0.08	0.15	0.2	0.19	0.18	0.05	0.16	0.11	0.13	0.15	0.15	0.08	0.11	0.14	0.11	0.38	0.16	0.22	0.43	0.65	0.87	0.46	0.71	0.7	0.72	0.67	0.81	0.69	0.61	0.81	0.52	0.59	0.67
chr8	5405364	0.93	1.0	0.95	1.0	1.0	1.0	1.0	0.94	0.12	0.61	0.96	0.72	0.55	0.21	0.24	0.47	0.92	0.67	0.66	0.76	0.32	0.87	0.87	0.88	0.92	0.93	0.93	0.96	0.7	0.81	0.85	0.88	0.86	1.0	0.86	0.85	0.79	0.44	0.68	0.79	0.93	1.0	1.0	0.85	0.95	0.97	1.0	0.93
chr8	11320345	0.41	0.37	0.85	0.96	0.94	0.94	0.97	0.33	1.0	0.83	0.8	1.0	1.0	0.93	0.92	1.0	0.57	1.0	1.0	1.0	1.0	0.93	0.93	1.0	0.94	0.74	0.67	0.71	0.91	0.93	0.8	0.78	0.77	0.9	0.91	0.72	0.86	1.0	0.94	0.97	0.48	0.55	0.42	1.0	0.77	0.41	0.59	0.73
chr8	11343765	0.67	0.38	0.83	0.89	1.0	0.81	0.89	0.34	1.0	0.62	0.64	1.0	0.9	1.0	0.85	1.0	0.61	1.0	1.0	0.97	1.0	0.74	0.95	0.96	0.92	0.8	0.63	0.47	0.71	0.74	0.9	0.75	0.66	1.0	0.66	0.82	0.77	0.93	0.85	0.89	0.6	0.46	0.42	1.0	0.65	0.38	0.48	0.33
chr8	11379364	0.19	0.08	0.49	0.5	0.62	0.45	0.79	0.08	0.93	0.74	0.36	0.97	0.76	0.97	0.88	0.96	0.24	0.74	0.86	0.81	0.96	0.69	1.0	1.0	0.94	0.21	0.17	0.14	0.67	0.63	0.5	0.62	0.59	0.6	0.48	0.74	0.84	0.85	0.75	0.81	0.32	0.15	0.13	1.0	0.13	0.32	0.16	0.25
chr8	11398765	0.62	0.74	0.62	0.68	0.27	0.5	0.07	0.84	0.13	0.44	0.53	0.1	0.26	0.05	0.19	0.1	0.56	0.13	0.19	0.11	0.13	0.52	0.08	0.06	0.08	0.66	0.7	0.88	0.36	0.43	0.35	0.45	0.31	0.41	0.59	0.39	0.14	0.11	0.34	0.22	0.71	0.72	0.79	0.03	0.74	0.46	0.82	0.77
chr8	11460207	0.59	0.84	0.65	0.63	0.35	0.6	0.32	0.78	0.12	0.38	0.58	0.1	0.34	0.2	0.42	0.14	0.6	0.17	0.29	0.53	0.11	0.46	0.17	0.04	0.03	0.55	0.73	0.8	0.57	0.44	0.52	0.53	0.53	0.47	0.44	0.42	0.29	0.03	0.5	0.22	0.62	0.76	0.75	0.19	0.57	0.6	0.61	0.76
chr8	11496856	0.47	0.58	0.24	0.19	0.25	0.14	0.18	0.79	0.14	0.5	0.43	0.15	0.08	0.1	0.13	0.19	0.6	0.12	0.07	0.09	0.11	0.37	0.29	0.27	0.26	0.6	0.49	0.48	0.39	0.48	0.41	0.59	0.59	0.05	0.38	0.32	0.19	0.02	0.54	0.41	0.56	0.44	0.59	0.25	0.61	0.5	0.59	0.59
chr8	11523740	0.24	0.09	0.73	0.59	0.56	0.52	0.74	0.16	0.84	0.67	0.41	0.64	0.76	0.69	0.69	0.73	0.24	0.64	0.59	0.56	0.65	0.62	0.47	0.39	0.29	0.3	0.32	0.29	0.81	0.52	0.65	0.65	0.37	0.5	0.42	0.53	0.62	0.56	0.61	0.5	0.17	0.27	0.1	0.58	0.03	0.21	0.0	0.17
chr8	11562074	0.15	0.08	0.59	0.55	0.68	0.68	0.6	0.15	0.62	0.39	0.35	0.86	0.54	0.56	0.73	0.68	0.29	0.65	0.71	0.64	0.62	0.6	0.69	0.58	0.54	0.17	0.23	0.25	0.62	0.5	0.65	0.59	0.61	0.64	0.3	0.5	0.36	0.64	0.48	0.78	0.17	0.23	0.16	0.56	0.15	0.24	0.22	0.27
chr8	21689772	0.44	0.62	0.92	0.94	1.0	1.0	0.97	0.59	0.93	0.58	0.5	0.94	1.0	1.0	0.95	1.0	0.64	0.96	1.0	1.0	0.93	0.81	0.95	1.0	1.0	0.58	0.55	0.58	0.53	0.71	0.62	0.61	1.0	0.96	0.63	0.58	0.68	0.97	0.91	0.97	0.42	0.44	0.55	0.97	0.48	0.54	0.54	0.58
chr8	23102952	0.83	0.73	0.17	0.19	0.8	0.26	0.7	0.76	0.67	0.81	0.73	0.6	0.14	0.69	0.48	0.61	0.71	0.86	0.44	0.25	0.67	0.69	0.61	0.62	0.56	0.77	0.77	0.66	0.81	0.91	0.87	0.86	0.89	0.0	0.74	0.74	0.88	0.35	0.71	0.79	0.86	0.44	0.74	0.55	0.57	0.77	0.75	0.81
chr8	23136891	0.17	0.14	0.7	0.79	0.12	0.54	0.25	0.32	0.29	0.08	0.29	0.42	0.86	0.26	0.25	0.26	0.19	0.17	0.43	0.74	0.31	0.21	0.38	0.26	0.3	0.25	0.32	0.16	0.31	0.41	0.22	0.29	0.14	1.0	0.41	0.32	0.12	0.77	0.38	0.26	0.26	0.32	0.46	0.45	0.27	0.32	0.12	0.34
chr8	23198108	1.0	1.0	0.25	0.23	1.0	0.45	1.0	1.0	1.0	1.0	0.94	0.67	0.21	0.94	0.95	0.85	0.98	1.0	0.5	0.26	1.0	1.0	0.9	0.88	1.0	0.98	0.91	1.0	1.0	1.0	1.0	0.94	0.88	0.12	1.0	0.93	0.96	0.68	0.97	1.0	0.98	1.0	1.0	0.58	0.97	1.0	1.0	0.92
chr8	23221814	1.0	1.0	0.4	0.34	1.0	0.76	1.0	0.93	1.0	1.0	0.94	0.68	0.26	0.97	1.0	0.89	0.96	0.92	0.5	0.31	1.0	1.0	0.77	0.96	0.97	1.0	1.0	1.0	1.0	1.0	0.96	0.97	1.0	0.17	1.0	0.88	1.0	0.63	1.0	0.89	1.0	1.0	1.0	0.77	1.0	1.0	1.0	0.96
chr8	23274566	0.91	1.0	0.49	0.26	1.0	0.5	0.91	0.75	0.88	0.74	0.89	0.43	0.36	0.88	0.81	0.73	0.9	0.83	0.52	0.15	0.82	0.72	0.84	0.95	0.87	0.98	0.8	0.83	0.8	0.9	0.81	0.74	0.82	0.17	0.86	0.9	0.93	0.5	0.81	0.79	0.83	0.92	0.89	0.65	0.83	0.88	0.86	0.75
chr8	23344989	0.86	0.88	0.3	0.26	0.9	0.61	0.77	0.91	0.85	0.89	0.89	0.69	0.45	0.86	0.97	0.83	0.92	0.69	0.45	0.39	0.83	0.93	0.69	0.92	0.91	0.93	0.98	0.88	0.96	0.83	1.0	1.0	1.0	0.14	0.93	0.82	0.95	0.71	0.98	0.83	0.93	0.9	0.97	0.84	0.94	0.84	0.89	0.93
chr8	23364966	1.0	1.0	0.39	0.42	1.0	0.58	1.0	1.0	1.0	1.0	1.0	0.67	0.47	0.97	1.0	1.0	1.0	1.0	0.72	0.39	0.93	1.0	0.94	1.0	0.97	1.0	1.0	1.0	1.0	1.0	1.0	1.0	1.0	0.2	1.0	1.0	1.0	0.63	1.0	1.0	1.0	1.0	1.0	0.83	1.0	1.0	1.0	1.0
chr8	23380071	0.76	0.83	0.26	0.17	0.62	0.48	0.53	0.74	0.77	0.75	0.52	0.48	0.19	0.79	0.91	0.67	0.77	0.56	0.37	0.23	0.79	0.84	0.51	0.78	0.73	0.86	0.72	0.69	0.56	0.83	0.85	0.78	0.76	0.0	0.74	0.82	0.81	0.47	0.7	0.62	0.79	0.85	0.62	0.46	0.69	0.73	0.7	0.72
chr8	23512098	0.0	0.0	0.62	0.57	0.0	0.48	0.0	0.0	0.0	0.0	0.0	0.22	0.81	0.11	0.0	0.12	0.0	0.13	0.25	0.62	0.09	0.05	0.03	0.0	0.03	0.0	0.0	0.02	0.04	0.08	0.0	0.03	0.0	0.81	0.09	0.1	0.03	0.45	0.0	0.1	0.0	0.0	0.0	0.28	0.02	0.03	0.02	0.03
chr8	23554904	0.93	0.91	0.49	0.37	1.0	0.52	1.0	0.97	1.0	0.96	1.0	0.61	0.29	1.0	1.0	0.85	0.93	0.88	0.64	0.27	1.0	0.94	0.86	0.91	0.92	0.93	1.0	0.88	0.87	0.97	1.0	0.97	0.74	0.21	0.97	0.93	0.96	0.57	0.89	0.94	0.97	0.8	0.93	0.69	0.98	0.97	0.92	1.0
chr8	23629615	0.19	0.27	0.61	0.77	0.0	0.71	0.24	0.16	0.23	0.33	0.1	0.38	0.83	0.24	0.21	0.32	0.3	0.45	0.56	0.88	0.29	0.5	0.12	0.27	0.21	0.27	0.22	0.16	0.25	0.05	0.27	0.16	0.1	0.92	0.21	0.2	0.21	0.65	0.35	0.27	0.12	0.67	0.19	0.67	0.22	0.25	0.21	0.18
chr8	23647880	0.87	0.95	0.37	0.48	0.83	0.44	0.83	0.97	0.94	1.0	0.93	0.54	0.29	0.97	0.93	0.89	0.95	0.89	0.63	0.4	0.88	0.94	0.78	0.91	0.97	0.96	0.93	0.91	0.88	1.0	0.89	0.91	0.97	0.08	1.0	0.91	0.87	0.55	0.91	0.95	0.9	0.92	0.97	0.67	0.92	0.86	0.94	1.0
chr8	23843773	0.75	0.66	0.19	0.19	0.94	0.29	0.81	0.76	0.81	0.74	0.71	0.57	0.14	0.79	0.79	0.86	0.53	0.76	0.41	0.39	0.92	0.56	0.76	0.81	0.84	0.73	0.54	0.62	0.81	0.78	0.64	0.61	0.84	0.0	0.76	0.77	0.88	0.51	0.79	0.61	0.66	0.85	0.94	0.68	0.69	0.61	0.77	0.69
chr8	23922642	0.94	1.0	0.27	0.29	1.0	0.57	0.96	1.0	1.0	1.0	1.0	0.79	0.22	1.0	1.0	0.96	1.0	0.92	0.73	0.41	1.0	1.0	0.97	0.94	0.94	0.98	1.0	1.0	1.0	0.96	1.0	0.97	0.97	0.0	1.0	1.0	1.0	0.61	1.0	0.92	1.0	0.97	1.0	0.78	1.0	1.0	1.0	1.0
chr8	23987120	0.95	1.0	0.48	0.3	1.0	0.44	0.93	1.0	0.93	1.0	1.0	0.82	0.33	0.92	1.0	0.93	0.92	0.88	0.44	0.32	1.0	0.97	0.87	1.0	0.97	0.94	1.0	0.96	1.0	0.93	0.96	0.9	1.0	0.26	0.89	0.94	0.92	0.76	0.97	0.88	1.0	1.0	1.0	0.7	1.0	0.94	0.91	0.97
chr8	24233026	0.74	0.81	0.33	0.16	0.94	0.46	0.78	0.81	0.9	0.75	0.86	0.7	0.21	0.88	0.73	0.84	0.82	0.71	0.39	0.42	0.72	0.82	0.68	0.81	0.75	0.75	0.75	0.8	0.89	0.94	1.0	0.81	0.74	0.09	0.81	0.72	0.96	0.59	0.79	0.84	0.82	0.82	0.92	0.57	0.93	0.83	0.89	0.81
chr8	24322007	1.0	1.0	0.36	0.42	0.95	0.54	0.91	0.97	1.0	1.0	0.97	0.81	0.38	0.97	0.92	1.0	0.96	1.0	0.55	0.43	1.0	1.0	1.0	1.0	1.0	1.0	1.0	1.0	1.0	0.97	1.0	1.0	0.97	0.24	0.97	1.0	1.0	0.71	0.97	0.97	1.0	0.97	1.0	0.7	0.93	1.0	1.0	0.88
chr8	24392585	0.88	0.95	0.5	0.3	0.94	0.55	0.76	0.96	0.82	0.78	1.0	0.39	0.29	0.79	0.79	0.8	0.81	0.88	0.34	0.33	0.96	0.68	0.64	0.89	0.88	0.88	0.88	0.78	0.86	0.91	0.88	0.95	0.71	0.04	1.0	0.73	0.8	0.47	0.91	0.82	0.92	0.78	0.9	0.76	0.97	0.86	0.92	0.82
chr8	24443077	1.0	1.0	0.44	0.32	1.0	0.41	1.0	1.0	1.0	0.93	0.96	0.88	0.31	0.88	0.96	0.82	0.96	0.96	0.63	0.45	0.86	0.91	1.0	1.0	0.97	0.92	1.0	0.96	0.96	0.91	1.0	0.97	0.97	0.0	1.0	0.93	1.0	0.61	0.97	0.98	1.0	1.0	1.0	0.79	1.0	1.0	1.0	1.0
chr8	24573572	1.0	0.97	0.27	0.16	1.0	0.65	1.0	1.0	1.0	1.0	1.0	0.8	0.27	0.94	0.93	0.89	1.0	1.0	0.75	0.32	1.0	1.0	0.97	0.96	1.0	1.0	1.0	1.0	1.0	1.0	1.0	1.0	1.0	0.1	1.0	0.92	1.0	0.67	1.0	0.94	1.0	1.0	1.0	0.68	1.0	1.0	0.97	0.97
chr8	24595982	1.0	1.0	0.45	0.33	1.0	0.52	1.0	1.0	1.0	1.0	1.0	0.72	0.46	1.0	0.93	0.96	1.0	0.9	0.52	0.44	1.0	0.93	0.97	1.0	1.0	0.98	0.98	1.0	1.0	1.0	1.0	1.0	1.0	0.1	1.0	0.93	1.0	0.56	1.0	0.94	1.0	1.0	1.0	0.76	1.0	1.0	1.0	1.0
chr8	24695145	1.0	1.0	0.47	0.39	1.0	0.63	1.0	1.0	1.0	1.0	1.0	0.62	0.2	1.0	1.0	0.96	1.0	1.0	0.73	0.37	1.0	1.0	0.93	1.0	1.0	1.0	1.0	1.0	1.0	1.0	1.0	1.0	1.0	0.5	1.0	0.93	1.0	0.52	1.0	1.0	1.0	1.0	1.0	0.51	1.0	1.0	1.0	1.0
chr8	24821940	0.86	0.92	0.37	0.32	0.79	0.55	0.97	0.81	1.0	0.96	0.92	0.63	0.21	0.91	0.96	0.88	0.92	0.9	0.45	0.13	0.9	0.94	0.84	0.82	0.79	0.96	0.84	0.81	0.85	0.93	0.77	0.85	0.79	0.14	0.97	0.81	0.95	0.62	0.96	0.82	0.79	0.81	0.86	0.61	0.89	0.9	0.87	0.9
chr8	24862499	0.86	1.0	0.29	0.3	0.94	0.52	0.91	0.81	0.9	0.91	0.96	0.45	0.22	0.87	0.75	0.73	0.76	0.75	0.32	0.38	0.77	0.84	0.79	0.89	0.94	0.84	0.87	0.82	1.0	0.87	0.9	0.84	0.92	0.11	0.77	0.86	0.83	0.4	0.8	0.81	0.82	0.86	0.92	0.58	0.79	1.0	0.84	0.96
chr8	24884786	1.0	1.0	0.43	0.34	1.0	0.1	0.94	1.0	1.0	0.91	0.93	0.69	0.68	0.97	0.93	0.92	0.96	0.97	0.86	0.54	0.91	1.0	0.91	1.0	1.0	0.94	1.0	0.98	1.0	1.0	1.0	1.0	0.81	0.24	0.86	0.93	0.96	0.63	1.0	0.89	1.0	1.0	1.0	0.75	0.97	1.0	1.0	1.0
chr8	24911689	0.94	0.91	0.36	0.26	1.0	0.44	0.92	0.85	0.95	0.92	0.86	0.6	0.25	0.94	0.97	0.86	0.97	0.92	0.5	0.52	0.9	1.0	0.83	0.81	0.78	0.88	0.91	0.93	1.0	0.86	0.72	0.89	0.88	0.24	0.87	1.0	0.97	0.77	0.91	0.8	0.98	1.0	0.93	0.63	0.93	1.0	0.94	0.94
chr8	24942784	1.0	1.0	0.49	0.3	1.0	0.63	1.0	1.0	1.0	1.0	1.0	0.62	0.32	1.0	0.95	0.96	1.0	0.95	0.78	0.5	1.0	1.0	0.94	1.0	1.0	1.0	1.0	1.0	1.0	1.0	1.0	1.0	0.97	0.08	1.0	0.95	1.0	0.84	1.0	1.0	1.0	1.0	1.0	0.93	1.0	1.0	1.0	1.0
chr8	24962238	0.79	0.9	0.38	0.07	0.79	0.37	0.9	0.9	0.94	0.9	0.86	0.48	0.21	0.93	0.93	0.74	0.89	0.88	0.35	0.28	0.96	0.96	0.86	0.96	0.9	0.88	0.9	0.91	0.87	0.81	1.0	0.86	0.93	0.17	0.87	0.88	0.92	0.62	0.77	1.0	0.86	0.93	0.91	0.58	0.86	0.95	0.84	0.83
chr8	24996373	0.92	0.78	0.35	0.43	0.95	0.59	1.0	0.93	0.75	0.92	0.93	0.52	0.15	0.78	0.74	0.87	0.82	0.78	0.68	0.26	0.71	0.79	0.69	1.0	0.83	0.88	0.96	0.89	0.83	0.94	1.0	0.91	0.88	0.13	0.95	0.8	0.92	0.44	0.89	0.76	0.86	0.91	0.79	0.7	0.97	0.8	0.83	0.89
chr8	25030719	0.91	0.64	0.48	0.13	0.95	0.41	0.75	0.69	0.72	0.83	0.77	0.5	0.21	0.66	0.74	0.69	0.78	0.56	0.26	0.25	0.79	0.78	0.77	0.58	0.63	0.8	0.72	0.65	0.78	0.79	0.44	0.83	0.61	0.09	0.79	0.75	0.82	0.55	0.74	0.82	0.76	0.78	0.86	0.31	0.78	0.85	0.79	0.7
chr8	25085292	0.85	0.63	0.2	0.07	0.61	0.17	0.72	0.69	0.77	0.79	0.62	0.37	0.15	0.6	0.61	0.5	0.58	0.69	0.34	0.19	0.76	0.89	0.51	0.7	0.78	0.68	0.65	0.76	0.71	0.85	0.5	0.85	0.61	0.17	0.56	0.65	0.71	0.43	0.6	0.71	0.73	0.79	0.79	0.44	0.68	0.73	0.73	0.81
chr8	25140634	1.0	1.0	0.33	0.32	0.85	0.67	0.88	0.98	1.0	0.95	1.0	0.65	0.27	0.97	0.87	0.93	1.0	0.9	0.62	0.34	1.0	0.87	0.97	0.96	1.0	1.0	1.0	1.0	1.0	1.0	1.0	0.9	0.97	0.33	1.0	1.0	1.0	0.7	0.9	1.0	0.93	1.0	1.0	0.7	1.0	1.0	1.0	1.0
chr8	25218515	1.0	1.0	0.31	0.18	0.74	0.42	0.81	1.0	1.0	1.0	0.83	0.74	0.38	0.81	1.0	0.89	0.96	1.0	0.65	0.45	0.88	0.95	0.96	1.0	0.93	0.94	1.0	0.93	0.8	0.85	0.84	0.95	0.91	0.5	0.94	1.0	1.0	0.67	0.9	0.81	1.0	0.95	1.0	0.79	1.0	1.0	0.97	0.96
chr8	25333096	0.84	0.83	0.27	0.47	0.79	0.61	0.79	0.77	1.0	0.85	0.95	0.64	0.2	0.87	0.96	0.62	0.93	0.96	0.5	0.46	0.97	0.91	0.68	0.88	0.81	0.83	0.89	0.9	0.79	0.93	0.68	0.89	1.0	0.33	0.97	0.74	1.0	0.3	0.91	0.82	0.78	0.92	1.0	0.61	0.82	0.9	0.89	0.83
chr8	25356945	0.06	0.07	0.68	0.7	0.05	0.55	0.06	0.03	0.2	0.11	0.24	0.46	0.86	0.06	0.12	0.28	0.04	0.09	0.58	0.74	0.17	0.04	0.16	0.26	0.19	0.1	0.19	0.08	0.12	0.12	0.0	0.09	0.15	0.88	0.15	0.33	0.21	0.5	0.09	0.19	0.2	0.08	0.07	0.38	0.08	0.08	0.05	0.15
chr8	25383246	0.84	1.0	0.36	0.19	0.94	0.3	0.92	0.73	0.93	1.0	0.91	0.52	0.14	0.92	0.88	0.87	0.84	0.93	0.63	0.43	0.81	0.87	0.74	0.91	0.85	0.93	0.93	0.86	0.88	0.9	0.95	0.9	0.86	0.25	0.84	1.0	0.91	0.59	0.93	0.84	0.77	0.94	0.92	0.62	0.95	0.71	0.86	0.96
chr8	25398294	1.0	0.95	0.43	0.27	0.84	0.55	0.93	0.9	1.0	0.92	0.85	0.5	0.09	0.87	0.88	0.77	0.96	1.0	0.37	0.33	0.87	1.0	0.8	1.0	0.95	0.92	0.95	0.93	0.96	0.93	0.83	0.87	0.97	0.05	0.97	0.74	0.85	0.63	0.94	0.83	0.97	0.81	0.9	0.69	0.97	1.0	0.98	0.97
chr8	25433132	0.9	0.82	0.34	0.34	0.82	0.53	0.96	0.86	0.77	0.81	0.76	0.41	0.16	0.85	0.9	0.59	0.81	0.79	0.33	0.33	0.88	0.84	0.74	0.92	0.91	0.65	0.78	0.78	0.84	0.88	0.89	0.86	0.8	0.11	0.86	0.97	0.86	0.5	0.96	0.82	0.85	0.88	0.93	0.68	0.76	0.93	0.85	0.79
chr8	25488354	0.95	1.0	0.36	0.11	0.83	0.52	0.91	1.0	0.9	0.96	0.95	0.53	0.18	0.91	1.0	0.85	0.9	0.74	0.45	0.41	0.96	0.89	0.92	0.81	0.88	0.88	0.89	0.91	0.89	0.96	1.0	0.97	0.87	0.04	0.94	0.82	0.96	0.46	0.87	0.85	0.95	1.0	0.92	0.64	0.79	1.0	0.93	1.0
chr8	25521170	1.0	1.0	0.37	0.13	1.0	0.5	1.0	0.96	0.93	1.0	1.0	0.66	0.5	0.97	0.92	0.91	0.9	0.69	0.37	0.3	0.92	1.0	0.81	0.97	1.0	0.93	0.96	0.94	0.97	0.96	0.9	0.88	0.97	0.18	1.0	0.86	1.0	0.47	1.0	1.0	0.97	0.92	1.0	0.66	0.94	1.0	0.93	1.0
chr8	25552011	0.97	1.0	0.22	0.22	0.91	0.44	0.87	1.0	0.94	0.86	1.0	0.59	0.32	0.92	0.86	0.93	0.89	0.79	0.39	0.25	0.87	0.85	0.97	0.82	0.97	0.94	0.98	0.93	0.77	0.97	0.83	0.94	0.91	0.0	0.88	0.92	0.96	0.57	0.97	0.84	0.9	0.89	0.8	0.71	0.88	0.9	1.0	1.0
chr8	25573859	1.0	1.0	0.39	0.38	1.0	0.53	0.97	0.96	0.93	1.0	1.0	0.77	0.32	0.97	0.93	0.87	0.95	0.96	0.68	0.39	1.0	0.94	0.96	1.0	0.91	1.0	1.0	0.98	1.0	1.0	1.0	0.95	0.97	0.12	1.0	0.96	1.0	0.7	0.93	0.81	1.0	1.0	1.0	0.7	1.0	1.0	1.0	1.0
chr8	25593015	0.81	0.82	0.25	0.13	0.7	0.19	0.64	0.72	0.81	0.83	0.71	0.55	0.12	0.84	0.65	0.69	0.73	0.81	0.5	0.32	0.76	0.73	0.55	0.86	0.78	0.78	0.81	0.81	0.78	0.93	0.67	0.79	0.58	0.04	0.62	0.67	0.81	0.49	0.71	0.73	0.79	0.79	0.68	0.53	0.82	0.74	0.67	0.72
chr8	25642257	1.0	0.81	0.38	0.14	1.0	0.5	0.86	0.86	0.88	0.88	1.0	0.53	0.17	0.79	0.96	0.64	0.95	0.88	0.45	0.35	0.82	0.89	0.84	0.81	0.87	0.88	0.86	0.9	0.85	0.86	0.93	0.91	0.83	0.11	0.91	0.75	1.0	0.44	0.81	0.76	0.88	0.67	0.77	0.72	0.92	0.95	0.87	0.91
chr8	25658911	0.75	0.91	0.29	0.35	0.82	0.62	0.86	0.81	0.96	0.82	0.82	0.53	0.17	0.83	0.48	0.64	0.72	0.92	0.38	0.33	0.77	0.86	0.73	0.7	0.8	0.64	0.84	0.81	0.65	0.81	0.65	0.69	0.66	0.1	0.73	0.66	0.61	0.24	0.77	0.88	0.83	0.88	0.87	0.52	0.84	0.71	0.89	0.85
chr8	25716363	0.87	0.84	0.29	0.26	0.53	0.29	0.47	0.64	0.85	0.81	0.84	0.57	0.2	0.68	0.88	0.68	0.7	0.7	0.41	0.34	0.96	0.67	0.82	0.69	0.84	0.89	0.92	0.85	0.81	0.8	0.53	0.72	0.76	0.13	0.63	0.79	0.67	0.5	0.74	0.68	0.7	0.73	0.86	0.37	0.79	0.88	0.8	0.82
chr8	25852761	0.97	0.96	0.46	0.41	0.81	0.56	0.72	1.0	1.0	1.0	1.0	0.83	0.32	1.0	0.89	0.87	0.96	0.9	0.59	0.32	0.96	0.93	0.94	1.0	1.0	0.94	1.0	1.0	1.0	1.0	1.0	1.0	1.0	0.11	0.94	1.0	1.0	0.73	1.0	0.84	0.97	0.93	1.0	0.74	0.94	0.96	1.0	1.0
chr8	25886432	0.93	0.93	0.31	0.3	1.0	0.59	0.97	0.93	0.93	0.96	1.0	0.55	0.31	1.0	0.96	0.9	0.96	0.96	0.59	0.39	0.87	1.0	0.86	0.96	1.0	0.92	0.96	0.98	1.0	0.93	1.0	1.0	0.97	0.41	1.0	1.0	0.97	0.59	0.93	0.89	0.95	0.92	1.0	0.85	0.97	1.0	0.91	0.88
chr8	25974898	0.88	0.93	0.32	0.33	0.71	0.41	0.87	0.86	0.93	0.67	0.91	0.72	0.19	0.85	0.62	0.75	0.72	0.91	0.39	0.27	0.69	0.93	0.81	0.73	0.63	0.78	0.9	0.77	0.79	0.86	0.65	0.91	0.97	0.0	0.81	0.83	0.82	0.51	0.69	0.88	0.91	0.92	0.97	0.62	0.81	0.65	0.89	0.83
chr8	25999678	0.9	1.0	0.28	0.33	1.0	0.53	1.0	0.9	1.0	1.0	1.0	0.66	0.27	0.92	0.92	1.0	0.93	0.86	0.7	0.4	0.9	0.88	1.0	1.0	1.0	1.0	0.96	0.98	1.0	1.0	1.0	0.97	0.88	0.09	0.93	0.76	1.0	0.69	0.93	0.85	1.0	0.93	1.0	0.7	0.92	0.91	1.0	0.97
chr8	26097305	0.68	0.89	0.14	0.39	0.68	0.7	1.0	0.72	1.0	0.73	0.53	0.58	0.29	0.88	0.86	0.87	0.88	0.86	0.67	0.39	0.65	0.9	0.8	0.85	0.86	0.83	0.74	0.85	0.83	0.9	0.94	0.9	0.8	0.12	0.79	0.79	0.87	0.37	0.87	0.76	0.83	0.74	0.84	0.57	0.82	0.95	0.82	0.79
chr8	26121081	0.95	0.94	0.49	0.33	0.94	0.53	0.93	0.97	0.71	0.82	1.0	0.66	0.19	1.0	0.87	0.8	0.92	0.83	0.55	0.38	0.78	0.93	0.88	0.85	0.97	0.97	1.0	0.88	1.0	1.0	1.0	1.0	0.97	0.15	0.85	0.76	0.91	0.55	0.91	0.89	1.0	1.0	0.92	0.73	1.0	1.0	1.0	0.96
chr8	26174279	0.57	0.51	0.2	0.15	0.7	0.26	0.73	0.73	0.68	0.56	0.71	0.65	0.13	0.58	0.41	0.6	0.68	0.74	0.38	0.15	0.85	0.57	0.55	0.79	0.81	0.8	0.61	0.56	0.67	0.62	0.38	0.53	0.84	0.0	0.53	0.62	0.62	0.27	0.53	0.67	0.69	0.82	0.79	0.42	0.74	0.75	0.62	0.6
chr8	26319321	0.71	0.73	0.26	0.13	0.25	0.15	0.5	0.9	0.5	0.71	0.81	0.23	0.17	0.09	0.33	0.41	0.89	0.26	0.21	0.23	0.46	0.64	0.61	0.4	0.34	0.9	0.81	0.81	0.76	0.81	0.82	0.74	0.58	0.08	0.62	0.69	0.52	0.32	0.55	0.51	0.81	0.88	0.78	0.41	0.81	0.88	0.88	0.74
chr8	26430005	0.92	0.9	0.29	0.24	0.96	0.52	0.83	0.92	0.94	0.89	1.0	0.48	0.17	0.9	0.93	0.74	0.94	0.89	0.45	0.36	0.87	0.9	0.91	0.93	0.87	0.85	0.93	0.85	1.0	1.0	0.55	0.92	0.74	0.17	0.84	0.75	0.96	0.57	0.86	0.84	0.93	0.89	1.0	0.52	0.87	1.0	0.82	1.0
chr8	26472329	0.18	0.28	0.61	0.65	0.06	0.64	0.23	0.17	0.17	0.22	0.33	0.42	0.93	0.48	0.18	0.38	0.21	0.29	0.63	0.93	0.24	0.36	0.27	0.32	0.13	0.2	0.2	0.27	0.25	0.31	0.04	0.43	0.32	0.96	0.23	0.43	0.12	0.51	0.27	0.35	0.16	0.16	0.21	0.43	0.28	0.19	0.18	0.41
chr8	26512334	0.93	0.93	0.43	0.35	0.9	0.59	0.91	0.86	0.96	0.95	0.96	0.79	0.21	0.9	0.79	0.87	0.96	0.76	0.39	0.41	1.0	0.97	0.91	0.94	0.97	0.98	0.91	0.96	0.91	0.94	0.45	0.88	0.85	0.22	0.89	0.9	0.96	0.67	0.97	0.97	1.0	0.94	1.0	0.68	0.9	0.95	0.92	0.97
chr8	26524553	1.0	0.97	0.45	0.26	1.0	0.52	1.0	1.0	0.97	1.0	0.91	0.74	0.3	0.97	1.0	0.91	1.0	0.96	0.52	0.45	0.9	1.0	0.97	1.0	1.0	1.0	1.0	1.0	1.0	0.96	1.0	1.0	1.0	0.12	1.0	0.89	1.0	0.81	0.97	1.0	1.0	1.0	1.0	0.82	1.0	1.0	1.0	1.0
chr8	26783777	0.97	0.75	0.47	0.45	1.0	0.56	0.97	1.0	0.93	1.0	0.9	0.68	0.27	0.9	0.86	1.0	0.96	0.89	0.62	0.19	0.88	0.91	0.91	1.0	0.93	0.85	0.98	0.91	1.0	0.92	1.0	1.0	1.0	0.11	0.87	0.81	1.0	0.57	0.92	0.79	0.95	0.75	1.0	0.67	0.89	1.0	0.95	0.97
chr8	26816132	1.0	1.0	0.54	0.3	1.0	0.67	1.0	1.0	1.0	1.0	0.96	0.68	0.36	1.0	1.0	0.88	1.0	1.0	0.38	0.41	1.0	1.0	0.97	1.0	1.0	1.0	1.0	1.0	1.0	1.0	1.0	0.97	0.97	0.18	0.97	1.0	1.0	0.66	1.0	0.97	1.0	1.0	1.0	0.73	1.0	1.0	1.0	1.0
chr8	26868222	0.76	0.77	0.32	0.1	1.0	0.46	0.87	0.93	0.96	0.73	0.8	0.57	0.08	0.73	0.94	0.76	0.86	0.86	0.29	0.3	0.69	0.87	0.87	0.79	0.85	0.77	0.93	0.72	0.83	0.77	0.94	0.81	0.73	0.0	0.95	0.68	0.92	0.45	0.79	0.81	0.79	0.74	0.85	0.35	0.82	0.78	0.78	0.91
chr8	26893899	0.75	0.81	0.28	0.08	0.72	0.43	0.83	0.86	0.62	0.9	0.9	0.61	0.1	0.87	0.69	0.86	0.79	0.79	0.17	0.42	0.54	0.74	0.81	0.82	0.83	0.84	0.88	0.74	0.75	0.79	0.83	0.86	0.88	0.06	0.67	0.75	0.83	0.41	0.81	0.86	0.95	0.95	0.76	0.5	0.82	0.89	0.88	0.91
chr8	26968470	0.94	0.81	0.24	0.18	0.78	0.61	0.87	0.86	0.81	0.87	0.91	0.45	0.44	0.9	0.86	0.83	0.91	0.79	0.74	0.27	0.91	0.97	0.76	0.96	0.92	0.93	0.94	0.9	0.82	0.91	1.0	0.87	0.97	0.19	0.9	0.75	0.93	0.54	0.87	0.81	0.93	0.92	0.91	0.65	0.84	1.0	0.91	0.85
chr8	27006477	0.67	0.88	0.3	0.11	0.76	0.39	0.75	0.8	0.76	0.6	0.65	0.57	0.08	0.75	0.83	0.57	0.84	0.88	0.52	0.31	0.91	0.79	0.52	0.7	0.68	0.78	0.61	0.77	0.84	0.85	0.79	0.82	0.63	0.0	0.74	0.69	0.73	0.45	0.74	0.7	0.58	0.88	0.77	0.37	0.68	0.8	0.79	0.75
chr8	27045274	0.97	0.96	0.32	0.25	1.0	0.55	0.84	0.97	1.0	0.92	0.93	0.72	0.22	0.91	0.84	0.77	0.9	0.86	0.55	0.41	1.0	0.84	0.78	1.0	0.85	0.93	1.0	0.91	0.95	0.94	1.0	0.93	0.83	0.26	0.97	0.96	1.0	0.54	0.91	0.84	0.86	0.92	1.0	0.63	0.89	0.89	0.95	1.0
chr8	27104280	0.69	0.76	0.28	0.16	0.76	0.62	0.85	0.89	0.87	0.66	0.75	0.38	0.18	0.78	0.75	0.7	0.75	0.71	0.38	0.29	0.76	0.83	0.83	0.62	0.67	0.74	0.82	0.69	0.87	0.86	0.83	0.85	0.86	0.0	0.79	0.67	0.73	0.46	0.5	0.79	0.74	0.88	0.93	0.63	0.78	0.9	0.79	0.72
chr8	27168098	0.08	0.14	0.65	0.81	0.15	0.67	0.16	0.2	0.18	0.19	0.26	0.48	0.88	0.29	0.13	0.3	0.28	0.2	0.5	0.73	0.44	0.09	0.31	0.34	0.23	0.19	0.25	0.25	0.29	0.28	0.1	0.41	0.24	0.96	0.24	0.15	0.2	0.5	0.21	0.31	0.3	0.23	0.23	0.46	0.16	0.18	0.33	0.35
chr8	27243982	0.88	0.86	0.44	0.25	0.94	0.33	0.86	0.86	0.92	0.9	0.9	0.79	0.33	1.0	0.88	0.84	0.98	0.92	0.5	0.46	0.89	0.88	0.89	0.96	0.97	0.9	0.88	0.87	0.9	0.94	1.0	0.9	1.0	0.26	0.94	0.59	0.84	0.54	0.89	0.84	0.91	0.91	0.9	0.5	0.88	0.9	0.9	0.97
chr8	27311806	1.0	1.0	0.32	0.15	0.84	0.58	0.69	0.97	1.0	1.0	1.0	0.84	0.47	1.0	1.0	0.87	1.0	0.84	0.72	0.52	1.0	1.0	0.93	1.0	1.0	0.95	1.0	1.0	1.0	0.97	1.0	1.0	0.9	0.1	1.0	0.9	1.0	0.81	1.0	1.0	1.0	0.95	1.0	0.68	1.0	1.0	0.97	1.0
chr8	27357466	0.97	1.0	0.41	0.22	0.94	0.55	1.0	0.93	0.93	0.96	0.95	0.7	0.32	0.92	0.97	0.85	1.0	0.91	0.5	0.44	0.96	1.0	0.96	0.92	0.97	0.96	1.0	0.96	1.0	0.97	0.89	0.97	0.97	0.13	0.94	0.92	0.9	0.69	0.97	0.88	1.0	1.0	0.86	0.69	0.97	1.0	0.92	0.94
chr8	27393556	0.72	0.78	0.33	0.23	0.68	0.33	0.46	0.91	0.71	0.94	0.83	0.59	0.11	0.79	0.73	0.79	0.81	0.77	0.39	0.2	0.79	0.73	0.77	0.69	0.64	0.73	0.8	0.78	0.59	0.83	0.89	0.72	0.84	0.22	0.83	0.83	0.85	0.38	0.71	0.75	0.84	0.76	0.74	0.71	0.89	0.8	0.85	0.68
chr8	27409634	1.0	1.0	0.31	0.33	0.82	0.56	0.87	0.97	0.96	1.0	1.0	0.7	0.39	1.0	0.96	0.79	1.0	0.88	0.65	0.5	1.0	0.96	1.0	1.0	1.0	0.92	1.0	1.0	1.0	1.0	1.0	0.97	1.0	0.32	0.94	1.0	1.0	0.57	0.95	0.94	1.0	0.97	1.0	0.77	1.0	1.0	0.94	1.0
chr8	27458119	0.83	0.76	0.23	0.12	0.75	0.37	0.68	0.79	0.76	0.7	0.7	0.5	0.17	0.7	0.55	0.73	0.68	0.61	0.35	0.2	0.72	0.81	0.69	0.75	0.59	0.8	0.64	0.8	0.85	0.57	0.81	0.71	0.62	0.0	0.86	0.68	0.79	0.44	0.66	0.73	0.79	0.76	0.57	0.28	0.85	0.6	0.65	0.84
chr8	27494891	0.92	0.78	0.34	0.07	0.41	0.21	0.64	0.76	0.71	0.79	0.78	0.44	0.13	0.76	0.86	0.68	0.74	0.88	0.37	0.08	0.67	0.92	0.57	0.76	0.77	0.89	0.67	0.8	0.77	0.5	0.75	0.87	0.7	0.05	0.82	0.7	0.74	0.45	0.59	0.72	0.76	0.63	0.67	0.58	0.61	0.62	0.82	0.75
chr8	27569273	1.0	1.0	0.57	0.28	1.0	0.68	0.97	1.0	1.0	1.0	1.0	0.79	0.38	0.97	1.0	0.9	1.0	0.94	0.57	0.36	0.96	0.96	1.0	0.92	0.92	0.98	1.0	1.0	1.0	0.97	1.0	0.94	1.0	0.1	0.97	0.92	1.0	0.67	1.0	0.95	1.0	1.0	1.0	0.78	1.0	1.0	1.0	0.95
chr8	27600567	0.22	0.31	0.71	0.91	0.24	0.7	0.25	0.21	0.23	0.08	0.29	0.53	0.68	0.22	0.23	0.46	0.14	0.37	0.52	0.86	0.21	0.35	0.39	0.42	0.38	0.26	0.19	0.12	0.43	0.19	0.26	0.18	0.3	0.95	0.21	0.17	0.21	0.47	0.27	0.23	0.21	0.24	0.24	0.44	0.19	0.22	0.33	0.3
chr8	27677620	0.41	0.76	0.17	0.11	0.73	0.16	0.55	0.74	0.45	0.55	0.43	0.38	0.0	0.35	0.28	0.37	0.62	0.38	0.22	0.06	0.32	0.55	0.52	0.52	0.61	0.68	0.39	0.45	0.59	0.79	0.71	0.58	0.67	0.0	0.29	0.63	0.72	0.09	0.36	0.61	0.62	0.58	0.71	0.31	0.63	0.58	0.53	0.48
chr8	27710646	0.85	0.91	0.27	0.24	1.0	0.67	1.0	0.94	1.0	0.86	0.95	0.75	0.21	0.94	0.96	0.74	0.93	0.81	0.66	0.42	1.0	0.86	0.89	0.81	0.97	0.93	0.98	0.93	0.87	0.93	0.91	0.84	0.9	0.35	0.97	0.96	0.9	0.63	0.89	0.87	1.0	0.97	0.96	0.67	0.93	1.0	0.93	0.94
chr8	27789146	0.21	0.34	0.84	0.84	0.26	0.82	0.11	0.16	0.56	0.26	0.57	0.66	0.9	0.82	0.52	0.76	0.19	0.41	0.73	0.9	0.32	0.34	0.37	0.33	0.35	0.22	0.6	0.5	0.44	0.25	0.37	0.29	0.47	0.81	0.61	0.44	0.3	0.81	0.38	0.35	0.29	0.49	0.31	0.63	0.44	0.27	0.5	0.54
chr8	27814851	0.94	0.8	0.44	0.23	1.0	0.45	1.0	0.93	0.91	0.9	0.97	0.53	0.22	0.92	0.69	0.86	0.94	0.91	0.5	0.26	0.86	0.91	0.88	0.91	0.92	0.88	0.87	0.92	1.0	0.89	0.91	0.86	0.58	0.08	0.94	0.87	0.97	0.58	1.0	0.78	0.89	0.94	1.0	0.53	0.88	1.0	0.92	0.91
chr8	27847828	0.85	0.79	0.28	0.24	0.95	0.3	0.97	0.79	0.64	0.93	0.74	0.62	0.07	0.71	0.74	0.71	0.84	0.73	0.33	0.22	0.9	0.87	0.69	0.73	0.82	0.77	0.81	0.8	0.75	0.86	0.76	0.72	0.79	0.0	0.84	0.81	0.96	0.55	0.85	0.82	0.7	0.75	0.48	0.59	0.72	0.89	0.81	0.97
chr8	27865301	1.0	1.0	0.41	0.37	0.95	0.35	0.97	1.0	1.0	1.0	0.95	0.88	0.38	0.92	1.0	0.93	1.0	0.96	0.63	0.55	0.97	1.0	0.87	1.0	1.0	1.0	1.0	1.0	1.0	1.0	1.0	1.0	1.0	0.11	0.97	0.97	1.0	0.72	0.97	0.96	1.0	1.0	1.0	0.89	1.0	1.0	1.0	1.0
chr8	27928228	0.97	0.97	0.56	0.41	1.0	0.67	0.94	1.0	0.92	1.0	1.0	0.69	0.22	0.85	0.83	0.86	0.98	1.0	0.53	0.37	0.96	0.94	0.97	0.9	0.79	0.96	1.0	0.93	0.88	0.86	1.0	0.93	0.9	0.19	0.95	1.0	0.88	0.61	0.9	0.87	0.97	1.0	0.97	0.81	0.92	1.0	1.0	0.97
chr8	27943970	0.28	0.64	0.93	0.91	0.91	0.71	0.85	0.43	0.5	0.38	0.64	0.62	0.97	0.58	0.25	0.43	0.39	0.54	0.71	0.87	0.66	0.35	0.25	0.37	0.34	0.29	0.37	0.46	0.35	0.56	0.6	0.44	0.4	0.93	0.4	0.51	0.29	0.68	0.54	0.41	0.51	0.35	0.58	0.86	0.32	0.54	0.53	0.26
chr8	27971406	0.9	0.67	0.19	0.32	0.94	0.19	0.77	0.79	0.83	0.93	0.82	0.61	0.35	0.76	0.69	0.69	0.9	0.88	0.34	0.46	0.74	0.67	0.85	0.81	0.78	0.72	0.82	0.77	0.81	0.88	0.83	0.79	0.93	0.12	0.88	0.57	0.62	0.81	0.94	0.67	0.83	0.92	0.73	0.5	0.77	0.84	0.86	0.78
chr8	28108586	0.4	0.52	0.81	0.77	0.06	0.78	0.04	0.33	0.4	0.3	0.23	0.44	0.83	0.31	0.22	0.64	0.38	0.44	0.67	0.81	0.29	0.38	0.25	0.28	0.42	0.43	0.53	0.41	0.17	0.48	0.2	0.38	0.1	1.0	0.44	0.32	0.45	0.59	0.37	0.43	0.32	0.53	0.33	0.67	0.35	0.41	0.41	0.32
chr8	28146412	0.79	0.89	0.38	0.16	0.8	0.39	0.73	0.88	0.94	0.7	0.8	0.55	0.17	0.91	0.82	0.7	0.76	0.77	0.52	0.19	0.87	0.76	0.73	0.69	0.86	0.87	0.76	0.87	0.59	0.83	0.83	0.87	0.72	0.15	0.75	0.81	0.84	0.49	0.89	0.7	0.63	0.73	0.86	0.47	0.81	0.5	0.88	0.76
chr8	28276126	0.83	0.86	0.53	0.34	0.94	0.24	0.92	0.74	0.92	0.73	0.7	0.54	0.06	0.73	0.64	0.78	0.81	0.67	0.53	0.42	0.87	0.93	0.77	0.81	0.77	0.82	0.82	0.71	0.93	0.96	0.68	0.81	0.97	0.17	0.81	0.85	0.89	0.51	0.81	0.67	0.89	0.73	0.86	0.6	0.93	0.79	0.89	0.8
chr8	28534318	0.17	0.24	0.7	0.74	0.25	0.56	0.14	0.21	0.37	0.16	0.05	0.53	0.82	0.27	0.32	0.5	0.09	0.3	0.48	0.85	0.27	0.08	0.1	0.32	0.26	0.15	0.32	0.27	0.21	0.24	0.2	0.11	0.12	0.67	0.44	0.33	0.42	0.25	0.12	0.12	0.09	0.18	0.31	0.58	0.28	0.16	0.28	0.09
chr8	28633999	1.0	0.91	0.38	0.62	1.0	0.67	1.0	1.0	1.0	1.0	1.0	0.84	0.21	1.0	1.0	0.92	1.0	0.92	0.52	0.52	1.0	1.0	1.0	1.0	1.0	1.0	1.0	1.0	1.0	1.0	1.0	1.0	1.0	0.16	1.0	1.0	1.0	0.78	1.0	0.97	1.0	0.97	0.96	0.84	1.0	1.0	1.0	1.0
chr8	28662141	0.57	0.27	0.97	0.85	0.4	0.95	0.52	0.17	0.35	0.48	0.11	0.53	0.86	0.29	0.25	0.31	0.27	0.52	0.61	0.72	0.42	0.25	0.5	0.29	0.32	0.33	0.4	0.38	0.63	0.35	0.08	0.36	0.15	0.9	0.32	0.33	0.29	0.52	0.19	0.37	0.29	0.27	0.42	0.55	0.32	0.15	0.43	0.41
chr8	28678571	0.93	0.92	0.43	0.46	1.0	0.71	1.0	0.94	1.0	1.0	0.91	0.75	0.22	0.97	0.93	0.93	0.95	1.0	0.44	0.52	0.96	1.0	0.96	1.0	1.0	1.0	0.97	0.92	1.0	1.0	0.88	1.0	0.97	0.1	1.0	0.88	1.0	0.79	0.96	0.88	0.89	1.0	0.93	0.79	1.0	1.0	1.0	1.0
chr8	28718932	0.87	0.7	0.15	0.24	0.84	0.38	0.85	0.85	0.71	0.75	0.83	0.53	0.07	0.86	0.56	0.57	0.83	0.62	0.52	0.33	0.76	0.69	0.78	0.55	0.84	0.76	0.84	0.83	0.85	0.87	0.79	0.85	0.85	0.25	0.74	0.68	0.71	0.66	0.72	0.82	0.89	0.81	0.75	0.52	0.93	0.68	0.7	0.76
chr8	28748190	0.24	0.04	0.59	0.55	0.0	0.42	0.0	0.05	0.0	0.05	0.05	0.22	0.88	0.0	0.05	0.0	0.05	0.04	0.48	0.53	0.0	0.15	0.06	0.03	0.0	0.0	0.0	0.06	0.03	0.0	0.0	0.0	0.0	0.73	0.0	0.07	0.18	0.43	0.0	0.03	0.03	0.0	0.0	0.27	0.0	0.04	0.0	0.0
chr8	28775940	1.0	1.0	0.32	0.19	1.0	0.4	0.91	1.0	1.0	0.92	1.0	0.7	0.27	0.92	1.0	0.92	0.97	0.78	0.5	0.25	0.97	0.97	0.92	1.0	0.94	1.0	1.0	1.0	1.0	1.0	1.0	1.0	0.97	0.06	1.0	0.88	0.96	0.57	1.0	0.89	0.98	0.97	0.96	0.79	1.0	1.0	0.96	1.0
chr8	28878224	1.0	0.88	0.46	0.35	0.84	0.62	0.94	0.76	0.86	0.89	0.96	0.61	0.2	0.81	0.85	0.66	0.89	0.62	0.42	0.29	0.76	0.93	0.73	0.77	0.73	0.88	0.83	0.78	0.9	0.96	1.0	0.88	0.93	0.27	0.85	0.83	0.96	0.65	0.86	0.74	0.92	0.72	0.79	0.35	0.88	0.88	0.83	1.0
chr8	28906325	1.0	1.0	0.31	0.34	1.0	0.57	1.0	1.0	0.94	0.96	0.88	0.75	0.32	1.0	1.0	0.83	1.0	0.91	0.66	0.44	0.91	1.0	0.91	1.0	0.97	0.96	0.96	0.96	1.0	1.0	1.0	1.0	0.97	0.16	1.0	1.0	0.83	0.72	1.0	0.88	1.0	1.0	0.96	0.78	1.0	1.0	0.96	0.96
chr8	28945958	1.0	0.97	0.76	0.68	0.83	0.92	0.97	0.97	0.86	0.97	1.0	0.47	0.53	0.9	0.74	0.7	0.98	0.61	0.58	0.82	0.59	0.83	0.43	0.54	0.56	1.0	0.97	0.98	1.0	0.92	1.0	1.0	0.54	0.27	0.98	0.96	0.75	0.67	0.65	0.7	0.95	1.0	0.94	0.39	0.97	1.0	0.97	1.0
chr8	29011371	0.86	0.94	0.33	0.09	0.9	0.3	0.85	0.88	0.74	0.79	0.78	0.42	0.08	0.69	0.86	0.78	0.81	0.74	0.31	0.27	0.91	0.88	0.69	0.86	0.86	0.85	0.93	0.9	0.76	0.82	1.0	0.91	0.82	0.04	0.87	0.8	0.91	0.41	0.87	0.76	0.84	0.91	0.86	0.61	0.91	0.81	0.74	0.7
chr8	29056190	0.92	0.75	0.31	0.25	0.65	0.33	0.59	0.72	0.81	0.85	0.88	0.65	0.26	0.7	0.89	0.75	0.87	0.69	0.32	0.17	0.81	0.88	0.78	0.88	0.94	0.86	0.77	0.8	0.88	0.9	0.91	0.81	0.77	0.17	0.75	0.79	0.83	0.47	0.73	0.67	0.91	0.78	1.0	0.41	0.71	0.78	0.69	0.91
chr8	29082191	0.76	0.88	0.39	0.29	1.0	0.5	1.0	0.95	0.85	0.91	0.92	0.47	0.36	0.93	0.86	0.85	0.92	0.9	0.39	0.21	0.96	0.97	0.75	1.0	0.97	0.93	0.9	0.96	0.92	0.97	0.72	0.9	0.97	0.15	1.0	0.92	0.95	0.62	0.79	0.85	0.81	0.94	0.85	0.71	0.94	0.87	0.82	0.97
chr8	29153370	0.94	0.84	0.42	0.14	0.74	0.47	0.81	0.97	0.8	0.75	0.78	0.67	0.11	0.91	0.86	0.72	0.83	0.6	0.47	0.31	0.7	0.83	0.89	0.83	0.86	0.87	0.82	0.78	0.91	0.61	0.85	0.89	0.79	0.22	0.87	0.69	0.81	0.51	0.71	0.61	0.91	0.9	0.86	0.74	0.85	0.96	0.91	0.82
chr8	29167149	0.91	0.97	0.47	0.31	0.95	0.8	1.0	1.0	1.0	1.0	1.0	0.86	0.2	0.97	1.0	0.93	1.0	0.92	0.52	0.38	1.0	0.93	0.92	0.91	0.94	0.95	0.9	0.97	1.0	0.96	1.0	0.97	0.97	0.32	0.97	0.97	0.96	0.76	0.96	0.88	0.89	1.0	1.0	0.77	1.0	0.97	1.0	1.0
chr8	29180472	1.0	1.0	0.33	0.28	1.0	0.45	0.92	1.0	1.0	1.0	1.0	0.71	0.32	1.0	0.96	0.93	1.0	1.0	0.48	0.36	1.0	1.0	0.96	1.0	1.0	1.0	1.0	1.0	1.0	1.0	1.0	0.97	1.0	0.35	1.0	0.94	1.0	0.5	1.0	0.93	1.0	1.0	1.0	0.79	1.0	1.0	1.0	1.0
chr8	29202341	0.19	0.08	0.67	0.65	0.14	0.5	0.06	0.09	0.06	0.04	0.07	0.36	0.69	0.03	0.12	0.09	0.1	0.03	0.57	0.8	0.0	0.03	0.13	0.04	0.0	0.06	0.04	0.07	0.25	0.07	0.0	0.07	0.17	0.84	0.11	0.39	0.04	0.39	0.19	0.19	0.16	0.06	0.19	0.3	0.1	0.0	0.05	0.15
chr8	29242530	1.0	0.94	0.61	0.44	1.0	0.5	0.93	1.0	1.0	0.96	0.92	0.68	0.16	0.92	0.93	0.94	1.0	0.87	0.65	0.5	0.97	1.0	1.0	1.0	0.9	0.9	1.0	1.0	1.0	0.97	1.0	1.0	0.97	0.18	0.97	0.89	0.91	0.54	0.91	0.94	1.0	1.0	1.0	0.73	0.97	1.0	0.97	1.0
chr8	29269932	0.87	0.85	0.41	0.32	1.0	0.41	0.92	0.87	0.81	0.53	0.85	0.53	0.38	0.82	0.73	0.67	0.89	0.81	0.5	0.46	0.73	1.0	0.81	0.92	0.81	0.93	0.81	0.86	1.0	0.86	0.92	0.97	0.9	0.05	0.94	0.81	0.9	0.57	0.89	0.81	0.79	0.83	1.0	0.57	0.86	1.0	0.73	0.88
chr8	29312717	1.0	0.97	0.41	0.23	1.0	0.57	0.97	1.0	0.96	1.0	1.0	0.67	0.15	0.97	0.86	0.79	1.0	1.0	0.5	0.48	1.0	0.88	0.79	1.0	1.0	1.0	0.97	0.98	0.95	1.0	0.89	1.0	1.0	0.12	0.92	1.0	0.88	0.56	0.91	0.93	1.0	1.0	1.0	0.59	1.0	1.0	0.94	1.0
chr8	29379487	0.72	0.73	0.32	0.09	0.62	0.22	0.61	0.82	0.53	0.52	0.84	0.46	0.1	0.8	0.73	0.69	0.71	0.75	0.27	0.33	0.66	0.73	0.75	0.67	0.62	0.75	0.62	0.85	0.81	0.69	0.89	0.65	0.75	0.12	0.85	0.82	0.7	0.31	0.71	0.62	0.77	0.67	0.78	0.37	0.73	0.8	0.82	0.66
chr8	29419402	0.83	0.79	0.3	0.23	0.95	0.45	0.83	0.89	0.88	0.9	0.86	0.69	0.19	0.75	0.81	0.9	0.8	0.89	0.5	0.37	0.87	0.79	0.71	0.52	0.86	0.83	0.79	0.8	0.82	0.86	0.94	0.89	0.81	0.15	0.76	0.84	0.88	0.47	0.79	0.84	0.77	0.79	0.93	0.61	0.89	0.72	0.86	0.83
chr8	29456336	0.67	0.67	0.26	0.07	0.94	0.2	0.74	0.54	0.71	0.69	0.83	0.46	0.24	0.66	0.6	0.57	0.72	0.77	0.39	0.19	0.71	0.76	0.63	0.74	0.48	0.71	0.74	0.72	0.79	0.55	0.92	0.81	0.57	0.04	0.75	0.67	0.75	0.66	0.69	0.55	0.68	0.55	0.68	0.49	0.89	0.75	0.68	0.71
chr8	29515204	0.81	0.94	0.33	0.42	0.86	0.52	0.91	0.85	0.94	0.96	0.69	0.65	0.21	0.95	0.84	0.72	0.89	0.82	0.45	0.31	0.94	0.92	0.79	0.93	0.79	0.91	0.86	0.85	0.79	0.82	0.91	0.91	1.0	0.12	0.89	0.81	0.87	0.6	0.84	0.69	0.87	0.94	1.0	0.73	0.87	0.68	0.95	0.89
chr8	29544566	1.0	1.0	0.54	0.27	1.0	0.5	1.0	1.0	1.0	1.0	1.0	0.68	0.16	0.97	0.97	0.83	1.0	0.97	0.43	0.43	0.96	1.0	0.93	1.0	1.0	1.0	1.0	1.0	1.0	1.0	1.0	1.0	1.0	0.25	0.98	0.94	1.0	0.69	1.0	0.93	1.0	1.0	1.0	0.88	1.0	1.0	1.0	0.97
chr8	29757077	0.7	0.69	0.44	0.23	0.78	0.28	0.66	0.77	0.83	0.76	0.92	0.49	0.16	0.68	0.79	0.81	0.87	0.91	0.32	0.39	0.88	0.79	0.83	0.92	0.84	0.82	0.84	0.86	0.85	0.82	0.85	0.84	0.7	0.04	0.75	0.75	0.95	0.56	0.83	0.74	0.81	0.8	0.92	0.67	0.86	0.86	0.88	0.97
chr8	29853323	0.23	0.31	1.0	1.0	0.87	0.92	0.96	0.29	0.75	0.58	0.22	0.9	1.0	0.88	0.81	0.88	0.23	0.88	0.75	0.96	0.81	0.41	0.8	0.81	0.79	0.32	0.32	0.23	0.45	0.53	0.43	0.43	0.64	1.0	0.33	0.32	0.33	0.81	0.68	0.68	0.29	0.22	0.23	0.91	0.23	0.18	0.25	0.4
chr8	29876650	0.97	0.85	0.25	0.35	1.0	0.65	0.96	0.9	0.97	0.68	0.95	0.77	0.4	0.74	0.81	0.84	0.95	0.92	0.5	0.33	1.0	0.85	0.97	1.0	0.91	0.91	0.95	0.97	1.0	0.94	1.0	0.97	0.86	0.32	0.95	0.92	1.0	0.65	0.95	0.83	1.0	0.96	1.0	0.59	0.83	0.97	0.94	1.0
chr8	30269611	0.39	0.33	0.72	0.8	0.18	0.39	0.24	0.26	0.22	0.11	0.05	0.55	0.86	0.14	0.26	0.28	0.13	0.14	0.54	0.81	0.08	0.13	0.21	0.13	0.2	0.24	0.11	0.26	0.13	0.21	0.16	0.18	0.23	0.74	0.39	0.19	0.28	0.54	0.13	0.13	0.2	0.23	0.07	0.35	0.26	0.22	0.1	0.17
chr8	30361144	0.95	0.92	0.21	0.46	0.84	0.62	0.9	1.0	0.89	0.77	0.92	0.76	0.17	0.85	0.86	0.81	0.92	0.72	0.68	0.52	0.89	0.92	0.95	0.91	0.92	0.92	0.83	0.78	1.0	0.93	1.0	0.88	0.76	0.17	0.93	0.87	0.95	0.45	0.96	0.89	0.9	0.92	0.89	0.67	0.89	0.93	0.96	0.95
chr8	30389584	0.62	0.83	0.38	0.1	0.47	0.5	0.47	0.67	0.8	0.71	0.71	0.58	0.04	0.78	0.86	0.86	0.75	0.7	0.45	0.27	0.61	0.89	0.65	0.69	0.66	0.68	0.81	0.56	0.8	0.67	0.89	0.65	0.74	0.04	0.59	0.62	0.81	0.35	0.79	0.81	0.83	0.65	0.74	0.55	0.65	0.64	0.62	0.69
chr8	30618252	1.0	1.0	0.4	0.43	1.0	0.47	0.97	1.0	1.0	0.96	1.0	0.62	0.43	1.0	1.0	0.9	1.0	0.97	0.72	0.46	0.96	1.0	0.93	1.0	0.97	0.95	1.0	1.0	1.0	1.0	1.0	1.0	1.0	0.23	0.97	1.0	1.0	0.65	1.0	1.0	0.95	1.0	1.0	0.74	1.0	1.0	1.0	1.0
chr8	30710703	0.96	1.0	0.34	0.36	1.0	0.53	1.0	0.95	0.92	0.91	1.0	0.7	0.36	0.93	0.96	0.87	0.94	0.89	0.5	0.21	0.92	1.0	0.83	0.92	0.94	0.91	0.88	0.9	1.0	0.91	1.0	0.9	0.94	0.0	0.88	1.0	1.0	0.36	0.92	0.91	1.0	0.9	0.94	0.75	0.94	1.0	1.0	0.86
chr9	8808863	0.47	0.41	0.82	0.97	0.91	0.91	0.94	0.61	0.82	0.26	0.65	0.96	0.96	0.94	0.83	0.94	0.55	0.92	0.88	0.93	0.96	0.64	0.92	0.85	0.76	0.57	0.53	0.71	0.33	0.26	0.4	0.38	0.59	1.0	0.68	0.7	0.5	0.86	0.7	0.65	0.54	0.54	0.41	0.97	0.58	0.67	0.6	0.59
chr9	8827747	0.22	0.55	0.88	0.87	0.63	0.76	0.83	0.42	0.94	0.22	0.54	0.94	0.77	0.85	0.84	0.85	0.51	0.88	0.88	0.87	0.95	0.48	0.71	0.79	0.89	0.48	0.58	0.55	0.5	0.27	0.38	0.45	0.76	0.89	0.62	0.7	0.48	0.82	0.84	0.78	0.41	0.73	0.52	0.93	0.48	0.69	0.61	0.54
chr9	8928060	0.93	0.71	0.53	0.43	0.71	0.44	0.58	0.81	0.34	0.61	0.77	0.28	0.59	0.16	0.26	0.41	0.49	0.38	0.41	0.36	0.35	0.54	0.4	0.08	0.24	0.74	0.78	0.72	0.86	0.63	0.56	0.62	0.28	0.22	0.59	0.54	0.43	0.31	0.33	0.5	0.76	0.84	0.65	0.33	0.73	0.65	0.67	0.79
chr9	8950813	0.74	0.75	0.47	0.48	0.55	0.72	0.65	0.85	0.12	0.55	0.53	0.32	0.35	0.25	0.25	0.27	0.66	0.31	0.28	0.32	0.26	0.37	0.56	0.19	0.14	0.53	0.75	0.71	0.73	0.5	0.5	0.58	0.33	0.12	0.55	0.48	0.36	0.29	0.38	0.33	0.8	0.74	0.73	0.29	0.63	0.81	0.73	0.81
chr9	8982089	0.72	0.88	0.64	0.47	0.76	0.67	0.87	0.74	0.22	0.88	0.59	0.41	0.26	0.36	0.25	0.27	0.65	0.32	0.5	0.52	0.37	0.59	0.52	0.15	0.21	0.67	0.68	0.8	0.86	0.91	0.89	0.75	0.47	0.52	0.63	0.81	0.9	0.35	0.5	0.41	0.67	0.76	0.79	0.48	0.78	0.71	0.83	0.81
chr9	9052573	0.85	0.72	0.56	0.5	0.79	0.41	0.81	0.84	0.19	1.0	0.67	0.2	0.24	0.24	0.29	0.38	0.84	0.16	0.24	0.17	0.15	0.52	0.27	0.18	0.14	0.73	0.62	0.66	0.65	0.81	0.88	0.89	0.55	0.41	0.53	0.8	0.75	0.25	0.42	0.44	0.89	0.83	0.95	0.18	0.72	0.85	0.84	0.68
chr9	9106577	0.63	0.82	0.66	0.76	0.68	0.53	0.64	0.75	0.33	0.93	0.67	0.42	0.22	0.38	0.54	0.32	0.65	0.38	0.29	0.42	0.48	0.68	0.26	0.39	0.28	0.81	0.6	0.61	0.87	0.88	0.92	0.88	0.39	0.5	0.55	0.86	0.71	0.32	0.52	0.36	0.89	0.82	0.95	0.38	0.79	0.83	0.85	0.61
chr9	9604181	0.56	0.75	0.93	0.97	0.9	0.96	0.9	0.73	0.91	0.35	0.81	0.94	1.0	0.86	1.0	0.83	0.64	0.93	1.0	1.0	1.0	0.68	0.88	1.0	0.94	0.64	0.65	0.68	0.19	0.38	0.44	0.45	0.74	1.0	0.88	0.74	0.77	0.97	0.71	0.77	0.43	0.74	0.61	0.92	0.54	0.88	0.8	0.79
chr9	14231984	0.79	0.94	0.47	0.73	0.73	0.6	0.6	0.83	0.42	0.28	0.82	0.55	0.3	0.3	0.21	0.44	0.74	0.4	0.5	0.31	0.61	0.69	0.75	0.84	0.86	0.74	0.82	0.81	0.52	0.57	0.37	0.81	0.48	0.33	0.69	0.74	0.67	0.16	0.61	0.57	0.77	0.76	0.83	0.47	0.86	0.97	0.89	0.84
chr9	14250859	0.61	0.72	0.34	0.38	0.56	0.33	0.39	0.75	0.03	0.15	0.57	0.31	0.12	0.1	0.05	0.19	0.62	0.2	0.14	0.13	0.17	0.43	0.55	0.69	0.62	0.68	0.76	0.54	0.34	0.39	0.38	0.47	0.19	0.05	0.5	0.4	0.48	0.08	0.61	0.44	0.77	0.68	0.85	0.22	0.68	0.65	0.68	0.53
chr9	17176210	0.03	0.12	0.62	0.53	0.79	0.58	0.69	0.03	0.61	0.54	0.07	0.62	0.84	0.73	0.67	0.81	0.11	0.73	0.58	0.75	0.79	0.47	0.66	0.52	0.56	0.06	0.17	0.28	0.58	0.48	0.39	0.34	0.32	0.71	0.16	0.39	0.52	0.69	0.66	0.73	0.0	0.06	0.1	0.58	0.08	0.12	0.07	0.25
chr9	17192515	0.97	0.93	0.4	0.41	0.68	0.41	0.59	0.95	0.58	0.63	0.84	0.49	0.5	0.38	0.31	0.36	0.94	0.48	0.6	0.42	0.46	0.59	0.49	0.48	0.47	0.93	0.94	0.77	0.79	0.58	0.81	0.88	0.54	0.52	0.83	0.73	0.46	0.4	0.44	0.66	0.9	0.78	0.93	0.54	0.81	0.92	0.86	0.85
chr9	17230493	0.23	0.19	0.58	0.55	0.59	0.42	0.5	0.09	0.45	0.4	0.35	0.73	0.68	0.68	0.44	0.62	0.07	0.56	0.62	0.45	0.46	0.55	0.53	0.58	0.68	0.15	0.11	0.17	0.25	0.26	0.3	0.24	0.45	0.71	0.32	0.39	0.55	0.29	0.59	0.4	0.03	0.11	0.13	0.38	0.1	0.3	0.1	0.18
chr9	17249033	0.52	0.4	0.86	0.97	0.67	0.93	0.95	0.32	0.72	1.0	0.56	0.89	0.85	0.91	0.74	0.83	0.38	0.91	0.85	0.76	0.87	0.93	0.85	0.93	0.88	0.42	0.48	0.5	0.75	0.86	0.76	0.69	0.69	0.88	0.35	0.73	0.9	0.64	0.97	0.82	0.51	0.3	0.33	0.82	0.39	0.24	0.26	0.45
chr9	17265077	0.48	0.19	0.67	0.74	0.9	0.8	0.67	0.35	0.83	0.74	0.57	0.75	0.88	0.76	0.8	0.91	0.33	0.62	0.79	0.83	0.68	0.74	0.92	0.61	0.59	0.3	0.38	0.34	0.95	0.67	0.5	0.58	0.88	0.61	0.32	0.69	0.67	0.83	0.68	0.68	0.26	0.27	0.22	0.94	0.41	0.19	0.28	0.24
chr9	17279336	0.6	0.31	0.92	0.97	0.94	0.96	0.82	0.33	0.88	0.89	0.56	0.87	0.96	0.88	1.0	0.97	0.51	0.79	0.93	1.0	1.0	0.94	0.91	1.0	0.94	0.4	0.53	0.55	0.95	0.93	0.88	0.74	0.97	0.96	0.58	0.78	1.0	0.88	0.98	0.91	0.33	0.68	0.38	0.89	0.35	0.42	0.3	0.39
chr9	21865367	0.3	0.48	0.8	0.71	0.6	0.71	0.62	0.41	0.81	0.81	0.79	0.89	0.86	0.82	0.77	0.57	0.77	0.77	0.9	0.93	0.74	0.88	0.84	0.93	0.87	0.72	0.71	0.75	0.8	0.74	0.7	0.73	0.93	0.81	0.55	0.27	0.81	0.55	0.48	0.32	0.48	0.47	0.5	0.35	0.32	0.24	0.46	0.31
chr9	28356946	0.83	0.95	0.28	0.46	0.5	0.67	0.46	0.8	0.18	0.88	0.83	0.54	0.45	0.5	0.6	0.61	0.97	0.31	0.38	0.39	0.44	0.74	0.74	0.56	0.5	0.92	0.91	0.97	0.88	0.89	0.85	0.88	0.61	0.56	0.83	0.9	0.7	0.54	0.67	0.76	0.92	0.93	0.89	0.57	0.81	0.79	0.84	0.92
chr9	28393615	0.8	0.71	0.58	0.46	0.59	0.42	0.38	0.92	0.39	0.73	0.96	0.41	0.15	0.39	0.47	0.32	0.81	0.37	0.3	0.39	0.61	0.79	0.48	0.5	0.41	0.82	0.85	0.84	0.74	0.78	0.84	0.88	0.6	0.35	0.68	0.78	0.85	0.39	0.59	0.56	0.84	0.94	0.82	0.44	0.78	0.89	0.73	0.77
chr9	28523903	0.54	0.38	0.1	0.0	0.07	0.06	0.04	0.68	0.03	0.6	0.39	0.0	0.0	0.09	0.0	0.0	0.53	0.0	0.04	0.06	0.05	0.27	0.03	0.03	0.05	0.68	0.48	0.4	0.5	0.52	0.53	0.41	0.24	0.0	0.33	0.53	0.38	0.07	0.18	0.25	0.5	0.71	0.61	0.04	0.63	0.75	0.33	0.38
chr10	3595537	0.25	0.15	0.81	1.0	0.82	0.67	0.92	0.24	0.37	0.29	0.75	0.88	0.82	0.72	0.79	0.74	0.12	0.73	0.81	0.63	0.52	0.06	0.56	0.58	0.54	0.19	0.35	0.4	0.03	0.22	0.18	0.21	0.66	1.0	0.74	0.14	0.07	0.63	0.64	0.7	0.07	0.64	0.03	0.97	0.33	0.13	0.11	0.59
chr10	7027668	0.59	0.59	0.03	0.07	0.82	0.11	0.85	0.62	0.23	0.6	0.3	0.38	0.09	0.35	0.18	0.15	0.78	0.22	0.23	0.36	0.52	0.62	0.62	0.79	0.74	0.77	0.23	0.33	0.33	0.45	0.67	0.58	0.68	0.2	0.44	0.43	0.81	0.17	0.53	0.41	0.59	0.68	0.79	0.5	0.8	0.88	0.82	0.33
chr10	9769478	0.58	0.73	0.67	0.57	0.45	0.59	0.67	0.76	0.07	0.58	0.29	0.19	0.07	0.03	0.12	0.44	0.51	0.3	0.12	0.27	0.26	0.57	0.53	0.39	0.28	0.65	0.66	0.58	0.64	0.36	0.19	0.6	0.15	0.43	0.38	0.37	0.54	0.12	0.31	0.39	0.78	0.65	0.68	0.31	0.57	0.57	0.66	0.5
chr10	9964568	0.85	1.0	0.42	0.52	0.61	0.62	0.55	0.81	0.09	0.54	0.79	0.44	0.27	0.13	0.21	0.24	0.75	0.31	0.21	0.19	0.38	0.68	0.5	0.52	0.44	0.81	0.75	0.78	0.67	0.57	0.83	0.81	0.84	0.5	0.62	0.63	0.58	0.37	0.63	0.54	0.77	0.88	0.75	0.26	0.83	0.85	0.95	0.75
chr10	10752625	0.39	0.53	0.93	0.9	0.94	1.0	0.83	0.13	0.8	0.5	0.58	0.95	0.93	1.0	0.81	0.91	0.62	0.76	0.97	0.9	0.83	0.78	0.85	0.86	0.82	0.53	0.54	0.44	0.61	0.62	0.82	0.75	0.79	1.0	0.59	0.83	0.79	0.88	0.69	0.83	0.43	0.52	0.43	0.82	0.56	0.54	0.36	0.59
chr10	14215958	0.97	0.94	0.62	0.66	0.75	0.83	0.68	1.0	0.42	0.88	0.82	0.83	0.47	0.56	0.5	0.52	0.93	0.54	0.5	0.34	0.73	0.64	0.44	0.37	0.34	0.98	0.9	0.93	0.62	0.5	0.54	0.59	0.46	0.89	0.74	0.47	0.65	0.48	0.77	0.53	1.0	0.96	0.84	0.85	0.94	0.96	0.97	0.88
chr10	18909154	0.97	0.98	0.8	0.68	0.52	0.79	0.58	0.96	0.32	0.42	0.22	0.52	0.5	0.52	0.57	0.53	0.48	0.5	0.58	0.47	0.68	0.37	0.59	0.64	0.44	0.51	0.39	0.42	0.45	0.38	0.54	0.52	0.49	0.52	0.81	0.97	0.74	0.9	0.94	0.94	0.91	0.93	0.9	0.97	0.96	1.0	0.96	0.8
chr10	20816381	0.46	0.31	0.84	0.97	0.95	0.93	0.9	0.57	0.9	0.57	0.91	0.89	0.92	0.85	0.95	0.89	0.46	0.84	0.93	0.92	0.96	0.7	0.87	0.94	0.95	0.5	0.68	0.73	0.43	0.43	0.33	0.66	0.7	0.88	0.78	0.56	0.65	0.95	0.69	0.77	0.54	0.57	0.59	0.97	0.44	0.48	0.54	0.75
chr10	20832068	0.8	0.41	1.0	1.0	1.0	1.0	1.0	0.58	0.96	0.65	0.95	1.0	0.93	1.0	1.0	1.0	0.48	1.0	1.0	1.0	1.0	0.85	1.0	1.0	0.97	0.55	0.84	0.81	0.79	0.53	0.71	0.52	0.62	1.0	0.89	0.61	0.57	1.0	0.83	0.72	0.41	0.54	0.59	1.0	0.51	0.74	0.51	0.96
chr10	20909314	0.71	0.62	1.0	1.0	1.0	1.0	1.0	0.5	0.97	0.55	0.79	1.0	1.0	1.0	1.0	1.0	0.49	1.0	1.0	1.0	0.94	0.86	0.97	1.0	1.0	0.4	0.78	0.9	0.51	0.58	0.68	0.51	0.68	1.0	0.86	0.42	0.48	1.0	0.88	0.69	0.4	0.69	0.62	1.0	0.63	0.69	0.52	0.93
chr10	20937103	0.55	0.39	1.0	1.0	1.0	1.0	1.0	0.33	1.0	0.57	0.91	1.0	1.0	1.0	1.0	1.0	0.41	1.0	1.0	0.97	1.0	0.82	0.94	1.0	1.0	0.48	0.71	0.8	0.63	0.74	0.58	0.66	0.68	1.0	0.97	0.71	0.78	1.0	0.93	0.84	0.27	0.62	0.68	1.0	0.61	0.72	0.77	0.97
chr10	20990747	0.72	0.65	1.0	1.0	1.0	1.0	1.0	0.64	0.97	0.26	0.92	1.0	1.0	0.97	1.0	1.0	0.57	1.0	1.0	1.0	1.0	0.69	0.92	1.0	1.0	0.52	0.78	0.84	0.33	0.44	0.6	0.44	0.69	1.0	0.95	0.53	0.5	1.0	0.88	0.88	0.59	0.67	0.75	1.0	0.68	0.69	0.76	0.94
chr10	21156000	0.35	0.17	0.0	0.0	0.0	0.0	0.0	0.44	0.0	0.4	0.0	0.0	0.0	0.0	0.0	0.0	0.6	0.0	0.0	0.0	0.0	0.22	0.1	0.0	0.0	0.56	0.17	0.11	0.58	0.44	0.6	0.62	0.17	0.0	0.19	0.16	0.18	0.0	0.17	0.17	0.48	0.38	0.35	0.0	0.52	0.24	0.32	0.05
chr10	21177426	0.38	0.32	0.0	0.0	0.0	0.0	0.0	0.31	0.0	0.53	0.06	0.0	0.0	0.0	0.0	0.04	0.64	0.08	0.0	0.0	0.0	0.22	0.04	0.0	0.06	0.68	0.08	0.09	0.64	0.54	0.41	0.67	0.35	0.0	0.04	0.24	0.26	0.0	0.17	0.24	0.44	0.39	0.4	0.0	0.47	0.28	0.18	0.0
chr10	21199937	0.56	0.63	1.0	1.0	1.0	1.0	1.0	0.75	0.9	0.54	0.86	0.97	1.0	1.0	1.0	1.0	0.26	1.0	1.0	1.0	1.0	0.79	0.97	1.0	1.0	0.39	0.8	0.86	0.4	0.57	0.6	0.44	0.65	1.0	0.91	0.73	0.52	1.0	0.89	0.89	0.5	0.55	0.67	1.0	0.55	0.7	0.63	0.97
chr10	21334357	1.0	0.94	0.61	0.54	0.59	0.63	0.37	1.0	0.57	0.96	0.9	0.53	0.44	0.48	0.48	0.61	1.0	0.54	0.39	0.52	0.58	0.84	0.62	0.67	0.67	1.0	0.88	0.97	1.0	0.87	1.0	0.88	0.68	0.4	0.81	0.85	0.71	0.66	0.75	0.7	1.0	1.0	1.0	0.33	1.0	1.0	1.0	0.91
chr10	21451907	0.36	0.3	0.03	0.19	0.05	0.0	0.0	0.34	0.05	0.56	0.0	0.03	0.0	0.0	0.0	0.0	0.64	0.0	0.0	0.04	0.03	0.32	0.07	0.08	0.0	0.74	0.17	0.18	0.54	0.56	0.58	0.47	0.25	0.0	0.07	0.39	0.41	0.0	0.32	0.27	0.47	0.13	0.25	0.06	0.52	0.5	0.32	0.0
chr10	21581054	0.45	0.43	0.0	0.0	0.0	0.0	0.0	0.51	0.0	0.46	0.13	0.0	0.0	0.0	0.0	0.0	0.74	0.0	0.0	0.0	0.0	0.25	0.0	0.04	0.0	0.77	0.06	0.16	0.71	0.52	0.33	0.37	0.2	0.0	0.19	0.31	0.39	0.0	0.28	0.18	0.63	0.52	0.5	0.0	0.67	0.48	0.49	0.0
chr10	21668802	0.43	0.41	0.0	0.0	0.0	0.0	0.0	0.71	0.04	0.35	0.17	0.0	0.0	0.0	0.0	0.0	0.62	0.0	0.0	0.0	0.0	0.43	0.0	0.0	0.04	0.73	0.11	0.24	0.52	0.34	0.43	0.55	0.24	0.0	0.22	0.32	0.33	0.0	0.21	0.18	0.57	0.62	0.5	0.0	0.49	0.45	0.62	0.12
chr10	21735305	0.46	0.57	1.0	1.0	1.0	1.0	1.0	0.41	1.0	0.5	0.75	1.0	1.0	1.0	1.0	1.0	0.37	1.0	1.0	1.0	1.0	0.83	1.0	0.93	0.79	0.19	0.89	0.78	0.83	0.66	0.63	0.5	0.85	1.0	0.85	0.63	0.71	1.0	0.83	0.73	0.39	0.48	0.38	1.0	0.33	0.66	0.43	0.97
chr10	21785536	0.7	0.56	1.0	1.0	1.0	1.0	1.0	0.5	1.0	0.71	0.84	1.0	1.0	1.0	1.0	1.0	0.31	1.0	1.0	1.0	1.0	0.74	1.0	0.93	0.95	0.43	0.92	0.81	0.71	0.81	0.53	0.69	0.92	1.0	0.82	0.76	0.6	1.0	0.87	0.71	0.5	0.34	0.62	1.0	0.43	0.42	0.54	0.92
chr10	21827097	0.67	0.71	1.0	1.0	1.0	1.0	1.0	0.53	1.0	0.73	0.86	1.0	1.0	1.0	0.96	0.96	0.38	1.0	1.0	1.0	1.0	0.87	1.0	1.0	0.97	0.45	0.86	0.93	0.74	0.79	0.54	0.61	0.97	1.0	0.92	0.68	0.81	1.0	0.89	0.83	0.68	0.53	0.57	1.0	0.28	0.59	0.51	1.0
chr10	21996243	0.62	0.62	1.0	1.0	1.0	1.0	1.0	0.6	1.0	0.67	0.91	1.0	1.0	1.0	1.0	1.0	0.44	1.0	1.0	1.0	1.0	0.63	1.0	0.96	1.0	0.43	0.94	0.87	0.58	0.78	0.56	0.58	0.9	1.0	0.89	0.5	0.73	1.0	0.81	0.81	0.63	0.57	0.64	1.0	0.54	0.3	0.61	0.87
chr10	22018911	0.71	0.46	1.0	1.0	1.0	1.0	1.0	0.65	1.0	0.82	0.86	1.0	1.0	1.0	1.0	1.0	0.33	1.0	1.0	1.0	1.0	0.87	0.97	1.0	1.0	0.47	0.86	0.93	0.67	0.8	0.44	0.61	0.81	1.0	0.97	0.59	0.65	1.0	0.79	0.89	0.59	0.59	0.74	1.0	0.47	0.6	0.52	1.0
chr10	22038094	0.67	0.67	0.87	0.86	1.0	1.0	0.9	0.58	0.93	0.52	0.85	0.75	0.84	0.69	0.94	0.8	0.33	0.92	0.79	0.86	0.88	0.69	0.96	0.93	0.89	0.31	0.84	0.83	0.69	0.65	0.42	0.43	0.86	0.92	0.92	0.76	0.65	0.91	0.73	0.88	0.5	0.62	0.33	0.9	0.42	0.31	0.45	0.94
chr10	22050534	0.66	0.47	1.0	1.0	1.0	1.0	1.0	0.65	1.0	0.83	0.95	1.0	1.0	1.0	1.0	1.0	0.47	1.0	1.0	1.0	1.0	1.0	1.0	1.0	0.94	0.43	0.95	0.86	0.78	0.85	0.77	0.82	0.92	1.0	0.89	0.77	0.75	1.0	0.88	0.96	0.5	0.38	0.61	1.0	0.58	0.33	0.52	0.97
chr10	22103915	0.17	0.32	0.44	0.52	0.56	0.56	0.42	0.26	0.3	0.27	0.56	0.66	0.86	0.63	0.42	0.5	0.31	0.5	0.62	0.68	0.43	0.15	0.33	0.15	0.17	0.15	0.56	0.6	0.05	0.13	0.33	0.22	0.09	0.58	0.68	0.12	0.08	0.68	0.26	0.31	0.33	0.22	0.16	0.59	0.36	0.12	0.23	0.47
chr10	22166872	0.34	0.72	0.11	0.07	0.05	0.04	0.17	0.63	0.0	0.19	0.22	0.19	0.21	0.09	0.0	0.17	0.46	0.26	0.13	0.12	0.0	0.25	0.15	0.09	0.06	0.37	0.43	0.3	0.44	0.3	0.65	0.29	0.35	0.2	0.2	0.16	0.42	0.05	0.32	0.2	0.63	0.78	0.75	0.07	0.24	0.58	0.58	0.23
chr10	22195186	0.63	0.31	1.0	1.0	1.0	1.0	1.0	0.56	1.0	0.55	0.83	1.0	1.0	1.0	1.0	1.0	0.71	1.0	1.0	1.0	1.0	0.73	1.0	0.97	1.0	0.6	0.88	0.88	0.55	0.93	0.46	0.66	0.89	1.0	0.9	0.67	0.58	1.0	0.93	0.8	0.53	0.61	0.38	1.0	0.6	0.45	0.45	1.0
chr10	23628612	0.04	0.03	0.46	0.42	0.65	0.58	0.33	0.13	0.65	0.32	0.28	0.64	0.61	0.73	0.48	0.61	0.27	0.61	0.67	0.53	0.58	0.44	0.53	0.62	0.58	0.38	0.15	0.33	0.33	0.29	0.35	0.13	0.36	0.91	0.43	0.28	0.48	0.68	0.39	0.61	0.07	0.38	0.15	0.72	0.17	0.09	0.07	0.34
chr10	25008722	0.69	0.39	1.0	1.0	1.0	1.0	1.0	0.59	1.0	0.64	1.0	1.0	1.0	1.0	1.0	1.0	0.45	1.0	1.0	1.0	1.0	0.85	0.93	1.0	1.0	0.46	0.84	0.87	0.66	0.59	0.54	0.55	0.85	1.0	0.89	0.89	0.86	1.0	0.86	0.87	0.57	0.5	0.44	1.0	0.46	0.59	0.45	0.89
chr10	25706327	0.57	0.6	0.0	0.0	0.0	0.0	0.0	0.48	0.0	0.42	0.12	0.03	0.0	0.0	0.04	0.0	0.59	0.0	0.0	0.0	0.0	0.31	0.14	0.07	0.03	0.56	0.21	0.27	0.47	0.27	0.39	0.2	0.36	0.0	0.25	0.32	0.72	0.0	0.09	0.19	0.28	0.47	0.35	0.0	0.16	0.47	0.23	0.14
chr10	25722725	0.55	0.44	0.14	0.29	0.07	0.07	0.3	0.31	0.2	0.74	0.36	0.27	0.11	0.32	0.24	0.2	0.71	0.25	0.05	0.11	0.55	0.5	0.62	0.45	0.48	0.55	0.42	0.31	0.53	0.62	0.8	0.4	0.58	0.32	0.37	0.3	0.74	0.16	0.33	0.39	0.68	0.43	0.59	0.0	0.44	0.31	0.43	0.17
chr10	25914543	0.22	0.38	0.13	0.04	0.12	0.07	0.09	0.47	0.09	0.54	0.24	0.07	0.19	0.07	0.09	0.0	0.41	0.23	0.11	0.05	0.13	0.37	0.33	0.2	0.3	0.28	0.09	0.39	0.76	0.55	0.6	0.59	0.68	0.1	0.2	0.5	0.35	0.05	0.58	0.36	0.43	0.53	0.33	0.1	0.16	0.19	0.27	0.14
chr10	25965957	0.06	0.18	0.0	0.0	0.0	0.0	0.0	0.21	0.0	0.5	0.08	0.04	0.0	0.0	0.0	0.0	0.24	0.0	0.0	0.0	0.0	0.18	0.1	0.09	0.25	0.25	0.07	0.08	0.79	0.7	0.61	0.52	0.47	0.0	0.0	0.5	0.43	0.0	0.34	0.24	0.17	0.39	0.25	0.0	0.14	0.06	0.16	0.0
chr10	26093593	0.31	0.26	0.03	0.0	0.0	0.0	0.0	0.33	0.0	0.5	0.31	0.03	0.0	0.0	0.0	0.0	0.46	0.0	0.04	0.07	0.0	0.44	0.19	0.24	0.2	0.26	0.11	0.15	0.54	0.65	0.42	0.56	0.53	0.0	0.3	0.55	0.37	0.0	0.21	0.26	0.48	0.33	0.5	0.0	0.41	0.38	0.51	0.1
chr10	26114674	0.46	0.14	0.06	0.0	0.1	0.05	0.0	0.37	0.0	0.61	0.26	0.1	0.0	0.04	0.0	0.03	0.56	0.0	0.05	0.12	0.11	0.44	0.32	0.14	0.03	0.35	0.24	0.22	0.62	0.65	0.15	0.48	0.67	0.19	0.35	0.57	0.5	0.08	0.26	0.4	0.42	0.26	0.57	0.0	0.5	0.41	0.33	0.27
chr10	26138929	0.47	0.39	0.0	0.04	0.12	0.0	0.04	0.55	0.0	0.54	0.12	0.09	0.0	0.07	0.0	0.0	0.61	0.06	0.0	0.03	0.0	0.27	0.38	0.07	0.3	0.42	0.29	0.18	0.38	0.52	0.42	0.44	0.43	0.04	0.23	0.53	0.61	0.0	0.31	0.26	0.6	0.51	0.33	0.0	0.37	0.41	0.44	0.22
chr10	26156825	0.29	0.31	0.03	0.0	0.0	0.04	0.05	0.45	0.07	0.32	0.08	0.03	0.04	0.0	0.0	0.0	0.5	0.0	0.03	0.0	0.05	0.44	0.09	0.05	0.09	0.38	0.24	0.25	0.53	0.38	0.17	0.53	0.3	0.0	0.25	0.32	0.48	0.0	0.15	0.35	0.56	0.59	0.59	0.03	0.5	0.55	0.46	0.21
chr10	26181612	0.41	0.35	0.0	0.0	0.0	0.0	0.0	0.37	0.0	0.37	0.24	0.0	0.0	0.0	0.0	0.0	0.56	0.0	0.0	0.0	0.0	0.22	0.1	0.13	0.14	0.46	0.29	0.32	0.38	0.34	0.24	0.3	0.39	0.0	0.24	0.15	0.27	0.0	0.08	0.17	0.42	0.39	0.42	0.0	0.56	0.73	0.59	0.0
chr10	26822133	0.59	0.5	0.97	1.0	1.0	1.0	0.96	0.79	1.0	0.83	0.64	0.95	1.0	1.0	0.92	1.0	0.55	0.96	1.0	1.0	0.97	0.7	0.81	0.68	0.91	0.35	0.6	0.6	0.83	0.63	0.77	0.69	0.72	0.9	0.62	0.81	0.66	0.87	0.86	0.91	0.37	0.5	0.34	0.97	0.46	0.46	0.49	0.56
chr10	28287530	0.94	0.92	0.91	0.93	0.94	0.85	0.9	0.85	0.94	0.12	0.86	0.95	0.81	0.94	0.92	1.0	0.59	0.81	0.84	0.97	0.97	0.37	0.81	0.88	0.76	0.48	0.83	0.85	0.0	0.07	0.0	0.0	0.52	0.9	0.82	0.21	0.35	0.93	0.62	0.68	0.68	0.72	0.92	0.93	0.78	0.76	0.87	0.81
chr10	28331593	0.06	0.26	0.0	0.0	0.0	0.0	0.0	0.1	0.0	0.96	0.22	0.0	0.0	0.0	0.04	0.04	0.35	0.0	0.0	0.0	0.0	0.6	0.06	0.0	0.0	0.29	0.06	0.24	0.96	0.93	1.0	0.86	0.23	0.0	0.1	0.72	0.58	0.0	0.21	0.28	0.27	0.2	0.14	0.0	0.16	0.16	0.17	0.0
chr10	28356884	0.07	0.12	0.0	0.0	0.0	0.0	0.0	0.12	0.0	0.81	0.09	0.0	0.0	0.0	0.0	0.0	0.47	0.0	0.0	0.0	0.0	0.43	0.08	0.0	0.0	0.42	0.16	0.16	1.0	0.96	0.96	0.87	0.27	0.0	0.16	0.83	0.6	0.0	0.37	0.19	0.26	0.08	0.22	0.0	0.04	0.33	0.26	0.08
chr10	28380913	0.24	0.31	0.33	0.46	0.35	0.33	0.38	0.26	0.48	0.92	0.38	0.31	0.5	0.24	0.29	0.43	0.44	0.41	0.33	0.45	0.43	0.71	0.42	0.19	0.25	0.45	0.43	0.35	1.0	0.94	0.91	0.97	0.7	0.4	0.52	0.77	0.85	0.52	0.65	0.47	0.46	0.48	0.38	0.37	0.29	0.38	0.47	0.31
chr10	28393156	0.26	0.38	0.11	0.07	0.0	0.04	0.08	0.15	0.1	0.74	0.14	0.05	0.0	0.07	0.0	0.03	0.42	0.04	0.1	0.06	0.1	0.49	0.03	0.08	0.05	0.54	0.35	0.21	0.79	0.83	0.7	0.76	0.17	0.07	0.24	0.66	0.64	0.13	0.33	0.37	0.36	0.62	0.39	0.19	0.37	0.36	0.29	0.08
chr11	3108575	0.38	0.39	0.95	0.92	0.95	0.9	0.86	0.33	0.94	0.67	0.78	0.9	0.85	1.0	0.96	0.85	0.49	0.78	0.85	0.97	0.97	0.79	0.76	0.78	0.83	0.48	0.83	0.76	0.65	0.69	0.5	0.55	0.77	0.88	0.83	0.54	0.96	0.89	0.79	0.9	0.31	0.4	0.53	0.72	0.51	0.48	0.36	0.81
chr11	3142360	0.21	0.33	0.62	0.68	0.83	0.79	0.72	0.27	0.81	0.62	0.67	0.81	0.9	0.89	0.8	0.85	0.38	0.79	0.84	0.79	0.74	0.6	0.72	0.67	0.72	0.24	0.69	0.61	0.71	0.62	0.58	0.5	0.88	0.36	0.71	0.62	0.7	0.71	0.75	0.84	0.39	0.36	0.4	0.74	0.35	0.45	0.14	0.76
chr11	3156114	0.39	0.44	0.93	0.97	0.92	0.93	0.95	0.5	1.0	0.55	0.92	0.98	0.97	1.0	0.97	0.97	0.42	0.97	0.89	1.0	1.0	0.8	0.97	1.0	0.97	0.44	0.8	0.77	0.45	0.72	0.5	0.59	0.74	0.97	0.88	0.73	0.86	0.88	0.77	0.9	0.6	0.47	0.41	1.0	0.51	0.5	0.29	0.8
chr11	4570964	0.36	0.26	0.8	0.95	1.0	0.76	0.92	0.47	0.75	0.86	0.64	0.9	0.7	0.86	0.81	0.88	0.5	0.84	0.92	0.86	0.83	0.88	0.84	0.88	0.94	0.37	0.6	0.42	0.57	0.53	0.52	0.63	0.88	0.65	0.48	0.57	0.67	0.85	0.72	0.79	0.41	0.38	0.53	0.82	0.57	0.39	0.5	0.38
chr11	4604797	0.45	0.49	0.91	0.91	1.0	0.84	0.91	0.42	1.0	0.91	0.65	1.0	1.0	0.97	0.92	0.93	0.56	1.0	0.93	0.94	0.9	0.94	0.93	1.0	0.97	0.64	0.71	0.62	0.95	0.92	0.67	0.85	0.91	1.0	0.55	0.7	1.0	0.89	1.0	0.84	0.58	0.41	0.37	1.0	0.44	0.67	0.61	0.61
chr11	7353787	0.48	0.56	0.19	0.06	0.38	0.47	0.53	0.57	0.57	0.65	0.2	0.41	0.12	0.15	0.07	0.32	0.32	0.14	0.18	0.36	0.29	0.6	0.42	0.1	0.04	0.38	0.18	0.32	0.58	0.58	0.61	0.58	0.55	0.19	0.71	0.79	0.65	0.86	0.86	0.41	0.47	0.45	0.62	0.41	0.6	0.47	0.96	0.53
chr11	8852729	0.57	0.68	0.21	0.22	0.1	0.16	0.21	0.64	0.6	0.61	0.69	0.32	0.39	0.45	0.36	0.38	0.55	0.22	0.31	0.41	0.36	0.86	0.37	0.42	0.47	0.67	0.61	0.67	1.0	0.8	0.82	0.79	0.55	0.12	0.62	0.53	0.67	0.42	0.54	0.48	0.61	0.53	0.63	0.39	0.47	0.52	0.55	0.48
chr11	8874460	0.91	0.81	0.39	0.36	0.15	0.27	0.1	0.65	0.53	0.78	0.91	0.54	0.65	0.61	0.29	0.45	0.64	0.53	0.57	0.55	0.35	0.68	0.5	0.44	0.45	0.72	0.79	0.78	0.89	0.87	0.9	0.88	0.6	0.21	0.67	0.62	0.91	0.5	0.63	0.53	0.73	0.79	0.67	0.44	0.77	0.88	0.91	0.88
chr11	9354658	0.33	0.37	0.91	0.83	0.78	0.73	0.71	0.48	0.48	0.12	0.47	0.73	0.62	0.38	0.48	0.62	0.48	0.41	0.46	0.7	0.54	0.18	0.44	0.72	0.55	0.44	0.47	0.47	0.09	0.09	0.04	0.14	0.17	0.81	0.39	0.07	0.4	0.49	0.19	0.42	0.47	0.39	0.46	0.65	0.41	0.49	0.4	0.32
chr12	2272011	0.41	0.27	0.85	0.76	0.75	0.92	0.73	0.21	0.88	0.59	0.35	0.92	1.0	0.94	0.75	0.88	0.38	0.9	0.82	0.94	0.96	0.79	0.78	0.88	0.8	0.33	0.38	0.42	0.72	0.62	0.58	0.55	0.83	0.88	0.57	0.6	0.72	0.84	0.61	0.74	0.27	0.25	0.45	0.88	0.33	0.28	0.37	0.32
chr12	4778991	0.63	0.54	1.0	1.0	1.0	1.0	1.0	0.35	1.0	1.0	0.52	1.0	1.0	1.0	1.0	1.0	0.52	1.0	1.0	1.0	1.0	1.0	1.0	1.0	1.0	0.47	0.41	0.37	1.0	0.94	0.82	0.97	1.0	1.0	0.5	1.0	1.0	1.0	0.97	1.0	0.79	0.59	0.81	1.0	0.9	0.81	0.6	0.37
chr12	15294830	0.56	0.55	1.0	1.0	0.62	1.0	0.67	0.79	1.0	0.54	1.0	1.0	1.0	1.0	1.0	1.0	0.56	1.0	1.0	1.0	1.0	0.93	1.0	0.96	0.96	0.59	0.94	0.98	0.33	0.81	0.3	0.68	0.9	1.0	1.0	0.7	0.56	1.0	0.89	0.85	0.65	0.61	0.57	1.0	0.56	0.52	0.74	1.0
chr12	15306117	0.65	0.44	1.0	1.0	0.5	1.0	0.65	0.68	1.0	0.64	1.0	1.0	1.0	1.0	1.0	1.0	0.62	1.0	1.0	1.0	1.0	0.87	1.0	0.97	0.97	0.63	0.94	0.96	0.69	0.58	0.26	0.62	0.97	1.0	1.0	0.53	0.58	1.0	0.88	0.86	0.63	0.62	0.64	1.0	0.55	0.64	0.76	1.0
chr12	15334935	0.75	0.78	1.0	1.0	0.73	1.0	0.83	0.74	1.0	0.61	1.0	1.0	1.0	1.0	1.0	1.0	0.58	1.0	1.0	1.0	1.0	0.9	1.0	1.0	0.97	0.65	0.89	0.85	0.48	0.52	0.42	0.67	1.0	1.0	1.0	0.5	0.62	1.0	0.93	0.92	0.5	0.54	0.85	1.0	0.66	0.78	0.61	1.0
chr12	15410977	0.62	0.62	0.24	0.14	0.32	0.2	0.4	0.33	0.1	0.38	0.0	0.13	0.27	0.2	0.0	0.04	0.56	0.13	0.15	0.07	0.12	0.3	0.14	0.13	0.12	0.61	0.07	0.1	0.63	0.31	0.67	0.36	0.24	0.0	0.0	0.33	0.53	0.15	0.21	0.23	0.39	0.64	0.59	0.04	0.45	0.57	0.59	0.11
chr12	15815178	0.81	1.0	0.03	0.0	0.77	0.0	0.73	0.97	0.06	0.92	0.0	0.0	0.0	0.0	0.0	0.0	0.9	0.0	0.04	0.0	0.0	0.79	0.03	0.04	0.19	1.0	0.13	0.23	1.0	1.0	1.0	0.97	0.42	0.04	0.03	0.85	0.89	0.08	0.5	0.45	1.0	0.97	0.94	0.07	0.95	0.91	0.84	0.07
chr12	15850265	0.74	0.98	0.0	0.0	0.8	0.0	0.7	1.0	0.0	1.0	0.0	0.0	0.0	0.0	0.0	0.0	0.96	0.0	0.0	0.0	0.0	0.8	0.13	0.0	0.19	0.96	0.17	0.18	1.0	1.0	0.96	0.93	0.64	0.0	0.0	0.83	0.96	0.0	0.62	0.41	0.97	0.82	0.92	0.0	0.89	0.97	0.84	0.03
chr12	15877702	0.71	0.96	0.0	0.0	0.72	0.0	0.68	0.87	0.0	0.78	0.0	0.0	0.0	0.0	0.0	0.0	0.84	0.0	0.04	0.0	0.0	0.57	0.07	0.03	0.14	0.79	0.15	0.27	0.63	0.8	0.78	0.67	0.37	0.0	0.0	0.81	0.79	0.03	0.49	0.59	0.89	0.83	0.81	0.0	0.79	0.82	0.68	0.03
chr12	15917374	0.91	0.98	0.37	0.48	0.92	0.5	0.84	1.0	0.41	0.97	0.47	0.5	0.38	0.38	0.44	0.76	0.99	0.6	0.48	0.5	0.44	1.0	0.41	0.8	0.76	1.0	0.53	0.57	0.96	0.98	1.0	1.0	0.89	0.56	0.07	0.92	1.0	0.15	0.74	0.92	1.0	1.0	1.0	0.88	1.0	1.0	0.98	0.86
chr12	16001815	0.85	1.0	0.57	0.44	0.9	0.47	0.87	1.0	0.46	1.0	0.71	0.57	0.47	0.42	0.5	0.44	1.0	0.5	0.54	0.43	0.65	0.93	0.59	0.45	0.48	1.0	0.57	0.75	1.0	1.0	1.0	1.0	0.77	0.5	0.68	0.94	0.91	0.59	0.79	0.76	1.0	0.97	0.96	0.46	0.94	1.0	0.95	0.47
chr12	16165912	0.72	0.45	1.0	0.92	1.0	1.0	1.0	0.54	1.0	0.66	1.0	1.0	1.0	1.0	1.0	0.97	0.41	1.0	1.0	1.0	0.97	0.61	0.94	0.94	0.94	0.51	0.89	0.96	0.71	0.63	0.81	0.55	0.94	1.0	1.0	0.6	0.52	0.94	0.85	0.83	0.47	0.5	0.62	1.0	0.53	0.61	0.57	0.91
chr12	16179280	0.44	0.19	0.9	0.95	0.27	1.0	0.34	0.5	0.6	0.61	0.91	0.76	0.56	0.22	0.38	0.43	0.37	0.44	0.48	0.41	0.5	0.73	0.56	0.47	0.53	0.34	0.9	0.91	0.63	0.52	0.48	0.62	0.61	0.92	0.92	0.59	0.42	0.45	0.52	0.63	0.42	0.48	0.39	0.58	0.47	0.76	0.35	1.0
chr12	16209610	0.92	0.81	0.97	0.83	0.26	0.93	0.38	0.86	0.45	0.82	1.0	0.5	0.4	0.24	0.38	0.38	0.77	0.33	0.52	0.44	0.58	0.88	0.65	0.5	0.4	0.75	0.96	0.96	0.96	0.79	0.78	0.92	0.84	0.86	0.97	0.92	0.86	0.53	0.73	0.83	0.89	0.81	0.75	0.67	0.85	0.82	0.83	1.0
chr12	16249974	0.58	0.46	0.74	0.77	1.0	0.68	0.61	0.55	0.88	0.3	0.89	0.76	0.75	0.7	0.81	0.76	0.42	0.91	0.71	0.78	0.81	0.6	0.57	0.92	0.85	0.33	0.85	0.77	0.32	0.24	0.59	0.49	0.38	0.91	0.74	0.27	0.43	0.8	0.52	0.63	0.26	0.5	0.52	0.67	0.45	0.3	0.53	0.83
chr12	16265556	0.66	0.61	0.97	0.97	1.0	1.0	1.0	0.59	0.97	0.54	0.87	1.0	0.93	0.94	1.0	1.0	0.51	1.0	0.93	0.88	1.0	0.66	1.0	1.0	0.94	0.57	0.84	0.98	0.41	0.25	0.86	0.63	0.94	0.91	1.0	0.54	0.89	0.98	0.6	0.66	0.6	0.61	0.62	1.0	0.64	0.59	0.71	0.98
chr12	16477866	0.15	0.27	0.16	0.21	0.0	0.27	0.13	0.32	0.21	0.75	0.17	0.12	0.21	0.25	0.18	0.28	0.35	0.2	0.25	0.14	0.23	0.35	0.07	0.14	0.16	0.17	0.25	0.29	0.68	0.68	0.91	0.7	0.62	0.1	0.35	0.75	0.46	0.0	0.36	0.38	0.32	0.18	0.25	0.21	0.5	0.24	0.32	0.2
chr12	17824615	0.24	0.66	0.17	0.64	0.22	0.08	0.03	0.58	0.72	0.47	0.33	0.03	0.72	0.86	0.75	0.55	0.35	0.65	0.76	0.77	0.69	0.71	0.7	0.66	0.65	0.46	0.4	0.26	0.78	0.46	0.29	0.3	0.68	0.04	0.31	0.43	0.9	0.74	0.5	0.55	0.39	0.24	0.14	0.11	0.3	0.24	0.22	0.29
chr12	18043318	0.24	0.46	0.29	0.52	0.0	0.0	0.04	0.61	0.92	0.44	0.13	0.16	0.84	0.9	0.86	0.88	0.35	0.69	0.92	0.96	0.85	0.81	0.64	0.76	0.75	0.33	0.17	0.3	0.95	0.33	0.3	0.25	0.89	0.0	0.15	0.37	0.96	0.92	0.51	0.62	0.52	0.17	0.12	0.03	0.27	0.16	0.18	0.17
chr12	18907257	0.17	0.57	0.34	0.33	0.39	0.47	0.18	0.78	0.68	0.65	0.32	0.33	0.75	0.91	0.88	0.87	0.59	0.65	0.95	1.0	0.89	0.62	0.83	0.58	0.68	0.61	0.27	0.32	0.89	0.69	0.46	0.43	0.81	0.06	0.23	0.6	0.91	0.89	0.79	0.79	0.45	0.38	0.35	0.19	0.41	0.35	0.32	0.24
chr12	19044706	0.0	0.43	0.29	0.53	0.0	0.11	0.0	0.64	1.0	0.6	0.2	0.0	1.0	0.93	1.0	0.92	0.35	0.7	1.0	1.0	0.8	0.75	0.69	0.64	0.61	0.37	0.12	0.22	0.97	0.39	0.24	0.2	0.88	0.0	0.07	0.41	0.96	1.0	0.66	0.65	0.22	0.04	0.05	0.0	0.08	0.11	0.05	0.11
chr12	19192887	0.44	0.63	0.35	0.5	0.27	0.33	0.19	0.66	1.0	0.62	0.29	0.3	1.0	0.94	1.0	0.96	0.49	0.71	1.0	1.0	0.89	0.83	0.85	0.79	0.9	0.45	0.37	0.4	0.91	0.62	0.5	0.41	0.81	0.22	0.3	0.42	0.96	1.0	0.79	0.72	0.49	0.43	0.24	0.31	0.47	0.24	0.39	0.46
chr12	19213969	1.0	0.67	0.88	0.61	1.0	1.0	1.0	0.48	0.5	0.52	1.0	0.97	0.28	0.5	0.52	0.35	0.62	0.42	0.37	0.53	0.18	0.31	0.5	0.48	0.47	0.79	0.8	0.8	0.3	0.59	0.74	0.82	0.58	1.0	1.0	0.52	0.48	0.52	0.44	0.42	0.61	1.0	0.95	1.0	0.82	0.81	0.88	0.91
chr12	19252356	0.04	0.56	0.21	0.41	0.0	0.14	0.14	0.55	0.91	0.39	0.24	0.26	0.79	0.59	0.83	0.79	0.42	0.65	0.77	0.9	0.68	0.76	0.72	0.61	0.68	0.45	0.24	0.31	0.93	0.5	0.37	0.31	0.67	0.22	0.14	0.39	0.89	0.81	0.72	0.79	0.3	0.35	0.0	0.12	0.23	0.21	0.19	0.26
chr12	19288906	0.14	0.07	0.08	0.33	0.0	0.1	0.08	0.27	0.9	0.53	0.09	0.03	0.67	0.9	1.0	0.79	0.19	0.6	0.73	0.88	0.71	0.75	0.77	0.65	0.6	0.18	0.14	0.24	0.92	0.48	0.26	0.16	0.76	0.0	0.17	0.4	0.74	0.8	0.6	0.56	0.39	0.0	0.05	0.06	0.23	0.16	0.04	0.15
chr12	19438718	0.04	0.27	0.22	0.38	0.06	0.0	0.07	0.61	0.88	0.41	0.14	0.04	1.0	0.93	1.0	0.87	0.38	0.57	0.86	0.92	0.72	0.75	0.74	0.7	0.55	0.51	0.22	0.28	0.82	0.59	0.38	0.23	0.69	0.09	0.22	0.27	1.0	1.0	0.59	0.76	0.31	0.15	0.0	0.0	0.18	0.14	0.19	0.16
chr12	19450130	0.12	0.55	0.16	0.37	0.0	0.05	0.1	0.59	0.86	0.41	0.35	0.03	0.77	0.88	0.86	0.9	0.36	0.67	0.91	0.97	0.71	0.85	0.7	0.5	0.69	0.37	0.2	0.3	0.87	0.57	0.28	0.41	0.75	0.1	0.18	0.36	0.83	0.89	0.45	0.78	0.3	0.17	0.07	0.07	0.23	0.26	0.1	0.09
chr12	19532740	0.65	0.79	0.47	0.73	0.83	0.33	0.42	0.77	1.0	0.78	0.53	0.48	0.97	1.0	1.0	0.85	0.84	0.86	1.0	1.0	0.96	0.88	0.84	0.73	0.91	0.63	0.62	0.54	0.95	0.86	0.5	0.45	0.88	0.53	0.42	0.78	1.0	1.0	0.9	0.88	0.53	0.43	0.42	0.5	0.44	0.46	0.71	0.46
chr12	19547294	0.32	0.5	0.27	0.66	0.06	0.12	0.12	0.67	1.0	0.58	0.21	0.03	1.0	1.0	1.0	0.92	0.62	0.8	1.0	1.0	0.9	0.93	0.81	0.61	0.74	0.5	0.23	0.24	1.0	0.61	0.33	0.29	0.81	0.33	0.31	0.48	1.0	1.0	0.72	0.77	0.52	0.29	0.17	0.12	0.28	0.29	0.24	0.24
chr12	19664783	0.32	0.75	0.5	0.71	0.2	0.26	0.21	0.81	1.0	0.68	0.54	0.42	1.0	0.97	1.0	0.96	0.54	0.72	0.94	1.0	1.0	0.97	0.87	0.86	0.83	0.68	0.43	0.47	1.0	0.81	0.5	0.49	0.8	0.46	0.38	0.56	1.0	1.0	0.71	0.72	0.49	0.52	0.21	0.33	0.6	0.41	0.37	0.37
chr12	19675671	0.0	0.27	0.2	0.37	0.0	0.0	0.0	0.73	0.93	0.38	0.14	0.03	0.82	0.81	0.95	0.79	0.34	0.69	0.83	0.91	0.78	0.81	0.82	0.75	0.74	0.43	0.12	0.23	0.88	0.43	0.24	0.31	0.72	0.0	0.1	0.42	1.0	0.97	0.39	0.69	0.12	0.16	0.0	0.03	0.12	0.0	0.11	0.15
chr12	19805742	1.0	0.59	0.87	0.62	0.84	1.0	0.94	0.63	0.29	0.56	0.88	0.91	0.16	0.25	0.33	0.54	0.68	0.41	0.3	0.33	0.43	0.43	0.44	0.48	0.51	0.76	0.87	0.89	0.63	0.72	0.78	0.77	0.67	0.9	0.88	0.75	0.57	0.34	0.59	0.57	0.73	0.96	1.0	1.0	0.91	0.84	0.91	0.82
chr12	19991399	0.09	0.56	0.12	0.44	0.0	0.05	0.06	0.68	1.0	0.48	0.13	0.03	1.0	0.91	1.0	0.83	0.38	0.68	0.95	1.0	0.88	0.84	0.67	0.7	0.76	0.34	0.25	0.43	0.9	0.69	0.28	0.21	0.85	0.09	0.06	0.42	1.0	1.0	0.78	0.5	0.27	0.18	0.14	0.0	0.24	0.28	0.17	0.08
chr12	20029219	1.0	0.91	0.91	0.64	1.0	1.0	1.0	0.91	0.46	0.83	0.96	0.97	0.22	0.35	0.76	0.44	0.84	0.7	0.59	0.39	0.48	0.61	0.57	0.4	0.52	0.91	0.98	0.93	0.28	0.78	0.87	0.97	0.44	1.0	0.93	0.94	0.64	0.49	0.71	0.64	0.94	1.0	1.0	0.95	0.88	1.0	0.97	1.0
chr12	20297033	0.21	0.5	0.26	0.62	0.1	0.28	0.13	0.66	0.67	0.46	0.15	0.1	0.83	0.84	0.81	0.82	0.46	0.73	0.88	0.97	0.83	0.65	0.61	0.86	0.82	0.5	0.29	0.51	0.71	0.58	0.5	0.47	0.62	0.18	0.36	0.32	0.87	0.65	0.59	0.58	0.42	0.29	0.11	0.22	0.27	0.29	0.24	0.33
chr12	20358749	0.08	0.55	0.16	0.61	0.0	0.15	0.17	0.71	0.96	0.5	0.24	0.08	1.0	0.97	0.91	0.93	0.42	0.76	0.86	1.0	0.85	1.0	0.85	0.78	0.78	0.55	0.28	0.19	0.88	0.72	0.25	0.41	0.88	0.2	0.15	0.43	1.0	0.97	0.74	0.68	0.42	0.11	0.14	0.12	0.16	0.23	0.18	0.17
chr12	20438242	0.75	0.58	0.48	0.38	0.74	0.53	0.63	0.32	0.08	0.81	0.57	0.45	0.08	0.19	0.04	0.1	0.62	0.12	0.0	0.1	0.06	0.63	0.32	0.31	0.38	0.82	0.6	0.6	0.94	0.83	0.82	0.76	0.55	0.75	0.62	0.5	0.59	0.19	0.62	0.67	0.69	0.79	0.68	0.65	0.74	0.55	0.61	0.53
chr12	20732163	0.36	0.62	0.39	0.74	0.44	0.28	0.12	0.76	1.0	0.68	0.46	0.45	0.9	0.86	1.0	0.77	0.25	0.81	1.0	0.86	0.86	0.65	0.84	0.86	0.79	0.47	0.33	0.35	0.94	0.56	0.47	0.58	0.69	0.29	0.52	0.42	0.75	0.9	0.63	0.79	0.64	0.36	0.28	0.38	0.36	0.38	0.53	0.71
chr12	20764531	0.45	0.5	0.32	0.48	0.53	0.17	0.27	0.49	1.0	0.43	0.25	0.33	1.0	0.97	1.0	0.93	0.44	0.85	0.91	1.0	0.96	0.86	0.82	0.83	0.72	0.35	0.34	0.23	0.93	0.61	0.35	0.39	0.89	0.25	0.46	0.59	0.81	1.0	0.83	0.7	0.53	0.29	0.38	0.16	0.41	0.34	0.33	0.21
chr12	20775663	0.41	0.62	0.36	0.69	0.32	0.33	0.38	0.56	0.94	0.75	0.39	0.48	1.0	0.97	1.0	0.97	0.67	0.92	0.9	1.0	0.93	1.0	0.94	0.85	0.84	0.49	0.54	0.5	0.96	0.67	0.67	0.54	0.94	0.33	0.41	0.44	0.94	1.0	0.86	0.89	0.57	0.39	0.44	0.45	0.58	0.55	0.4	0.32
chr12	20883450	0.95	0.8	0.93	0.5	0.94	0.94	0.84	0.81	0.28	0.89	0.95	0.97	0.36	0.47	0.59	0.44	0.9	0.5	0.48	0.32	0.74	0.62	0.57	0.5	0.5	0.85	0.94	0.91	0.5	0.73	0.9	0.78	0.63	1.0	0.83	0.69	0.35	0.25	0.56	0.75	0.77	0.91	0.87	0.97	0.9	0.91	0.94	1.0
chr12	21022713	0.19	0.6	0.37	0.55	0.28	0.29	0.41	0.76	1.0	0.42	0.35	0.34	0.83	0.96	1.0	0.88	0.38	0.73	0.96	1.0	0.81	0.68	0.73	0.79	0.79	0.46	0.32	0.42	0.71	0.53	0.45	0.45	0.92	0.26	0.39	0.63	0.72	1.0	0.62	0.53	0.46	0.46	0.07	0.15	0.45	0.42	0.28	0.22
chr12	21093109	0.25	0.62	0.39	0.56	0.16	0.12	0.08	0.64	1.0	0.62	0.23	0.16	0.95	0.93	1.0	0.93	0.49	0.88	0.96	0.94	0.92	0.86	0.83	0.75	0.74	0.61	0.17	0.28	0.79	0.58	0.43	0.34	0.94	0.24	0.18	0.43	0.96	0.97	0.8	0.7	0.59	0.13	0.31	0.31	0.17	0.23	0.15	0.22
chr12	21266064	0.71	0.43	0.77	0.69	0.67	0.83	0.74	0.44	0.35	0.57	0.73	0.72	0.35	0.28	0.19	0.19	0.64	0.38	0.5	0.19	0.18	0.14	0.52	0.32	0.42	0.69	0.67	0.66	0.26	0.35	0.75	0.64	0.31	0.82	0.72	0.52	0.18	0.18	0.43	0.47	0.66	0.7	0.92	0.89	0.67	0.82	0.78	0.58
chr12	21351013	0.06	0.58	0.08	0.48	0.06	0.05	0.0	0.63	1.0	0.57	0.24	0.04	1.0	1.0	1.0	0.93	0.44	0.69	0.93	1.0	0.73	0.93	0.87	0.81	0.84	0.34	0.2	0.31	0.77	0.48	0.25	0.21	0.84	0.04	0.15	0.38	1.0	1.0	0.62	0.61	0.42	0.17	0.08	0.05	0.23	0.21	0.16	0.18
chr12	21373645	0.95	0.78	0.83	0.58	0.94	0.86	1.0	0.54	0.3	0.75	0.95	0.97	0.26	0.34	0.3	0.29	0.65	0.55	0.37	0.54	0.33	0.39	0.33	0.33	0.68	0.67	0.8	0.79	0.41	0.59	0.94	0.76	0.39	1.0	0.94	0.7	0.21	0.29	0.48	0.35	0.67	0.96	1.0	0.95	0.91	0.8	0.93	0.81
chr12	21573226	0.0	0.3	0.07	0.46	0.0	0.0	0.0	0.3	0.52	0.39	0.24	0.0	0.61	0.74	0.76	0.59	0.37	0.47	0.63	0.78	0.57	0.5	0.5	0.41	0.65	0.3	0.06	0.08	0.5	0.34	0.0	0.16	0.46	0.04	0.07	0.3	0.77	0.81	0.59	0.61	0.31	0.0	0.0	0.0	0.09	0.04	0.03	0.07
chr12	21656076	0.21	0.5	0.57	0.78	0.35	0.12	0.27	0.58	1.0	0.59	0.39	0.39	1.0	0.97	1.0	0.9	0.57	0.73	1.0	0.96	0.83	0.91	0.81	0.67	0.83	0.53	0.31	0.42	0.95	0.61	0.53	0.58	0.9	0.32	0.42	0.71	1.0	1.0	0.83	0.85	0.61	0.36	0.17	0.32	0.51	0.41	0.32	0.24
chr12	21696999	0.75	0.62	0.87	0.59	0.7	0.74	0.68	0.43	0.55	0.41	0.88	0.77	0.21	0.32	0.05	0.29	0.68	0.44	0.38	0.26	0.21	0.33	0.29	0.44	0.47	0.68	0.68	0.74	0.22	0.41	0.65	0.8	0.35	0.89	0.71	0.5	0.48	0.24	0.62	0.49	0.7	0.79	0.89	0.69	0.65	0.74	0.75	0.77
chr12	21811743	0.04	0.24	0.07	0.14	0.0	0.04	0.0	0.24	0.88	0.18	0.11	0.12	0.44	0.74	0.72	0.69	0.07	0.33	0.72	0.67	0.44	0.61	0.5	0.38	0.49	0.32	0.05	0.14	0.83	0.3	0.05	0.1	0.58	0.0	0.03	0.19	0.75	0.65	0.54	0.39	0.28	0.09	0.04	0.0	0.07	0.0	0.0	0.0
chr12	21844740	0.0	0.52	0.09	0.57	0.0	0.14	0.0	0.72	0.94	0.32	0.05	0.0	0.84	0.86	0.86	0.83	0.27	0.77	0.69	0.71	0.77	0.77	0.75	0.68	0.64	0.38	0.15	0.16	0.89	0.5	0.25	0.18	0.72	0.0	0.05	0.42	0.9	0.85	0.56	0.56	0.17	0.12	0.14	0.0	0.2	0.12	0.07	0.17
chr12	21958216	0.89	0.56	0.9	0.65	0.85	0.75	0.97	0.38	0.18	0.52	0.71	0.93	0.16	0.31	0.03	0.27	0.65	0.43	0.3	0.1	0.26	0.43	0.42	0.39	0.41	0.59	0.78	0.71	0.32	0.41	0.84	0.66	0.13	0.85	0.9	0.52	0.17	0.15	0.44	0.43	0.72	0.89	0.93	0.8	0.82	0.79	0.82	0.87
chr12	22045251	0.0	0.16	0.06	0.26	0.0	0.0	0.04	0.43	0.7	0.42	0.12	0.06	0.55	0.61	0.45	0.52	0.17	0.48	0.61	0.62	0.72	0.49	0.49	0.41	0.48	0.3	0.07	0.1	0.57	0.35	0.32	0.12	0.36	0.0	0.03	0.12	0.65	0.55	0.34	0.41	0.24	0.0	0.0	0.11	0.21	0.03	0.16	0.11
chr12	22113864	0.07	0.53	0.15	0.5	0.0	0.09	0.15	0.55	0.92	0.45	0.21	0.04	0.87	0.96	1.0	0.79	0.41	0.63	0.86	0.89	0.83	0.72	0.76	0.7	0.78	0.28	0.22	0.3	0.93	0.65	0.27	0.18	0.67	0.07	0.11	0.43	0.83	0.88	0.55	0.57	0.41	0.18	0.09	0.06	0.19	0.12	0.09	0.07
chr12	22307736	0.25	0.58	0.12	0.3	0.0	0.0	0.07	0.65	0.94	0.45	0.32	0.15	0.91	0.97	1.0	0.93	0.4	0.79	0.93	0.86	0.8	0.82	0.67	0.7	0.77	0.26	0.16	0.2	0.79	0.48	0.32	0.15	0.83	0.04	0.28	0.5	1.0	0.97	0.55	0.6	0.32	0.11	0.05	0.0	0.21	0.2	0.19	0.1
chr12	22474661	0.96	0.62	0.91	0.78	1.0	1.0	1.0	0.8	0.57	0.83	0.96	0.95	0.36	0.65	0.5	0.59	0.74	0.89	0.52	0.61	0.65	0.66	0.51	0.48	0.66	0.89	1.0	0.79	0.59	0.78	0.94	0.97	0.26	1.0	0.97	0.78	0.43	0.5	0.85	0.58	0.79	1.0	1.0	1.0	0.89	1.0	1.0	1.0
chr12	22645711	0.97	0.9	0.91	0.86	1.0	1.0	1.0	0.54	0.71	0.68	1.0	1.0	0.55	0.35	0.33	0.57	0.94	0.79	0.63	0.67	0.54	0.31	0.64	0.75	0.53	0.89	0.94	0.89	0.5	0.75	0.83	0.93	0.57	1.0	0.97	0.62	0.26	0.39	0.56	0.59	0.8	0.94	0.97	1.0	0.96	0.94	0.98	0.97
chr12	22723421	0.32	0.44	0.24	0.29	0.22	0.26	0.44	0.41	0.83	0.5	0.23	0.39	0.61	0.65	0.71	0.8	0.43	0.68	0.67	0.8	0.79	0.61	0.68	0.64	0.62	0.47	0.44	0.4	0.58	0.54	0.12	0.28	0.59	0.15	0.48	0.48	0.77	0.7	0.68	0.33	0.31	0.32	0.11	0.42	0.34	0.1	0.36	0.45
chr12	22801555	1.0	0.82	0.97	0.67	1.0	0.95	1.0	0.67	0.5	0.83	0.94	1.0	0.71	0.42	0.37	0.58	0.93	0.76	0.39	0.63	0.83	0.33	0.67	0.73	0.48	0.85	0.92	0.94	0.56	0.88	1.0	1.0	0.62	1.0	1.0	1.0	0.4	0.65	0.73	0.76	0.83	0.96	0.91	1.0	0.88	1.0	1.0	1.0
chr12	22816586	0.17	0.54	0.09	0.34	0.16	0.1	0.13	0.46	0.77	0.36	0.17	0.23	0.56	0.57	0.73	0.54	0.25	0.62	0.54	0.87	0.57	0.67	0.66	0.32	0.48	0.23	0.38	0.31	0.45	0.5	0.35	0.26	0.41	0.4	0.21	0.29	0.79	0.77	0.62	0.53	0.21	0.08	0.1	0.08	0.19	0.1	0.17	0.14
chr12	22838294	0.0	0.37	0.1	0.28	0.0	0.0	0.0	0.6	0.74	0.48	0.1	0.0	0.77	0.81	0.83	0.62	0.19	0.58	0.84	0.76	0.73	0.73	0.61	0.59	0.59	0.22	0.07	0.12	0.79	0.37	0.17	0.07	0.6	0.0	0.08	0.38	0.75	0.81	0.48	0.65	0.2	0.04	0.08	0.0	0.19	0.19	0.12	0.1
chr12	22867209	0.38	0.63	0.18	0.34	0.44	0.11	0.21	0.53	0.89	0.55	0.43	0.23	0.95	0.93	1.0	0.8	0.41	0.65	0.96	0.87	0.86	0.88	0.79	0.78	0.69	0.23	0.32	0.27	0.67	0.58	0.42	0.37	0.9	0.15	0.26	0.66	1.0	0.65	0.68	0.64	0.48	0.3	0.1	0.33	0.35	0.47	0.27	0.25
chr12	22881885	0.0	0.6	0.1	0.38	0.0	0.2	0.0	0.67	0.86	0.54	0.09	0.03	0.9	0.79	0.83	0.6	0.38	0.5	0.81	0.89	0.86	0.91	0.81	0.56	0.73	0.31	0.17	0.22	0.78	0.25	0.48	0.21	0.43	0.0	0.15	0.38	0.87	0.82	0.54	0.64	0.2	0.16	0.0	0.0	0.07	0.23	0.08	0.03
chr12	22893260	0.0	0.39	0.03	0.46	0.0	0.0	0.0	0.61	1.0	0.48	0.05	0.0	0.96	1.0	1.0	0.94	0.39	0.67	1.0	0.93	0.89	0.86	0.65	0.62	0.62	0.18	0.09	0.09	1.0	0.35	0.18	0.15	0.76	0.0	0.0	0.24	1.0	1.0	0.68	0.47	0.3	0.04	0.0	0.0	0.12	0.38	0.0	0.09
chr12	22964919	0.31	0.68	0.31	0.48	0.11	0.3	0.31	0.63	1.0	0.74	0.35	0.24	1.0	0.93	0.93	0.97	0.44	0.79	0.93	1.0	0.96	0.97	0.81	0.75	0.69	0.47	0.39	0.37	0.81	0.58	0.47	0.45	0.81	0.38	0.5	0.69	1.0	1.0	0.69	0.74	0.45	0.25	0.29	0.3	0.42	0.4	0.37	0.4
chr12	22990275	0.43	0.74	0.57	0.74	0.44	0.42	0.63	0.89	1.0	0.79	0.46	0.39	1.0	1.0	1.0	0.97	0.68	0.93	1.0	1.0	0.91	0.97	0.85	0.93	0.9	0.55	0.5	0.48	1.0	0.88	0.62	0.69	0.94	0.46	0.59	0.79	1.0	1.0	0.8	0.87	0.79	0.53	0.47	0.55	0.46	0.46	0.39	0.51
chr12	23024207	0.23	0.56	0.49	0.66	0.25	0.54	0.34	0.62	1.0	0.63	0.36	0.35	1.0	0.97	1.0	0.97	0.47	0.88	1.0	1.0	0.86	0.91	0.79	0.67	0.83	0.36	0.31	0.33	0.83	0.81	0.5	0.32	0.85	0.48	0.33	0.5	1.0	1.0	0.73	0.79	0.42	0.41	0.35	0.13	0.45	0.2	0.27	0.39
chr12	23090719	0.9	0.75	0.9	0.69	1.0	0.95	1.0	0.62	0.59	0.68	1.0	1.0	0.3	0.61	0.48	0.39	0.8	0.38	0.44	0.27	0.61	0.46	0.55	0.61	0.53	0.88	0.86	0.88	0.89	0.73	0.91	0.91	0.34	1.0	0.91	0.69	0.74	0.42	0.66	0.59	0.81	0.87	1.0	1.0	0.94	1.0	0.89	0.89
chr12	23118242	0.0	0.19	0.07	0.19	0.0	0.0	0.0	0.32	0.42	0.23	0.04	0.0	0.62	0.63	0.44	0.41	0.03	0.48	0.56	0.43	0.33	0.58	0.29	0.39	0.39	0.17	0.05	0.1	0.25	0.19	0.08	0.06	0.56	0.0	0.03	0.12	0.62	0.56	0.3	0.37	0.12	0.0	0.03	0.0	0.12	0.0	0.0	0.14
chr12	23465916	0.1	0.38	0.13	0.38	0.0	0.0	0.04	0.39	0.7	0.3	0.21	0.0	0.68	0.53	0.65	0.7	0.2	0.52	0.52	0.63	0.44	0.55	0.52	0.67	0.62	0.28	0.11	0.11	0.74	0.24	0.05	0.15	0.6	0.0	0.27	0.39	0.76	0.61	0.43	0.47	0.27	0.09	0.03	0.08	0.18	0.15	0.08	0.24
chr12	23483190	0.38	0.71	0.39	0.62	0.35	0.4	0.46	0.63	1.0	0.6	0.38	0.28	0.89	0.97	1.0	0.81	0.41	0.69	1.0	1.0	0.92	0.89	0.81	0.83	0.81	0.54	0.3	0.39	1.0	0.65	0.58	0.27	0.88	0.14	0.45	0.6	1.0	1.0	0.83	0.81	0.69	0.28	0.05	0.14	0.27	0.36	0.4	0.56
chr12	24050904	0.1	0.34	0.13	0.4	0.0	0.0	0.0	0.56	1.0	0.37	0.17	0.03	1.0	1.0	1.0	0.85	0.38	0.63	0.93	0.92	0.81	0.84	0.85	0.7	0.73	0.36	0.22	0.35	1.0	0.38	0.18	0.19	0.93	0.0	0.2	0.33	0.96	0.94	0.66	0.62	0.26	0.1	0.22	0.03	0.17	0.04	0.22	0.38
chr12	24119713	0.0	0.37	0.06	0.16	0.0	0.0	0.0	0.59	0.71	0.38	0.21	0.03	0.71	0.84	0.68	0.76	0.3	0.5	0.78	0.68	0.6	0.64	0.7	0.54	0.53	0.28	0.19	0.33	0.67	0.41	0.35	0.21	0.5	0.0	0.11	0.24	0.91	0.79	0.5	0.36	0.27	0.18	0.18	0.0	0.13	0.18	0.08	0.19
chr12	24305783	0.15	0.44	0.55	0.45	0.34	0.43	0.11	0.58	0.93	0.68	0.39	0.38	0.92	1.0	0.86	1.0	0.42	0.79	0.94	0.93	0.79	0.83	0.86	0.85	0.93	0.42	0.34	0.5	0.9	0.73	0.53	0.31	0.92	0.27	0.35	0.5	0.96	0.96	0.76	0.82	0.57	0.4	0.38	0.31	0.31	0.24	0.35	0.39
chr12	24348877	0.58	0.75	0.48	0.55	0.3	0.44	0.53	0.97	1.0	0.58	0.29	0.62	0.92	1.0	1.0	1.0	0.5	0.71	1.0	1.0	0.91	0.86	0.86	0.83	0.81	0.58	0.48	0.52	1.0	0.79	0.48	0.5	0.82	0.68	0.53	0.54	0.9	1.0	0.79	0.78	0.74	0.42	0.32	0.29	0.48	0.39	0.45	0.52
chr12	24487696	0.97	0.85	0.94	0.85	1.0	0.96	1.0	0.74	0.28	0.55	0.85	0.96	0.48	0.34	0.55	0.29	0.73	0.33	0.36	0.32	0.65	0.42	0.48	0.55	0.64	0.71	0.92	0.74	0.16	0.68	0.94	0.91	0.37	1.0	0.89	0.81	0.52	0.16	0.52	0.54	0.85	0.82	0.94	1.0	0.85	0.97	0.92	0.85
chr12	24511969	0.04	0.44	0.0	0.21	0.0	0.0	0.0	0.35	0.5	0.42	0.0	0.08	0.36	0.55	0.39	0.38	0.2	0.39	0.38	0.8	0.16	0.53	0.5	0.3	0.32	0.22	0.05	0.2	0.18	0.22	0.05	0.06	0.38	0.0	0.0	0.25	0.48	0.67	0.48	0.28	0.24	0.26	0.0	0.0	0.15	0.0	0.04	0.0
chr12	24546056	0.03	0.33	0.07	0.29	0.0	0.0	0.0	0.56	0.45	0.21	0.21	0.0	0.4	0.36	0.36	0.46	0.15	0.43	0.53	0.61	0.5	0.35	0.57	0.44	0.45	0.12	0.16	0.18	0.42	0.33	0.18	0.11	0.4	0.0	0.2	0.19	0.67	0.51	0.37	0.6	0.24	0.0	0.0	0.0	0.2	0.0	0.04	0.27
chr12	24571048	0.08	0.5	0.07	0.65	0.06	0.09	0.12	0.5	1.0	0.57	0.14	0.07	1.0	0.86	0.88	0.95	0.38	0.67	1.0	1.0	0.86	1.0	0.87	0.65	0.89	0.29	0.2	0.33	0.88	0.38	0.28	0.35	0.64	0.06	0.14	0.65	0.9	1.0	0.55	0.72	0.23	0.04	0.1	0.09	0.21	0.25	0.09	0.38
chr12	24584274	0.03	0.07	0.03	0.12	0.0	0.0	0.0	0.16	0.56	0.14	0.1	0.04	0.56	0.44	0.56	0.35	0.05	0.33	0.4	0.5	0.59	0.32	0.32	0.38	0.24	0.19	0.07	0.07	0.3	0.35	0.0	0.12	0.09	0.0	0.07	0.12	0.65	0.74	0.44	0.27	0.09	0.1	0.0	0.0	0.03	0.0	0.0	0.08
chr12	24594493	0.06	0.35	0.08	0.38	0.0	0.0	0.0	0.62	1.0	0.48	0.13	0.07	1.0	0.91	1.0	0.97	0.42	0.64	0.97	1.0	0.7	0.88	0.76	0.81	0.68	0.44	0.05	0.3	0.81	0.52	0.21	0.24	0.66	0.04	0.14	0.35	0.96	1.0	0.62	0.4	0.31	0.1	0.04	0.07	0.33	0.12	0.22	0.2
chr12	24617710	0.0	0.38	0.0	0.16	0.0	0.0	0.0	0.27	0.58	0.09	0.11	0.03	0.52	0.61	0.61	0.52	0.14	0.2	0.5	0.62	0.54	0.44	0.54	0.19	0.5	0.22	0.17	0.25	0.59	0.24	0.25	0.04	0.31	0.0	0.03	0.21	0.43	0.43	0.29	0.37	0.25	0.0	0.05	0.0	0.08	0.0	0.17	0.0
chr12	24666286	0.97	0.75	0.94	0.79	1.0	0.96	1.0	0.53	0.26	0.43	0.92	1.0	0.29	0.37	0.5	0.38	0.75	0.39	0.36	0.31	0.47	0.49	0.5	0.68	0.5	0.76	0.85	0.88	0.39	0.7	0.75	1.0	0.38	1.0	0.93	0.68	0.38	0.32	0.65	0.7	0.88	1.0	1.0	0.97	0.91	0.81	0.89	0.76
chr12	25288343	0.93	0.43	0.89	0.61	1.0	1.0	1.0	0.32	0.0	0.46	0.77	0.97	0.0	0.0	0.0	0.0	0.6	0.45	0.09	0.0	0.29	0.08	0.24	0.27	0.25	0.64	0.74	0.64	0.0	0.44	0.65	0.88	0.34	1.0	0.85	0.65	0.04	0.0	0.21	0.28	0.57	0.87	0.86	1.0	0.74	0.85	0.93	0.83
chr12	25359696	0.0	0.27	0.09	0.18	0.0	0.0	0.0	0.35	0.56	0.24	0.12	0.0	0.53	0.43	0.56	0.54	0.26	0.5	0.5	0.76	0.54	0.72	0.55	0.42	0.32	0.23	0.15	0.07	0.53	0.27	0.35	0.1	0.57	0.0	0.03	0.33	0.56	0.67	0.53	0.49	0.33	0.04	0.0	0.0	0.18	0.09	0.08	0.11
chr12	25379503	1.0	0.74	0.96	0.79	1.0	1.0	1.0	0.67	0.25	0.57	0.92	1.0	0.2	0.5	0.35	0.39	0.7	0.53	0.33	0.33	0.5	0.33	0.48	0.57	0.32	0.82	0.94	0.79	0.26	0.58	0.82	0.9	0.3	1.0	1.0	0.96	0.5	0.48	0.79	0.7	0.89	0.97	1.0	1.0	0.91	0.89	1.0	0.84
chr12	25415059	0.97	0.56	0.94	0.46	1.0	1.0	1.0	0.44	0.0	0.61	0.76	0.96	0.05	0.0	0.0	0.15	0.53	0.4	0.1	0.0	0.23	0.27	0.12	0.52	0.48	0.71	0.8	0.8	0.39	0.42	1.0	0.87	0.52	1.0	0.94	0.71	0.06	0.14	0.42	0.41	0.82	0.8	1.0	0.89	0.9	0.96	0.89	0.78
chr12	25537903	0.0	0.42	0.06	0.08	0.0	0.0	0.0	0.53	0.68	0.38	0.05	0.0	0.75	0.92	0.67	0.71	0.32	0.48	0.85	0.85	0.6	0.61	0.63	0.68	0.68	0.29	0.16	0.23	0.75	0.39	0.16	0.13	0.78	0.0	0.14	0.33	0.96	0.69	0.52	0.63	0.23	0.07	0.0	0.0	0.03	0.09	0.11	0.09
chr12	25558002	0.0	0.54	0.06	0.46	0.0	0.0	0.0	0.62	0.95	0.47	0.05	0.03	0.95	0.95	0.89	0.93	0.51	0.69	0.96	1.0	0.84	1.0	0.86	0.72	0.57	0.33	0.12	0.27	0.89	0.58	0.19	0.15	0.81	0.0	0.15	0.27	0.95	0.9	0.59	0.73	0.26	0.16	0.0	0.0	0.12	0.11	0.0	0.13
chr13	5674463	0.62	0.48	1.0	1.0	1.0	1.0	1.0	0.49	1.0	0.89	0.88	0.96	1.0	1.0	1.0	1.0	0.47	1.0	1.0	1.0	1.0	1.0	0.93	1.0	1.0	0.63	0.81	0.79	1.0	0.97	0.74	0.74	1.0	1.0	1.0	1.0	0.97	0.97	1.0	1.0	0.69	0.43	0.44	1.0	0.46	0.45	0.49	0.83
chr13	5691353	0.42	0.5	0.97	1.0	0.94	1.0	0.92	0.53	0.88	1.0	0.83	0.97	1.0	1.0	0.96	0.97	0.46	0.97	1.0	1.0	0.93	0.91	0.93	1.0	0.97	0.6	0.71	0.79	0.96	0.93	0.69	0.88	0.97	1.0	0.86	0.93	0.96	1.0	0.97	0.92	0.33	0.5	0.48	0.88	0.58	0.32	0.46	0.68
chr13	5749894	0.35	0.42	1.0	1.0	1.0	1.0	1.0	0.44	0.93	1.0	0.86	1.0	1.0	1.0	1.0	1.0	0.35	1.0	1.0	1.0	1.0	0.84	0.91	1.0	1.0	0.45	0.58	0.62	0.94	0.87	0.82	0.8	0.91	1.0	0.69	0.93	0.79	1.0	0.91	0.92	0.38	0.41	0.43	1.0	0.47	0.4	0.26	0.64
chr13	5898153	0.55	0.5	0.83	0.9	1.0	0.82	0.97	0.36	0.93	1.0	0.71	0.97	1.0	0.97	0.91	1.0	0.51	0.97	0.96	0.91	0.97	1.0	1.0	1.0	1.0	0.44	0.62	0.56	1.0	0.94	0.67	0.85	0.96	1.0	0.83	0.96	0.92	0.84	0.91	0.98	0.5	0.29	0.41	0.95	0.49	0.68	0.68	0.74
chr13	19497682	0.38	0.5	0.9	0.84	0.94	0.86	0.97	0.58	0.93	1.0	0.54	0.97	0.93	0.95	1.0	1.0	0.47	1.0	0.94	0.94	1.0	1.0	0.97	1.0	1.0	0.55	0.49	0.59	1.0	1.0	0.62	0.93	0.97	1.0	0.56	1.0	0.89	0.9	1.0	1.0	0.51	0.6	0.57	0.97	0.5	0.57	0.37	0.5
chr13	19664014	0.33	0.45	1.0	0.97	1.0	1.0	1.0	0.49	0.93	0.95	0.56	1.0	1.0	1.0	1.0	0.97	0.43	1.0	1.0	1.0	1.0	0.88	0.94	0.94	0.95	0.5	0.45	0.59	0.87	0.91	0.64	0.75	0.93	1.0	0.6	0.56	0.88	0.96	0.92	0.95	0.46	0.39	0.38	1.0	0.4	0.47	0.27	0.29
chr13	23844312	0.81	0.59	0.47	0.5	0.47	0.63	0.38	0.78	0.33	0.75	0.48	0.42	0.36	0.5	0.38	0.39	0.38	0.58	0.38	0.52	0.28	0.37	0.56	0.57	0.44	0.5	0.44	0.45	0.54	0.47	0.27	0.38	0.11	0.28	0.81	0.94	0.45	0.83	0.93	0.89	0.85	0.73	0.85	0.9	0.96	0.95	0.81	0.85
chr13	26492528	0.67	0.75	0.29	0.33	0.24	0.28	0.21	0.68	0.19	0.26	0.43	0.35	0.22	0.23	0.21	0.26	0.22	0.31	0.26	0.3	0.36	0.1	0.44	0.17	0.27	0.4	0.33	0.22	0.31	0.25	0.13	0.33	0.37	0.36	0.79	0.52	0.29	0.89	0.81	0.48	0.52	0.41	0.48	0.33	0.59	0.78	0.73	0.44
chr13	27965486	0.39	0.42	0.0	0.0	0.0	0.0	0.0	0.22	0.0	0.73	0.14	0.0	0.0	0.0	0.0	0.0	0.31	0.0	0.0	0.0	0.04	0.45	0.09	0.0	0.0	0.35	0.09	0.23	0.83	0.71	0.75	0.74	0.18	0.0	0.02	0.77	0.57	0.0	0.19	0.09	0.4	0.38	0.3	0.0	0.38	0.33	0.27	0.05
chr14	254110	0.96	0.86	0.69	0.46	0.47	0.61	0.57	0.93	0.58	0.27	0.35	0.41	0.5	0.5	0.5	0.37	0.46	0.68	0.52	0.54	0.48	0.38	0.43	0.5	0.62	0.39	0.55	0.37	0.4	0.5	0.2	0.54	0.39	0.25	0.93	0.92	0.5	0.89	0.91	0.81	0.75	0.95	0.95	0.7	0.6	0.7	0.63	0.76
chr14	2259813	0.3	0.57	0.36	0.28	0.33	0.29	0.2	0.44	0.25	0.36	0.32	0.26	0.33	0.21	0.31	0.22	0.28	0.26	0.25	0.46	0.16	0.14	0.08	0.56	0.24	0.25	0.21	0.29	0.37	0.23	0.25	0.26	0.25	0.28	0.45	0.7	0.38	0.5	0.52	0.79	0.76	0.59	0.54	0.79	0.9	0.76	0.77	0.71
chr15	3843555	0.93	0.8	0.68	0.65	0.73	0.79	0.69	0.97	0.48	0.55	0.53	0.6	0.47	0.66	0.54	0.43	0.57	0.4	0.67	0.63	0.64	0.48	0.5	0.42	0.55	0.53	0.51	0.42	0.43	0.59	0.24	0.39	0.52	0.58	0.93	1.0	0.58	0.89	0.9	0.97	0.88	0.96	0.94	0.96	1.0	0.97	0.91	0.84
chr15	4374703	0.62	0.76	0.11	0.14	0.0	0.22	0.0	0.62	0.03	0.13	0.08	0.14	0.17	0.09	0.07	0.09	0.02	0.06	0.09	0.06	0.09	0.03	0.0	0.17	0.03	0.06	0.06	0.05	0.11	0.03	0.0	0.03	0.03	0.04	0.72	0.61	0.08	0.62	0.67	0.55	0.64	0.71	0.41	0.52	0.54	0.46	0.51	0.35
chr15	5398658	0.26	0.38	0.2	0.17	0.06	0.17	0.19	0.18	0.18	0.64	0.31	0.17	0.2	0.07	0.12	0.11	0.31	0.13	0.18	0.16	0.16	0.45	0.39	0.15	0.21	0.31	0.25	0.31	0.72	0.66	0.79	0.64	0.56	0.0	0.24	0.56	0.64	0.06	0.26	0.21	0.27	0.29	0.14	0.07	0.28	0.33	0.17	0.12
chr15	5639450	0.77	0.72	0.34	0.27	0.32	0.21	0.44	0.87	0.43	0.64	0.77	0.31	0.44	0.07	0.26	0.59	0.83	0.24	0.38	0.17	0.26	0.59	0.62	0.58	0.66	0.93	0.67	0.61	0.71	0.62	0.73	0.53	0.51	0.52	0.68	0.37	0.57	0.31	0.52	0.47	0.69	0.9	0.83	0.52	0.83	0.75	0.74	0.47
chr15	5659279	0.21	0.19	0.75	0.82	0.83	0.73	0.52	0.26	0.74	0.67	0.77	0.75	0.88	0.65	0.75	0.82	0.26	0.85	0.8	0.76	0.71	0.57	0.63	0.57	0.67	0.28	0.45	0.55	0.5	0.54	0.4	0.58	0.64	0.86	0.71	0.71	0.57	0.78	0.56	0.74	0.23	0.16	0.24	0.68	0.2	0.25	0.24	0.67
chr15	5789596	0.81	0.62	0.39	0.13	0.33	0.19	0.51	0.63	0.26	0.19	0.23	0.31	0.19	0.32	0.14	0.2	0.64	0.15	0.32	0.34	0.23	0.25	0.15	0.16	0.14	0.64	0.33	0.36	0.3	0.27	0.41	0.44	0.34	0.33	0.18	0.19	0.39	0.43	0.27	0.22	0.62	0.74	0.75	0.17	0.61	0.69	0.9	0.21
chr15	6907571	0.72	0.5	0.87	0.59	0.18	0.81	0.12	0.79	0.85	0.38	0.79	0.61	0.73	0.84	0.9	0.82	0.64	0.62	0.85	0.85	0.42	0.56	0.5	0.62	0.64	0.7	0.81	0.9	0.37	0.38	0.62	0.57	0.47	0.96	0.92	0.74	0.22	0.86	0.33	0.51	0.71	0.59	0.62	0.7	0.68	0.81	0.79	0.87
chr15	7650338	1.0	1.0	0.21	0.16	0.42	0.35	0.42	1.0	0.36	0.59	0.25	0.59	0.26	0.45	0.36	0.33	0.54	0.5	0.33	0.36	0.54	0.66	0.59	0.52	0.59	0.43	0.4	0.32	0.49	0.41	0.32	0.52	0.37	0.4	1.0	1.0	0.74	1.0	1.0	0.97	1.0	1.0	1.0	1.0	1.0	0.89	1.0	1.0
chr15	7749094	0.94	0.79	0.44	0.39	0.88	0.25	0.82	0.86	0.2	0.78	0.25	0.92	0.26	0.07	0.12	0.32	1.0	0.67	0.26	0.35	0.78	0.87	0.87	0.88	0.88	0.97	0.33	0.3	0.94	0.71	0.8	0.9	1.0	0.41	0.22	0.96	0.82	0.33	0.91	0.91	1.0	0.83	0.95	0.97	0.92	0.96	0.9	0.08
chr15	7763122	0.07	0.0	0.97	1.0	0.2	1.0	0.16	0.03	0.92	0.0	0.95	0.1	0.95	0.96	1.0	0.74	0.0	0.21	0.95	1.0	0.17	0.14	0.1	0.0	0.0	0.0	0.89	0.89	0.0	0.04	0.33	0.16	0.0	1.0	0.93	0.25	0.09	0.91	0.0	0.16	0.04	0.08	0.03	0.0	0.0	0.0	0.22	0.97
chr15	7824145	0.69	0.88	0.17	0.32	0.3	0.41	0.4	0.62	0.28	0.57	0.23	0.39	0.31	0.33	0.33	0.38	0.68	0.47	0.33	0.29	0.31	0.76	0.27	0.37	0.2	0.72	0.3	0.3	0.81	0.69	0.68	0.53	0.32	0.29	0.26	0.77	0.67	0.41	0.72	0.7	0.69	0.82	0.8	0.47	0.78	0.8	0.68	0.31
chr15	7846946	0.93	0.97	0.41	0.41	0.38	0.5	0.36	0.78	0.28	0.6	0.37	0.59	0.3	0.43	0.32	0.46	0.83	0.5	0.52	0.42	0.46	0.63	0.25	0.48	0.53	0.9	0.3	0.46	0.55	0.63	0.55	0.62	0.43	0.35	0.3	0.67	0.8	0.49	0.52	0.58	0.88	0.91	0.79	0.42	0.74	0.83	0.69	0.45
chr15	7885468	0.62	0.8	0.11	0.08	0.25	0.0	0.44	0.54	0.0	0.52	0.0	0.43	0.0	0.09	0.04	0.1	0.64	0.33	0.0	0.0	0.4	0.78	0.11	0.13	0.13	0.59	0.1	0.13	0.57	0.56	0.5	0.62	0.49	0.0	0.0	0.43	0.84	0.11	0.43	0.55	0.74	0.68	0.63	0.41	0.75	0.68	0.51	0.0
chr15	7906279	0.58	0.5	0.97	1.0	1.0	1.0	0.75	0.45	1.0	0.4	1.0	0.71	1.0	0.91	1.0	0.79	0.61	0.67	0.92	1.0	0.7	0.72	0.7	0.43	0.52	0.38	0.86	0.84	0.48	0.54	0.43	0.55	0.75	1.0	0.96	0.5	0.87	0.92	0.73	0.71	0.59	0.57	0.38	0.82	0.52	0.6	0.55	0.92
chr15	7933575	0.24	0.37	0.0	0.0	0.0	0.0	0.08	0.45	0.0	0.5	0.11	0.16	0.0	0.09	0.06	0.03	0.39	0.14	0.19	0.0	0.1	0.44	0.14	0.14	0.13	0.46	0.17	0.12	0.41	0.48	0.44	0.48	0.18	0.0	0.08	0.41	0.64	0.0	0.37	0.21	0.44	0.49	0.58	0.16	0.64	0.56	0.49	0.13
chr15	7971463	0.35	0.68	0.0	0.0	0.12	0.0	0.24	0.44	0.0	0.52	0.11	0.34	0.0	0.09	0.08	0.14	0.49	0.14	0.1	0.0	0.41	0.47	0.23	0.15	0.15	0.51	0.14	0.1	0.62	0.42	0.57	0.59	0.2	0.16	0.18	0.49	0.74	0.0	0.57	0.29	0.55	0.5	0.58	0.39	0.76	0.68	0.42	0.24
chr15	8032693	0.69	0.5	0.92	1.0	0.89	1.0	0.69	0.62	1.0	0.58	1.0	0.5	1.0	0.93	1.0	0.8	0.61	0.59	0.86	0.96	0.65	0.45	0.33	0.32	0.3	0.52	0.89	0.85	0.17	0.48	0.62	0.37	0.78	0.86	0.97	0.46	0.14	0.94	0.54	0.57	0.63	0.5	0.58	0.83	0.39	0.61	0.48	0.9
chr15	8072610	0.71	0.54	1.0	1.0	1.0	1.0	0.89	0.66	1.0	0.35	0.86	0.68	1.0	1.0	1.0	0.92	0.58	0.73	0.96	0.93	0.78	0.51	0.69	0.88	0.94	0.42	0.9	1.0	0.33	0.43	0.24	0.35	0.78	1.0	0.87	0.56	0.31	1.0	0.58	0.76	0.64	0.47	0.38	0.74	0.47	0.5	0.53	0.92
chr15	8164234	0.48	0.42	0.79	0.79	0.5	0.96	0.68	0.26	0.92	0.37	0.65	0.74	0.89	0.96	0.86	0.93	0.4	0.86	0.96	0.83	0.89	0.43	0.85	0.65	0.71	0.34	0.78	0.62	0.17	0.32	0.36	0.44	0.69	0.95	0.74	0.32	0.17	0.79	0.62	0.55	0.33	0.38	0.38	0.8	0.38	0.52	0.27	0.68
chr15	8190209	0.09	0.11	0.66	0.56	0.5	0.83	0.47	0.13	0.75	0.36	0.57	0.62	0.63	0.77	0.82	0.52	0.14	0.76	0.72	0.76	0.82	0.3	0.68	0.63	0.64	0.1	0.53	0.43	0.04	0.21	0.3	0.28	0.47	0.68	0.65	0.24	0.12	0.66	0.44	0.56	0.18	0.07	0.25	0.54	0.11	0.08	0.21	0.41
chr15	8214326	0.91	0.92	0.59	0.72	0.84	0.5	0.72	0.94	0.58	1.0	0.71	0.68	0.4	0.38	0.59	0.52	0.98	0.44	0.55	0.5	0.31	0.74	0.6	0.69	0.67	0.96	0.69	0.69	0.94	0.91	0.8	0.95	0.83	0.28	0.5	0.94	0.96	0.66	0.61	0.52	0.97	0.84	0.94	0.6	0.94	0.95	0.79	0.64
chr15	8273819	0.53	0.67	0.09	0.25	0.45	0.15	0.36	0.57	0.15	0.6	0.17	0.32	0.13	0.03	0.04	0.2	0.76	0.07	0.08	0.03	0.14	0.71	0.25	0.32	0.26	0.84	0.3	0.34	0.88	0.75	0.73	0.63	0.31	0.17	0.1	0.67	0.8	0.17	0.41	0.43	0.74	0.75	0.62	0.11	0.82	0.6	0.76	0.3
chr15	8328829	0.64	0.69	0.56	0.27	0.5	0.42	0.5	0.71	0.19	0.69	0.5	0.3	0.36	0.11	0.14	0.15	0.73	0.2	0.42	0.15	0.36	0.75	0.33	0.42	0.19	0.79	0.45	0.45	0.77	0.76	0.72	0.59	0.62	0.52	0.3	0.92	0.92	0.26	0.56	0.53	0.77	0.72	0.64	0.24	0.64	0.77	0.75	0.45
chr15	8341993	0.5	0.81	0.18	0.17	0.67	0.12	0.38	0.59	0.3	0.61	0.29	0.26	0.25	0.11	0.24	0.2	0.86	0.07	0.14	0.15	0.21	0.75	0.36	0.37	0.28	0.84	0.34	0.39	0.89	0.75	0.53	0.62	0.27	0.05	0.11	0.71	0.83	0.19	0.44	0.44	0.77	0.59	0.72	0.29	0.74	0.63	0.73	0.29
chr15	8410476	0.54	0.5	0.76	0.79	0.47	0.95	0.57	0.42	0.88	0.45	0.77	0.75	0.93	1.0	0.92	0.93	0.29	0.84	0.94	0.97	0.81	0.41	0.7	0.73	0.67	0.29	0.83	0.57	0.33	0.22	0.27	0.39	0.69	1.0	0.9	0.32	0.19	0.91	0.61	0.71	0.34	0.41	0.48	0.77	0.37	0.51	0.4	0.79
chr15	8425318	0.62	0.83	0.03	0.12	0.59	0.18	0.5	0.53	0.08	0.6	0.05	0.3	0.19	0.0	0.0	0.15	0.61	0.21	0.2	0.11	0.18	0.6	0.44	0.21	0.39	0.78	0.22	0.25	0.8	0.56	0.55	0.46	0.49	0.06	0.0	0.68	0.72	0.09	0.41	0.45	0.43	0.59	0.48	0.5	0.7	0.59	0.61	0.11
chr15	8450627	0.58	0.62	0.38	0.25	0.65	0.29	0.73	0.56	0.36	0.62	0.25	0.36	0.22	0.22	0.37	0.2	0.79	0.46	0.15	0.08	0.67	0.69	0.42	0.61	0.55	0.81	0.49	0.44	0.86	0.93	0.88	0.76	0.67	0.17	0.33	0.84	0.83	0.27	0.5	0.63	0.71	0.77	0.74	0.47	0.81	0.79	0.67	0.39
chr15	8477181	0.48	0.53	0.24	0.06	0.67	0.15	0.49	0.58	0.06	0.67	0.09	0.38	0.23	0.0	0.25	0.15	0.63	0.17	0.1	0.05	0.58	0.52	0.31	0.24	0.42	0.7	0.23	0.19	0.68	0.66	0.65	0.7	0.5	0.25	0.19	0.93	0.81	0.05	0.41	0.29	0.73	0.62	0.73	0.39	0.89	0.58	0.57	0.04
chr15	8506502	0.37	0.41	0.75	0.82	0.37	0.76	0.44	0.46	0.75	0.43	0.71	0.56	0.69	0.82	0.74	0.61	0.22	0.59	0.74	0.68	0.54	0.34	0.52	0.67	0.5	0.18	0.74	0.56	0.13	0.26	0.48	0.26	0.58	0.43	0.69	0.27	0.15	0.55	0.52	0.62	0.19	0.41	0.21	0.44	0.22	0.63	0.39	0.92
chr15	8572736	0.66	0.75	0.1	0.07	0.14	0.0	0.37	0.53	0.12	0.43	0.29	0.39	0.06	0.13	0.08	0.25	0.7	0.35	0.08	0.08	0.31	0.57	0.14	0.3	0.25	0.55	0.36	0.23	0.48	0.56	0.12	0.52	0.27	0.33	0.31	0.68	0.41	0.27	0.21	0.4	0.62	0.72	0.75	0.2	0.72	0.48	0.58	0.1
chr15	8707860	0.18	0.13	0.53	0.34	0.81	0.59	0.79	0.17	0.67	0.32	0.08	0.53	0.39	0.51	0.5	0.65	0.17	0.4	0.5	0.75	0.67	0.3	0.48	0.6	0.64	0.15	0.3	0.22	0.07	0.29	0.1	0.18	0.61	0.43	0.21	0.27	0.13	0.45	0.31	0.37	0.12	0.29	0.12	0.74	0.21	0.16	0.27	0.28
chr15	8722522	0.71	0.5	1.0	0.93	0.76	0.89	0.63	0.57	0.92	0.55	0.93	0.45	1.0	0.96	1.0	0.92	0.4	0.56	0.93	0.97	0.48	0.68	0.59	0.67	0.68	0.39	0.74	0.84	0.53	0.66	0.46	0.38	0.41	0.91	0.86	0.64	0.65	0.97	0.47	0.54	0.54	0.44	0.42	0.56	0.5	0.39	0.44	0.8
chr15	8796158	0.56	0.24	0.74	0.81	0.4	0.79	0.51	0.21	0.93	0.38	0.77	0.4	0.64	0.79	0.93	0.74	0.31	0.42	0.62	0.84	0.5	0.39	0.61	0.63	0.58	0.29	0.86	0.82	0.48	0.45	0.71	0.58	0.49	0.8	0.84	0.62	0.8	0.69	0.5	0.5	0.21	0.22	0.5	0.33	0.31	0.25	0.36	0.69
chr15	8854606	0.93	0.9	0.05	0.0	0.88	0.0	0.91	0.88	0.0	0.25	0.0	0.75	0.0	0.0	0.0	0.21	0.92	0.57	0.13	0.03	0.81	0.61	0.82	0.97	0.96	0.98	0.18	0.16	0.41	0.44	0.13	0.28	0.67	0.17	0.0	0.41	0.44	0.0	0.52	0.81	0.96	0.91	0.91	0.77	1.0	1.0	0.74	0.0
chr15	8896574	0.39	0.14	0.98	1.0	0.33	1.0	0.27	0.18	1.0	0.24	1.0	0.24	1.0	0.95	1.0	0.84	0.21	0.53	0.84	0.97	0.45	0.56	0.44	0.21	0.27	0.11	0.89	0.79	0.23	0.31	0.7	0.4	0.14	1.0	1.0	0.21	0.53	0.95	0.14	0.29	0.22	0.14	0.32	0.35	0.31	0.26	0.32	0.96
chr15	8941407	0.36	0.41	0.94	0.97	0.0	0.91	0.1	0.21	0.96	0.38	0.96	0.0	0.93	0.92	0.88	0.68	0.12	0.3	0.85	0.88	0.16	0.46	0.18	0.0	0.03	0.07	0.68	0.59	0.33	0.64	0.76	0.5	0.17	0.89	0.94	0.46	0.57	0.82	0.11	0.18	0.24	0.25	0.19	0.06	0.11	0.17	0.32	0.84
chr15	8960751	0.32	0.38	0.73	0.72	0.08	0.74	0.31	0.32	0.54	0.8	0.21	0.24	0.39	0.48	0.22	0.2	0.29	0.33	0.33	0.44	0.37	0.63	0.38	0.21	0.18	0.54	0.45	0.36	0.86	0.66	0.85	0.86	0.56	0.64	0.5	0.77	0.82	0.33	0.44	0.65	0.21	0.52	0.27	0.25	0.24	0.52	0.5	0.33
chr15	8984770	0.52	0.3	0.9	0.93	0.47	0.88	0.42	0.46	0.92	0.37	1.0	0.19	0.85	1.0	0.62	0.67	0.34	0.21	0.79	0.92	0.3	0.5	0.63	0.94	0.86	0.51	0.78	0.9	0.25	0.5	0.62	0.39	0.38	0.86	0.97	0.38	0.57	0.88	0.31	0.41	0.5	0.48	0.39	0.32	0.31	0.45	0.54	0.92
chr15	9071016	0.59	0.55	0.75	0.86	0.53	0.85	0.38	0.4	0.92	0.64	0.8	0.34	0.73	0.88	0.84	0.63	0.41	0.57	0.7	0.96	0.42	0.39	0.25	0.16	0.22	0.25	0.67	0.79	0.59	0.62	0.48	0.37	0.29	0.9	0.71	0.53	0.5	0.85	0.24	0.49	0.32	0.45	0.26	0.49	0.3	0.31	0.47	0.76
chr15	9121448	0.76	0.59	0.88	0.89	0.24	0.75	0.14	0.66	0.86	0.62	0.73	0.32	1.0	0.68	0.93	0.77	0.57	0.48	0.73	0.93	0.58	0.5	0.27	0.17	0.2	0.7	0.79	0.81	0.5	0.79	0.79	0.68	0.45	0.81	0.86	0.57	0.71	0.8	0.61	0.57	0.56	0.68	0.56	0.17	0.41	0.76	0.76	0.89
chr15	9302530	0.52	0.48	0.93	0.86	0.05	0.88	0.19	0.5	0.94	0.87	0.79	0.65	0.92	1.0	0.87	0.86	0.56	0.64	0.8	0.9	0.39	0.42	0.58	0.68	0.84	0.58	0.85	0.85	0.77	0.76	0.62	0.78	0.54	1.0	0.84	0.72	0.62	0.81	0.63	0.59	0.48	0.47	0.41	0.69	0.44	0.31	0.58	0.79
chr15	9493844	0.8	0.65	0.8	0.68	0.35	0.67	0.32	0.74	0.74	0.74	0.8	0.26	0.69	0.51	0.67	0.67	0.82	0.27	0.65	0.63	0.29	0.39	0.19	0.26	0.32	0.79	0.68	0.78	0.68	0.53	0.53	0.68	0.54	0.73	0.87	0.38	0.29	0.68	0.26	0.5	0.74	0.83	0.86	0.43	0.77	0.89	0.88	0.67
chr15	9537538	0.59	0.74	0.55	0.56	0.62	0.38	0.56	0.71	0.29	0.73	0.5	0.37	0.21	0.37	0.45	0.21	0.78	0.16	0.41	0.2	0.1	0.56	0.25	0.21	0.42	0.71	0.43	0.54	0.55	0.5	0.82	0.64	0.22	0.58	0.29	0.61	0.38	0.33	0.19	0.32	0.71	0.82	0.81	0.27	0.68	0.65	0.76	0.27
chr15	9583871	0.48	0.57	0.32	0.23	0.24	0.45	0.47	0.54	0.13	0.52	0.59	0.11	0.29	0.2	0.07	0.1	0.69	0.15	0.27	0.22	0.18	0.31	0.21	0.1	0.11	0.68	0.34	0.5	0.44	0.58	0.28	0.56	0.34	0.35	0.58	0.69	0.35	0.32	0.23	0.22	0.69	0.7	0.62	0.14	0.69	0.54	0.84	0.32
chr15	10794412	0.56	0.4	0.24	0.26	0.48	0.19	0.6	0.45	0.52	0.32	0.0	0.97	0.37	0.46	0.3	0.6	0.49	0.88	0.4	0.41	0.92	0.15	0.3	0.24	0.27	0.37	0.18	0.23	0.32	0.25	0.05	0.25	0.27	0.27	0.26	0.35	0.25	0.63	0.61	0.45	0.31	0.27	0.47	0.88	0.3	0.36	0.32	0.1
chr15	10827433	0.79	0.75	0.96	0.84	0.69	0.76	0.33	0.8	0.69	0.81	0.85	0.16	0.71	0.67	0.79	0.58	0.69	0.36	0.6	0.78	0.1	0.74	0.72	0.61	0.58	0.7	0.87	0.84	0.89	0.97	0.9	0.9	0.79	1.0	0.86	0.92	0.57	0.68	0.56	0.75	0.89	0.88	0.84	0.17	0.7	0.81	0.9	0.87
chr15	10860164	0.77	0.94	0.9	1.0	0.0	1.0	0.07	0.73	0.92	0.8	0.8	0.1	0.94	0.91	0.86	0.65	0.63	0.33	0.85	1.0	0.04	0.74	0.26	0.47	0.57	0.64	0.87	0.84	0.89	0.75	0.67	0.68	0.38	0.89	0.74	0.72	0.9	0.83	0.33	0.47	0.85	0.8	0.8	0.18	0.83	0.67	0.74	0.81
chr15	10945874	0.86	0.79	0.47	0.45	1.0	0.25	0.97	0.89	0.24	0.91	0.12	0.97	0.63	0.74	0.22	0.41	0.85	0.95	0.73	0.74	1.0	0.9	0.88	0.96	0.88	0.89	0.45	0.42	0.9	0.79	0.33	0.7	1.0	0.67	0.3	0.63	0.7	0.59	1.0	1.0	0.82	0.93	0.93	1.0	0.97	1.0	0.76	0.57
chr15	11114115	0.71	0.61	0.1	0.26	0.33	0.32	0.35	0.85	0.0	0.63	0.39	0.31	0.35	0.05	0.2	0.03	0.57	0.26	0.2	0.21	0.4	0.27	0.35	0.24	0.18	0.33	0.24	0.3	0.69	0.62	0.48	0.69	0.42	0.14	0.15	0.38	0.61	0.29	0.35	0.42	0.68	0.7	0.52	0.18	0.73	0.52	0.51	0.38
chr15	12210908	0.58	0.71	0.2	0.15	0.2	0.12	0.07	0.56	0.26	0.17	0.56	0.1	0.0	0.21	0.25	0.21	0.53	0.08	0.42	0.27	0.09	0.26	0.25	0.24	0.26	0.49	0.46	0.49	0.19	0.13	0.09	0.26	0.16	0.12	0.54	0.36	0.23	0.27	0.2	0.19	0.59	0.5	0.54	0.26	0.7	0.67	0.76	0.68
chr15	14535570	0.43	0.31	0.54	0.95	0.83	0.64	0.92	0.31	0.72	0.76	0.29	0.83	0.76	0.77	0.75	0.71	0.5	0.93	0.67	0.59	0.55	0.92	0.58	0.8	0.78	0.46	0.41	0.23	0.79	0.88	0.5	0.61	0.77	0.89	0.55	0.67	0.86	0.83	0.68	0.75	0.41	0.22	0.47	0.92	0.39	0.41	0.38	0.5
chr15	17315936	0.03	0.03	0.0	0.04	0.0	0.04	0.0	0.15	0.5	0.56	0.27	0.12	0.4	0.29	0.37	0.29	0.14	0.21	0.24	0.32	0.0	0.58	0.15	0.06	0.13	0.1	0.04	0.1	0.83	0.97	0.56	0.63	0.6	0.04	0.33	0.68	0.86	0.55	0.45	0.59	0.07	0.08	0.15	0.05	0.05	0.11	0.0	0.03
chr15	18992337	0.47	0.52	1.0	1.0	1.0	1.0	1.0	0.37	0.88	0.75	0.76	1.0	1.0	0.97	1.0	1.0	0.5	1.0	1.0	1.0	0.95	0.88	0.96	1.0	0.96	0.51	0.76	0.74	0.97	0.91	0.68	0.69	0.9	0.91	0.97	0.84	0.88	0.9	0.93	0.94	0.31	0.56	0.6	1.0	0.41	0.71	0.65	0.88
chr15	21286070	0.59	0.67	0.35	0.28	0.12	0.5	0.1	0.75	0.34	0.19	0.66	0.1	0.19	0.23	0.35	0.2	0.73	0.37	0.25	0.16	0.16	0.5	0.3	0.42	0.32	0.67	0.77	0.53	0.52	0.74	0.52	0.61	0.46	0.31	0.47	0.55	0.33	0.23	0.4	0.31	0.63	0.73	0.79	0.33	0.86	0.76	0.79	0.81
chr15	24618842	0.26	0.55	0.1	0.15	0.0	0.11	0.0	0.25	0.17	0.5	0.62	0.09	0.0	0.09	0.06	0.1	0.52	0.0	0.09	0.2	0.0	0.29	0.25	0.11	0.2	0.44	0.37	0.44	0.56	0.38	0.11	0.24	0.5	0.0	0.4	0.54	0.46	0.09	0.12	0.19	0.29	0.5	0.56	0.0	0.42	0.47	0.53	0.59
chr16	2752321	0.86	0.93	0.31	0.41	0.56	0.27	0.22	0.97	0.37	0.95	0.9	0.47	0.44	0.46	0.37	0.5	0.88	0.5	0.52	0.59	0.44	0.68	0.53	0.62	0.52	0.88	0.85	0.86	0.87	0.88	0.92	0.92	0.38	0.27	0.84	0.94	0.69	0.46	0.69	0.51	0.89	0.9	0.89	0.38	0.91	0.85	0.91	0.82
chr16	3667538	0.12	0.19	0.97	1.0	1.0	1.0	1.0	0.12	0.88	0.4	0.25	1.0	0.79	0.86	0.93	0.97	0.23	0.97	1.0	0.91	0.89	0.86	0.97	0.94	0.91	0.11	0.2	0.27	0.29	0.48	0.23	0.41	0.72	1.0	0.21	0.44	0.67	0.85	0.78	0.62	0.15	0.04	0.04	1.0	0.18	0.25	0.2	0.1
chr16	6829358	0.68	0.79	0.06	0.14	0.25	0.0	0.07	0.61	0.13	0.62	0.69	0.07	0.11	0.04	0.18	0.0	0.37	0.12	0.14	0.0	0.04	0.12	0.31	0.2	0.15	0.52	0.57	0.51	0.86	0.67	0.68	0.74	0.06	0.09	0.7	0.71	0.38	0.09	0.22	0.27	0.58	0.58	0.75	0.0	0.5	0.66	0.56	0.5
chr16	8288536	0.91	0.75	0.35	0.39	0.52	0.35	0.35	0.78	0.44	0.84	0.86	0.59	0.27	0.46	0.44	0.41	0.84	0.28	0.42	0.46	0.38	0.49	0.46	0.42	0.39	0.87	0.93	0.84	0.81	0.69	0.5	0.55	0.77	0.33	0.75	0.88	0.74	0.37	0.69	0.64	0.88	0.75	0.63	0.62	0.89	0.89	0.77	0.73
chr16	8396848	0.46	0.46	0.97	1.0	0.76	1.0	0.92	0.41	0.96	0.75	0.46	1.0	1.0	0.95	1.0	1.0	0.45	1.0	1.0	0.91	1.0	0.92	1.0	1.0	0.94	0.28	0.59	0.53	0.82	0.9	0.7	0.9	0.57	0.92	0.67	0.7	0.95	0.91	0.77	0.86	0.41	0.32	0.33	1.0	0.21	0.22	0.48	0.37
chr16	8422385	0.86	0.86	0.46	0.37	0.82	0.41	0.5	0.94	0.47	0.74	0.86	0.35	0.32	0.53	0.38	0.2	0.89	0.36	0.32	0.45	0.28	0.58	0.69	0.47	0.61	0.91	0.9	0.88	0.92	0.7	0.88	0.82	0.55	0.67	0.66	0.66	0.54	0.33	0.57	0.5	0.89	0.89	0.88	0.3	0.87	0.87	0.81	0.97
chr16	8543497	1.0	0.97	0.49	0.28	0.65	0.73	0.78	0.84	0.76	0.88	0.95	0.6	0.55	0.54	0.5	0.53	0.83	0.67	0.68	0.52	0.42	0.63	0.37	0.26	0.36	0.96	0.87	0.98	1.0	0.97	0.9	1.0	0.52	0.58	0.84	0.97	0.35	0.51	0.45	0.6	0.97	0.97	0.86	0.78	0.9	0.95	0.94	0.89
chr16	13940222	0.73	0.62	0.07	0.18	0.24	0.22	0.31	0.58	0.19	0.72	0.6	0.27	0.21	0.32	0.38	0.2	0.68	0.25	0.2	0.19	0.26	0.53	0.25	0.26	0.57	0.64	0.53	0.69	0.44	0.6	0.67	0.66	0.62	0.36	0.47	0.75	0.68	0.11	0.5	0.3	0.76	0.68	0.68	0.29	0.75	0.68	0.61	0.59
chr16	13962236	0.52	0.58	0.03	0.03	0.0	0.0	0.0	0.44	0.0	0.17	0.39	0.0	0.04	0.09	0.04	0.0	0.61	0.0	0.04	0.0	0.09	0.48	0.19	0.0	0.17	0.64	0.43	0.33	0.04	0.17	0.06	0.16	0.23	0.15	0.35	0.15	0.44	0.03	0.4	0.27	0.27	0.58	0.5	0.0	0.46	0.38	0.46	0.28
chr16	14123687	0.27	0.37	1.0	1.0	1.0	1.0	1.0	0.38	1.0	0.59	0.44	1.0	1.0	1.0	1.0	1.0	0.2	1.0	1.0	1.0	1.0	0.56	0.74	0.87	0.91	0.28	0.54	0.61	0.5	0.42	0.81	0.74	0.65	1.0	0.82	0.75	0.62	1.0	0.68	0.73	0.47	0.32	0.38	0.98	0.26	0.5	0.17	0.59
chr16	14523985	0.64	0.68	0.0	0.0	0.0	0.0	0.0	0.6	0.0	0.44	0.18	0.0	0.0	0.0	0.0	0.0	0.47	0.0	0.0	0.0	0.0	0.22	0.19	0.14	0.19	0.4	0.12	0.17	0.35	0.38	0.39	0.53	0.2	0.0	0.1	0.35	0.58	0.0	0.29	0.06	0.58	0.3	0.55	0.0	0.41	0.54	0.5	0.1
chr16	15032718	0.57	0.37	1.0	1.0	1.0	1.0	1.0	0.35	1.0	0.88	0.61	1.0	1.0	1.0	1.0	1.0	0.64	1.0	1.0	0.96	1.0	0.63	0.87	0.78	0.87	0.57	0.76	0.84	0.53	0.68	0.47	0.72	0.68	1.0	0.71	0.63	0.62	1.0	0.6	0.71	0.48	0.35	0.38	1.0	0.57	0.67	0.62	0.83
chr16	15052898	0.39	0.24	0.84	0.88	0.89	0.95	0.86	0.31	0.87	0.85	0.7	0.76	0.85	0.81	0.9	0.8	0.54	0.71	0.89	0.88	0.85	0.62	0.87	0.93	0.81	0.46	0.55	0.55	0.35	0.69	0.3	0.66	0.5	0.84	0.47	0.59	0.6	0.97	0.68	0.69	0.49	0.36	0.39	0.79	0.28	0.32	0.25	0.64
chr16	15069414	0.46	0.31	0.83	0.71	0.84	0.84	0.82	0.26	0.85	0.73	0.64	0.86	0.97	0.82	0.87	0.87	0.55	0.89	0.89	0.89	0.69	0.62	0.88	0.92	0.73	0.45	0.55	0.71	0.5	0.73	0.25	0.67	0.52	0.9	0.62	0.67	0.54	0.62	0.76	0.59	0.39	0.41	0.24	0.94	0.47	0.27	0.24	0.67
chr16	15086373	0.44	0.25	0.86	0.96	0.72	0.84	0.96	0.22	0.91	0.64	0.62	0.89	0.93	0.87	1.0	0.93	0.5	0.72	0.82	0.84	0.88	0.57	0.82	0.67	0.7	0.39	0.58	0.61	0.59	0.52	0.34	0.55	0.49	0.96	0.6	0.5	0.65	0.9	0.66	0.5	0.37	0.44	0.22	0.87	0.24	0.37	0.28	0.56
chr16	15098939	0.56	0.55	1.0	1.0	1.0	1.0	1.0	0.41	1.0	0.75	0.81	1.0	1.0	1.0	1.0	1.0	0.78	1.0	1.0	1.0	1.0	0.77	0.94	1.0	0.94	0.64	0.79	0.89	0.67	0.81	0.42	0.73	0.74	1.0	0.85	0.84	0.72	1.0	0.84	0.8	0.48	0.58	0.48	1.0	0.46	0.48	0.41	0.72
chr16	15138870	0.53	0.53	1.0	1.0	1.0	1.0	1.0	0.28	1.0	0.67	0.88	1.0	1.0	1.0	1.0	1.0	0.62	1.0	1.0	1.0	1.0	0.5	0.72	1.0	0.97	0.56	0.82	0.9	0.7	0.75	0.6	0.83	0.67	1.0	0.88	0.92	0.62	1.0	0.79	0.9	0.52	0.48	0.38	1.0	0.41	0.41	0.47	0.78
chr16	15171313	0.51	0.72	0.11	0.32	0.16	0.24	0.14	0.91	0.23	0.64	0.3	0.31	0.29	0.33	0.37	0.27	0.65	0.14	0.14	0.14	0.21	0.55	0.42	0.2	0.26	0.67	0.41	0.51	0.71	0.6	0.55	0.58	0.61	0.25	0.35	0.39	0.75	0.19	0.44	0.41	0.63	0.67	0.61	0.32	0.67	0.76	0.81	0.39
chr16	15307692	0.52	0.5	0.97	1.0	1.0	0.94	0.96	0.3	0.96	0.86	0.79	1.0	0.93	0.97	1.0	1.0	0.55	0.91	0.9	0.93	0.9	0.72	0.94	0.97	0.86	0.44	0.8	0.84	0.74	0.78	0.73	0.79	0.78	1.0	0.94	0.85	0.67	1.0	0.74	0.89	0.46	0.44	0.39	1.0	0.51	0.51	0.39	0.92
chr16	15321858	0.66	0.48	0.98	1.0	1.0	1.0	1.0	0.26	1.0	0.89	0.91	1.0	1.0	1.0	1.0	1.0	0.59	1.0	0.97	1.0	0.91	0.75	1.0	1.0	0.97	0.69	0.78	0.88	0.69	0.75	0.71	0.96	0.81	1.0	0.85	1.0	0.79	1.0	0.84	0.94	0.63	0.7	0.42	1.0	0.59	0.47	0.25	0.77
chr16	16118707	0.92	0.86	0.67	0.71	0.63	0.6	0.52	0.85	0.6	0.38	0.68	0.27	0.68	0.3	0.27	0.53	0.59	0.5	0.35	0.63	0.5	0.27	0.52	0.38	0.44	0.51	0.47	0.58	0.75	0.62	0.33	0.72	0.58	0.32	0.74	0.87	0.52	0.75	0.86	1.0	0.9	0.91	0.83	0.97	1.0	1.0	0.83	0.91
chr16	16269194	0.83	0.91	0.33	0.46	0.19	0.62	0.58	0.85	0.4	0.45	0.77	0.24	0.37	0.52	0.48	0.43	0.7	0.38	0.52	0.35	0.41	0.44	0.46	0.38	0.45	0.62	0.7	0.75	0.93	0.73	0.76	0.73	0.76	0.31	0.52	0.62	0.46	0.26	0.44	0.42	0.85	0.77	0.88	0.39	0.84	0.78	0.79	0.84
chr16	16589799	0.21	0.24	0.61	0.47	1.0	0.48	0.84	0.42	0.67	0.3	0.56	0.81	0.58	0.63	0.84	0.73	0.32	0.81	0.8	0.56	0.76	0.38	0.59	0.52	0.64	0.48	0.44	0.38	0.28	0.04	0.12	0.24	0.35	0.67	0.46	0.33	0.11	0.68	0.26	0.35	0.27	0.28	0.32	0.88	0.33	0.21	0.29	0.41
chr16	19157740	0.57	0.51	0.26	0.46	0.25	0.45	0.44	0.65	0.2	0.77	0.43	0.41	0.6	0.21	0.43	0.3	0.56	0.21	0.21	0.14	0.28	0.64	0.38	0.21	0.29	0.31	0.54	0.44	0.93	0.76	0.71	0.91	0.44	0.4	0.34	0.81	0.75	0.23	0.56	0.55	0.67	0.57	0.56	0.27	0.35	0.32	0.4	0.27
chr16	22190137	0.33	0.13	0.74	0.74	0.75	0.7	0.64	0.15	0.72	0.33	0.39	0.62	0.67	0.64	0.71	0.78	0.35	0.58	0.88	0.59	0.79	0.43	0.7	0.81	0.85	0.37	0.33	0.3	0.18	0.58	0.41	0.26	0.59	0.5	0.47	0.52	0.35	0.62	0.68	0.62	0.26	0.3	0.44	0.71	0.3	0.28	0.46	0.38
chr16	23938077	0.44	0.35	0.92	0.92	1.0	0.88	0.93	0.37	0.93	0.79	0.68	0.97	0.97	0.97	0.91	0.94	0.41	0.96	0.97	1.0	0.97	0.5	0.86	0.86	0.86	0.51	0.63	0.49	0.66	0.66	0.29	0.35	0.51	0.94	0.66	0.58	0.74	0.9	0.74	0.77	0.27	0.36	0.54	0.96	0.28	0.31	0.19	0.52
chr16	24017367	0.03	0.03	0.58	0.63	0.59	0.68	0.46	0.03	0.54	0.33	0.32	0.67	0.57	0.5	0.62	0.64	0.11	0.73	0.31	0.7	0.61	0.34	0.58	0.55	0.59	0.13	0.25	0.07	0.17	0.32	0.14	0.14	0.26	0.63	0.32	0.07	0.39	0.57	0.43	0.33	0.07	0.09	0.07	0.65	0.09	0.08	0.1	0.16
chr16	24089000	0.47	0.61	0.92	0.7	1.0	1.0	0.78	0.3	0.91	0.55	0.52	0.91	0.86	0.69	0.73	0.87	0.49	0.88	0.59	0.73	0.91	0.47	0.75	0.7	0.79	0.54	0.5	0.37	0.45	0.45	0.23	0.43	0.66	0.81	0.75	0.3	0.56	0.87	0.53	0.66	0.4	0.35	0.46	0.84	0.56	0.47	0.49	0.5
chr16	24114205	0.39	0.55	0.97	1.0	1.0	0.95	1.0	0.5	1.0	1.0	1.0	1.0	1.0	1.0	1.0	1.0	0.53	1.0	1.0	1.0	1.0	1.0	1.0	1.0	1.0	0.64	0.87	0.82	1.0	1.0	0.82	0.97	1.0	1.0	0.88	1.0	1.0	1.0	1.0	0.97	0.42	0.61	0.3	1.0	0.59	0.48	0.35	0.87
chr16	24161838	0.79	1.0	0.54	0.52	0.73	0.28	0.52	0.97	0.47	0.89	0.39	0.46	0.61	0.5	0.28	0.38	0.81	0.53	0.39	0.56	0.47	0.52	0.33	0.33	0.33	0.81	0.58	0.78	0.63	0.75	0.59	0.81	0.75	0.71	0.8	0.83	0.81	0.53	0.67	0.58	1.0	1.0	0.88	0.27	0.86	0.78	0.95	0.65
chr16	24392046	0.33	0.28	0.73	0.64	0.78	0.78	0.59	0.31	0.67	0.78	0.54	0.65	0.55	0.74	0.73	0.75	0.31	0.55	0.79	0.66	0.87	0.54	0.74	0.78	0.81	0.38	0.63	0.45	0.73	0.52	0.53	0.57	0.69	0.91	0.6	0.73	0.75	0.73	0.53	0.68	0.19	0.18	0.16	0.62	0.21	0.23	0.23	0.79
chr16	24452493	0.7	0.55	0.94	0.89	1.0	1.0	0.92	0.5	0.92	0.96	0.89	0.94	0.96	0.97	1.0	1.0	0.56	0.86	0.91	0.93	1.0	0.94	1.0	0.96	1.0	0.47	0.66	0.77	0.83	0.89	0.82	0.81	0.79	1.0	0.79	0.81	0.89	0.86	0.97	0.89	0.42	0.48	0.32	0.93	0.5	0.34	0.41	0.77
chr16	24781918	0.57	0.45	0.03	0.0	0.0	0.12	0.12	0.4	0.0	0.2	0.25	0.11	0.09	0.19	0.2	0.0	0.32	0.03	0.11	0.0	0.04	0.25	0.03	0.0	0.06	0.46	0.17	0.19	0.37	0.26	0.39	0.29	0.35	0.0	0.12	0.09	0.23	0.0	0.08	0.08	0.65	0.43	0.73	0.06	0.47	0.61	0.58	0.36
chr16	27256215	0.92	0.89	0.47	0.44	0.71	0.46	0.47	0.94	0.52	0.88	1.0	0.61	0.58	0.41	0.23	0.61	1.0	0.62	0.52	0.83	0.46	0.81	0.63	0.73	0.6	0.94	0.95	0.87	1.0	0.93	1.0	0.84	0.81	0.58	0.89	0.86	0.64	0.45	0.65	0.64	0.92	0.97	1.0	0.43	0.82	0.93	0.93	0.92
chr17	339823	0.36	0.53	0.11	0.08	0.15	0.0	0.21	0.43	0.35	0.53	0.24	0.68	0.21	0.36	0.42	0.54	0.52	0.83	0.44	0.19	0.67	0.91	0.81	0.93	0.92	0.39	0.48	0.38	0.93	0.94	0.82	0.94	0.76	0.0	0.42	0.84	0.89	0.32	0.87	0.89	0.58	0.27	0.33	0.69	0.41	0.43	0.5	0.42
chr17	7598141	0.43	0.67	0.22	0.26	0.71	0.32	0.79	0.53	0.09	0.79	0.45	0.24	0.22	0.14	0.03	0.39	0.54	0.37	0.12	0.13	0.38	0.61	0.26	0.23	0.3	0.58	0.55	0.44	0.81	0.81	0.73	0.68	0.46	0.3	0.44	0.77	0.8	0.24	0.62	0.49	0.59	0.53	0.46	0.26	0.49	0.65	0.54	0.5
chr17	14092056	0.21	0.33	0.74	0.67	0.67	0.7	0.8	0.0	0.72	0.73	0.25	0.86	0.75	0.74	0.79	0.67	0.28	0.77	0.81	0.76	0.67	0.61	0.8	0.96	0.84	0.18	0.22	0.27	0.57	0.61	0.83	0.51	0.73	0.77	0.35	0.77	0.8	0.67	0.72	0.82	0.33	0.18	0.29	0.88	0.22	0.29	0.11	0.24
chr17	17730106	0.38	0.39	0.79	0.74	0.87	0.8	0.6	0.31	0.92	0.37	0.5	0.83	0.88	0.96	0.83	0.53	0.4	0.61	0.68	0.76	0.65	0.42	0.79	0.92	0.64	0.32	0.59	0.38	0.37	0.35	0.11	0.17	0.4	1.0	0.61	0.55	0.65	0.72	0.67	0.63	0.46	0.35	0.39	0.73	0.28	0.33	0.44	0.33
chr17	18548325	0.65	0.61	1.0	1.0	1.0	1.0	1.0	0.5	1.0	0.62	0.96	1.0	1.0	1.0	1.0	1.0	0.7	1.0	1.0	1.0	1.0	0.58	0.93	1.0	1.0	0.49	0.83	0.88	0.43	0.39	0.61	0.44	0.76	1.0	0.86	0.54	0.89	1.0	0.93	0.89	0.48	0.41	0.46	1.0	0.67	0.5	0.52	0.94
chr17	25279203	0.62	0.56	0.0	0.0	0.0	0.0	0.0	0.47	0.0	0.34	0.5	0.0	0.0	0.0	0.0	0.03	0.48	0.0	0.05	0.0	0.0	0.08	0.04	0.05	0.03	0.5	0.34	0.44	0.29	0.18	0.2	0.25	0.26	0.0	0.46	0.31	0.05	0.02	0.08	0.25	0.44	0.58	0.55	0.0	0.58	0.54	0.51	0.33
chr17	25481852	1.0	0.97	0.97	0.9	0.95	0.89	0.97	0.88	0.15	0.96	0.9	0.88	0.55	0.29	0.24	0.38	0.89	0.64	0.34	0.63	0.67	0.87	0.77	0.69	0.85	0.7	0.86	0.92	0.92	0.9	0.93	0.97	0.93	0.88	0.81	0.93	0.88	0.55	0.83	0.83	0.88	0.84	0.88	0.88	0.89	1.0	0.91	0.88
chr17	25501827	0.84	0.92	0.84	0.77	0.81	0.85	0.54	0.71	0.08	0.88	0.84	0.79	0.59	0.24	0.32	0.23	0.94	0.61	0.44	0.54	0.5	0.79	0.78	0.87	0.81	0.82	0.75	0.76	0.9	1.0	0.85	0.89	0.9	0.92	0.7	0.92	0.84	0.46	0.91	0.85	0.85	0.78	0.86	0.71	0.84	0.83	0.97	0.83
chr17	25811687	0.83	0.81	0.84	0.93	1.0	0.96	1.0	0.75	0.0	0.44	0.52	0.93	0.81	0.06	0.0	0.28	0.77	0.52	0.11	0.45	0.28	0.35	0.94	0.88	0.88	0.74	0.71	0.82	0.87	0.4	0.7	0.57	0.12	0.62	0.65	0.62	0.44	0.37	0.26	0.42	0.71	0.76	0.82	0.86	0.83	0.73	0.84	0.74
chr17	25867524	0.12	0.34	0.37	0.41	0.23	0.36	0.3	0.44	0.81	0.58	0.54	0.35	0.44	0.97	0.86	0.97	0.35	0.55	0.81	0.67	0.69	0.5	0.34	0.31	0.33	0.3	0.29	0.34	0.3	0.67	0.69	0.33	0.62	0.17	0.54	0.59	0.77	0.82	0.74	0.63	0.49	0.29	0.5	0.42	0.34	0.33	0.19	0.32
chr17	25938708	0.65	0.43	0.7	0.5	0.5	0.71	0.57	0.56	0.0	0.25	0.15	0.68	0.53	0.03	0.0	0.14	0.61	0.33	0.07	0.39	0.14	0.24	0.58	0.45	0.44	0.67	0.48	0.56	0.59	0.38	0.33	0.41	0.19	0.56	0.37	0.33	0.07	0.17	0.09	0.26	0.51	0.5	0.52	0.59	0.61	0.61	0.47	0.63
chr17	25959534	0.83	0.81	0.94	0.93	0.9	0.95	0.94	0.71	0.3	0.41	0.67	0.86	0.85	0.14	0.2	0.4	0.83	0.75	0.53	0.52	0.29	0.31	0.81	0.73	0.88	0.88	0.83	0.87	0.87	0.62	0.59	0.71	0.47	0.92	0.65	0.67	0.48	0.38	0.54	0.43	0.7	0.82	0.85	0.95	0.88	0.88	0.78	0.91
chr17	25981357	0.89	0.86	0.86	0.92	1.0	0.93	0.92	0.72	0.28	0.58	0.52	0.85	0.86	0.17	0.34	0.33	0.91	0.73	0.58	0.46	0.88	0.52	0.93	0.83	0.71	0.83	0.92	0.89	0.81	0.73	0.89	0.77	0.41	0.91	0.67	0.86	0.5	0.6	0.52	0.58	0.73	0.88	0.92	0.73	0.95	0.81	0.67	0.83
chr17	26090580	0.59	0.64	0.47	0.57	0.65	0.67	0.55	0.74	0.0	0.16	0.5	0.61	0.59	0.03	0.0	0.21	0.67	0.36	0.25	0.33	0.23	0.26	0.57	0.56	0.55	0.46	0.59	0.64	0.67	0.5	0.75	0.41	0.11	0.5	0.58	0.23	0.17	0.06	0.14	0.26	0.59	0.64	0.65	0.61	0.66	0.72	0.71	0.75
chr17	26103019	0.86	0.74	0.86	0.58	0.82	0.88	0.84	0.67	0.17	0.36	0.57	0.64	0.73	0.3	0.22	0.38	0.81	0.5	0.38	0.59	0.12	0.47	0.68	0.62	0.61	0.76	0.78	0.65	0.7	0.54	0.48	0.58	0.18	0.84	0.49	0.44	0.35	0.33	0.29	0.43	0.59	0.76	0.67	0.65	0.64	0.73	0.77	0.76
chr17	26192507	0.97	0.94	0.97	0.91	0.95	1.0	1.0	0.94	0.39	0.48	0.74	0.78	0.82	0.55	0.43	0.33	0.97	0.63	0.54	0.75	0.52	0.7	0.8	0.9	0.81	0.89	0.95	0.96	0.76	0.72	0.8	0.76	0.28	1.0	0.69	0.77	0.52	0.77	0.47	0.61	0.82	1.0	1.0	1.0	0.92	1.0	0.95	1.0
chr17	26242131	1.0	0.94	1.0	0.93	1.0	0.97	1.0	0.97	0.37	0.67	0.7	1.0	0.91	0.44	0.3	0.5	0.98	0.68	0.64	0.93	0.48	0.5	0.9	0.93	0.95	0.89	0.98	0.89	0.79	0.69	0.9	0.68	0.47	1.0	0.74	0.83	0.52	0.5	0.71	0.58	0.84	1.0	1.0	0.94	1.0	1.0	0.94	0.98
chr17	26253311	0.81	0.81	0.88	0.83	1.0	0.8	0.88	0.84	0.19	0.5	0.73	0.88	0.78	0.21	0.22	0.41	0.85	0.48	0.5	0.63	0.42	0.42	0.73	0.76	0.8	0.79	0.89	0.7	0.76	0.76	0.74	0.75	0.43	0.96	0.62	0.63	0.55	0.51	0.35	0.43	0.65	0.68	0.8	0.91	0.88	0.86	0.88	0.85
chr17	26264351	0.73	0.5	0.92	0.74	0.76	0.81	0.81	0.78	0.0	0.2	0.53	0.83	0.59	0.12	0.0	0.21	0.81	0.52	0.34	0.31	0.07	0.35	0.74	0.79	0.62	0.74	0.77	0.83	0.57	0.34	0.68	0.36	0.17	0.73	0.5	0.55	0.32	0.27	0.25	0.31	0.77	0.82	0.76	0.85	0.65	0.76	0.56	0.73
chr17	26281069	1.0	1.0	1.0	1.0	1.0	1.0	1.0	1.0	0.3	0.61	0.78	1.0	0.89	0.54	0.39	0.61	1.0	0.74	0.47	0.79	0.48	0.48	0.83	1.0	0.94	0.93	1.0	0.98	0.91	0.73	0.94	0.96	0.7	1.0	0.97	1.0	0.74	0.57	0.61	0.67	1.0	1.0	1.0	0.94	1.0	1.0	0.97	1.0
chr17	26347092	0.2	0.3	0.17	0.08	0.19	0.15	0.13	0.18	1.0	0.58	0.43	0.08	0.21	0.89	0.96	0.77	0.22	0.69	0.73	0.63	0.79	0.75	0.45	0.29	0.23	0.31	0.21	0.32	0.37	0.5	0.25	0.34	0.77	0.18	0.41	0.46	0.79	0.73	0.66	0.69	0.25	0.22	0.29	0.14	0.16	0.16	0.33	0.23
chr17	26393557	0.66	0.57	0.6	0.6	0.47	0.58	0.58	0.66	0.0	0.24	0.57	0.78	0.5	0.07	0.0	0.17	0.7	0.45	0.31	0.33	0.12	0.23	0.54	0.55	0.61	0.63	0.77	0.54	0.61	0.31	0.54	0.53	0.17	0.5	0.45	0.42	0.21	0.15	0.19	0.3	0.68	0.6	0.77	0.44	0.51	0.54	0.61	0.61
chr17	26895875	0.15	0.29	0.23	0.27	0.25	0.35	0.15	0.18	0.86	0.8	0.65	0.24	0.52	0.84	0.88	0.79	0.28	0.63	0.75	0.46	0.79	0.54	0.41	0.39	0.38	0.33	0.22	0.27	0.14	0.62	0.32	0.51	0.85	0.08	0.43	0.49	0.48	0.73	0.81	0.73	0.42	0.31	0.26	0.18	0.25	0.24	0.22	0.14
chr17	27005450	1.0	0.9	0.94	0.91	1.0	1.0	1.0	0.83	0.33	0.62	0.8	0.97	0.83	0.38	0.14	0.44	0.96	0.41	0.38	0.7	0.57	0.4	0.86	0.88	0.88	0.86	0.93	0.9	0.81	0.52	0.81	0.82	0.24	0.89	0.81	0.62	0.62	0.57	0.36	0.64	0.81	0.91	1.0	0.87	0.97	1.0	0.88	0.88
chr17	27065107	0.26	0.31	0.29	0.23	0.06	0.21	0.19	0.26	1.0	0.65	0.57	0.27	0.33	0.97	0.93	0.96	0.42	0.67	0.75	0.5	0.83	0.68	0.43	0.5	0.36	0.2	0.28	0.28	0.64	0.65	0.62	0.54	0.94	0.19	0.5	0.32	0.54	0.69	0.79	0.75	0.47	0.25	0.23	0.13	0.27	0.2	0.42	0.19
chr17	27166664	0.97	0.73	0.89	0.83	1.0	0.96	0.97	0.79	0.2	0.59	0.63	0.74	0.87	0.55	0.27	0.52	0.93	0.63	0.5	0.75	0.4	0.37	0.69	0.79	0.74	0.81	0.73	0.78	0.85	0.76	0.63	0.6	0.32	0.9	0.71	0.85	0.67	0.51	0.31	0.5	0.81	0.82	0.88	0.84	0.93	1.0	0.9	0.95
chr17	27185447	0.86	0.74	0.89	0.74	0.76	0.9	0.97	0.72	0.31	0.29	0.23	0.92	0.81	0.2	0.14	0.41	0.93	0.59	0.45	0.31	0.27	0.61	0.48	0.79	0.74	0.84	0.96	0.84	0.79	0.5	0.58	0.47	0.26	0.89	0.58	0.67	0.46	0.28	0.3	0.35	0.69	0.77	0.7	1.0	0.89	0.95	0.76	0.92
chr17	27247708	1.0	0.96	1.0	1.0	1.0	1.0	1.0	1.0	0.24	0.5	0.69	0.92	0.79	0.38	0.5	0.46	1.0	0.64	0.59	0.67	0.75	0.57	0.88	1.0	0.8	0.97	0.98	1.0	0.89	0.58	0.6	0.61	0.36	1.0	0.68	0.61	0.55	0.56	0.48	0.53	0.73	1.0	0.96	1.0	1.0	1.0	0.89	1.0
chr17	27284602	0.3	0.4	0.43	0.31	0.28	0.25	0.37	0.48	0.93	0.67	0.53	0.26	0.41	0.94	0.92	0.87	0.32	0.74	0.97	0.6	0.86	0.71	0.5	0.34	0.29	0.31	0.29	0.15	0.25	0.6	0.9	0.49	0.91	0.26	0.61	0.55	0.77	0.76	0.85	0.84	0.52	0.32	0.38	0.25	0.23	0.22	0.41	0.39
chr17	27305773	0.0	0.03	0.07	0.0	0.0	0.0	0.0	0.11	0.53	0.57	0.14	0.04	0.17	0.61	0.68	0.48	0.07	0.28	0.48	0.19	0.48	0.33	0.06	0.0	0.03	0.0	0.0	0.06	0.18	0.22	0.0	0.18	0.52	0.0	0.27	0.09	0.33	0.42	0.47	0.33	0.13	0.0	0.0	0.0	0.0	0.0	0.12	0.0
chr17	27365097	0.69	0.52	0.7	0.67	0.71	0.64	0.82	0.84	0.0	0.32	0.36	0.77	0.68	0.06	0.0	0.26	0.7	0.32	0.15	0.5	0.2	0.33	0.57	0.68	0.53	0.67	0.75	0.74	0.74	0.47	0.38	0.55	0.17	0.9	0.63	0.42	0.21	0.14	0.17	0.33	0.62	0.66	0.68	0.87	0.6	0.81	0.56	0.79
chr17	27394031	0.82	0.63	0.82	0.78	0.71	0.93	0.66	0.7	0.23	0.38	0.57	0.93	0.79	0.26	0.35	0.28	0.8	0.27	0.38	0.5	0.37	0.48	0.57	0.75	0.79	0.81	0.69	0.76	0.5	0.48	0.4	0.71	0.38	0.8	0.45	0.6	0.37	0.29	0.44	0.26	0.61	0.76	0.85	0.77	0.71	0.71	0.71	0.73
chr17	27433120	0.03	0.13	0.0	0.13	0.0	0.0	0.0	0.03	0.58	0.5	0.52	0.0	0.06	0.77	0.79	0.6	0.08	0.56	0.59	0.43	0.64	0.54	0.21	0.06	0.03	0.03	0.05	0.07	0.16	0.23	0.27	0.23	0.73	0.0	0.4	0.24	0.5	0.6	0.49	0.41	0.18	0.11	0.0	0.04	0.03	0.0	0.12	0.03
chr17	27469594	0.0	0.12	0.12	0.16	0.05	0.0	0.0	0.08	0.67	0.61	0.44	0.18	0.23	0.74	0.74	0.72	0.0	0.38	0.54	0.43	0.76	0.42	0.09	0.07	0.1	0.1	0.17	0.1	0.11	0.33	0.17	0.5	0.67	0.04	0.37	0.33	0.48	0.54	0.45	0.41	0.3	0.14	0.0	0.11	0.09	0.09	0.05	0.07
chr17	27494661	0.29	0.27	0.44	0.34	0.33	0.35	0.38	0.29	0.92	0.44	0.75	0.21	0.29	0.97	1.0	0.79	0.41	0.58	0.83	0.76	0.7	0.69	0.33	0.32	0.25	0.48	0.22	0.37	0.55	0.57	0.73	0.46	0.88	0.36	0.46	0.63	0.64	0.74	0.73	0.81	0.27	0.4	0.32	0.44	0.26	0.3	0.38	0.31
chr17	27543337	0.04	0.2	0.07	0.05	0.1	0.44	0.08	0.11	0.7	0.42	0.23	0.14	0.46	0.68	0.67	0.59	0.09	0.5	0.62	0.48	0.57	0.47	0.15	0.15	0.22	0.12	0.07	0.07	0.34	0.38	0.18	0.29	0.57	0.0	0.22	0.39	0.54	0.73	0.59	0.53	0.12	0.24	0.12	0.22	0.17	0.17	0.17	0.15
chr18	4542154	0.32	0.44	0.92	0.97	0.95	0.88	0.89	0.4	0.83	0.87	0.44	0.94	0.83	0.81	0.97	0.97	0.37	0.96	0.87	0.9	0.88	0.9	0.9	0.87	0.91	0.43	0.65	0.3	0.6	0.63	0.73	0.65	0.66	0.91	0.74	0.84	0.81	0.86	0.91	0.89	0.49	0.2	0.41	0.94	0.38	0.35	0.35	0.35
chr18	4679423	0.65	0.6	1.0	1.0	1.0	1.0	1.0	0.56	0.96	0.62	0.71	0.97	1.0	0.97	0.96	1.0	0.53	1.0	0.97	0.97	0.96	0.8	0.97	0.92	1.0	0.58	0.62	0.61	0.63	0.5	0.67	0.53	0.85	0.96	0.78	0.52	0.65	0.82	0.81	0.85	0.42	0.64	0.39	1.0	0.47	0.6	0.36	0.82
chr18	4781641	0.33	0.37	0.0	0.0	0.0	0.0	0.0	0.29	0.0	0.5	0.56	0.0	0.07	0.08	0.07	0.08	0.48	0.0	0.0	0.03	0.0	0.19	0.06	0.0	0.0	0.42	0.29	0.44	0.3	0.37	0.1	0.43	0.13	0.0	0.38	0.43	0.17	0.06	0.14	0.14	0.43	0.22	0.68	0.0	0.54	0.55	0.29	0.47
chr18	4817717	0.64	0.41	0.03	0.18	0.18	0.09	0.16	0.48	0.05	0.42	0.54	0.1	0.06	0.09	0.07	0.06	0.23	0.08	0.12	0.15	0.03	0.28	0.15	0.19	0.17	0.41	0.59	0.45	0.68	0.46	0.39	0.64	0.17	0.41	0.41	0.59	0.54	0.06	0.38	0.27	0.57	0.47	0.43	0.24	0.76	0.5	0.47	0.36
chr18	4946550	0.32	0.3	0.85	0.87	0.88	1.0	1.0	0.41	0.8	0.48	0.56	0.93	0.88	0.85	0.74	0.81	0.3	0.95	0.9	0.86	0.82	0.65	0.95	0.78	0.73	0.11	0.45	0.32	0.56	0.57	0.67	0.33	0.59	0.75	0.26	0.63	0.67	1.0	0.82	0.75	0.39	0.48	0.37	0.84	0.5	0.12	0.28	0.5
chr18	4995741	0.43	0.53	0.9	0.96	1.0	1.0	0.96	0.52	0.88	0.7	0.65	0.97	0.76	0.9	0.92	0.86	0.68	0.96	1.0	0.9	1.0	0.62	1.0	0.94	0.9	0.54	0.5	0.54	0.73	0.32	0.59	0.52	0.81	0.91	0.67	0.75	0.5	0.87	0.8	0.88	0.46	0.6	0.67	1.0	0.47	0.35	0.46	0.61
chr18	5070882	0.83	0.83	0.06	0.0	0.04	0.0	0.07	0.68	0.0	0.35	0.43	0.0	0.0	0.03	0.22	0.08	0.77	0.0	0.0	0.0	0.09	0.23	0.1	0.05	0.03	0.69	0.5	0.58	0.59	0.32	0.41	0.53	0.29	0.0	0.56	0.44	0.07	0.0	0.33	0.06	0.64	0.75	0.77	0.0	0.68	0.83	0.68	0.46
chr18	5401576	0.52	0.59	0.03	0.19	0.17	0.0	0.08	0.41	0.19	0.41	0.61	0.06	0.0	0.13	0.03	0.12	0.57	0.08	0.14	0.15	0.1	0.35	0.08	0.14	0.12	0.37	0.46	0.39	0.52	0.33	0.48	0.35	0.2	0.11	0.39	0.29	0.26	0.03	0.12	0.09	0.47	0.57	0.56	0.11	0.63	0.68	0.61	0.54
chr18	5413549	0.5	0.71	1.0	1.0	1.0	1.0	1.0	0.51	1.0	0.81	0.56	1.0	0.96	1.0	0.91	0.97	0.57	1.0	1.0	1.0	1.0	0.86	0.94	1.0	0.97	0.57	0.5	0.61	0.64	0.76	0.59	0.67	0.74	1.0	0.63	0.76	0.72	0.97	0.89	0.79	0.53	0.29	0.5	1.0	0.4	0.6	0.51	0.78
chr18	5641891	0.47	0.44	0.95	0.79	0.79	0.92	0.9	0.44	0.86	0.65	0.58	0.87	0.69	0.97	0.91	0.97	0.7	1.0	0.91	0.9	1.0	0.93	0.86	0.81	0.82	0.45	0.51	0.31	0.65	0.87	0.76	0.75	0.9	0.81	0.48	0.88	0.95	0.97	0.89	0.83	0.47	0.51	0.35	0.93	0.53	0.39	0.51	0.35
chr18	9244125	0.33	0.35	0.44	0.47	0.1	0.33	0.09	0.27	0.35	0.84	0.38	0.93	0.32	0.38	0.2	0.59	0.55	0.94	0.45	0.41	0.97	0.97	0.97	0.97	0.9	0.43	0.23	0.35	0.94	0.96	0.9	0.92	0.97	0.27	0.33	0.83	0.9	0.5	0.94	0.91	0.38	0.43	0.39	0.86	0.62	0.7	0.27	0.38
chr18	10670643	0.52	0.53	0.37	0.23	0.24	0.21	0.22	0.77	0.26	0.83	0.52	0.24	0.13	0.24	0.3	0.09	0.44	0.21	0.39	0.29	0.13	0.53	0.08	0.05	0.09	0.43	0.35	0.38	0.59	0.75	0.57	0.76	0.44	0.25	0.31	0.73	0.46	0.16	0.42	0.17	0.44	0.47	0.57	0.0	0.58	0.38	0.45	0.24
chr18	13281852	0.0	0.0	0.0	0.11	0.0	0.0	0.03	0.0	0.0	0.47	0.0	0.0	0.0	0.03	0.04	0.04	0.15	0.0	0.0	0.0	0.0	0.39	0.0	0.04	0.0	0.0	0.07	0.05	0.92	0.71	0.61	0.6	0.36	0.0	0.0	0.55	0.26	0.0	0.16	0.26	0.0	0.0	0.0	0.03	0.0	0.0	0.0	0.0
chr18	13308656	0.0	0.08	0.03	0.03	0.0	0.0	0.0	0.0	0.03	0.5	0.0	0.02	0.0	0.03	0.0	0.03	0.14	0.0	0.03	0.03	0.0	0.22	0.03	0.06	0.02	0.0	0.04	0.0	0.79	0.62	0.43	0.63	0.26	0.04	0.04	0.59	0.22	0.07	0.19	0.18	0.0	0.12	0.0	0.02	0.0	0.0	0.0	0.07
chr18	13324147	0.0	0.0	0.03	0.0	0.0	0.0	0.0	0.0	0.04	0.62	0.0	0.0	0.0	0.04	0.0	0.04	0.09	0.0	0.0	0.0	0.04	0.29	0.0	0.0	0.0	0.0	0.03	0.0	0.87	0.66	0.67	0.72	0.37	0.0	0.05	0.68	0.27	0.03	0.17	0.26	0.03	0.0	0.0	0.0	0.0	0.0	0.0	0.0
chr18	13350950	1.0	1.0	1.0	1.0	1.0	1.0	1.0	1.0	1.0	0.32	1.0	1.0	1.0	1.0	1.0	1.0	0.93	1.0	1.0	1.0	1.0	0.62	1.0	0.96	0.97	1.0	0.98	0.98	0.12	0.5	0.3	0.24	0.77	1.0	1.0	0.36	0.67	0.92	0.67	0.81	0.92	0.97	1.0	0.95	1.0	1.0	1.0	1.0
chr18	13362743	0.97	1.0	1.0	0.97	0.95	1.0	1.0	1.0	0.88	0.33	1.0	0.92	1.0	0.93	0.75	0.92	0.9	0.96	0.93	1.0	1.0	0.69	0.97	0.93	0.97	1.0	0.93	0.98	0.04	0.28	0.19	0.26	0.63	1.0	0.97	0.14	0.71	0.92	0.78	0.69	0.97	1.0	1.0	0.94	1.0	1.0	1.0	0.97
chr18	13397617	0.0	0.0	0.0	0.0	0.0	0.0	0.0	0.0	0.03	0.54	0.08	0.0	0.0	0.0	0.0	0.0	0.03	0.0	0.0	0.0	0.0	0.33	0.06	0.0	0.03	0.0	0.03	0.0	0.62	0.55	0.7	0.53	0.22	0.0	0.08	0.54	0.27	0.02	0.28	0.18	0.02	0.02	0.0	0.0	0.0	0.0	0.0	0.0
chr18	16652004	0.18	0.14	0.41	0.43	0.17	0.24	0.21	0.09	0.57	0.31	0.11	0.45	0.65	0.57	0.52	0.38	0.2	0.53	0.68	0.57	0.63	0.32	0.88	0.67	0.62	0.09	0.16	0.21	0.13	0.1	0.17	0.16	0.3	0.41	0.26	0.24	0.3	0.59	0.22	0.29	0.19	0.1	0.18	0.45	0.13	0.08	0.12	0.1
chr18	17025869	0.58	0.68	0.9	1.0	0.86	1.0	0.9	0.34	0.22	0.74	0.36	0.81	0.48	0.42	0.66	0.73	0.49	0.69	0.73	0.41	0.68	0.94	0.69	0.85	0.82	0.35	0.56	0.64	0.59	0.62	0.43	0.5	0.82	1.0	0.41	0.49	0.82	0.5	0.63	0.77	0.43	0.41	0.42	0.93	0.41	0.58	0.27	0.54
chr18	17041143	0.61	0.67	0.89	1.0	1.0	0.96	0.97	0.36	0.24	0.6	0.48	0.78	0.42	0.28	0.33	0.59	0.49	0.8	0.5	0.75	0.66	0.9	0.86	0.63	0.86	0.35	0.5	0.66	0.68	0.68	0.72	0.52	0.77	1.0	0.38	0.44	0.81	0.54	0.86	0.83	0.4	0.44	0.44	0.97	0.28	0.54	0.53	0.73
chr18	17189482	0.4	0.27	0.71	0.9	0.68	0.87	1.0	0.32	0.23	0.68	0.24	0.81	0.44	0.38	0.21	0.41	0.43	0.62	0.52	0.55	0.52	0.68	0.79	0.48	0.68	0.33	0.29	0.22	0.41	0.59	0.62	0.61	0.69	0.74	0.28	0.31	0.65	0.37	0.5	0.68	0.32	0.31	0.22	1.0	0.39	0.25	0.35	0.29
chr18	17227137	0.35	0.21	0.67	0.76	0.75	0.87	0.97	0.14	0.05	0.43	0.18	0.74	0.4	0.13	0.14	0.54	0.19	0.81	0.27	0.47	0.39	0.44	0.26	0.35	0.5	0.22	0.46	0.29	0.52	0.41	0.58	0.33	0.27	0.74	0.26	0.44	0.38	0.25	0.39	0.48	0.2	0.24	0.29	0.83	0.28	0.38	0.32	0.22
chr18	17263591	0.31	0.17	0.56	0.77	0.69	0.8	0.73	0.13	0.11	0.34	0.0	0.62	0.27	0.24	0.07	0.59	0.22	0.26	0.07	0.5	0.29	0.45	0.27	0.42	0.38	0.17	0.15	0.19	0.44	0.26	0.4	0.35	0.29	0.53	0.33	0.41	0.48	0.13	0.42	0.42	0.32	0.04	0.25	0.66	0.21	0.27	0.24	0.1
chr18	17334958	0.35	0.14	0.71	0.71	0.83	0.68	0.72	0.11	0.23	0.4	0.24	0.68	0.18	0.23	0.26	0.58	0.34	0.27	0.33	0.52	0.5	0.55	0.52	0.44	0.71	0.13	0.23	0.17	0.64	0.55	0.53	0.41	0.38	0.4	0.12	0.6	0.58	0.36	0.41	0.52	0.12	0.32	0.26	0.74	0.26	0.21	0.03	0.18
chr18	17369666	0.25	0.19	0.53	0.59	0.6	0.9	0.5	0.22	0.11	0.36	0.15	0.69	0.24	0.13	0.21	0.48	0.16	0.63	0.28	0.5	0.33	0.36	0.27	0.55	0.46	0.05	0.06	0.17	0.37	0.43	0.5	0.42	0.12	0.55	0.15	0.34	0.4	0.17	0.64	0.53	0.18	0.3	0.23	0.76	0.04	0.22	0.1	0.17
chr18	17420516	0.65	0.72	0.37	0.2	0.13	0.18	0.26	0.84	0.71	0.6	0.81	0.18	0.76	0.73	0.5	0.52	0.71	0.4	0.82	0.38	0.67	0.55	0.39	0.48	0.52	0.78	0.55	0.52	0.5	0.48	0.41	0.63	0.42	0.1	0.57	0.44	0.5	0.68	0.52	0.42	0.77	0.79	0.86	0.36	0.74	0.7	0.56	0.55
chr18	17450537	0.82	0.86	0.35	0.25	0.06	0.45	0.24	0.91	0.83	0.62	0.76	0.44	0.79	0.87	0.83	0.6	0.88	0.54	0.68	0.71	0.72	0.45	0.72	0.65	0.63	0.83	0.85	0.82	0.55	0.42	0.45	0.57	0.57	0.59	0.78	0.69	0.67	0.65	0.46	0.55	0.82	0.72	0.88	0.31	0.88	0.86	0.94	0.8
chr18	17657400	0.48	0.73	0.26	0.28	0.7	0.27	0.44	0.71	0.12	0.35	0.29	0.5	0.07	0.09	0.04	0.17	0.58	0.25	0.0	0.16	0.29	0.24	0.13	0.17	0.09	0.52	0.48	0.61	0.48	0.54	0.5	0.31	0.18	0.19	0.52	0.5	0.17	0.07	0.2	0.24	0.62	0.58	0.65	0.17	0.59	0.65	0.52	0.68
chr18	17675967	0.29	0.29	0.57	0.44	0.27	0.45	0.38	0.21	0.86	0.35	0.36	0.36	0.72	0.86	0.73	0.66	0.22	0.58	0.81	0.55	0.64	0.64	0.7	0.63	0.47	0.21	0.16	0.17	0.21	0.35	0.3	0.33	0.48	0.67	0.42	0.59	0.6	0.92	0.69	0.68	0.33	0.07	0.37	0.65	0.32	0.26	0.36	0.22
chr18	24036823	0.86	0.67	0.18	0.19	0.09	0.38	0.21	0.85	0.38	0.17	0.29	0.16	0.35	0.27	0.31	0.33	0.26	0.14	0.29	0.2	0.29	0.17	0.32	0.27	0.36	0.3	0.21	0.29	0.1	0.1	0.2	0.2	0.12	0.21	0.86	0.58	0.42	0.92	0.68	0.7	0.71	0.62	1.0	0.75	0.82	0.59	0.83	0.53
chr18	24348911	0.42	0.31	0.74	0.86	0.88	0.92	0.87	0.5	0.96	0.96	0.57	0.91	1.0	0.86	0.95	1.0	0.47	0.88	1.0	0.81	0.86	0.85	1.0	0.88	0.88	0.43	0.47	0.5	0.84	0.91	0.58	0.77	0.94	0.88	0.59	0.81	1.0	0.94	0.93	0.83	0.1	0.41	0.56	0.91	0.42	0.48	0.32	0.41
chr18	24941196	1.0	1.0	0.63	0.87	1.0	0.93	0.91	0.97	0.81	1.0	0.89	0.4	0.95	0.71	0.67	0.74	0.98	0.6	0.75	0.68	0.33	0.76	0.3	0.13	0.29	1.0	0.89	0.88	0.86	0.88	1.0	0.97	0.76	0.5	0.63	1.0	0.74	0.81	0.67	0.72	1.0	1.0	0.96	0.49	1.0	0.97	0.94	1.0
chr18	24990268	0.92	0.92	0.69	0.87	0.94	0.65	0.93	1.0	1.0	1.0	1.0	0.38	0.48	0.59	0.57	0.43	0.96	0.33	0.83	0.74	0.3	0.93	0.41	0.56	0.61	0.98	1.0	0.98	0.96	0.96	0.89	1.0	0.94	0.8	0.8	0.94	0.88	0.73	0.63	0.62	1.0	0.96	0.9	0.4	1.0	0.93	1.0	0.96
chr18	25056354	0.77	0.76	0.79	0.67	0.8	0.74	0.82	0.83	0.87	0.7	0.85	0.68	0.63	0.76	0.85	0.67	0.85	0.9	0.83	1.0	0.72	0.62	0.0	0.05	0.12	0.73	0.87	0.79	0.81	0.94	0.79	0.84	0.62	1.0	0.94	0.89	0.77	0.94	0.74	0.62	0.88	0.88	0.69	0.6	0.82	0.69	0.78	0.79
chr18	25097499	0.92	0.78	0.5	0.5	0.39	0.64	0.39	0.92	0.32	0.37	0.52	0.52	0.5	0.42	0.5	0.53	0.36	0.38	0.38	0.33	0.41	0.47	0.34	0.34	0.31	0.41	0.42	0.36	0.4	0.33	0.35	0.4	0.29	0.39	0.91	0.95	0.52	0.97	0.97	0.82	0.72	0.91	0.95	1.0	0.9	1.0	0.97	0.91
chr18	25412852	0.75	0.88	0.79	0.8	0.96	0.82	0.84	0.93	0.82	0.71	0.82	0.55	0.85	0.95	0.95	0.72	0.88	0.65	0.91	0.85	0.75	0.56	0.16	0.08	0.07	0.88	0.84	0.89	0.77	0.9	0.86	0.77	0.67	0.76	0.88	0.7	0.22	0.9	0.46	0.66	0.83	0.88	0.88	0.68	0.78	0.85	0.86	0.82
chr18	26700057	0.9	1.0	0.48	0.5	0.5	0.44	0.54	0.96	0.5	0.74	0.5	0.55	0.71	0.47	0.52	0.4	0.55	0.59	0.47	0.39	0.61	0.3	0.33	0.23	0.32	0.57	0.49	0.42	0.56	0.27	0.15	0.53	0.46	0.52	0.94	0.96	0.59	0.94	0.75	0.94	0.88	1.0	0.95	0.93	0.8	0.8	0.86	0.89
chr19	535481	0.2	0.24	0.36	0.05	0.25	0.17	0.3	0.21	0.36	0.15	0.38	0.85	0.26	0.53	0.47	0.71	0.4	0.79	0.43	0.43	0.83	0.54	0.71	0.77	0.91	0.12	0.45	0.39	0.36	0.5	0.27	0.26	0.57	0.33	0.33	0.26	0.44	0.2	0.54	0.61	0.25	0.36	0.25	0.71	0.42	0.21	0.41	0.21
chr19	827862	0.92	0.94	0.85	0.97	0.89	1.0	0.94	0.74	0.81	0.82	0.71	0.3	0.74	0.79	0.44	0.39	0.86	0.34	0.73	0.71	0.42	0.69	0.32	0.2	0.16	0.89	0.77	0.93	1.0	0.91	1.0	0.94	0.59	0.82	0.79	0.92	0.77	0.93	0.58	0.62	0.97	0.97	0.86	0.37	0.93	1.0	0.95	0.91
chr19	6336390	0.41	0.73	0.0	0.0	0.0	0.0	0.0	0.7	0.0	0.19	0.11	0.0	0.0	0.03	0.0	0.0	0.34	0.0	0.0	0.04	0.0	0.42	0.11	0.07	0.06	0.31	0.17	0.22	0.22	0.26	0.5	0.12	0.13	0.0	0.25	0.52	0.41	0.0	0.25	0.17	0.52	0.47	0.37	0.04	0.36	0.6	0.34	0.21
chr19	6356617	0.27	0.42	0.0	0.0	0.0	0.0	0.0	0.48	0.0	0.25	0.22	0.0	0.0	0.0	0.0	0.0	0.36	0.0	0.0	0.0	0.0	0.45	0.25	0.3	0.4	0.45	0.32	0.4	0.36	0.25	0.25	0.48	0.42	0.0	0.26	0.44	0.27	0.0	0.31	0.31	0.48	0.61	0.63	0.03	0.49	0.52	0.49	0.32
chr19	6379143	0.27	0.07	0.54	0.38	0.59	0.53	0.67	0.17	0.48	0.32	0.23	0.53	0.67	0.61	0.68	0.64	0.03	0.6	0.72	0.27	0.56	0.19	0.38	0.5	0.44	0.0	0.18	0.34	0.04	0.15	0.04	0.12	0.2	0.59	0.46	0.1	0.24	0.49	0.26	0.17	0.16	0.13	0.15	0.64	0.0	0.04	0.18	0.36
chr19	6398947	0.35	0.25	1.0	1.0	1.0	1.0	1.0	0.33	1.0	0.55	0.58	1.0	1.0	1.0	1.0	1.0	0.11	1.0	1.0	1.0	1.0	0.43	0.78	0.5	0.6	0.11	0.33	0.46	0.16	0.29	0.19	0.15	0.31	1.0	0.75	0.29	0.43	1.0	0.55	0.69	0.42	0.0	0.33	1.0	0.26	0.22	0.33	0.54
chr19	6422235	0.53	0.33	0.97	0.97	0.96	1.0	1.0	0.47	1.0	0.25	0.65	1.0	1.0	1.0	1.0	0.97	0.3	1.0	1.0	1.0	0.97	0.39	0.81	0.75	0.76	0.26	0.57	0.47	0.34	0.45	0.22	0.42	0.76	1.0	0.75	0.55	0.65	1.0	0.68	0.75	0.41	0.27	0.29	1.0	0.42	0.47	0.47	0.62
chr19	11167855	0.24	0.38	0.62	0.46	0.82	0.79	0.73	0.32	0.64	0.39	0.48	0.62	0.82	0.68	0.57	0.84	0.39	0.84	0.73	0.66	0.79	0.59	0.69	0.86	0.8	0.22	0.37	0.43	0.61	0.36	0.32	0.43	0.82	0.85	0.4	0.31	0.8	0.74	0.61	0.46	0.34	0.3	0.3	0.83	0.3	0.29	0.17	0.39
chr19	20356495	0.72	0.67	0.7	1.0	0.27	0.93	0.21	0.7	0.81	0.67	0.91	0.39	0.62	0.77	0.75	0.75	0.71	0.62	0.77	0.76	0.39	0.62	0.61	0.62	0.71	0.57	0.75	0.97	0.65	0.62	0.35	0.69	0.3	0.96	0.89	0.5	0.38	0.7	0.49	0.47	0.82	0.58	0.74	0.19	0.6	0.81	0.78	0.71
chr19	20369670	0.62	0.56	0.86	0.62	0.25	0.88	0.1	0.7	0.76	0.52	0.86	0.21	0.61	0.75	0.71	0.52	0.53	0.5	0.83	0.78	0.33	0.42	0.48	0.5	0.52	0.54	0.74	0.76	0.47	0.38	0.58	0.42	0.03	0.83	0.91	0.47	0.3	0.63	0.49	0.28	0.55	0.34	0.5	0.32	0.57	0.58	0.74	0.7
chr19	20388993	0.78	0.41	0.9	0.91	0.07	0.62	0.13	0.4	0.75	0.3	0.65	0.29	0.72	0.68	0.56	0.59	0.55	0.31	0.61	0.72	0.28	0.3	0.41	0.32	0.39	0.49	0.69	0.76	0.35	0.6	0.42	0.47	0.15	0.73	0.79	0.48	0.24	0.58	0.52	0.38	0.65	0.58	0.74	0.08	0.7	0.57	0.61	0.44
chr19	20420050	0.65	0.62	0.45	0.58	0.83	0.21	0.92	0.59	0.57	0.95	0.44	0.89	0.41	0.42	0.38	0.61	0.67	0.79	0.55	0.52	0.96	0.9	0.82	0.81	0.86	0.84	0.49	0.27	0.77	0.93	0.85	0.86	0.83	0.62	0.46	0.85	0.83	0.49	0.9	0.9	0.66	0.5	0.68	0.91	0.5	0.78	0.41	0.22
chr19	20468186	0.35	0.62	0.76	0.65	0.17	0.77	0.2	0.38	0.68	0.23	0.8	0.33	0.64	0.65	0.62	0.45	0.26	0.26	0.43	0.54	0.15	0.44	0.16	0.29	0.27	0.3	0.77	0.73	0.66	0.52	0.38	0.4	0.23	0.8	0.81	0.6	0.52	0.75	0.16	0.31	0.43	0.38	0.35	0.22	0.33	0.36	0.57	0.86
chr19	20565641	0.59	0.55	0.0	0.0	0.92	0.0	0.92	0.66	0.0	1.0	0.0	0.89	0.0	0.0	0.21	0.53	0.76	0.86	0.19	0.06	0.97	0.94	0.89	1.0	0.98	0.81	0.18	0.18	1.0	0.94	1.0	0.97	0.97	0.0	0.0	0.87	1.0	0.03	1.0	0.89	0.8	0.66	0.85	1.0	0.91	0.78	0.41	0.06
chr19	20607466	0.49	0.72	0.0	0.0	0.65	0.0	0.87	0.52	0.04	0.9	0.03	0.77	0.09	0.0	0.0	0.29	0.78	0.52	0.16	0.0	0.77	1.0	0.88	1.0	0.96	0.79	0.08	0.13	0.83	0.81	0.94	0.97	0.81	0.0	0.05	0.81	0.92	0.1	1.0	0.68	0.84	0.6	0.79	0.97	0.89	0.97	0.33	0.0
chr19	23243046	0.13	0.42	0.98	1.0	0.33	1.0	0.19	0.09	0.36	0.48	0.46	0.6	0.22	0.28	0.44	0.33	0.16	0.13	0.55	0.32	0.08	0.52	0.21	0.11	0.15	0.23	0.4	0.48	0.11	0.52	0.42	0.15	0.2	0.97	0.46	0.3	0.62	0.29	0.14	0.32	0.44	0.42	0.33	0.38	0.2	0.25	0.37	0.51
chr19	25961108	0.86	0.85	0.33	0.41	0.5	0.36	0.55	0.92	0.17	0.2	0.19	0.24	0.28	0.2	0.23	0.24	0.24	0.26	0.23	0.17	0.22	0.23	0.26	0.21	0.23	0.3	0.2	0.17	0.25	0.33	0.44	0.27	0.33	0.19	0.93	0.7	0.33	0.79	0.67	0.68	0.78	0.72	0.81	0.33	0.67	0.69	0.58	0.45
chr20	7708820	0.97	0.97	1.0	1.0	1.0	1.0	1.0	0.92	1.0	0.5	0.85	1.0	1.0	1.0	1.0	1.0	0.95	1.0	1.0	0.95	1.0	0.75	0.92	0.92	0.97	0.93	0.56	0.82	0.41	0.5	0.25	0.32	0.57	1.0	0.84	0.55	0.74	1.0	0.84	0.8	0.88	1.0	1.0	1.0	0.97	0.97	0.95	0.74
chr20	7722076	0.92	0.86	0.81	0.93	0.81	0.85	0.87	0.8	0.71	0.71	0.5	0.78	0.76	1.0	0.81	0.71	0.81	0.86	0.94	0.94	0.92	0.58	0.71	0.71	0.76	0.71	0.61	0.62	0.18	0.38	0.37	0.17	0.71	0.93	0.58	0.25	0.62	0.84	0.86	0.68	0.78	0.73	1.0	0.83	0.82	1.0	0.84	0.57
chr20	13709650	0.82	0.77	0.4	0.35	0.33	0.28	0.37	0.85	0.15	0.56	0.59	0.38	0.21	0.53	0.46	0.48	0.67	0.21	0.22	0.59	0.67	0.56	0.39	0.55	0.42	0.82	0.69	0.76	0.22	0.32	0.5	0.53	0.43	0.17	0.55	0.41	0.61	0.22	0.38	0.52	0.84	0.84	0.72	0.58	0.74	0.79	0.77	0.88
chr20	13723255	0.86	0.82	0.47	0.34	0.32	0.38	0.48	0.86	0.42	0.38	0.67	0.44	0.45	0.57	0.38	0.44	0.7	0.22	0.28	0.48	0.83	0.54	0.67	0.69	0.49	0.78	0.74	0.73	0.05	0.32	0.45	0.5	0.34	0.4	0.59	0.29	0.54	0.3	0.34	0.83	0.84	0.88	0.72	0.58	0.72	0.83	0.81	0.72
chr20	21922066	0.96	0.95	0.61	0.69	0.53	0.72	0.53	0.97	0.6	0.61	0.41	0.5	0.44	0.5	0.59	0.52	0.49	0.7	0.41	0.41	0.5	0.48	0.56	0.44	0.52	0.48	0.65	0.55	0.63	0.37	0.5	0.57	0.61	0.42	0.94	0.9	0.65	0.97	0.96	0.92	0.94	0.88	0.91	0.82	0.93	0.96	0.95	1.0
chr21	5666949	0.55	0.18	0.85	0.89	0.94	0.81	0.71	0.24	0.9	0.65	0.71	0.93	0.93	0.86	0.88	0.91	0.51	0.7	0.74	0.8	0.89	0.9	0.73	0.73	0.56	0.28	0.55	0.6	0.38	0.73	0.58	0.73	0.48	0.96	0.74	0.66	0.87	0.71	0.71	0.65	0.37	0.38	0.37	0.78	0.53	0.42	0.38	0.49
chr21	24998983	0.9	0.97	0.39	0.7	0.4	0.25	0.46	0.91	0.24	0.78	0.48	0.38	0.4	0.45	0.39	0.48	0.64	0.27	0.42	0.33	0.31	0.71	0.38	0.52	0.33	0.67	0.73	0.6	0.73	0.74	0.56	0.69	0.5	0.41	0.82	0.85	0.74	0.83	0.76	0.7	0.89	0.97	0.9	0.68	0.84	0.84	0.87	0.77
chr21	25015028	0.37	0.47	0.04	0.08	0.08	0.04	0.0	0.48	0.06	0.54	0.36	0.03	0.13	0.08	0.07	0.03	0.61	0.0	0.06	0.07	0.17	0.41	0.12	0.06	0.06	0.47	0.29	0.4	0.52	0.38	0.46	0.39	0.18	0.0	0.38	0.5	0.28	0.09	0.3	0.19	0.58	0.5	0.59	0.04	0.49	0.42	0.54	0.35
chr21	25030515	0.31	0.42	0.82	0.81	0.66	0.8	0.84	0.37	0.69	0.31	0.47	0.67	0.75	0.68	0.68	0.71	0.36	0.79	0.7	0.76	0.74	0.47	0.75	0.66	0.66	0.37	0.39	0.6	0.04	0.23	0.26	0.28	0.74	0.71	0.72	0.28	0.63	0.81	0.67	0.76	0.19	0.36	0.4	0.89	0.31	0.23	0.43	0.5
chr21	25067394	0.4	0.53	0.91	1.0	0.9	0.92	0.87	0.44	1.0	0.42	0.79	0.97	0.87	1.0	0.87	1.0	0.67	0.88	0.9	1.0	1.0	0.56	0.83	0.82	0.92	0.47	0.5	0.62	0.42	0.33	0.59	0.41	0.88	1.0	0.72	0.39	0.45	1.0	0.72	0.88	0.47	0.39	0.42	0.91	0.47	0.42	0.42	0.59
chr22	4807877	0.7	0.8	0.59	0.42	0.65	0.55	0.68	0.81	0.36	0.52	0.3	0.3	0.58	0.38	0.32	0.32	0.41	0.39	0.45	0.38	0.41	0.37	0.43	0.44	0.47	0.38	0.4	0.36	0.39	0.32	0.48	0.42	0.28	0.52	0.74	0.72	0.62	0.77	0.73	0.93	0.81	0.86	0.93	0.89	0.85	0.81	0.82	0.67
chr22	9077096	0.71	0.44	0.73	0.55	0.54	0.73	0.33	0.52	0.71	0.64	0.84	0.57	0.68	0.55	0.47	0.54	0.57	0.28	0.56	0.54	0.33	0.89	0.75	1.0	1.0	0.49	0.89	0.82	0.64	0.92	1.0	0.97	0.89	0.91	0.91	0.96	0.96	0.89	0.71	0.78	0.35	0.52	0.4	0.31	0.57	0.45	0.47	0.79
chr22	9520989	0.03	0.25	0.23	0.08	0.11	0.04	0.2	0.17	0.24	0.5	0.5	0.52	0.27	0.37	0.5	0.19	0.21	0.57	0.38	0.21	0.5	0.68	0.82	0.86	0.75	0.03	0.3	0.27	0.33	0.69	0.68	0.57	0.59	0.18	0.45	0.46	0.54	0.34	0.46	0.43	0.15	0.17	0.06	0.5	0.21	0.24	0.18	0.35
chr22	9543171	0.09	0.25	0.19	0.1	0.0	0.17	0.22	0.19	0.42	0.36	0.68	0.63	0.29	0.46	0.67	0.5	0.1	0.62	0.43	0.34	0.45	0.75	0.75	0.82	0.75	0.16	0.35	0.36	0.3	0.46	0.5	0.59	0.6	0.3	0.51	0.54	0.64	0.42	0.5	0.56	0.29	0.07	0.33	0.54	0.26	0.0	0.18	0.38
chr22	9557919	0.09	0.12	0.22	0.17	0.05	0.08	0.25	0.21	0.47	0.42	0.59	0.69	0.29	0.41	0.68	0.39	0.12	0.69	0.25	0.22	0.38	0.69	0.77	0.89	0.71	0.15	0.22	0.24	0.52	0.44	0.58	0.53	0.72	0.2	0.44	0.5	0.46	0.38	0.51	0.33	0.21	0.11	0.19	0.72	0.17	0.21	0.11	0.38
chr22	12743063	0.87	0.93	0.53	0.74	0.81	0.5	0.68	0.97	0.37	0.9	0.36	0.3	0.33	0.32	0.52	0.46	0.86	0.44	0.26	0.25	0.73	0.77	0.65	0.64	0.44	0.93	0.54	0.65	0.69	0.84	0.77	0.91	0.79	0.83	0.49	0.93	0.76	0.21	0.94	0.69	0.75	0.88	0.86	0.66	0.94	1.0	0.92	0.56
chr22	20839480	0.62	0.56	1.0	0.97	1.0	1.0	0.97	0.58	1.0	0.55	0.54	1.0	1.0	0.8	0.88	0.97	0.62	0.96	0.86	0.94	0.92	0.86	0.9	0.97	0.94	0.59	0.59	0.63	0.46	0.72	0.28	0.46	0.97	0.9	0.71	0.55	0.73	0.97	0.88	0.82	0.37	0.62	0.56	0.95	0.62	0.49	0.58	0.58
chr22	21751191	0.21	0.1	0.05	0.04	0.06	0.12	0.15	0.08	0.08	0.2	0.95	0.06	0.04	0.34	0.12	0.1	0.19	0.03	0.16	0.09	0.0	0.21	0.1	0.0	0.03	0.11	0.23	0.55	0.58	0.63	0.35	0.36	0.0	0.05	0.89	0.33	0.21	0.09	0.1	0.08	0.16	0.08	0.09	0.12	0.19	0.12	0.23	0.35
chr22	22905856	0.34	0.38	0.03	0.0	0.0	0.04	0.0	0.55	0.0	0.48	0.21	0.0	0.06	0.03	0.0	0.0	0.57	0.0	0.04	0.03	0.0	0.06	0.0	0.1	0.06	0.39	0.45	0.42	0.6	0.44	0.79	0.53	0.28	0.0	0.21	0.5	0.26	0.03	0.22	0.09	0.32	0.32	0.32	0.02	0.57	0.27	0.48	0.38
chr23	9160726	0.89	0.94	0.95	0.91	1.0	0.96	0.68	0.96	0.88	0.91	0.95	0.86	0.86	0.77	0.95	0.84	0.82	0.9	0.78	0.96	0.96	0.76	0.13	0.05	0.04	0.85	0.94	0.9	0.91	0.85	0.9	0.83	0.91	1.0	0.87	0.93	0.37	0.89	0.7	0.7	0.77	0.78	0.92	0.89	0.89	0.76	0.78	0.93
chr23	16014681	0.76	0.71	0.38	0.47	0.68	0.33	0.64	0.78	0.36	0.53	0.41	0.34	0.14	0.44	0.42	0.41	0.34	0.3	0.5	0.31	0.35	0.37	0.14	0.32	0.17	0.28	0.33	0.22	0.26	0.31	0.5	0.32	0.18	0.27	0.87	0.79	0.5	0.9	0.79	0.77	0.54	0.57	0.55	0.68	0.73	0.86	0.87	0.53
chr23	16336143	0.87	0.63	0.84	0.97	0.75	1.0	0.79	0.74	0.21	0.5	1.0	0.79	0.62	0.25	0.08	0.21	0.76	0.45	0.5	0.75	0.46	0.53	0.6	0.5	0.62	0.7	0.86	0.76	0.65	0.42	0.37	0.47	0.57	1.0	0.88	0.65	0.16	0.5	0.71	0.72	0.73	0.84	0.79	0.62	0.82	0.83	0.89	0.92
chr23	16384816	0.96	0.85	1.0	1.0	0.91	1.0	1.0	0.9	0.26	0.59	1.0	0.91	0.87	0.45	0.1	0.33	0.97	0.53	0.65	0.81	0.46	0.61	0.78	0.72	0.88	0.91	0.98	1.0	0.73	0.7	0.67	0.52	0.94	1.0	0.91	0.81	0.71	0.61	0.61	0.81	0.86	0.8	1.0	0.8	1.0	1.0	0.96	1.0
chr23	16442709	0.96	0.86	1.0	1.0	1.0	1.0	0.85	0.91	0.2	0.64	0.91	0.85	0.73	0.26	0.3	0.33	0.74	0.38	0.52	0.88	0.29	0.48	0.63	0.68	0.69	0.8	0.93	0.87	0.71	0.43	0.44	0.67	0.68	1.0	0.91	0.73	0.39	0.47	0.69	0.66	0.74	0.9	0.89	0.91	0.92	0.9	0.85	1.0
chr23	16466811	0.85	0.78	0.91	0.96	0.91	0.9	0.92	0.71	0.12	0.56	0.92	0.81	0.76	0.37	0.16	0.2	0.77	0.56	0.45	0.73	0.3	0.5	0.75	0.73	0.64	0.73	0.89	0.9	0.52	0.58	0.52	0.5	0.74	1.0	0.85	0.67	0.56	0.34	0.61	0.74	0.83	0.7	0.92	0.82	0.89	0.91	0.88	0.84
chr23	16507459	0.71	0.68	0.94	1.0	0.88	1.0	0.86	0.9	0.04	0.5	0.83	0.85	0.89	0.21	0.05	0.12	0.79	0.43	0.41	0.88	0.19	0.56	0.69	0.78	0.69	0.72	0.72	0.68	0.48	0.55	0.5	0.59	0.73	0.89	0.73	0.71	0.17	0.64	0.55	0.53	0.71	0.81	0.83	0.73	0.76	0.72	0.69	0.84
chr23	16599651	0.81	0.62	0.85	0.81	1.0	1.0	0.78	0.76	0.1	0.33	0.82	0.71	0.74	0.14	0.04	0.17	0.67	0.34	0.44	0.7	0.19	0.39	0.53	0.48	0.62	0.7	0.94	0.79	0.77	0.5	0.19	0.44	0.58	0.87	0.78	0.57	0.17	0.23	0.47	0.55	0.7	0.74	0.83	0.76	0.8	0.81	0.8	0.89
chr23	16624555	0.09	0.14	0.0	0.04	0.19	0.0	0.15	0.26	0.86	0.6	0.12	0.03	0.18	0.9	0.96	0.83	0.3	0.71	0.58	0.12	0.83	0.62	0.48	0.38	0.19	0.44	0.13	0.19	0.59	0.47	0.75	0.45	0.23	0.0	0.15	0.33	0.65	0.81	0.28	0.35	0.3	0.24	0.17	0.18	0.06	0.2	0.31	0.07
chr23	16649816	0.54	0.88	0.79	0.73	0.75	0.86	0.83	0.7	0.1	0.47	0.77	0.64	0.68	0.14	0.0	0.17	0.74	0.58	0.5	0.61	0.18	0.48	0.55	0.3	0.61	0.44	0.74	0.84	0.57	0.62	0.45	0.59	0.59	0.94	0.71	0.52	0.35	0.38	0.53	0.47	0.61	0.78	0.8	0.81	0.71	0.75	0.93	0.75
chr23	16747514	0.26	0.35	0.24	0.41	0.25	0.25	0.41	0.59	0.97	0.74	0.33	0.48	0.31	0.86	0.92	0.89	0.58	0.85	0.8	0.53	0.94	0.71	0.78	0.63	0.53	0.44	0.31	0.2	0.4	0.65	0.81	0.53	0.74	0.61	0.47	0.83	0.91	0.62	0.65	0.57	0.45	0.33	0.33	0.42	0.25	0.16	0.44	0.34
chr23	16788516	0.06	0.04	0.0	0.0	0.11	0.0	0.0	0.1	0.66	0.29	0.04	0.09	0.26	0.64	0.75	0.59	0.09	0.59	0.44	0.19	0.67	0.44	0.33	0.32	0.25	0.06	0.04	0.07	0.2	0.26	0.23	0.26	0.12	0.0	0.06	0.26	0.54	0.47	0.26	0.1	0.11	0.04	0.07	0.04	0.04	0.0	0.03	0.0
chr23	16804342	0.92	0.92	1.0	1.0	1.0	1.0	1.0	0.83	0.38	0.64	0.96	0.97	1.0	0.3	0.35	0.39	0.81	0.41	0.61	0.95	0.28	0.68	0.63	0.87	0.89	0.72	1.0	0.96	0.83	0.57	0.4	0.89	0.93	1.0	0.87	0.75	0.68	0.66	0.69	0.7	0.93	0.94	0.92	0.72	1.0	1.0	0.9	1.0
chr23	16828026	0.67	0.48	0.72	0.85	0.86	0.91	0.8	0.61	0.23	0.4	0.82	0.62	0.66	0.1	0.17	0.25	0.61	0.37	0.44	0.72	0.33	0.39	0.69	0.67	0.56	0.73	0.89	0.59	0.53	0.21	0.27	0.46	0.79	0.52	0.82	0.69	0.35	0.38	0.52	0.69	0.69	0.87	0.69	0.74	0.82	0.62	0.75	0.77
chr23	16928302	0.26	0.24	0.15	0.18	0.19	0.12	0.05	0.27	0.76	0.63	0.1	0.22	0.37	0.58	0.68	0.59	0.37	0.75	0.61	0.41	0.73	0.43	0.54	0.52	0.32	0.54	0.05	0.16	0.44	0.55	0.32	0.33	0.4	0.0	0.38	0.42	0.6	0.42	0.42	0.27	0.08	0.16	0.21	0.14	0.11	0.32	0.21	0.28
chr23	16942573	0.84	0.79	0.97	0.96	0.79	1.0	0.78	0.85	0.06	0.17	1.0	0.84	0.74	0.17	0.18	0.21	0.81	0.33	0.48	0.85	0.24	0.41	0.59	0.48	0.69	0.74	0.87	0.87	0.65	0.58	0.38	0.74	0.81	1.0	0.7	0.59	0.45	0.43	0.65	0.68	0.76	0.88	0.96	0.84	0.9	0.88	0.85	1.0
chr23	16959639	0.13	0.24	0.16	0.07	0.06	0.05	0.17	0.19	0.88	0.2	0.1	0.19	0.14	0.96	0.89	0.84	0.21	0.61	0.56	0.2	0.58	0.73	0.33	0.2	0.22	0.32	0.1	0.11	0.39	0.35	0.84	0.64	0.2	0.2	0.12	0.52	0.62	0.5	0.31	0.3	0.21	0.15	0.0	0.25	0.14	0.23	0.16	0.0
chr23	16973001	0.37	0.41	0.42	0.31	0.18	0.17	0.36	0.65	1.0	0.64	0.61	0.28	0.43	0.77	1.0	0.89	0.39	0.75	0.91	0.52	0.75	0.67	0.55	0.43	0.61	0.55	0.33	0.38	0.65	0.69	0.89	0.53	0.5	0.5	0.33	0.59	0.95	0.68	0.68	0.48	0.56	0.56	0.37	0.32	0.33	0.39	0.49	0.43
chr23	16994067	0.86	0.75	1.0	1.0	0.95	1.0	0.92	0.88	0.0	0.43	1.0	0.89	0.86	0.15	0.07	0.1	0.92	0.37	0.44	0.86	0.1	0.32	0.52	0.56	0.56	0.64	0.97	0.88	0.6	0.52	0.32	0.54	0.79	1.0	0.87	0.58	0.19	0.32	0.68	0.65	0.68	0.84	0.92	0.76	0.94	0.89	0.72	1.0
chr23	17006720	0.67	0.65	0.77	0.82	0.73	1.0	0.83	0.62	0.23	0.47	0.71	0.68	0.52	0.22	0.08	0.14	0.74	0.35	0.33	0.62	0.11	0.39	0.43	0.59	0.62	0.54	0.81	0.72	0.52	0.46	0.25	0.37	0.67	0.91	0.72	0.63	0.24	0.36	0.56	0.48	0.73	0.63	0.68	0.68	0.74	0.62	0.84	0.78
chr23	17017170	0.91	0.84	1.0	1.0	0.94	1.0	0.9	0.78	0.11	0.5	0.91	0.84	0.74	0.03	0.13	0.12	0.76	0.38	0.39	0.84	0.03	0.34	0.61	0.68	0.78	0.82	0.94	0.88	0.56	0.41	0.41	0.55	0.64	1.0	0.85	0.56	0.21	0.24	0.64	0.71	0.68	0.85	0.92	0.86	1.0	0.83	0.79	1.0
chr23	17070254	0.84	0.79	0.84	0.93	0.94	0.89	0.81	0.68	0.05	0.38	0.81	0.71	0.78	0.29	0.0	0.27	0.82	0.26	0.38	0.78	0.32	0.32	0.48	0.63	0.61	0.5	0.74	0.8	0.52	0.5	0.56	0.59	0.7	1.0	0.78	0.55	0.18	0.53	0.63	0.74	0.73	0.85	0.75	0.78	0.87	0.97	0.72	0.97
chr23	17092693	1.0	0.92	1.0	1.0	1.0	1.0	0.92	0.86	0.3	0.69	1.0	0.94	0.92	0.32	0.38	0.46	0.89	0.67	0.65	0.86	0.21	0.77	0.77	0.75	0.84	0.84	1.0	1.0	0.93	0.69	0.39	0.64	0.92	1.0	0.97	0.79	0.55	0.69	0.77	0.86	0.91	0.97	0.97	0.78	0.93	0.92	0.89	1.0
chr23	17133764	0.94	0.83	1.0	1.0	1.0	1.0	1.0	0.72	0.14	0.59	1.0	0.88	0.86	0.48	0.42	0.65	0.78	0.67	0.47	0.92	0.5	0.52	0.76	0.84	0.88	0.78	1.0	0.83	0.71	0.52	0.56	0.62	0.83	1.0	0.83	0.71	0.4	0.54	0.78	0.84	0.82	0.84	0.85	0.87	0.91	0.93	0.76	1.0
chr23	17246765	0.11	0.21	0.0	0.0	0.0	0.0	0.0	0.11	0.69	0.41	0.0	0.1	0.07	0.69	0.75	0.73	0.16	0.61	0.5	0.06	0.59	0.42	0.23	0.32	0.25	0.09	0.06	0.1	0.0	0.5	0.4	0.33	0.23	0.0	0.06	0.32	0.53	0.37	0.24	0.16	0.17	0.14	0.13	0.26	0.09	0.12	0.11	0.03
chr23	17302809	1.0	0.83	1.0	1.0	1.0	1.0	0.85	0.81	0.12	0.58	0.83	0.77	0.75	0.07	0.16	0.35	0.74	0.32	0.48	0.96	0.33	0.48	0.65	0.72	0.84	0.68	1.0	0.93	0.78	0.45	0.3	0.52	0.68	1.0	0.88	0.52	0.17	0.47	0.54	0.74	0.91	0.93	0.86	0.81	0.94	0.96	0.77	1.0
chr23	17335878	0.25	0.42	0.47	0.38	0.5	0.22	0.32	0.44	1.0	0.8	0.18	0.44	0.35	0.94	1.0	0.92	0.35	0.68	0.67	0.48	0.9	0.8	0.69	0.64	0.52	0.37	0.22	0.37	0.8	0.69	0.71	0.61	0.52	0.25	0.6	0.43	0.85	0.81	0.7	0.41	0.4	0.44	0.3	0.57	0.22	0.1	0.42	0.18
chr23	17365302	1.0	0.65	1.0	1.0	0.9	1.0	1.0	0.79	0.22	0.53	1.0	0.92	0.91	0.26	0.56	0.32	0.85	0.38	0.7	0.8	0.26	0.55	0.75	0.86	0.82	0.76	1.0	0.91	0.5	0.69	0.38	0.69	0.77	1.0	0.93	0.76	0.44	0.59	0.7	0.68	0.76	0.91	0.95	0.8	0.93	1.0	0.79	0.96
chr23	17377725	0.09	0.2	0.03	0.0	0.16	0.0	0.0	0.21	0.85	0.54	0.04	0.17	0.24	0.74	0.74	0.81	0.17	0.74	0.62	0.2	0.81	0.73	0.47	0.37	0.22	0.37	0.03	0.07	0.35	0.43	0.73	0.47	0.3	0.0	0.18	0.29	0.71	0.66	0.54	0.31	0.27	0.22	0.03	0.27	0.1	0.03	0.3	0.05
chr23	17411098	0.1	0.19	0.04	0.05	0.0	0.05	0.07	0.39	0.88	0.46	0.14	0.14	0.16	0.89	0.79	0.83	0.22	0.58	0.62	0.14	0.9	0.5	0.26	0.2	0.37	0.22	0.04	0.04	0.19	0.48	0.53	0.34	0.12	0.0	0.19	0.38	0.69	0.66	0.29	0.32	0.17	0.15	0.08	0.29	0.03	0.03	0.2	0.07
chr23	17432170	0.8	0.82	1.0	1.0	1.0	1.0	0.94	0.88	0.32	0.63	1.0	0.96	0.84	0.5	0.32	0.34	0.8	0.56	0.69	0.82	0.37	0.48	0.74	0.87	0.96	0.82	0.96	0.92	0.76	0.5	0.44	0.65	0.88	1.0	0.94	0.73	0.4	0.53	0.84	0.76	0.9	0.85	0.9	0.82	0.91	0.95	0.82	0.97
chr23	17458407	0.03	0.23	0.0	0.0	0.0	0.0	0.03	0.21	0.6	0.48	0.0	0.0	0.19	0.56	0.81	0.54	0.12	0.42	0.36	0.0	0.58	0.52	0.42	0.38	0.22	0.23	0.04	0.15	0.28	0.31	0.48	0.38	0.24	0.0	0.08	0.32	0.59	0.43	0.45	0.31	0.14	0.14	0.04	0.36	0.07	0.11	0.18	0.03
chr23	17484098	0.1	0.21	0.09	0.09	0.18	0.09	0.1	0.34	0.72	0.61	0.21	0.13	0.14	0.7	0.8	0.75	0.22	0.52	0.31	0.26	0.79	0.59	0.31	0.39	0.19	0.23	0.04	0.17	0.14	0.37	0.45	0.44	0.22	0.0	0.24	0.38	0.54	0.5	0.33	0.31	0.23	0.0	0.06	0.22	0.06	0.16	0.13	0.03
chr23	17499314	0.07	0.17	0.0	0.0	0.0	0.0	0.06	0.27	0.79	0.5	0.09	0.21	0.42	0.75	0.84	0.85	0.21	0.81	0.5	0.27	0.93	0.61	0.45	0.27	0.27	0.21	0.0	0.07	0.31	0.45	0.46	0.43	0.13	0.0	0.04	0.47	0.58	0.46	0.39	0.35	0.24	0.03	0.0	0.21	0.0	0.05	0.1	0.04
chr23	17542371	0.23	0.15	0.05	0.0	0.12	0.05	0.15	0.34	0.74	0.7	0.14	0.16	0.27	0.86	0.81	0.67	0.29	0.52	0.52	0.42	0.82	0.5	0.54	0.41	0.36	0.43	0.17	0.2	0.29	0.56	0.48	0.43	0.21	0.43	0.21	0.31	0.69	0.61	0.41	0.38	0.28	0.21	0.24	0.36	0.19	0.16	0.28	0.04
chr23	20137604	0.91	0.88	0.82	0.84	0.85	1.0	0.93	0.9	0.27	0.93	0.9	0.61	0.45	0.42	0.29	0.34	0.9	0.46	0.19	0.4	0.72	0.93	0.77	0.79	0.76	0.8	0.83	0.87	0.88	0.77	0.83	0.94	0.88	0.84	0.82	0.79	0.88	0.33	0.75	0.63	0.84	0.75	1.0	0.46	0.91	0.82	0.79	0.84
chr23	20182586	0.34	0.35	0.69	0.89	0.8	0.88	0.66	0.26	0.19	0.44	0.42	0.78	0.54	0.09	0.25	0.39	0.44	0.52	0.21	0.34	0.71	0.47	0.79	0.86	0.91	0.41	0.45	0.52	0.3	0.47	0.17	0.32	0.32	0.77	0.38	0.57	0.58	0.43	0.65	0.69	0.42	0.31	0.62	0.72	0.51	0.3	0.39	0.48
chr23	20729797	1.0	1.0	1.0	1.0	1.0	1.0	1.0	1.0	0.83	0.39	1.0	1.0	1.0	0.93	1.0	1.0	0.97	1.0	0.97	0.94	0.97	0.52	1.0	1.0	1.0	0.9	0.94	0.91	0.25	0.48	0.61	0.34	0.67	1.0	1.0	0.37	0.58	0.87	0.83	0.73	0.88	0.96	1.0	1.0	0.97	1.0	0.98	1.0
chr23	21961150	0.74	0.68	0.61	0.65	0.62	0.69	0.63	0.78	0.26	0.31	0.32	0.33	0.27	0.29	0.38	0.21	0.29	0.21	0.44	0.41	0.5	0.3	0.12	0.31	0.13	0.31	0.32	0.28	0.47	0.12	0.57	0.5	0.15	0.41	0.69	0.77	0.52	0.78	0.8	0.61	0.82	0.71	0.7	0.68	0.75	0.6	0.76	0.73
chr24	6989715	0.84	0.62	1.0	1.0	1.0	1.0	1.0	0.39	1.0	1.0	0.97	1.0	1.0	1.0	1.0	1.0	0.38	1.0	1.0	1.0	1.0	1.0	1.0	1.0	1.0	0.46	0.87	0.86	1.0	1.0	1.0	0.94	0.88	1.0	0.94	0.89	1.0	0.97	0.94	1.0	0.53	0.65	0.32	1.0	0.58	0.47	0.57	0.84
chr24	7130975	0.6	0.45	1.0	1.0	1.0	1.0	1.0	0.43	1.0	1.0	0.92	1.0	1.0	1.0	1.0	1.0	0.34	1.0	1.0	1.0	1.0	1.0	1.0	1.0	1.0	0.44	0.94	0.81	1.0	1.0	1.0	0.97	1.0	1.0	0.88	0.94	1.0	1.0	1.0	1.0	0.44	0.33	0.44	1.0	0.43	0.38	0.55	0.94
chr24	7142380	0.54	0.27	0.77	0.76	0.6	0.73	0.75	0.21	0.89	0.75	0.77	0.87	0.85	0.69	0.74	0.83	0.31	0.83	0.67	0.85	0.73	0.76	0.76	0.75	0.79	0.37	0.53	0.64	0.76	0.73	0.5	0.81	0.73	0.91	0.73	0.88	0.83	0.73	0.87	0.86	0.36	0.26	0.22	0.83	0.36	0.24	0.3	0.52
chr24	9303981	0.34	0.26	0.75	0.77	0.76	0.86	0.64	0.37	0.8	0.69	0.9	0.59	0.78	0.89	0.8	0.72	0.36	0.69	0.63	0.9	0.69	0.35	0.44	0.4	0.5	0.35	0.81	0.71	0.41	0.51	0.48	0.59	0.67	0.87	0.77	0.22	0.5	0.66	0.51	0.59	0.21	0.27	0.24	0.49	0.41	0.37	0.53	0.89
chr24	13231512	1.0	0.84	0.57	0.69	0.86	0.88	0.71	0.89	0.55	0.4	0.59	0.51	0.61	0.44	0.35	0.56	0.35	0.27	0.59	0.5	0.29	0.47	0.57	0.61	0.47	0.38	0.49	0.6	0.54	0.5	0.45	0.38	0.41	0.5	0.89	0.94	0.74	0.84	0.84	0.91	0.89	0.89	1.0	0.89	0.97	0.85	1.0	0.87
chr24	17637381	0.68	0.74	0.25	0.21	0.05	0.41	0.37	0.78	0.16	0.3	0.61	0.17	0.17	0.21	0.18	0.32	0.62	0.32	0.24	0.15	0.42	0.34	0.17	0.26	0.28	0.52	0.53	0.63	0.43	0.17	0.5	0.53	0.31	0.1	0.61	0.46	0.5	0.29	0.36	0.31	0.63	0.81	0.55	0.18	0.71	0.78	0.62	0.5
chr24	17650352	0.42	0.26	0.69	0.72	0.76	0.85	0.47	0.48	0.9	0.68	0.48	0.97	1.0	0.75	0.69	0.7	0.33	0.79	0.69	0.75	0.93	0.64	0.68	0.85	0.94	0.3	0.39	0.48	0.6	0.91	0.78	0.75	0.85	0.64	0.44	0.93	0.54	0.7	0.91	0.73	0.37	0.61	0.46	0.87	0.53	0.43	0.46	0.3
chr24	19706749	0.79	0.73	0.41	0.55	0.59	0.45	0.33	0.71	0.29	0.73	0.72	0.39	0.27	0.31	0.31	0.17	0.7	0.36	0.25	0.44	0.44	0.48	0.26	0.31	0.25	0.75	0.61	0.63	0.89	0.63	0.94	0.82	0.45	0.47	0.51	0.83	0.45	0.42	0.58	0.68	0.82	0.77	0.79	0.3	0.66	0.64	0.72	0.58
chr25	6510721	1.0	0.94	0.66	0.72	0.61	0.65	0.73	0.94	0.53	0.62	0.53	0.6	0.55	0.64	0.58	0.58	0.56	0.45	0.75	0.68	0.53	0.44	0.63	0.6	0.5	0.43	0.48	0.39	0.25	0.56	0.35	0.65	0.54	0.38	1.0	0.93	0.59	0.91	0.96	0.89	0.95	0.91	0.92	0.88	0.97	0.93	0.88	0.91
chr26	1685446	0.74	0.83	0.32	0.26	0.38	0.27	0.33	0.77	0.48	0.69	0.7	0.28	0.39	0.62	0.48	0.29	0.87	0.29	0.52	0.45	0.2	0.38	0.31	0.14	0.21	0.83	0.63	0.63	0.59	0.58	0.75	0.71	0.38	0.29	0.68	0.67	0.69	0.21	0.52	0.64	0.78	0.8	0.79	0.35	0.91	0.76	0.85	0.71
chr26	1733458	0.82	0.97	0.26	0.18	0.4	0.28	0.19	0.86	0.56	0.59	0.6	0.34	0.26	0.7	0.46	0.4	0.66	0.31	0.33	0.5	0.19	0.45	0.39	0.31	0.28	0.79	0.61	0.71	0.44	0.53	0.67	0.73	0.34	0.17	0.71	0.84	0.46	0.51	0.53	0.51	0.83	0.82	0.76	0.31	0.97	0.81	0.82	0.73
chr26	1780711	0.85	0.82	0.4	0.19	0.29	0.35	0.67	0.74	0.43	0.29	0.5	0.18	0.33	0.55	0.5	0.31	0.74	0.08	0.26	0.29	0.32	0.37	0.42	0.26	0.32	0.84	0.67	0.57	0.75	0.62	0.53	0.62	0.24	0.09	0.57	0.63	0.5	0.22	0.52	0.37	0.64	0.8	0.73	0.2	0.64	0.71	0.64	0.64
chr26	4962205	0.29	0.38	0.66	0.86	0.77	0.72	0.92	0.43	0.78	0.44	0.77	0.77	0.79	0.88	0.81	0.75	0.44	0.79	0.75	0.67	0.81	0.44	0.68	0.74	0.68	0.37	0.4	0.43	0.4	0.54	0.62	0.48	0.43	0.9	0.68	0.32	0.71	0.83	0.64	0.58	0.26	0.36	0.33	0.83	0.44	0.14	0.34	0.33
chr26	4992211	0.9	0.75	0.21	0.06	0.27	0.24	0.19	0.63	0.1	0.67	0.7	0.1	0.13	0.18	0.21	0.12	0.84	0.29	0.08	0.14	0.14	0.66	0.41	0.12	0.18	0.62	0.63	0.64	0.78	0.88	0.67	0.83	0.52	0.38	0.62	0.85	0.57	0.28	0.49	0.39	0.77	0.65	0.65	0.12	0.64	0.81	0.75	0.79
chr26	8576398	0.33	0.38	0.86	0.83	0.83	1.0	0.68	0.45	0.57	0.22	0.3	0.89	0.3	0.83	0.77	0.71	0.52	0.87	0.43	0.12	0.64	0.69	0.81	0.96	0.97	0.36	0.35	0.24	0.31	0.38	0.26	0.44	0.71	0.43	0.27	0.23	0.4	0.37	0.8	0.59	0.38	0.32	0.25	0.84	0.38	0.32	0.45	0.29
chr26	10194650	0.33	0.42	0.88	0.82	0.76	0.91	0.91	0.24	0.79	0.42	0.38	0.92	0.83	0.76	0.76	0.87	0.4	0.85	0.89	0.93	0.91	0.72	0.91	0.87	0.59	0.44	0.36	0.49	0.37	0.38	0.23	0.3	0.61	1.0	0.5	0.42	0.58	0.78	0.51	0.61	0.3	0.37	0.21	1.0	0.38	0.37	0.31	0.26
unplaced_scaffold28	160601	1.0	0.97	0.46	0.44	0.95	0.5	0.91	0.93	0.77	1.0	0.79	0.6	0.5	0.7	0.82	0.68	0.9	0.44	0.61	0.55	0.5	0.93	0.61	0.33	0.38	0.96	0.85	0.82	1.0	1.0	1.0	0.97	0.74	0.48	0.91	1.0	1.0	0.85	0.75	0.79	0.97	0.97	1.0	0.48	1.0	1.0	0.97	0.78
unplaced_scaffold29	35745	0.85	0.97	0.25	0.3	0.69	0.52	0.77	1.0	0.83	0.89	1.0	0.58	0.26	0.89	0.74	0.82	0.9	0.8	0.5	0.28	0.78	0.74	0.88	0.88	0.77	0.94	0.92	0.82	0.88	0.92	0.95	0.91	0.93	0.2	0.89	0.94	0.96	0.74	0.83	0.84	0.89	0.88	0.87	0.72	0.82	0.82	0.9	0.88
unplaced_scaffold29	61446	0.95	0.75	0.24	0.22	0.95	0.38	0.79	0.76	0.88	0.73	0.92	0.59	0.0	0.89	0.82	0.75	0.86	0.78	0.53	0.21	0.93	0.84	0.68	0.67	0.77	0.79	0.7	0.87	0.79	0.83	0.94	0.76	0.78	0.0	0.78	0.85	0.96	0.49	0.84	0.74	0.84	0.81	0.81	0.46	0.85	0.83	0.83	0.92
unplaced_scaffold41	72031	0.58	0.47	0.32	0.14	0.1	0.1	0.07	0.52	0.24	0.27	0.69	0.15	0.21	0.17	0.06	0.21	0.68	0.26	0.11	0.29	0.18	0.3	0.09	0.21	0.08	0.67	0.74	0.69	0.75	0.73	0.73	0.6	0.17	0.09	0.79	0.45	0.23	0.1	0.21	0.24	0.52	0.5	0.69	0.04	0.46	0.76	0.67	0.73
unplaced_scaffold56	2167	0.0	0.32	0.04	0.3	0.0	0.0	0.1	0.52	1.0	0.25	0.16	0.03	0.91	0.93	1.0	0.83	0.28	0.55	1.0	0.89	0.84	0.52	0.68	0.74	0.61	0.2	0.14	0.16	0.67	0.45	0.24	0.16	0.62	0.0	0.11	0.13	0.94	0.9	0.7	0.47	0.3	0.06	0.04	0.05	0.1	0.06	0.14	0.17
unplaced_scaffold56	17173	0.09	0.25	0.07	0.21	0.0	0.0	0.0	0.18	0.6	0.38	0.09	0.04	0.5	0.69	0.52	0.65	0.26	0.48	0.57	0.67	0.46	0.55	0.32	0.28	0.21	0.16	0.07	0.07	0.44	0.3	0.0	0.09	0.46	0.05	0.03	0.24	0.55	0.63	0.42	0.36	0.14	0.03	0.19	0.0	0.12	0.1	0.05	0.04
unplaced_scaffold56	85753	0.13	0.39	0.19	0.35	0.0	0.06	0.0	0.56	1.0	0.54	0.19	0.03	0.96	0.97	1.0	0.9	0.39	0.62	1.0	1.0	0.89	0.92	0.76	0.82	0.79	0.25	0.09	0.14	0.81	0.33	0.29	0.12	0.83	0.1	0.11	0.31	1.0	0.97	0.63	0.59	0.27	0.12	0.0	0.0	0.11	0.18	0.11	0.16
unplaced_scaffold56	108714	0.24	0.62	0.48	0.47	0.17	0.29	0.12	0.81	1.0	0.62	0.36	0.28	1.0	1.0	1.0	0.86	0.43	0.88	1.0	1.0	0.83	0.86	0.91	0.92	0.81	0.5	0.32	0.37	0.88	0.45	0.38	0.32	0.83	0.33	0.39	0.45	0.95	1.0	0.76	0.64	0.5	0.42	0.38	0.16	0.21	0.33	0.26	0.33
unplaced_scaffold56	127219	0.17	0.25	0.27	0.24	0.0	0.0	0.0	0.33	0.85	0.45	0.0	0.17	0.72	0.67	0.68	0.53	0.31	0.54	0.77	0.79	0.52	0.79	0.56	0.54	0.55	0.48	0.15	0.1	0.66	0.56	0.13	0.24	0.5	0.0	0.07	0.24	0.62	0.72	0.72	0.41	0.39	0.06	0.09	0.0	0.25	0.06	0.19	0.0
unplaced_scaffold79	112517	0.09	0.16	0.73	0.65	0.83	0.72	0.88	0.14	0.68	0.29	0.15	0.79	0.73	0.74	0.81	0.71	0.09	0.76	0.8	0.72	0.75	0.38	0.86	0.83	0.79	0.13	0.22	0.09	0.26	0.37	0.23	0.14	0.6	0.81	0.21	0.27	0.14	0.76	0.67	0.77	0.15	0.03	0.2	0.88	0.08	0.19	0.07	0.21
unplaced_scaffold101	1181	0.6	0.71	0.14	0.26	0.24	0.12	0.14	0.6	0.17	0.5	0.39	0.05	0.18	0.19	0.04	0.15	0.73	0.16	0.16	0.19	0.09	0.37	0.35	0.14	0.2	0.72	0.49	0.36	0.79	0.66	0.65	0.64	0.05	0.12	0.38	0.44	0.5	0.15	0.21	0.32	0.71	0.56	0.67	0.52	0.47	0.55	0.63	0.43
unplaced_scaffold153	85211	1.0	1.0	0.33	0.4	1.0	0.76	1.0	0.91	0.96	1.0	1.0	0.91	0.32	1.0	1.0	0.87	0.98	1.0	0.62	0.27	0.9	1.0	0.87	1.0	1.0	0.94	0.95	0.97	1.0	1.0	1.0	0.96	1.0	0.07	0.7	0.93	1.0	0.73	0.95	0.89	1.0	0.7	0.87	0.8	0.97	1.0	0.9	0.91
unplaced_scaffold157	32725	0.48	0.48	0.9	0.92	0.93	0.75	0.93	0.29	0.81	0.76	0.35	0.78	0.86	0.83	0.81	0.79	0.38	0.9	0.83	0.88	0.84	0.95	0.88	0.89	0.94	0.64	0.46	0.26	0.79	0.91	0.5	0.77	0.97	0.68	0.55	0.72	0.94	0.65	0.67	0.92	0.6	0.52	0.55	0.93	0.57	0.58	0.49	0.68
unplaced_scaffold160	12004	1.0	1.0	0.5	0.45	1.0	0.68	0.97	1.0	0.97	0.96	1.0	0.75	0.27	1.0	1.0	1.0	0.98	0.93	0.63	0.34	1.0	0.97	0.94	1.0	1.0	1.0	1.0	1.0	1.0	1.0	1.0	1.0	1.0	0.26	1.0	0.93	1.0	0.7	0.97	0.91	1.0	1.0	1.0	0.68	1.0	1.0	1.0	1.0
unplaced_scaffold160	29686	0.19	0.24	0.59	0.81	0.12	0.5	0.44	0.27	0.39	0.36	0.29	0.72	0.87	0.26	0.29	0.21	0.25	0.43	0.93	0.68	0.29	0.5	0.73	0.69	0.66	0.39	0.36	0.4	0.38	0.37	0.18	0.41	0.47	0.95	0.3	0.25	0.48	0.64	0.45	0.4	0.32	0.45	0.39	0.33	0.23	0.27	0.39	0.38
unplaced_scaffold182	478	0.79	0.74	1.0	1.0	1.0	1.0	1.0	0.97	1.0	0.08	0.89	1.0	1.0	1.0	1.0	1.0	0.64	1.0	1.0	1.0	1.0	0.44	0.97	1.0	1.0	0.67	0.89	0.88	0.0	0.06	0.24	0.14	0.66	1.0	0.85	0.15	0.32	1.0	0.79	0.86	0.83	0.97	0.89	1.0	0.79	0.91	0.95	0.97
unplaced_scaffold208	5723	0.95	0.87	1.0	0.93	1.0	0.92	1.0	0.91	0.0	0.48	0.77	1.0	0.88	0.03	0.0	0.21	0.96	0.62	0.27	0.55	0.24	0.31	0.92	0.93	0.84	0.91	0.93	0.88	0.87	0.62	0.7	0.61	0.23	1.0	0.65	0.81	0.46	0.47	0.24	0.33	0.82	1.0	0.96	1.0	0.93	1.0	0.89	1.0
unplaced_scaffold208	63023	1.0	1.0	1.0	1.0	1.0	0.95	1.0	1.0	0.42	0.62	0.7	0.96	0.96	0.34	0.41	0.37	0.96	0.73	0.64	0.79	0.47	0.62	0.87	0.96	0.85	0.93	0.96	0.94	0.75	0.64	0.88	0.89	0.58	1.0	0.78	0.75	0.65	0.51	0.39	0.51	0.88	0.97	1.0	1.0	1.0	1.0	0.89	1.0
unplaced_scaffold289	51	0.64	0.59	1.0	1.0	0.61	1.0	0.81	0.51	1.0	0.32	1.0	1.0	1.0	1.0	1.0	1.0	0.36	1.0	1.0	1.0	1.0	0.69	0.92	1.0	0.97	0.53	0.98	0.97	0.4	0.5	0.67	0.5	0.73	1.0	1.0	0.56	0.54	1.0	0.72	0.69	0.67	0.59	0.57	1.0	0.57	0.46	0.47	1.0
unplaced_scaffold319	21005	0.3	0.5	0.0	0.0	0.0	0.0	0.0	0.36	0.0	0.6	0.19	0.0	0.0	0.0	0.0	0.0	0.56	0.0	0.0	0.0	0.0	0.44	0.07	0.0	0.0	0.48	0.33	0.37	0.52	0.64	0.57	0.54	0.0	0.0	0.17	0.43	0.58	0.0	0.24	0.16	0.37	0.38	0.43	0.0	0.46	0.38	0.57	0.15
unplaced_scaffold320	26939	1.0	0.79	1.0	0.91	1.0	1.0	1.0	0.65	0.57	0.83	0.97	0.97	0.58	0.47	0.45	0.57	0.94	0.77	0.36	0.55	0.71	0.51	0.58	0.62	0.75	0.93	0.96	0.93	0.54	0.64	0.65	0.94	0.53	1.0	0.97	0.79	0.33	0.53	0.65	0.69	0.89	1.0	0.96	1.0	0.88	0.95	1.0	1.0
unplaced_scaffold320	56753	0.42	0.73	0.41	0.65	0.2	0.29	0.54	0.77	0.94	0.87	0.45	0.27	1.0	1.0	1.0	1.0	0.57	0.84	1.0	1.0	0.86	0.86	0.93	0.83	0.87	0.56	0.55	0.53	0.96	0.77	0.54	0.45	1.0	0.56	0.57	0.44	1.0	1.0	0.81	0.84	0.69	0.5	0.39	0.42	0.65	0.65	0.66	0.54
unplaced_scaffold387	1422	0.71	0.69	0.82	0.91	1.0	1.0	1.0	0.59	1.0	0.63	0.38	0.96	0.93	1.0	0.97	1.0	0.52	1.0	1.0	1.0	1.0	0.82	1.0	1.0	1.0	0.6	0.61	0.61	0.48	0.58	0.41	0.63	1.0	0.96	0.61	0.61	0.59	1.0	0.92	0.93	0.68	0.36	0.44	1.0	0.37	0.63	0.56	0.35
unplaced_scaffold392	2393	1.0	0.89	0.91	0.96	1.0	1.0	1.0	1.0	0.0	0.97	1.0	0.93	0.79	0.12	0.21	0.13	1.0	0.48	0.37	0.56	0.48	0.91	0.93	0.9	0.87	1.0	0.98	1.0	1.0	1.0	1.0	0.97	0.82	1.0	1.0	0.84	0.86	0.34	0.78	0.76	0.96	1.0	1.0	1.0	1.0	0.95	1.0	1.0
unplaced_scaffold397	1510	0.56	0.65	1.0	1.0	1.0	1.0	1.0	0.74	1.0	0.58	0.83	1.0	1.0	1.0	1.0	0.95	0.67	1.0	1.0	0.97	1.0	0.59	0.87	0.97	0.9	0.49	0.65	0.66	0.44	0.62	0.59	0.44	0.74	1.0	0.81	0.38	0.48	0.97	0.68	0.8	0.51	0.52	0.69	1.0	0.65	0.85	0.72	0.76
unplaced_scaffold407	2853	1.0	0.94	0.69	0.37	1.0	0.66	0.97	1.0	1.0	1.0	0.92	0.6	0.38	1.0	1.0	0.86	0.98	1.0	0.44	0.32	0.97	1.0	0.97	0.96	1.0	0.97	1.0	0.98	1.0	1.0	1.0	1.0	1.0	0.23	1.0	0.92	0.97	0.78	1.0	0.97	1.0	1.0	0.93	0.78	1.0	1.0	1.0	1.0
unplaced_scaffold407	17743	0.97	1.0	0.22	0.08	0.68	0.23	0.71	0.79	0.89	0.95	1.0	0.65	0.39	0.97	0.95	0.68	0.96	0.83	0.54	0.27	0.79	0.86	0.63	0.85	0.89	0.94	0.8	0.86	1.0	0.91	0.9	0.72	0.81	0.08	0.83	0.72	1.0	0.46	0.85	0.73	0.82	0.83	0.86	0.72	0.83	0.94	0.87	0.88
unplaced_scaffold428	36588	0.45	0.44	0.0	0.0	0.0	0.0	0.0	0.54	0.0	0.46	0.36	0.03	0.08	0.0	0.0	0.0	0.52	0.08	0.03	0.07	0.0	0.24	0.08	0.0	0.0	0.55	0.39	0.5	0.37	0.34	0.59	0.49	0.26	0.0	0.26	0.42	0.33	0.0	0.21	0.2	0.38	0.52	0.45	0.0	0.52	0.5	0.48	0.48
unplaced_scaffold572	6046	0.78	1.0	0.52	0.24	0.83	0.3	0.8	1.0	0.85	0.84	0.78	0.68	0.37	0.86	1.0	0.83	0.97	0.78	0.57	0.33	0.93	0.84	0.87	0.88	0.93	0.91	0.94	0.84	0.92	1.0	0.94	0.9	0.89	0.18	0.96	0.73	1.0	0.59	0.81	0.88	1.0	1.0	0.75	0.47	0.93	1.0	0.92	0.92
unplaced_scaffold631	16595	0.04	0.24	0.07	0.28	0.0	0.0	0.0	0.63	0.74	0.43	0.0	0.0	0.92	0.65	0.75	0.65	0.29	0.59	0.73	0.74	0.75	0.56	0.32	0.41	0.55	0.33	0.08	0.26	0.89	0.48	0.0	0.2	0.62	0.0	0.06	0.28	0.67	0.67	0.27	0.55	0.23	0.04	0.0	0.03	0.22	0.1	0.14	0.11
unplaced_scaffold640	968	0.0	0.12	0.03	0.25	0.0	0.0	0.0	0.29	0.52	0.4	0.05	0.0	0.57	0.42	0.52	0.6	0.15	0.39	0.5	0.4	0.42	0.62	0.48	0.36	0.42	0.26	0.04	0.2	0.62	0.25	0.17	0.18	0.7	0.0	0.07	0.1	0.76	0.59	0.35	0.43	0.11	0.04	0.04	0.0	0.06	0.09	0.1	0.08
unplaced_scaffold678	17282	0.36	0.5	1.0	1.0	1.0	1.0	1.0	0.45	1.0	1.0	1.0	1.0	0.96	1.0	1.0	1.0	0.71	1.0	1.0	1.0	1.0	1.0	1.0	1.0	1.0	0.62	0.87	0.95	1.0	1.0	0.95	1.0	1.0	1.0	1.0	1.0	1.0	1.0	1.0	1.0	0.57	0.5	0.48	1.0	0.46	0.52	0.51	0.88
unplaced_scaffold687	18604	0.56	0.62	1.0	1.0	1.0	1.0	1.0	0.54	1.0	0.69	0.75	1.0	1.0	1.0	1.0	1.0	0.58	0.97	1.0	1.0	1.0	0.91	1.0	1.0	1.0	0.57	0.61	0.52	0.43	0.76	0.42	0.55	0.97	1.0	0.61	0.81	0.66	1.0	0.92	0.93	0.66	0.5	0.55	1.0	0.49	0.49	0.58	0.52
unplaced_scaffold699	14448	1.0	1.0	0.97	0.96	1.0	1.0	1.0	1.0	0.21	1.0	0.96	1.0	0.93	0.15	0.25	0.3	1.0	0.69	0.31	0.71	0.57	0.87	0.83	0.85	0.92	0.98	1.0	1.0	1.0	1.0	1.0	1.0	0.88	1.0	0.97	0.97	1.0	0.42	1.0	0.84	1.0	1.0	1.0	0.97	1.0	1.0	1.0	1.0
unplaced_scaffold728	6834	0.3	0.22	1.0	1.0	1.0	1.0	1.0	0.22	1.0	1.0	0.66	1.0	1.0	1.0	1.0	1.0	0.31	1.0	1.0	1.0	1.0	0.73	0.97	1.0	0.97	0.33	0.47	0.54	0.91	1.0	0.57	0.73	0.87	1.0	0.65	0.92	0.81	1.0	0.97	0.94	0.32	0.48	0.27	1.0	0.2	0.24	0.32	0.61
unplaced_scaffold735	3106	0.38	0.46	0.53	0.7	0.33	0.48	0.37	0.52	1.0	0.75	0.41	0.47	1.0	1.0	0.96	0.97	0.57	0.69	0.97	0.97	0.92	0.75	0.93	0.93	0.94	0.57	0.41	0.48	0.88	0.78	0.38	0.39	0.91	0.19	0.38	0.57	1.0	0.95	0.8	0.72	0.5	0.46	0.35	0.27	0.5	0.44	0.35	0.45
unplaced_scaffold759	1906	0.77	0.81	0.17	0.16	0.06	0.12	0.09	0.77	0.07	0.15	0.39	0.14	0.12	0.09	0.07	0.0	0.8	0.19	0.24	0.14	0.27	0.2	0.19	0.13	0.09	0.81	0.5	0.55	0.05	0.19	0.75	0.45	0.24	0.08	0.46	0.25	0.26	0.05	0.17	0.11	0.79	0.72	0.87	0.11	0.82	0.77	0.91	0.62
unplaced_scaffold764	2204	0.59	0.53	0.0	0.0	0.0	0.0	0.0	0.76	0.0	0.59	0.23	0.0	0.0	0.0	0.0	0.0	0.55	0.0	0.0	0.0	0.0	0.39	0.07	0.1	0.2	0.64	0.32	0.31	0.42	0.44	0.5	0.46	0.38	0.0	0.18	0.39	0.59	0.0	0.12	0.13	0.66	0.59	0.73	0.0	0.58	0.4	0.7	0.5
unplaced_scaffold787	1597	0.87	0.93	0.09	0.07	0.09	0.14	0.11	0.8	0.12	0.55	0.3	0.21	0.11	0.24	0.17	0.22	0.56	0.2	0.08	0.16	0.07	0.51	0.14	0.07	0.15	0.67	0.48	0.46	0.68	0.57	0.55	0.62	0.41	0.12	0.21	0.45	0.72	0.09	0.52	0.32	0.75	0.7	0.76	0.12	0.53	0.71	0.76	0.37
unplaced_scaffold829	2087	0.16	0.3	0.24	0.09	0.21	0.21	0.22	0.36	0.9	0.73	0.19	0.29	0.19	0.76	1.0	0.85	0.4	0.6	0.57	0.59	0.91	0.48	0.58	0.48	0.39	0.41	0.1	0.21	0.32	0.55	0.76	0.54	0.52	0.17	0.39	0.52	0.88	0.72	0.47	0.55	0.28	0.4	0.18	0.35	0.31	0.27	0.25	0.17
unplaced_scaffold833	955	1.0	1.0	1.0	1.0	1.0	1.0	1.0	1.0	0.06	1.0	1.0	1.0	0.89	0.18	0.08	0.0	1.0	0.56	0.26	0.46	0.56	0.78	0.79	0.91	0.86	1.0	1.0	1.0	1.0	1.0	1.0	1.0	0.79	1.0	0.97	1.0	0.93	0.37	0.91	0.88	1.0	1.0	1.0	1.0	0.97	1.0	1.0	1.0
unplaced_scaffold904	2033	0.97	0.92	0.32	0.48	1.0	0.74	0.83	0.94	1.0	1.0	1.0	0.69	0.44	0.97	0.94	0.91	0.93	0.85	0.5	0.42	0.97	1.0	0.94	1.0	0.97	0.95	1.0	1.0	1.0	0.92	1.0	0.97	1.0	0.09	0.97	0.79	1.0	0.74	0.94	0.83	1.0	1.0	0.92	0.64	1.0	1.0	0.97	1.0
unplaced_scaffold911	5075	0.87	0.71	0.19	0.08	0.87	0.52	0.87	0.91	0.77	0.9	0.86	0.61	0.25	0.71	0.71	0.72	0.78	0.91	0.55	0.14	0.88	0.85	0.69	0.81	0.88	0.71	0.88	0.8	0.84	0.74	0.93	0.75	0.8	0.19	0.78	0.8	0.86	0.53	0.73	0.68	0.85	0.76	0.82	0.44	0.83	0.89	0.67	0.85
unplaced_scaffold916	1535	0.25	0.31	1.0	1.0	1.0	1.0	1.0	0.52	1.0	0.46	0.6	0.97	1.0	1.0	1.0	1.0	0.33	1.0	1.0	1.0	1.0	0.65	0.8	0.94	0.81	0.25	0.61	0.71	0.6	0.69	0.88	0.84	0.79	1.0	0.72	0.86	0.59	1.0	0.69	0.88	0.47	0.5	0.25	0.92	0.39	0.38	0.32	0.74
unplaced_scaffold960	1229	0.65	0.61	0.22	0.24	0.0	0.3	0.23	0.54	0.21	0.23	0.15	0.21	0.13	0.17	0.32	0.17	0.24	0.18	0.13	0.26	0.11	0.14	0.11	0.18	0.08	0.29	0.24	0.2	0.07	0.28	0.19	0.21	0.21	0.06	0.57	0.67	0.28	0.72	0.48	0.6	0.53	0.61	0.57	0.27	0.63	0.75	0.5	0.72
unplaced_scaffold1006	1519	1.0	1.0	0.94	1.0	1.0	1.0	1.0	1.0	0.14	0.9	1.0	1.0	0.83	0.08	0.16	0.04	1.0	0.67	0.32	0.47	0.57	0.81	0.84	0.86	0.7	1.0	1.0	1.0	1.0	1.0	1.0	1.0	0.81	1.0	1.0	0.86	0.8	0.47	0.85	0.81	1.0	1.0	1.0	1.0	1.0	1.0	1.0	1.0
unplaced_scaffold1142	5205	0.93	0.68	0.92	0.82	1.0	1.0	1.0	0.38	0.26	0.71	0.91	0.97	0.37	0.25	0.25	0.34	0.78	0.46	0.07	0.19	0.5	0.38	0.39	0.45	0.48	0.84	0.89	0.82	0.46	0.67	0.94	0.89	0.34	1.0	0.91	0.83	0.34	0.27	0.53	0.5	0.81	0.97	0.97	1.0	0.94	0.92	0.95	0.87
unplaced_scaffold1328	1066	1.0	0.97	0.97	1.0	1.0	0.91	1.0	1.0	0.88	1.0	0.78	0.64	1.0	0.91	0.93	0.88	0.88	0.81	0.91	0.97	0.64	0.42	0.46	0.39	0.32	0.93	0.9	0.88	1.0	0.96	1.0	0.91	0.43	0.81	0.97	1.0	0.69	0.97	0.44	0.42	1.0	1.0	0.88	0.64	0.97	1.0	0.91	1.0
[truncated: 4 more columns]
