# Supplementary figures and images for: Ecological adaptation in Atlantic herring is associated with large shifts in allele frequencies at hundreds of loci
Source: eLife journal article supplement (doi:10.7554/elife.61076), 2020-12-04

# South vs North

**a**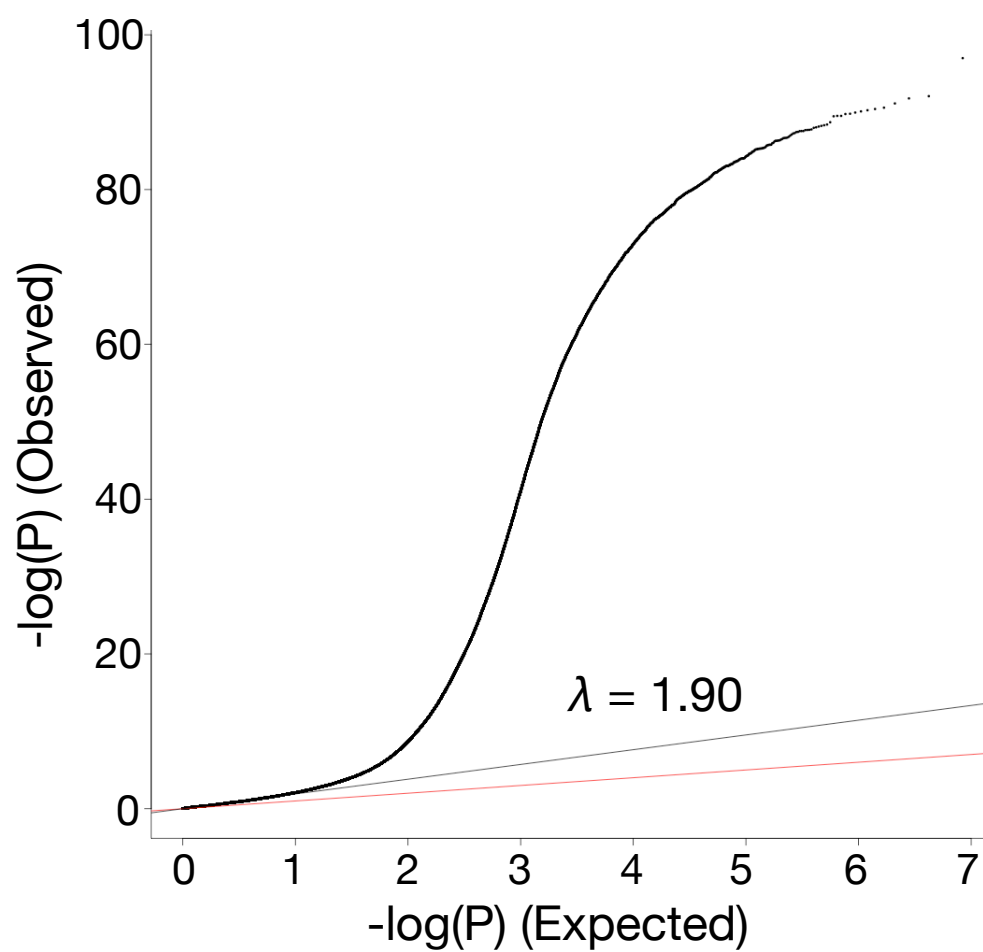**b**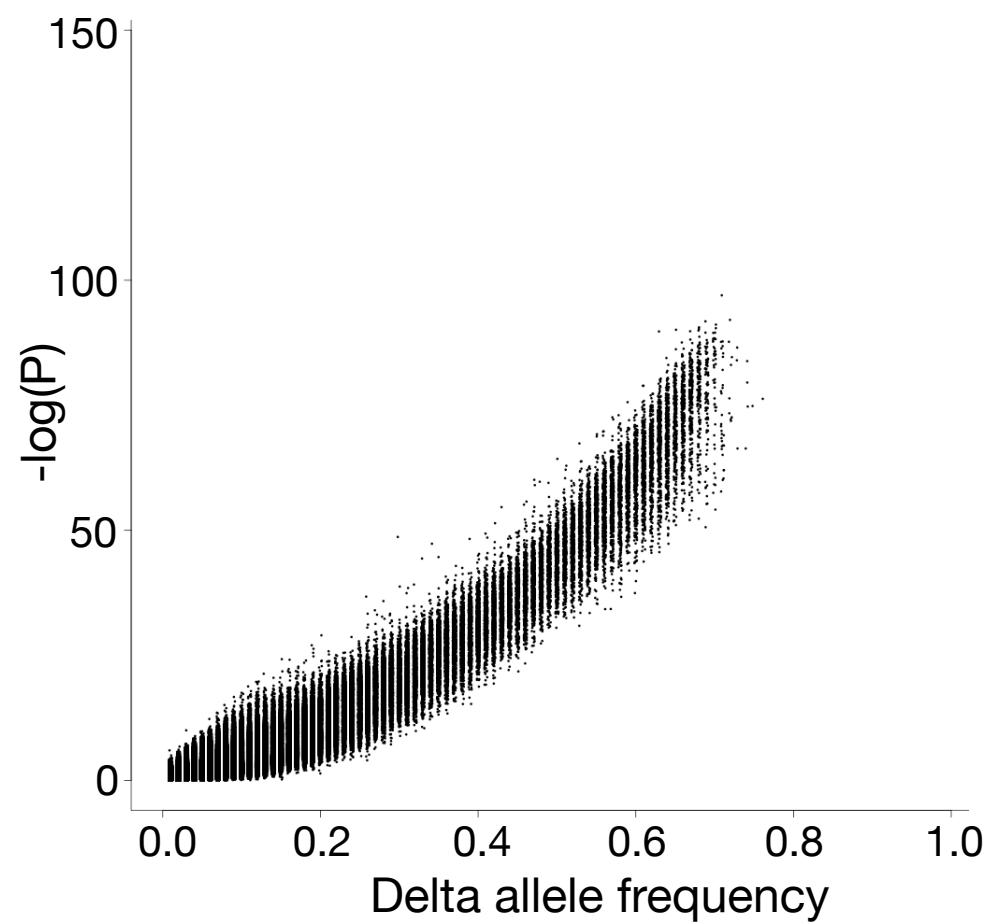**c**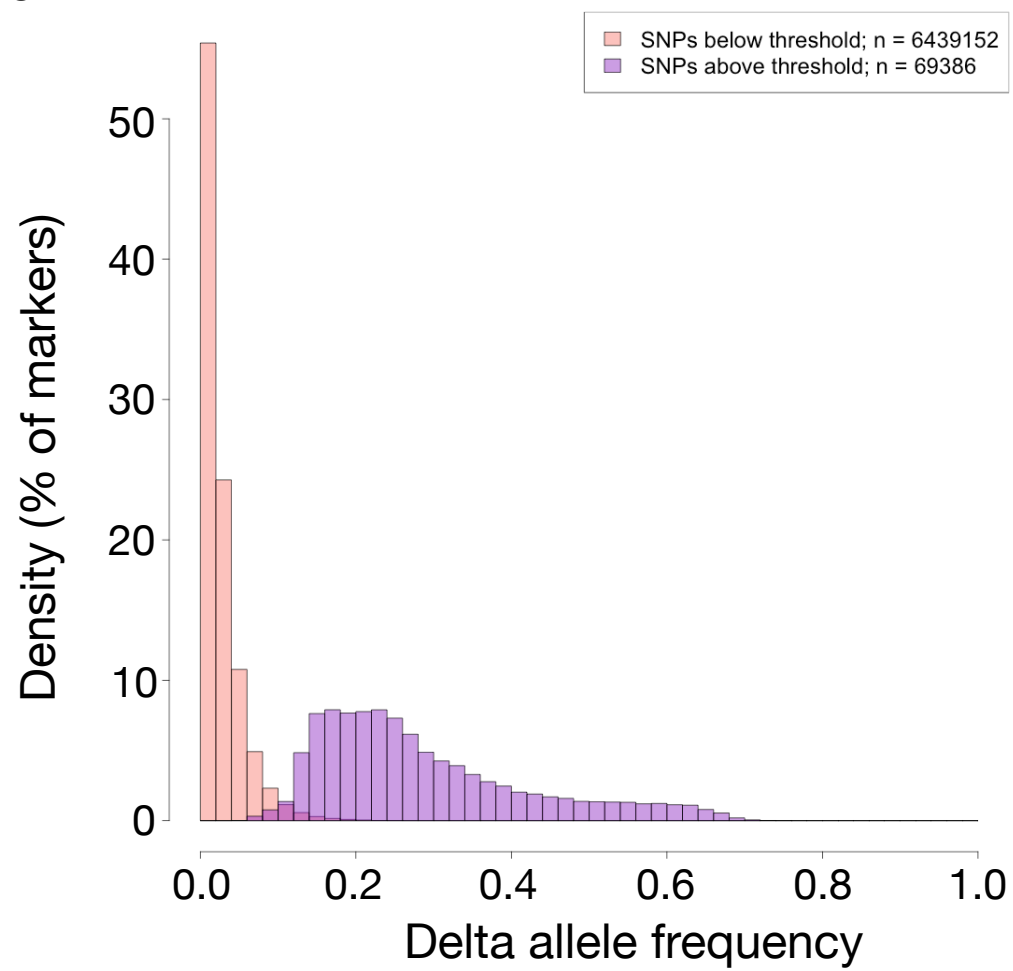

Supplement: supp [file elife-61076-supp-v1.zip]

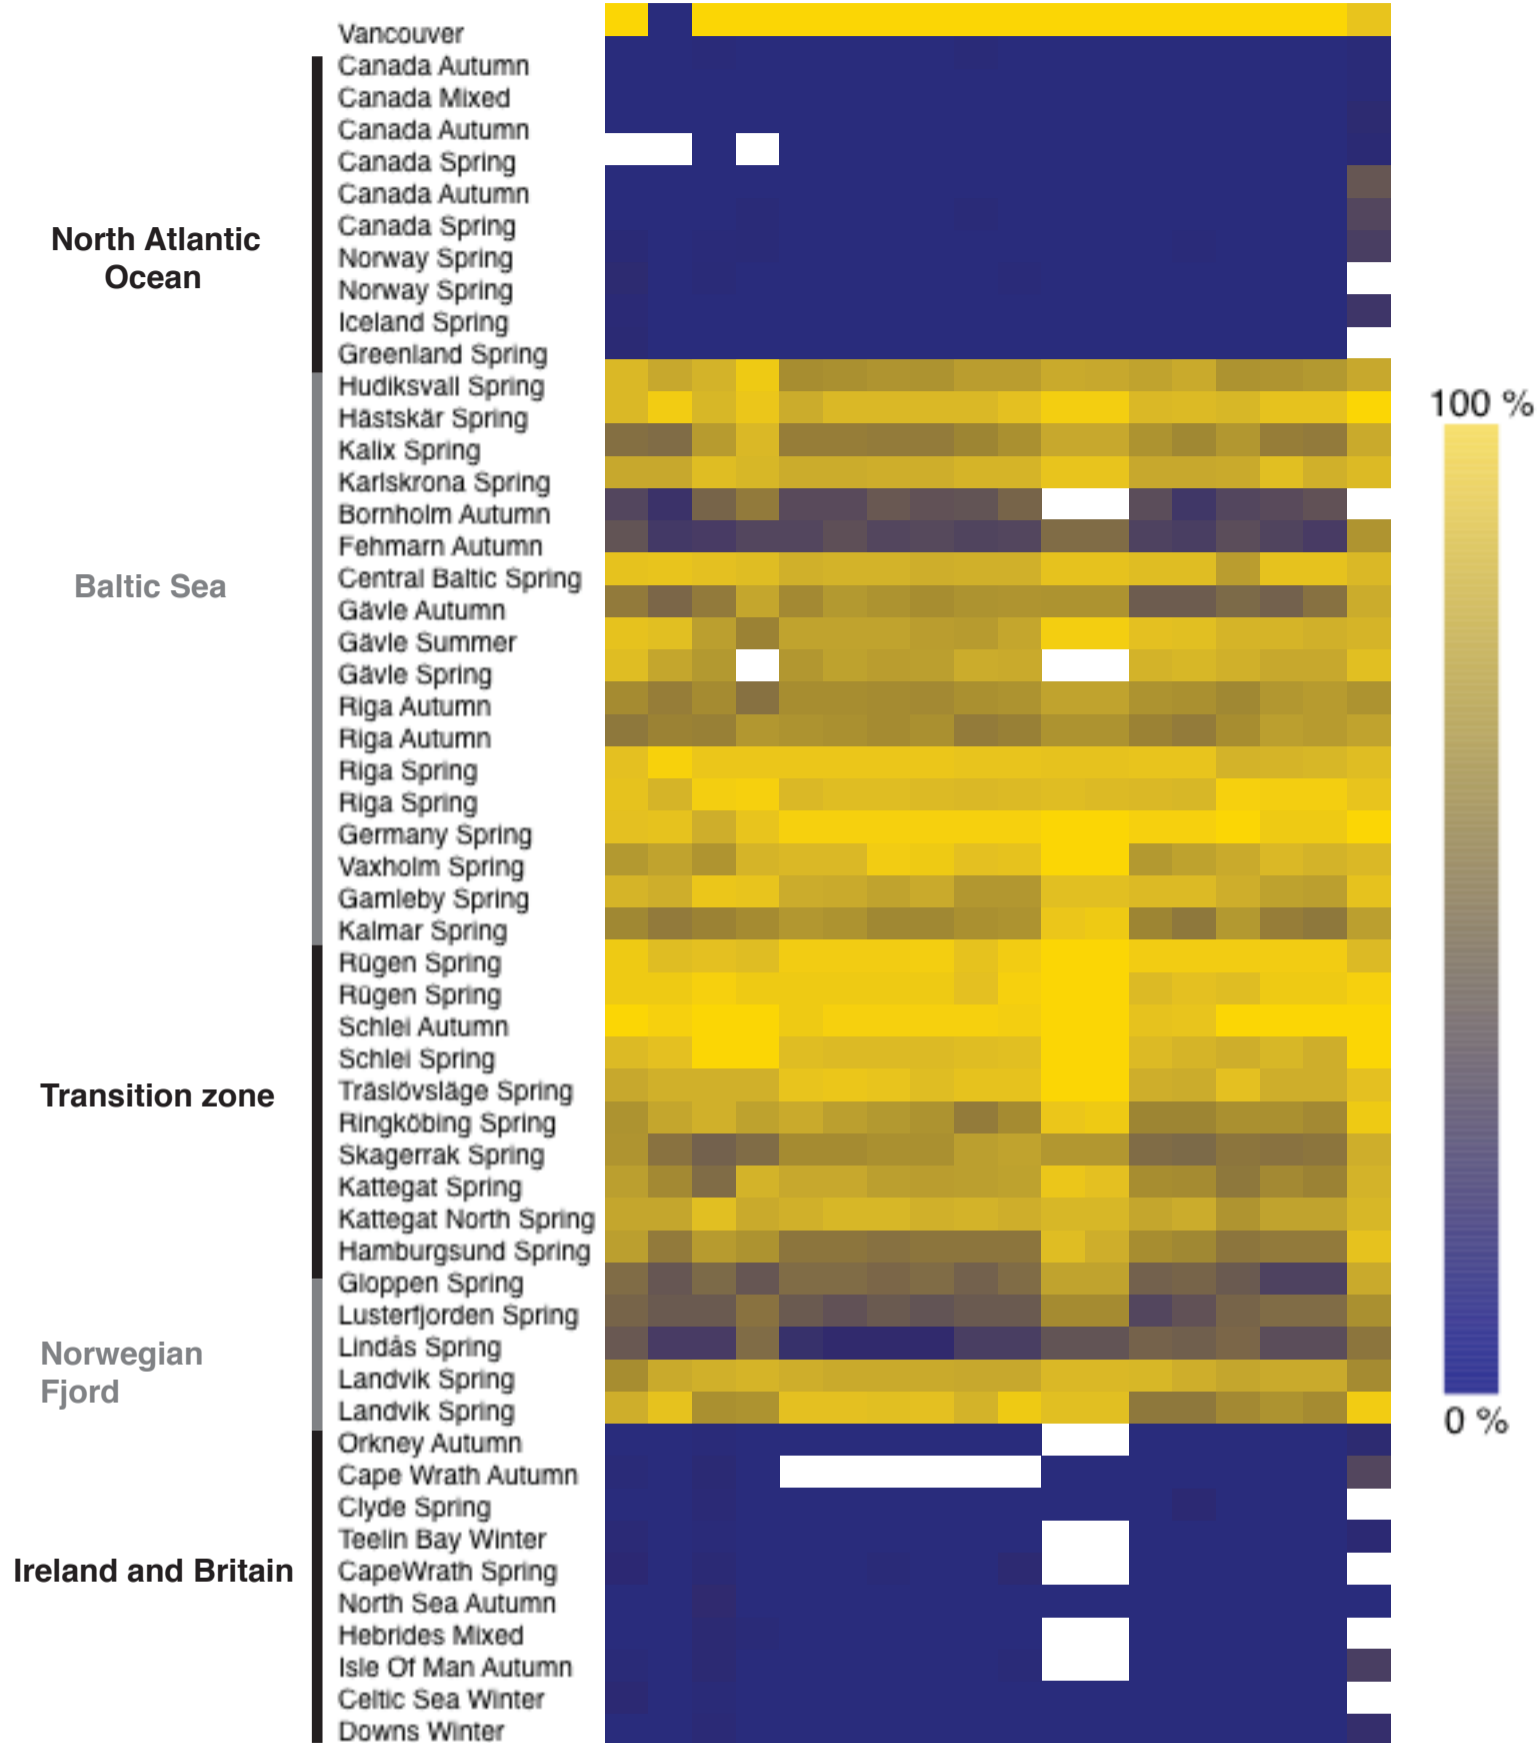

Supplement: supp [file elife-61076-supp-v1.zip]

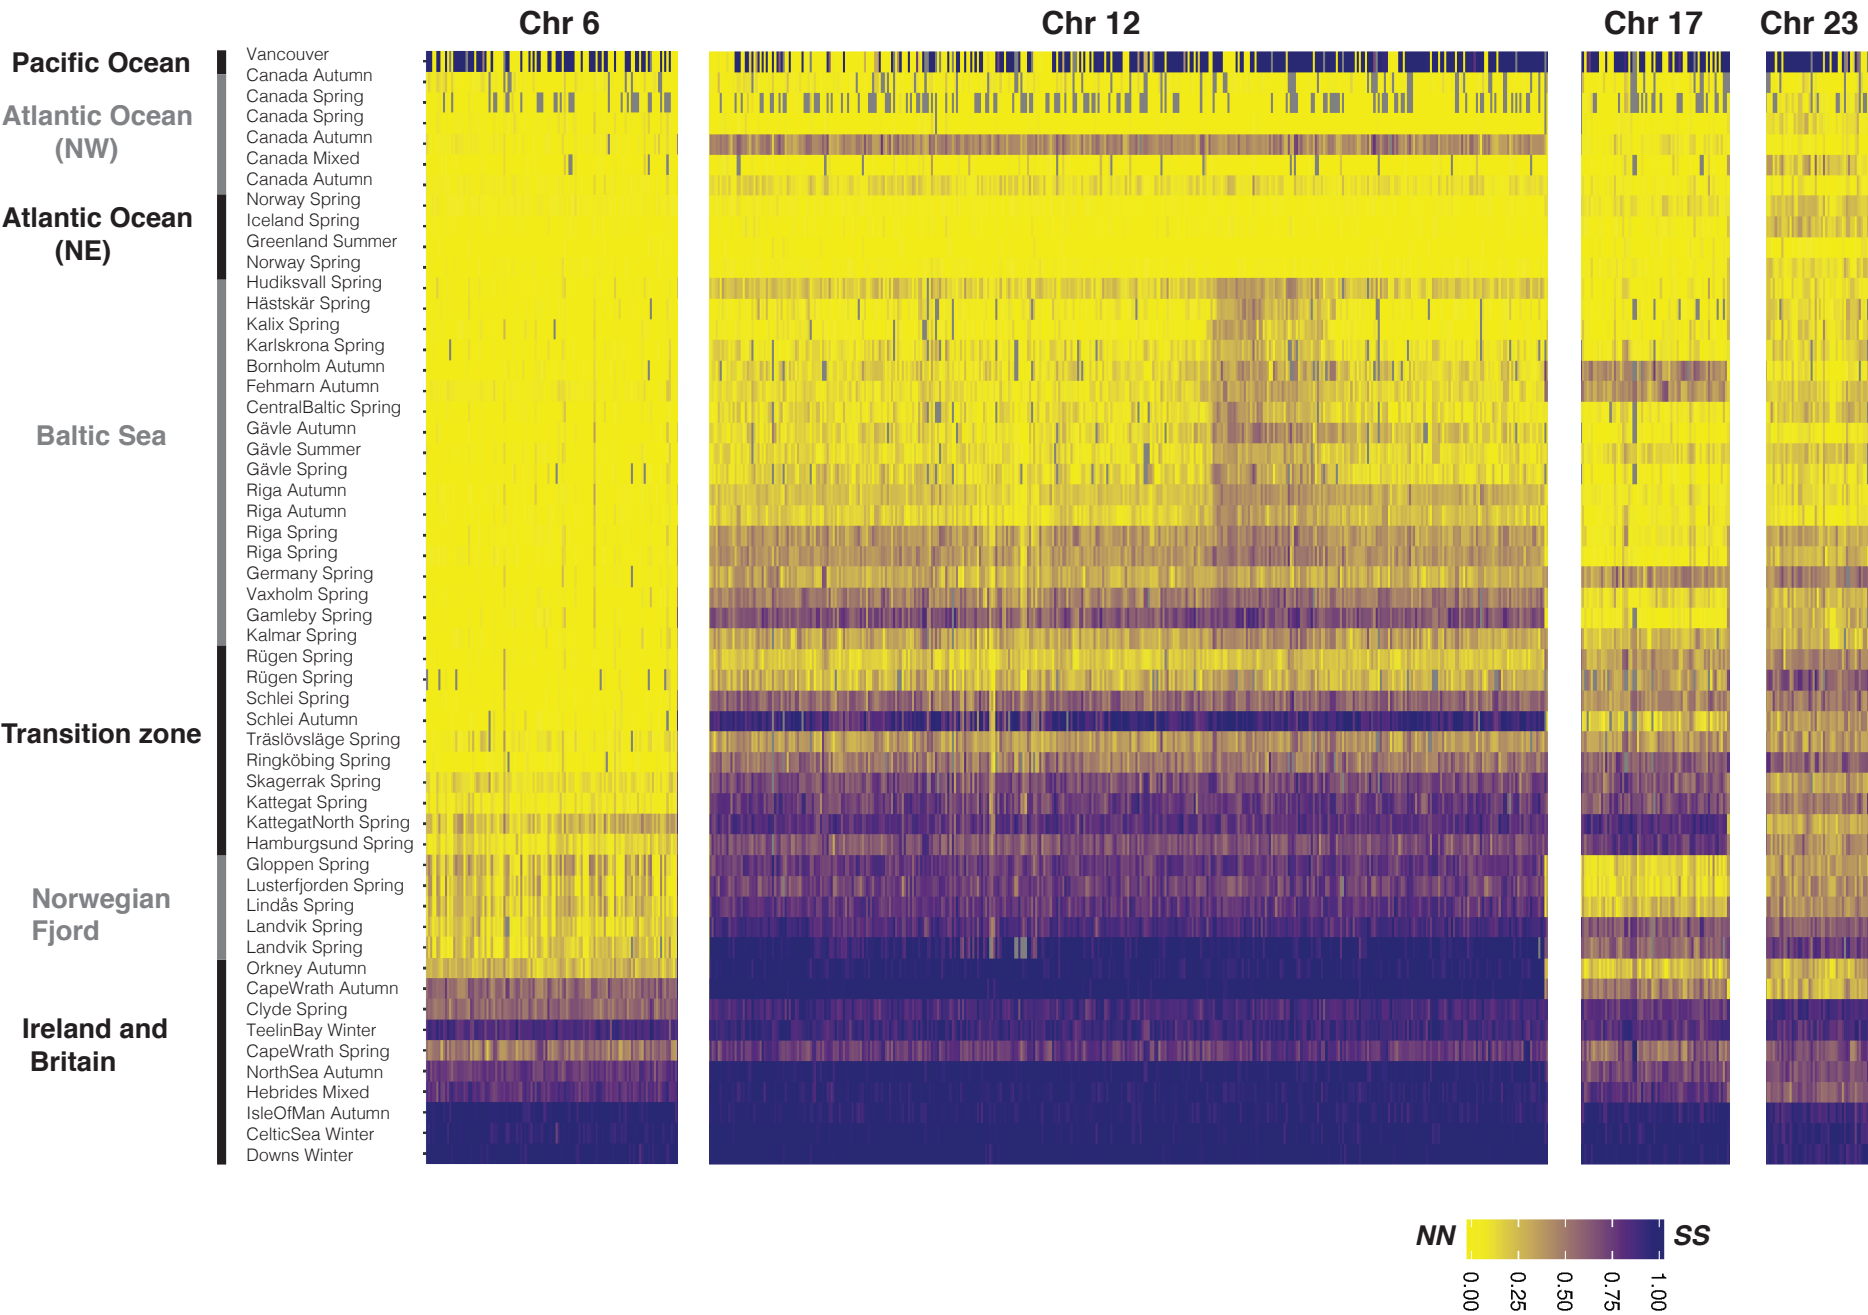

Supplement: supp [file elife-61076-supp-v1.zip]

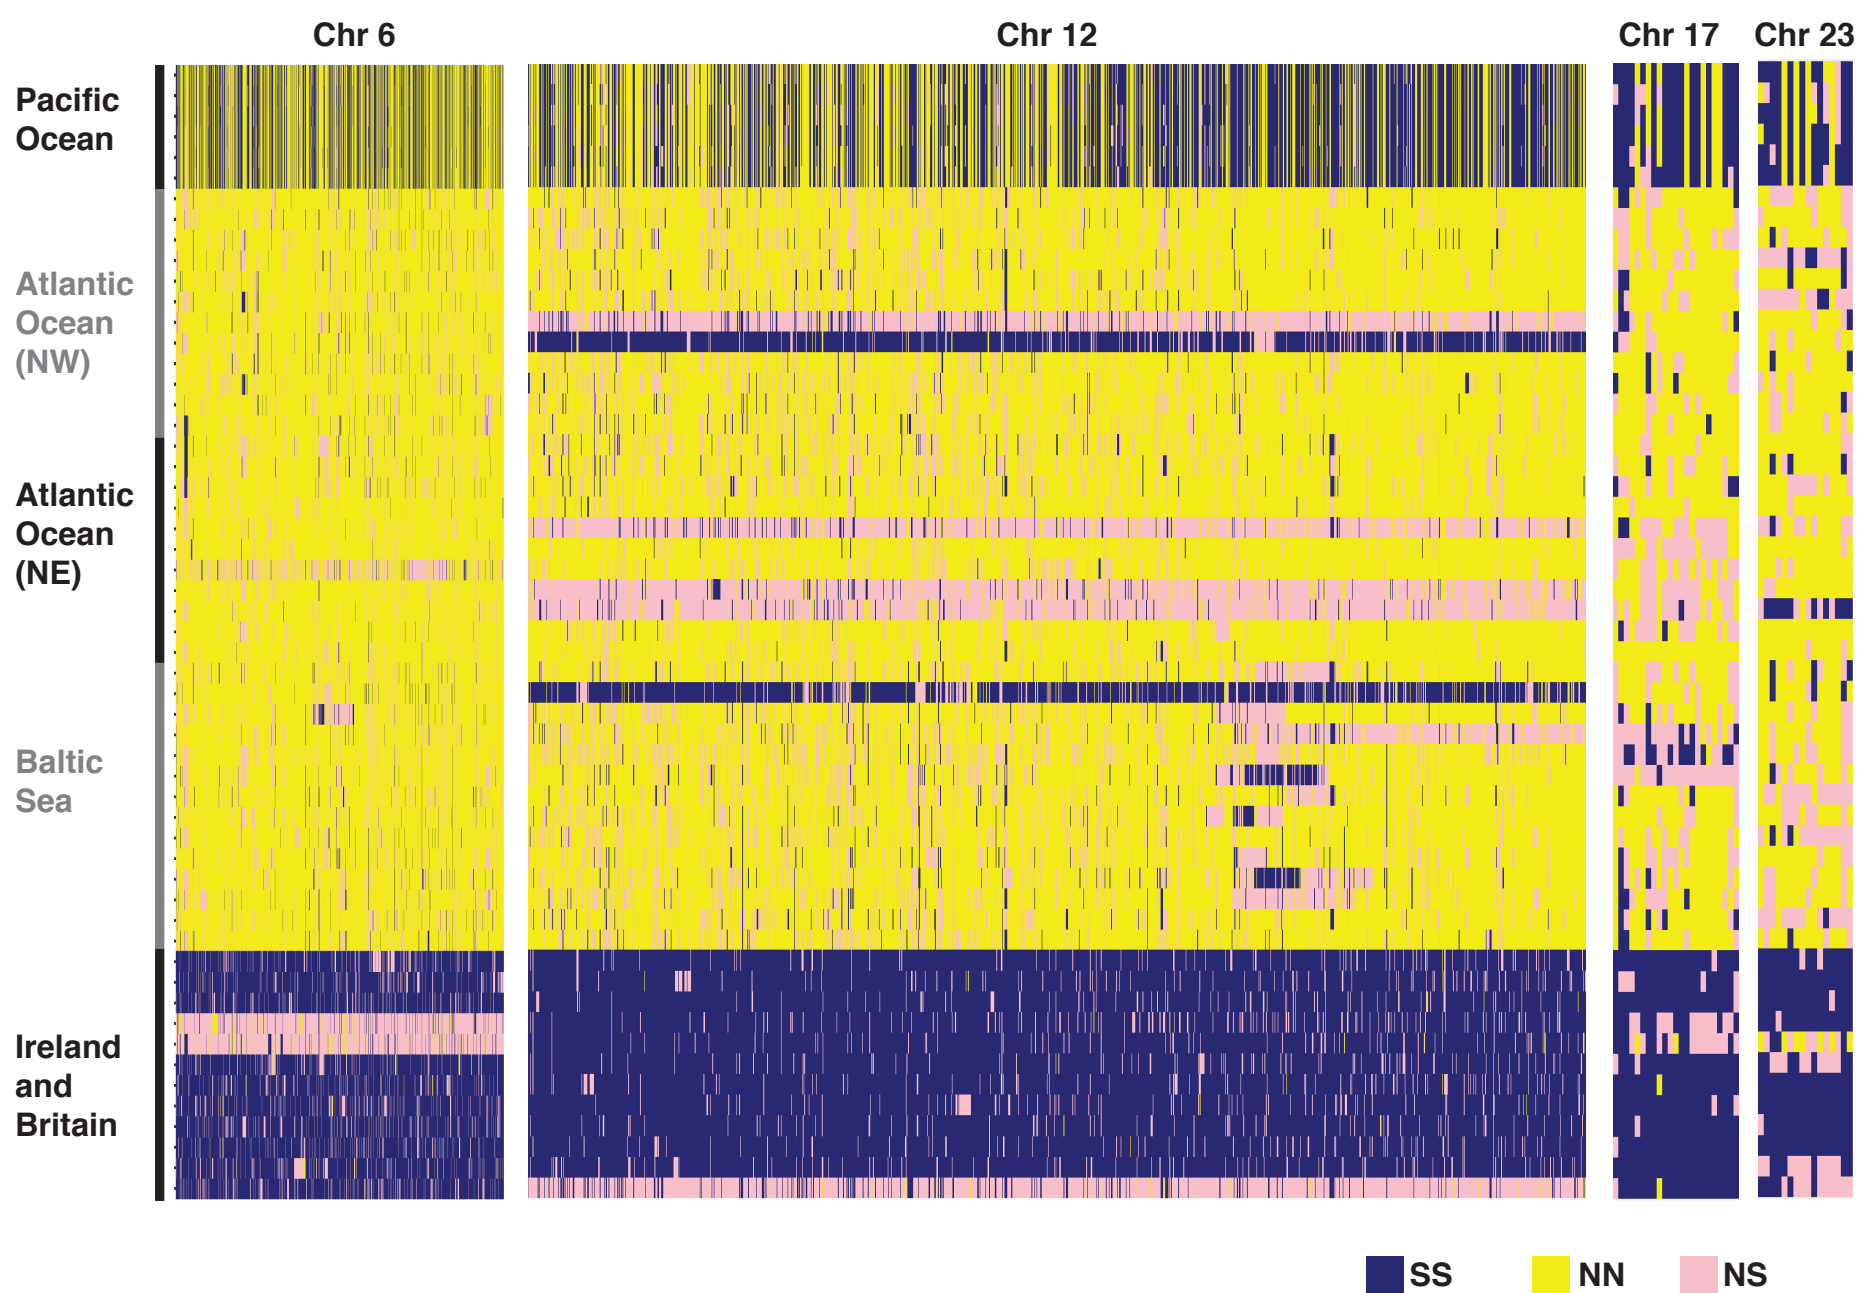

Supplement: supp [file elife-61076-supp-v1.zip]

North Sea vs North-East Atlantic

**a**

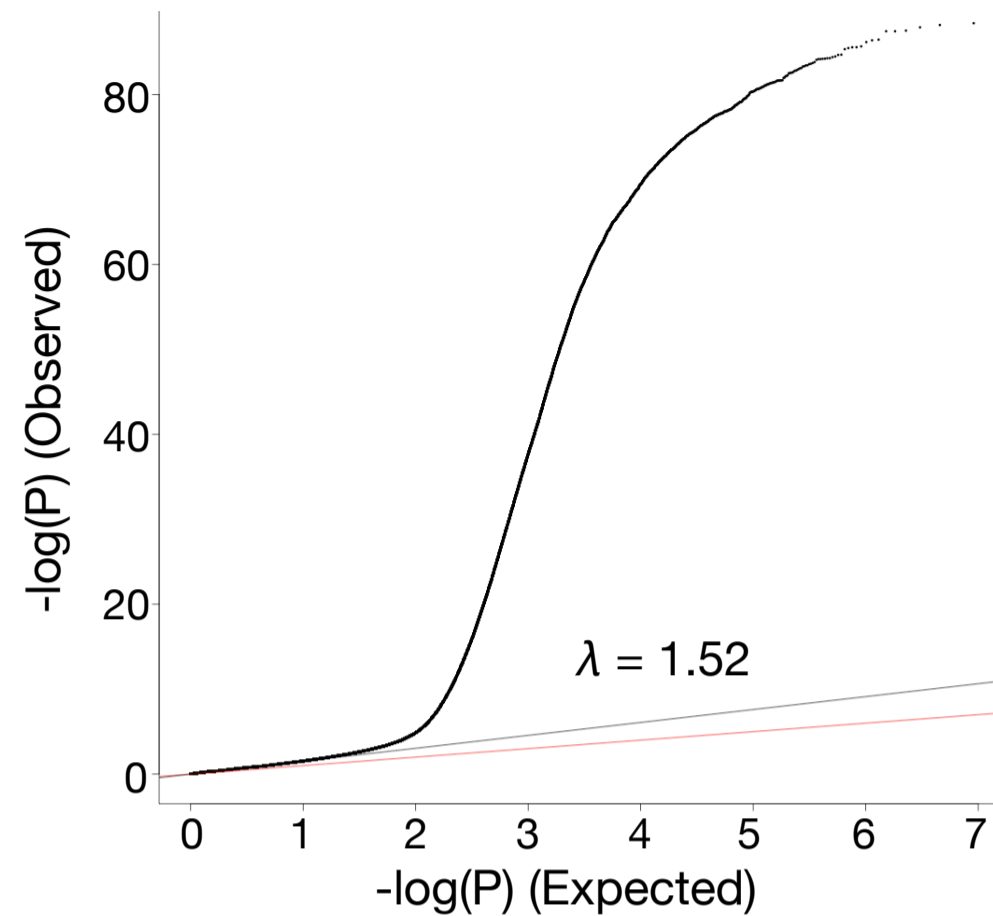

**b**

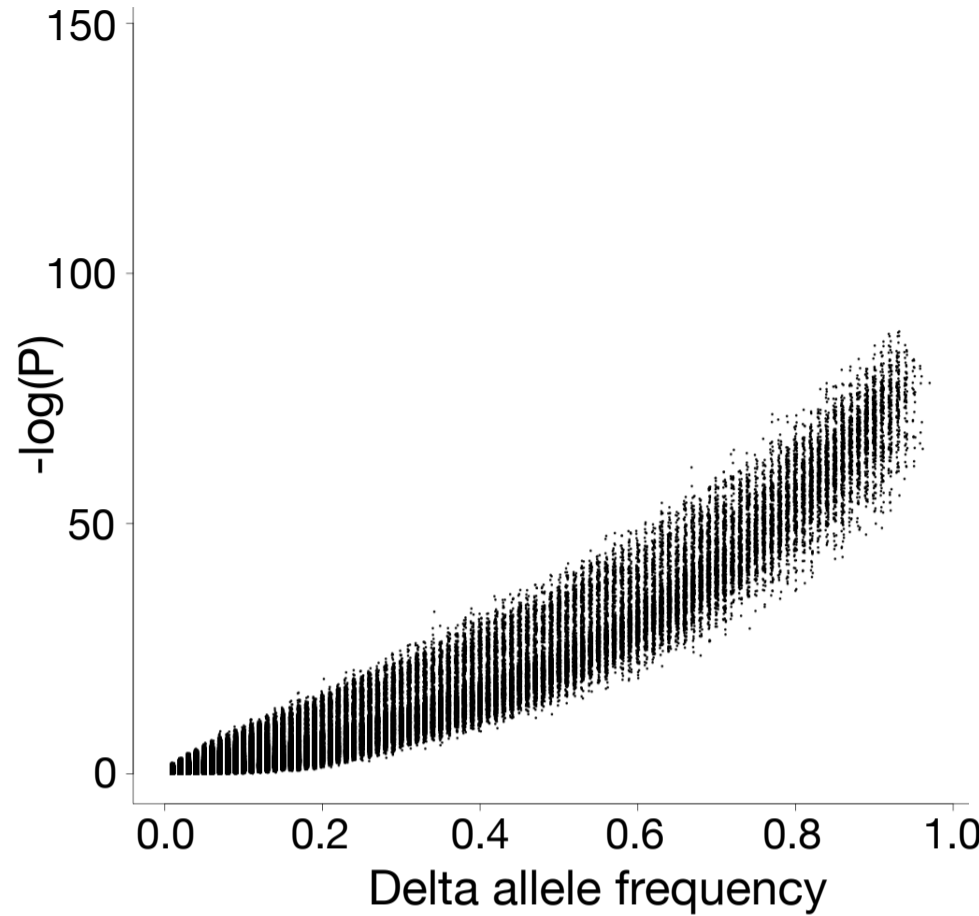

**c**

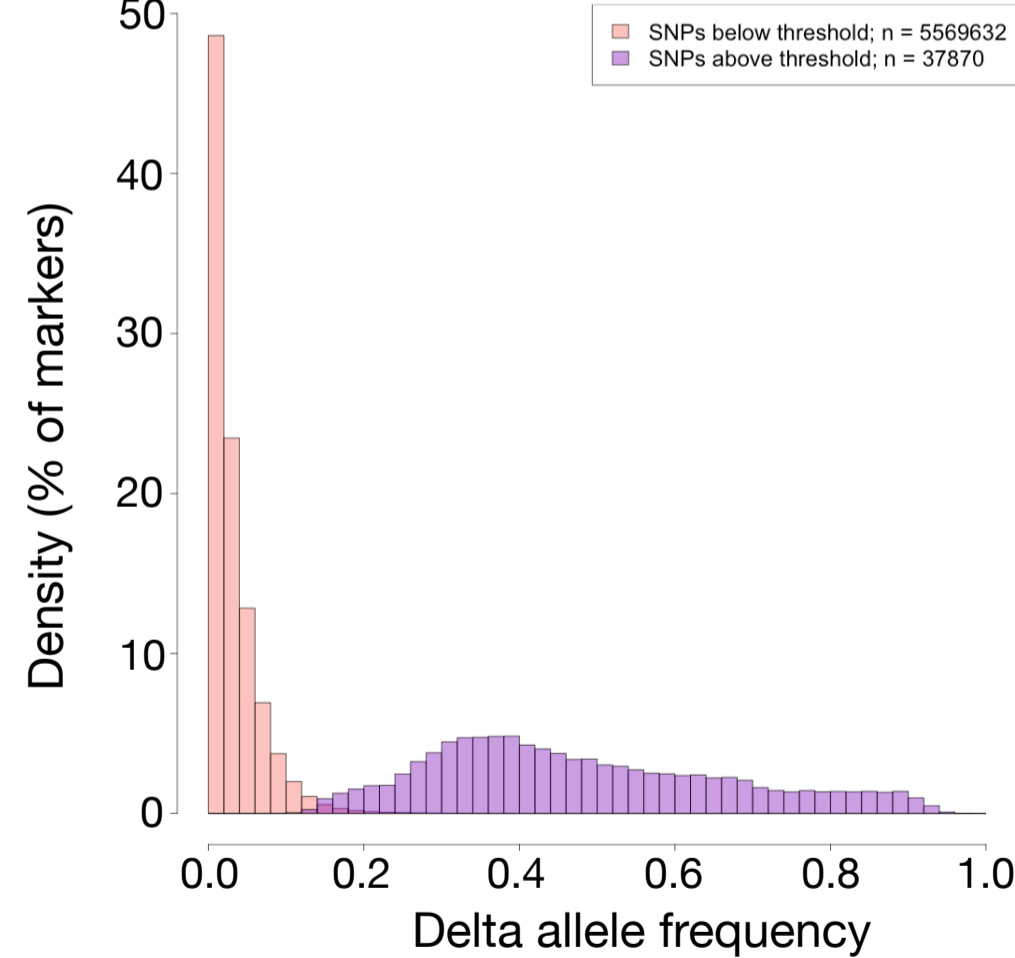

Supplement: supp [file elife-61076-supp-v1.zip]

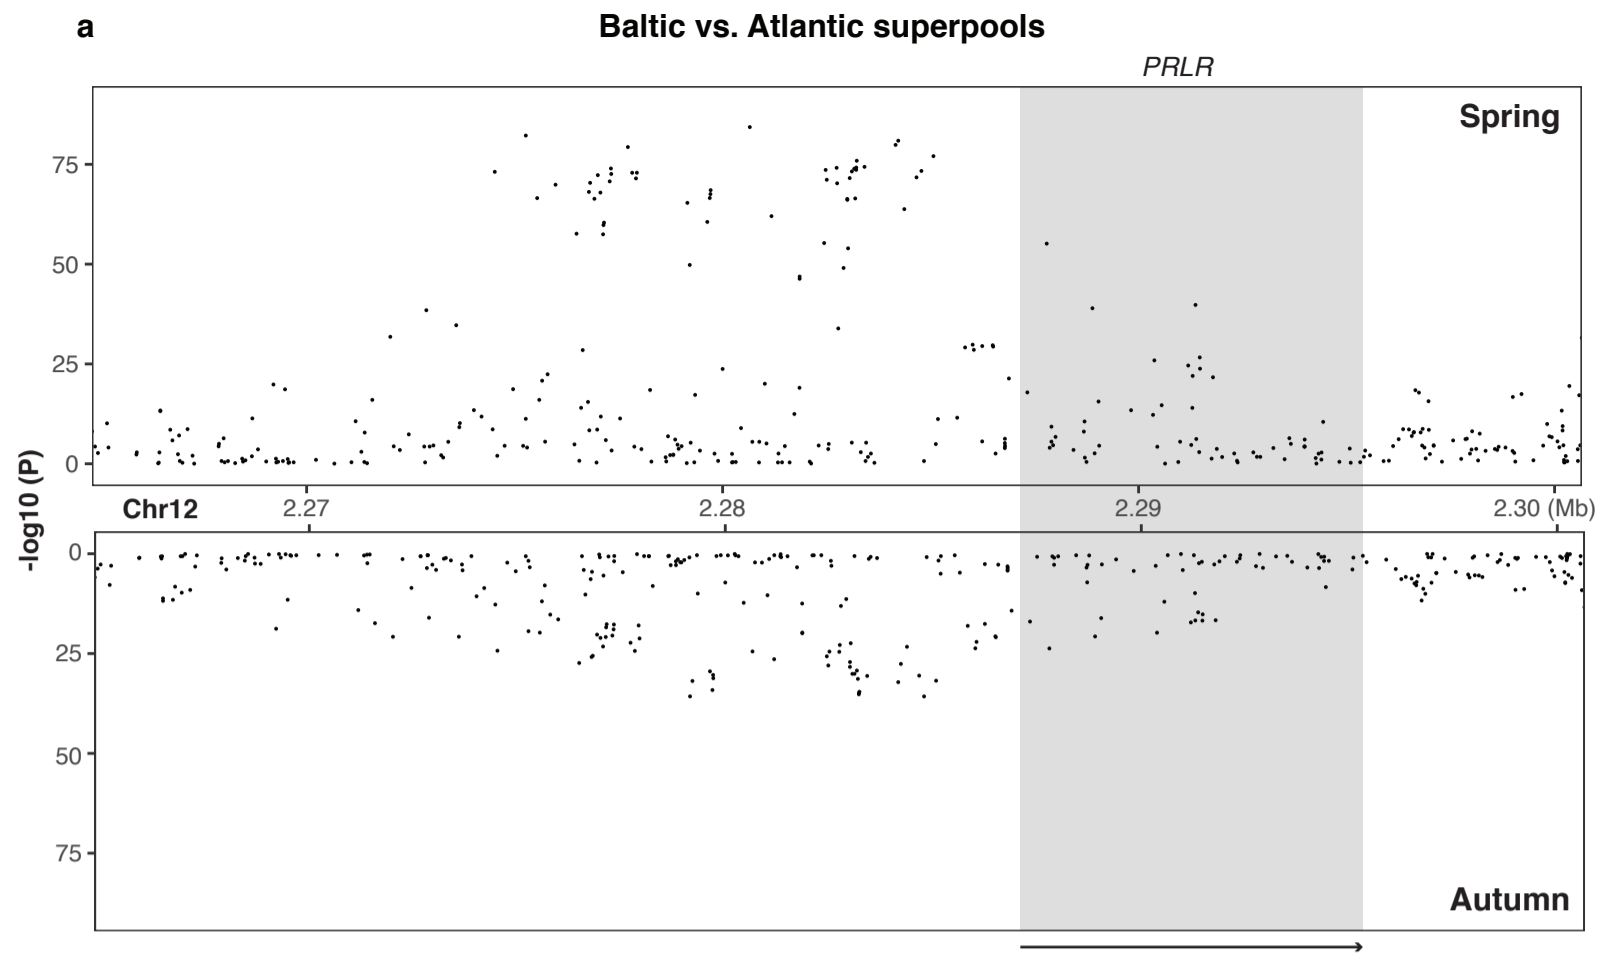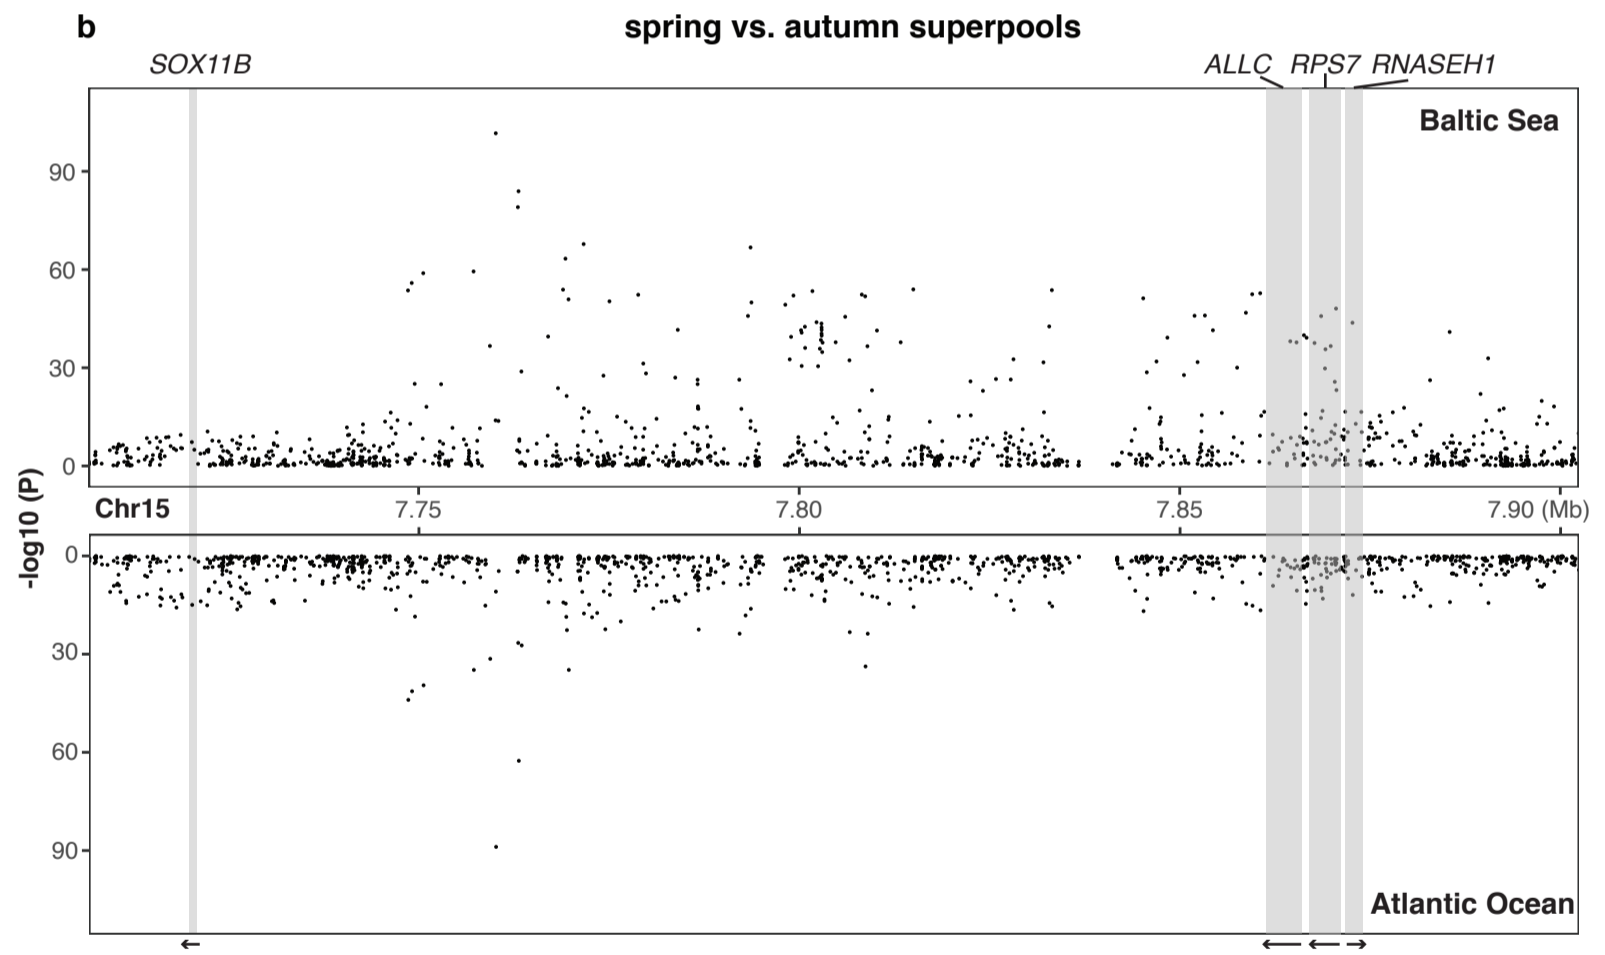

Supplement: supp [file elife-61076-supp-v1.zip]

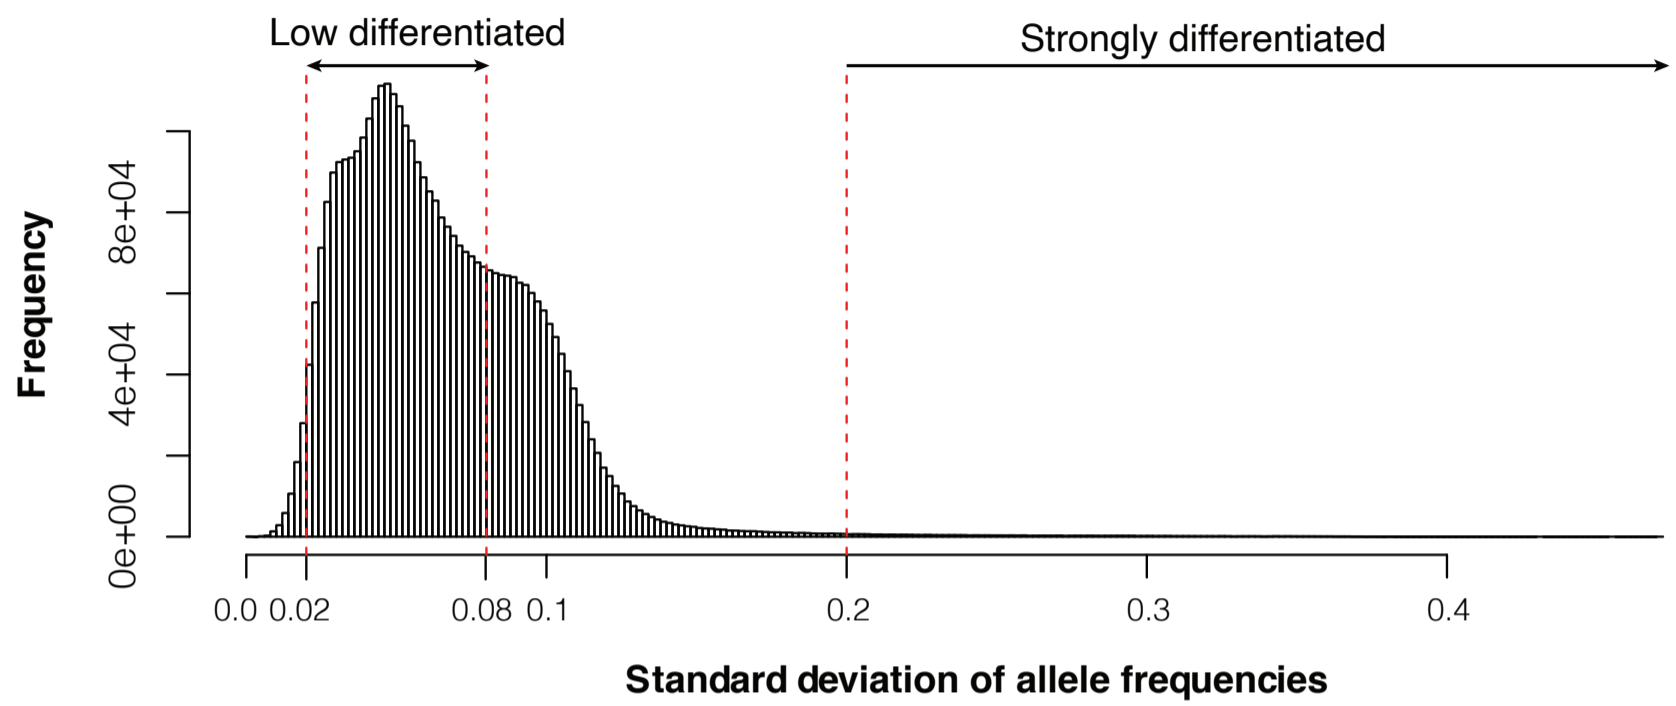

Supplement: supp [file elife-61076-supp-v1.zip]

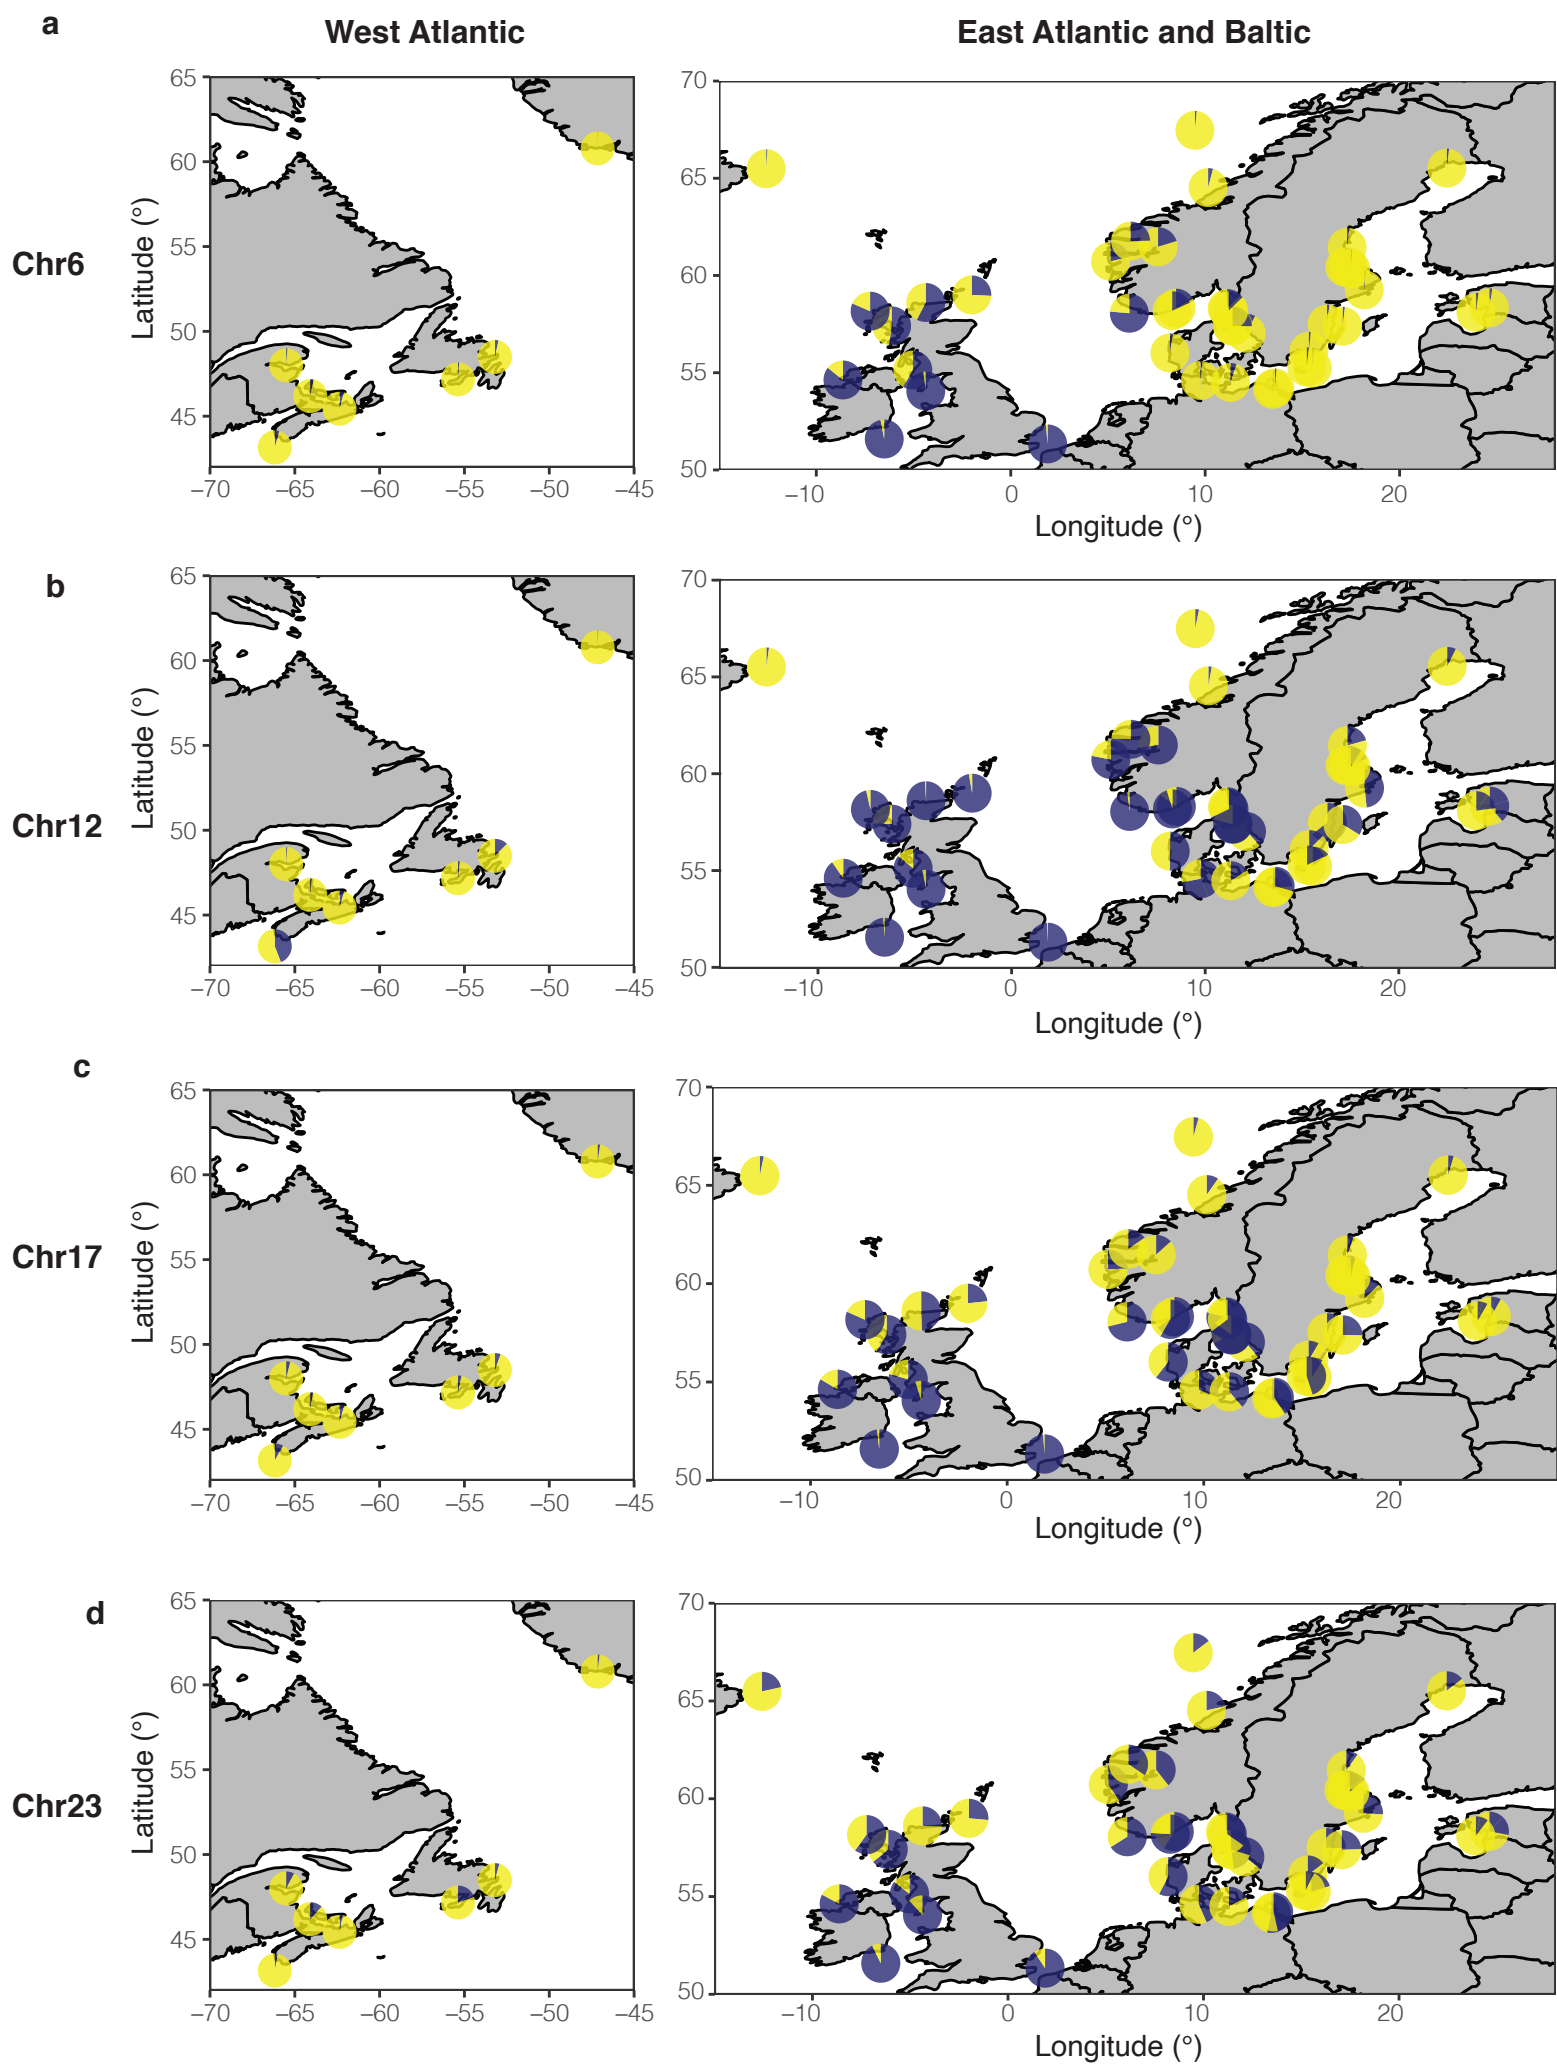

Supplement: supp [file elife-61076-supp-v1.zip]

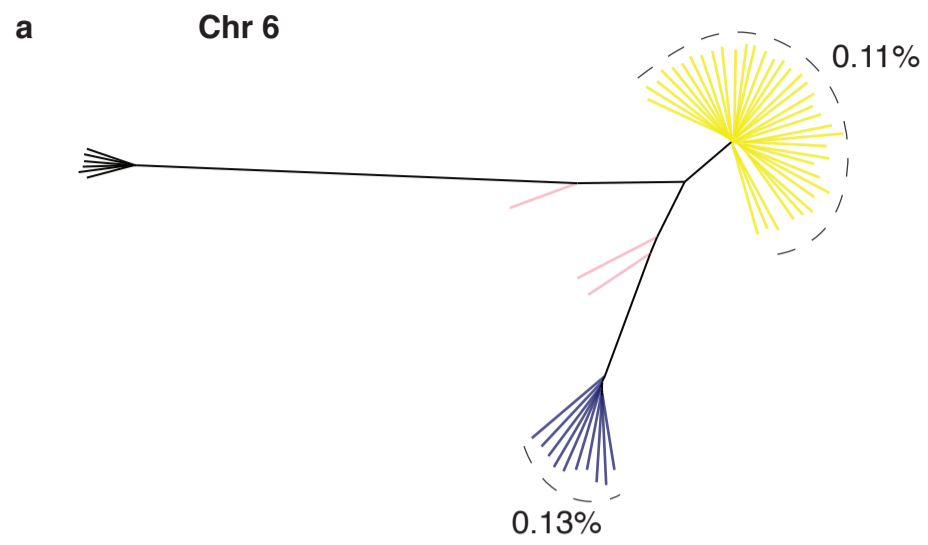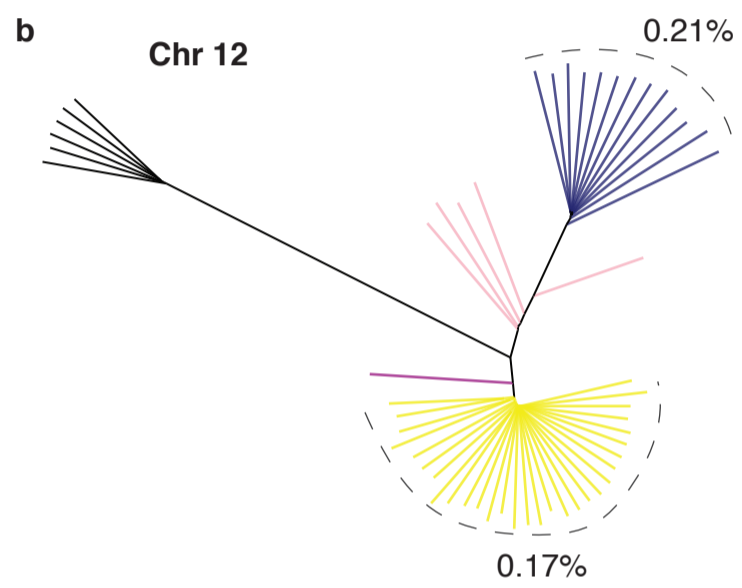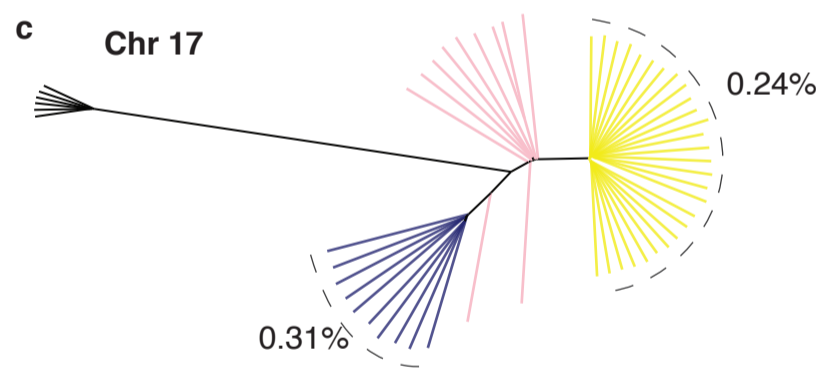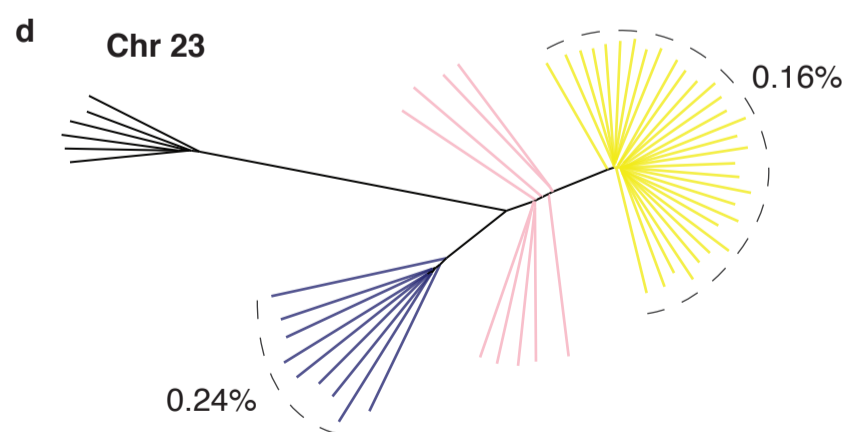

Supplement: supp [file elife-61076-supp-v1.zip]

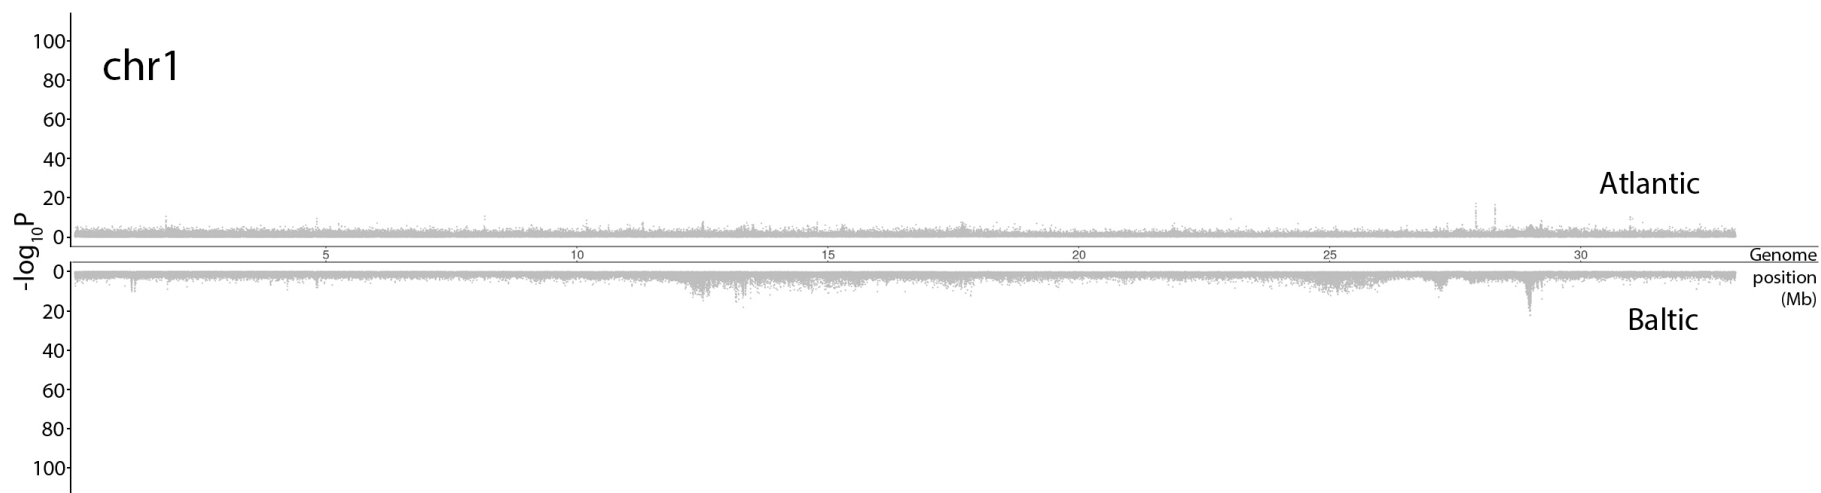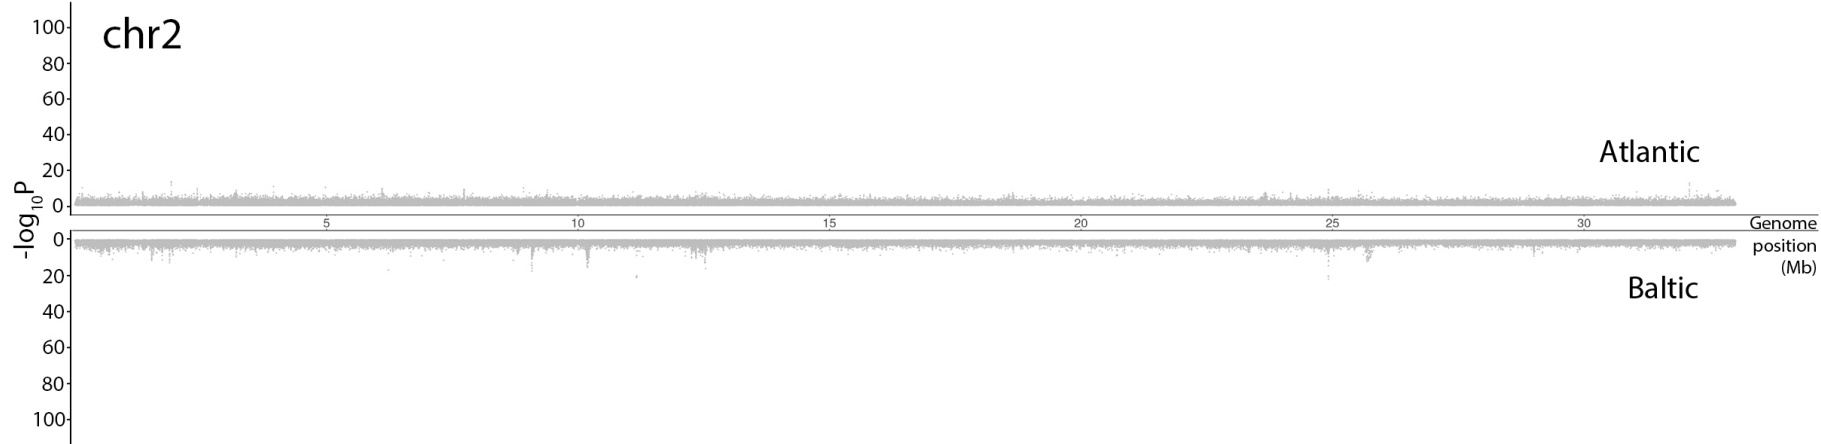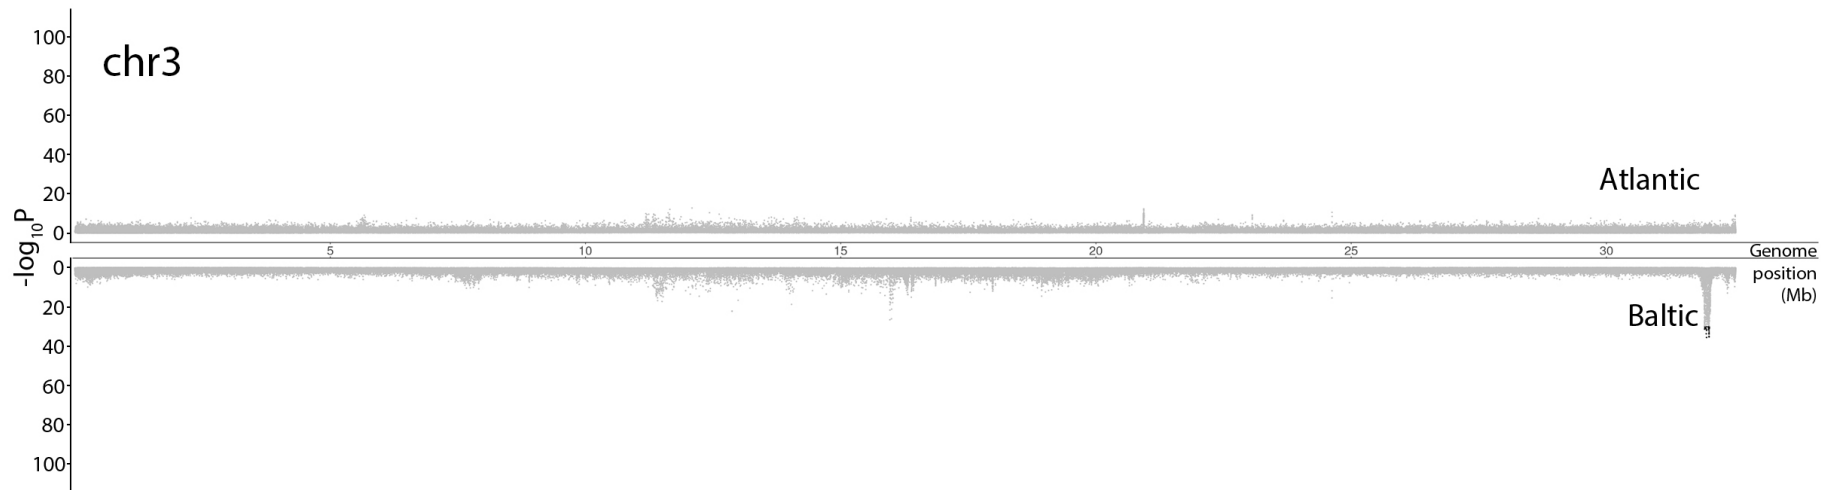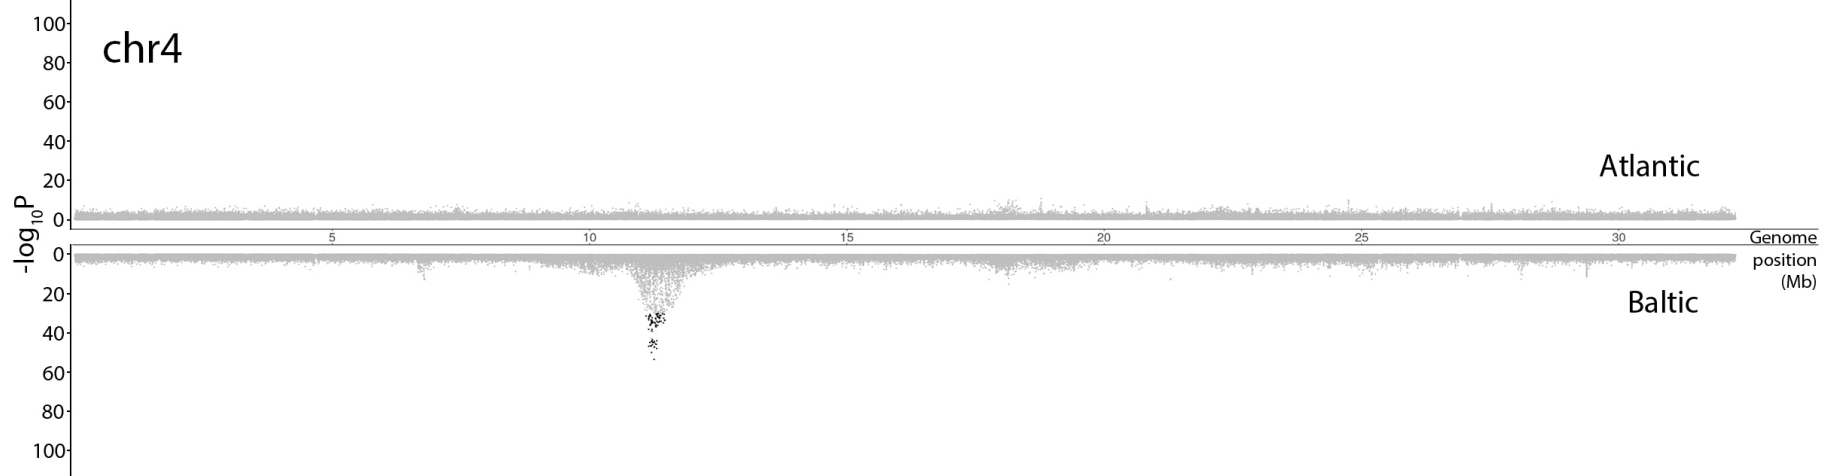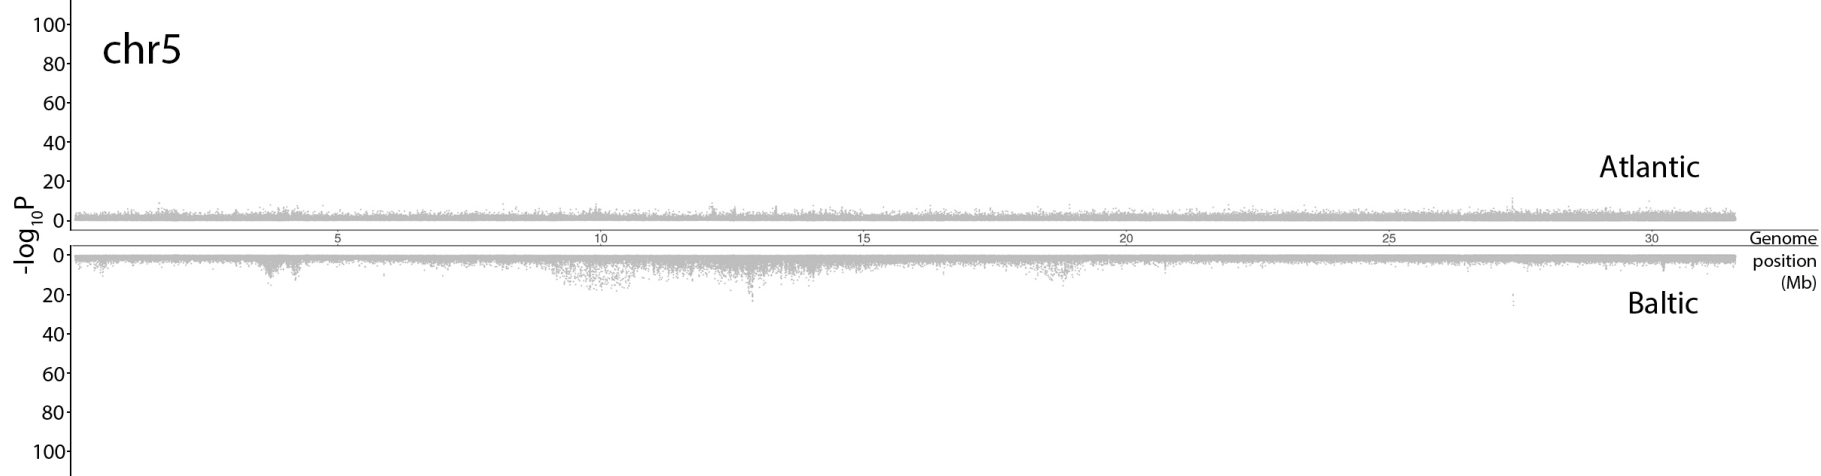

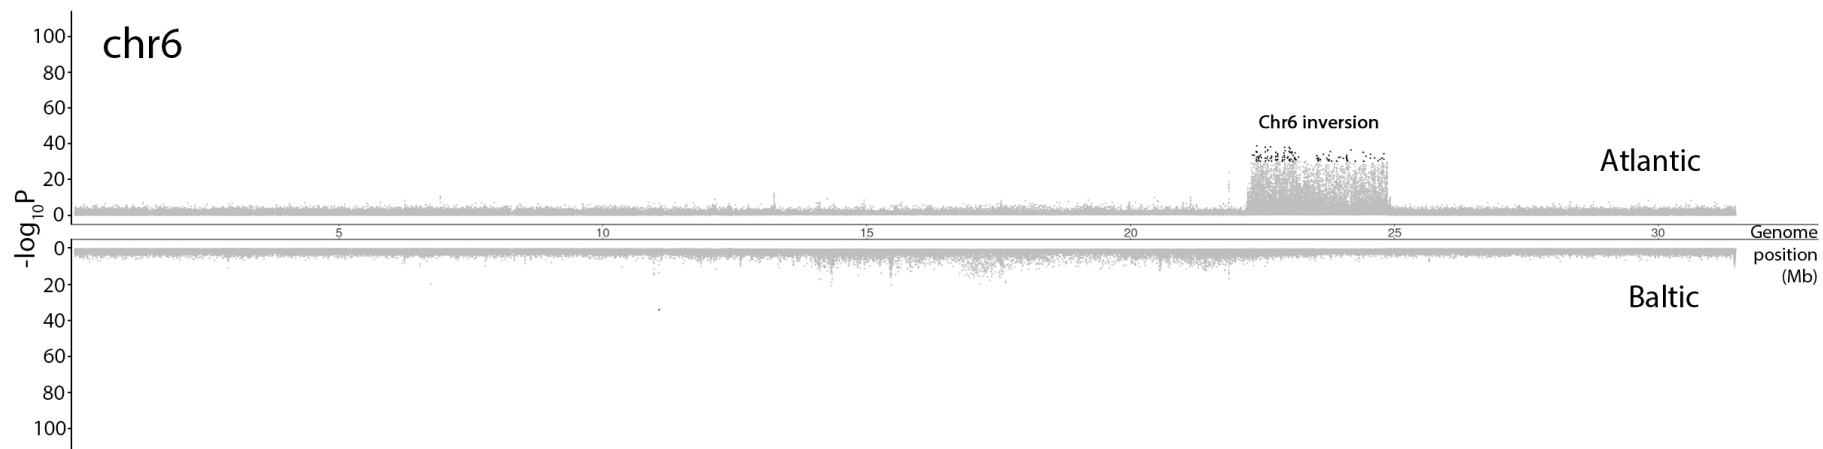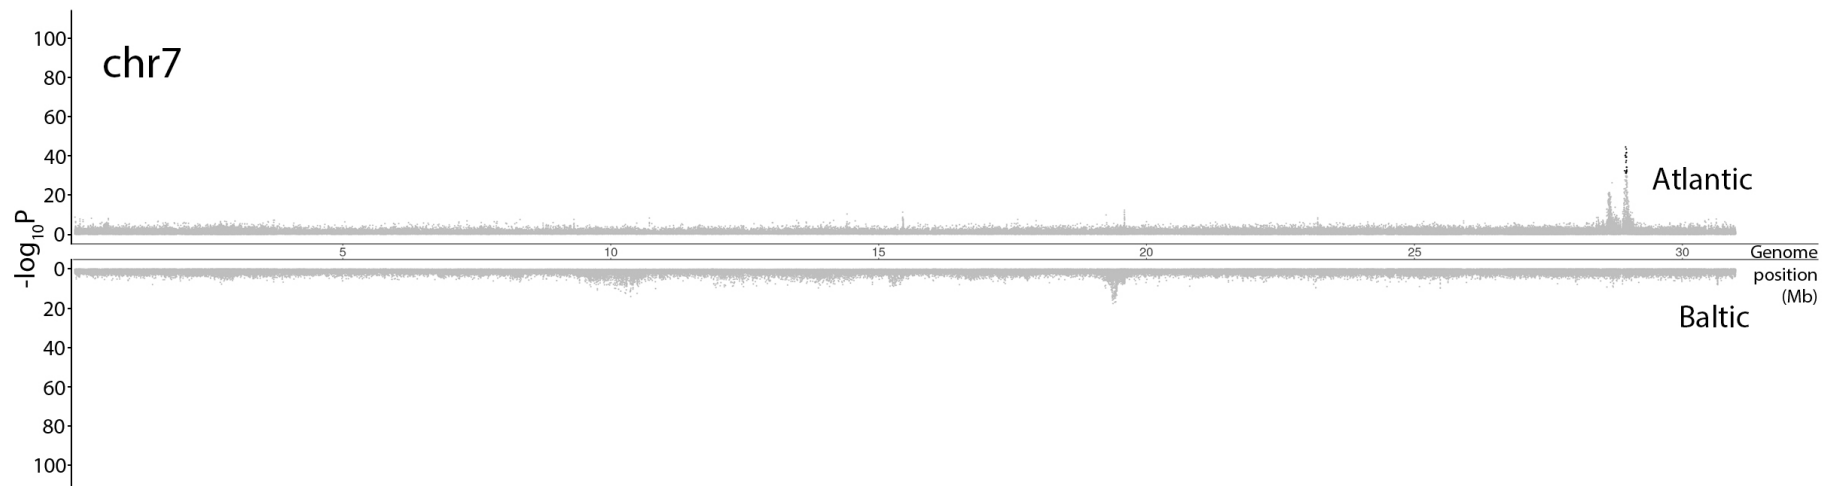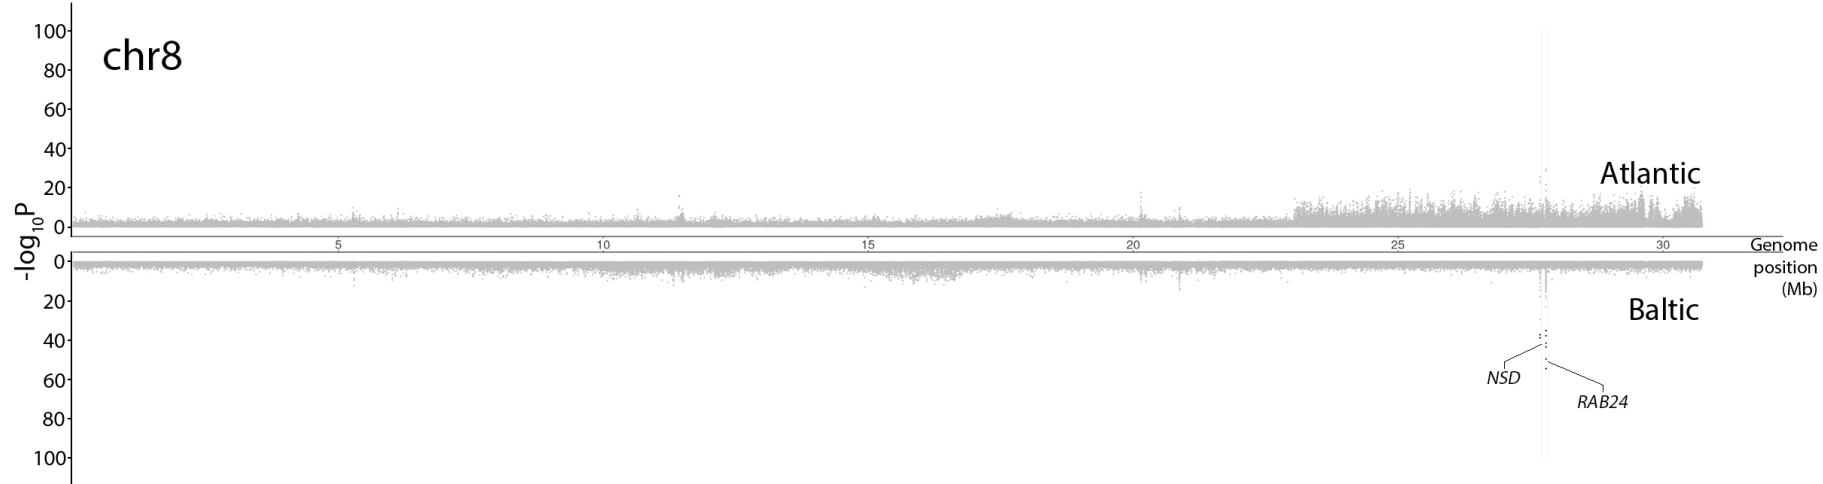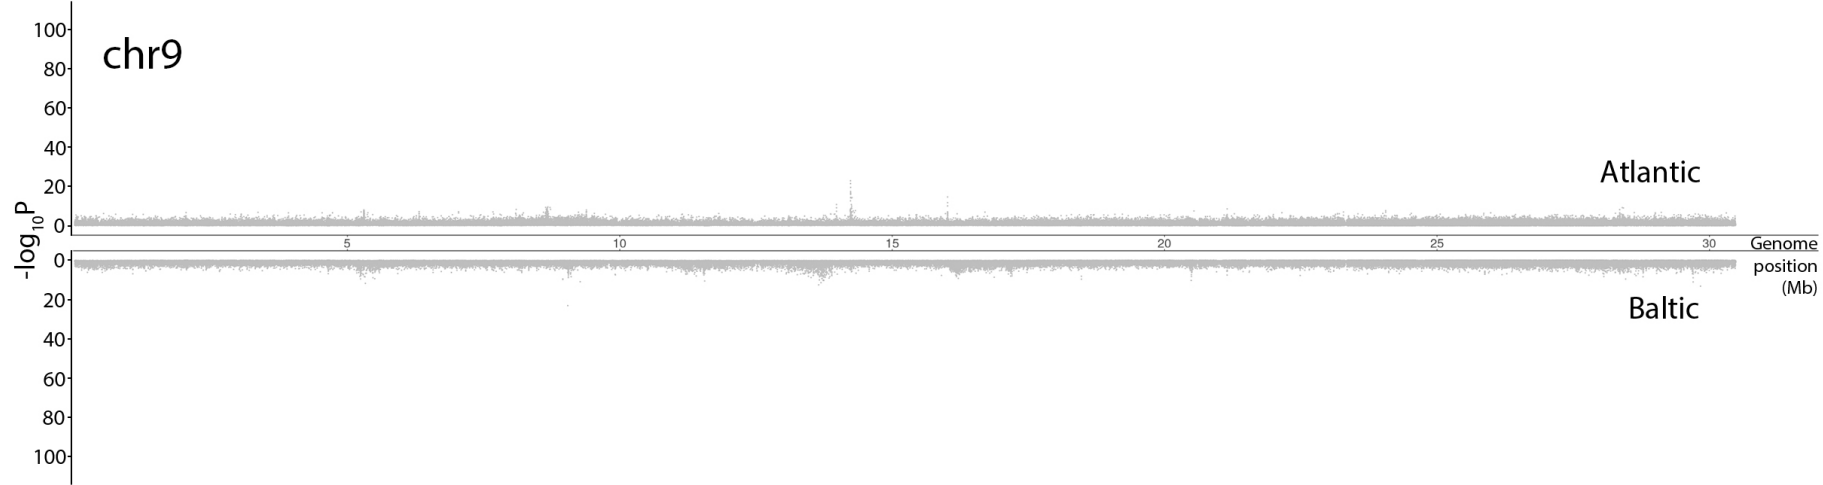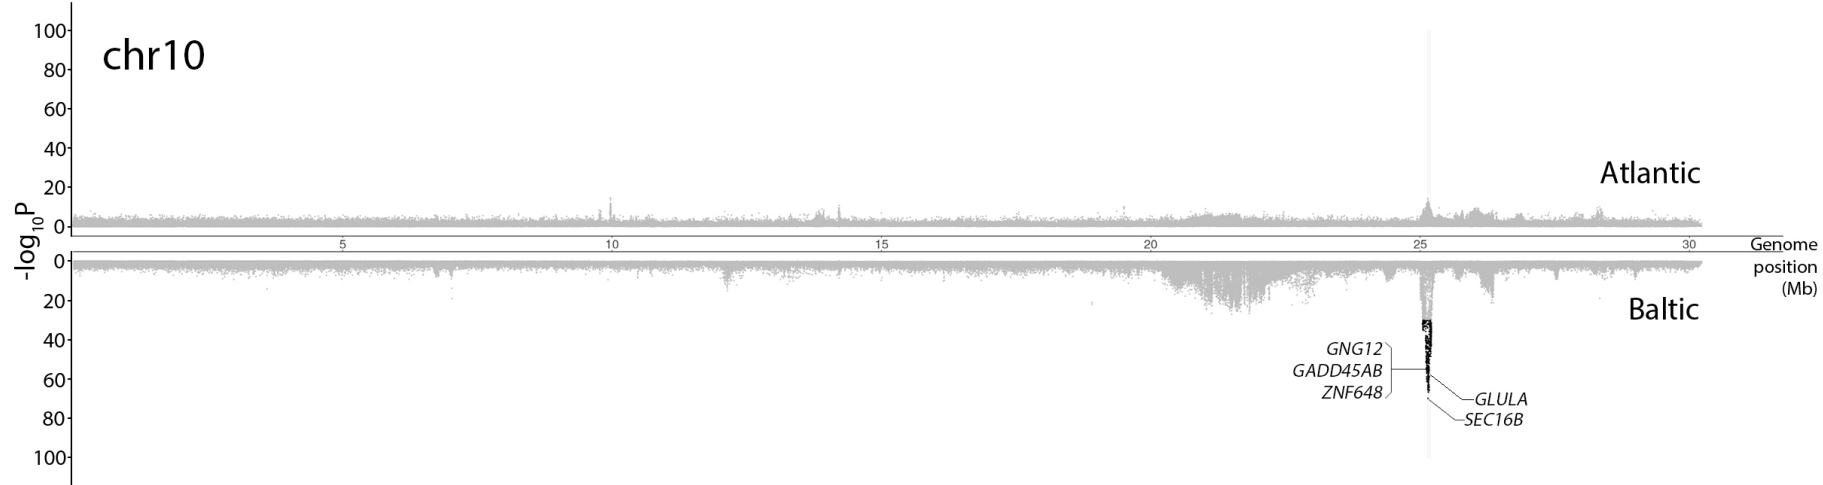

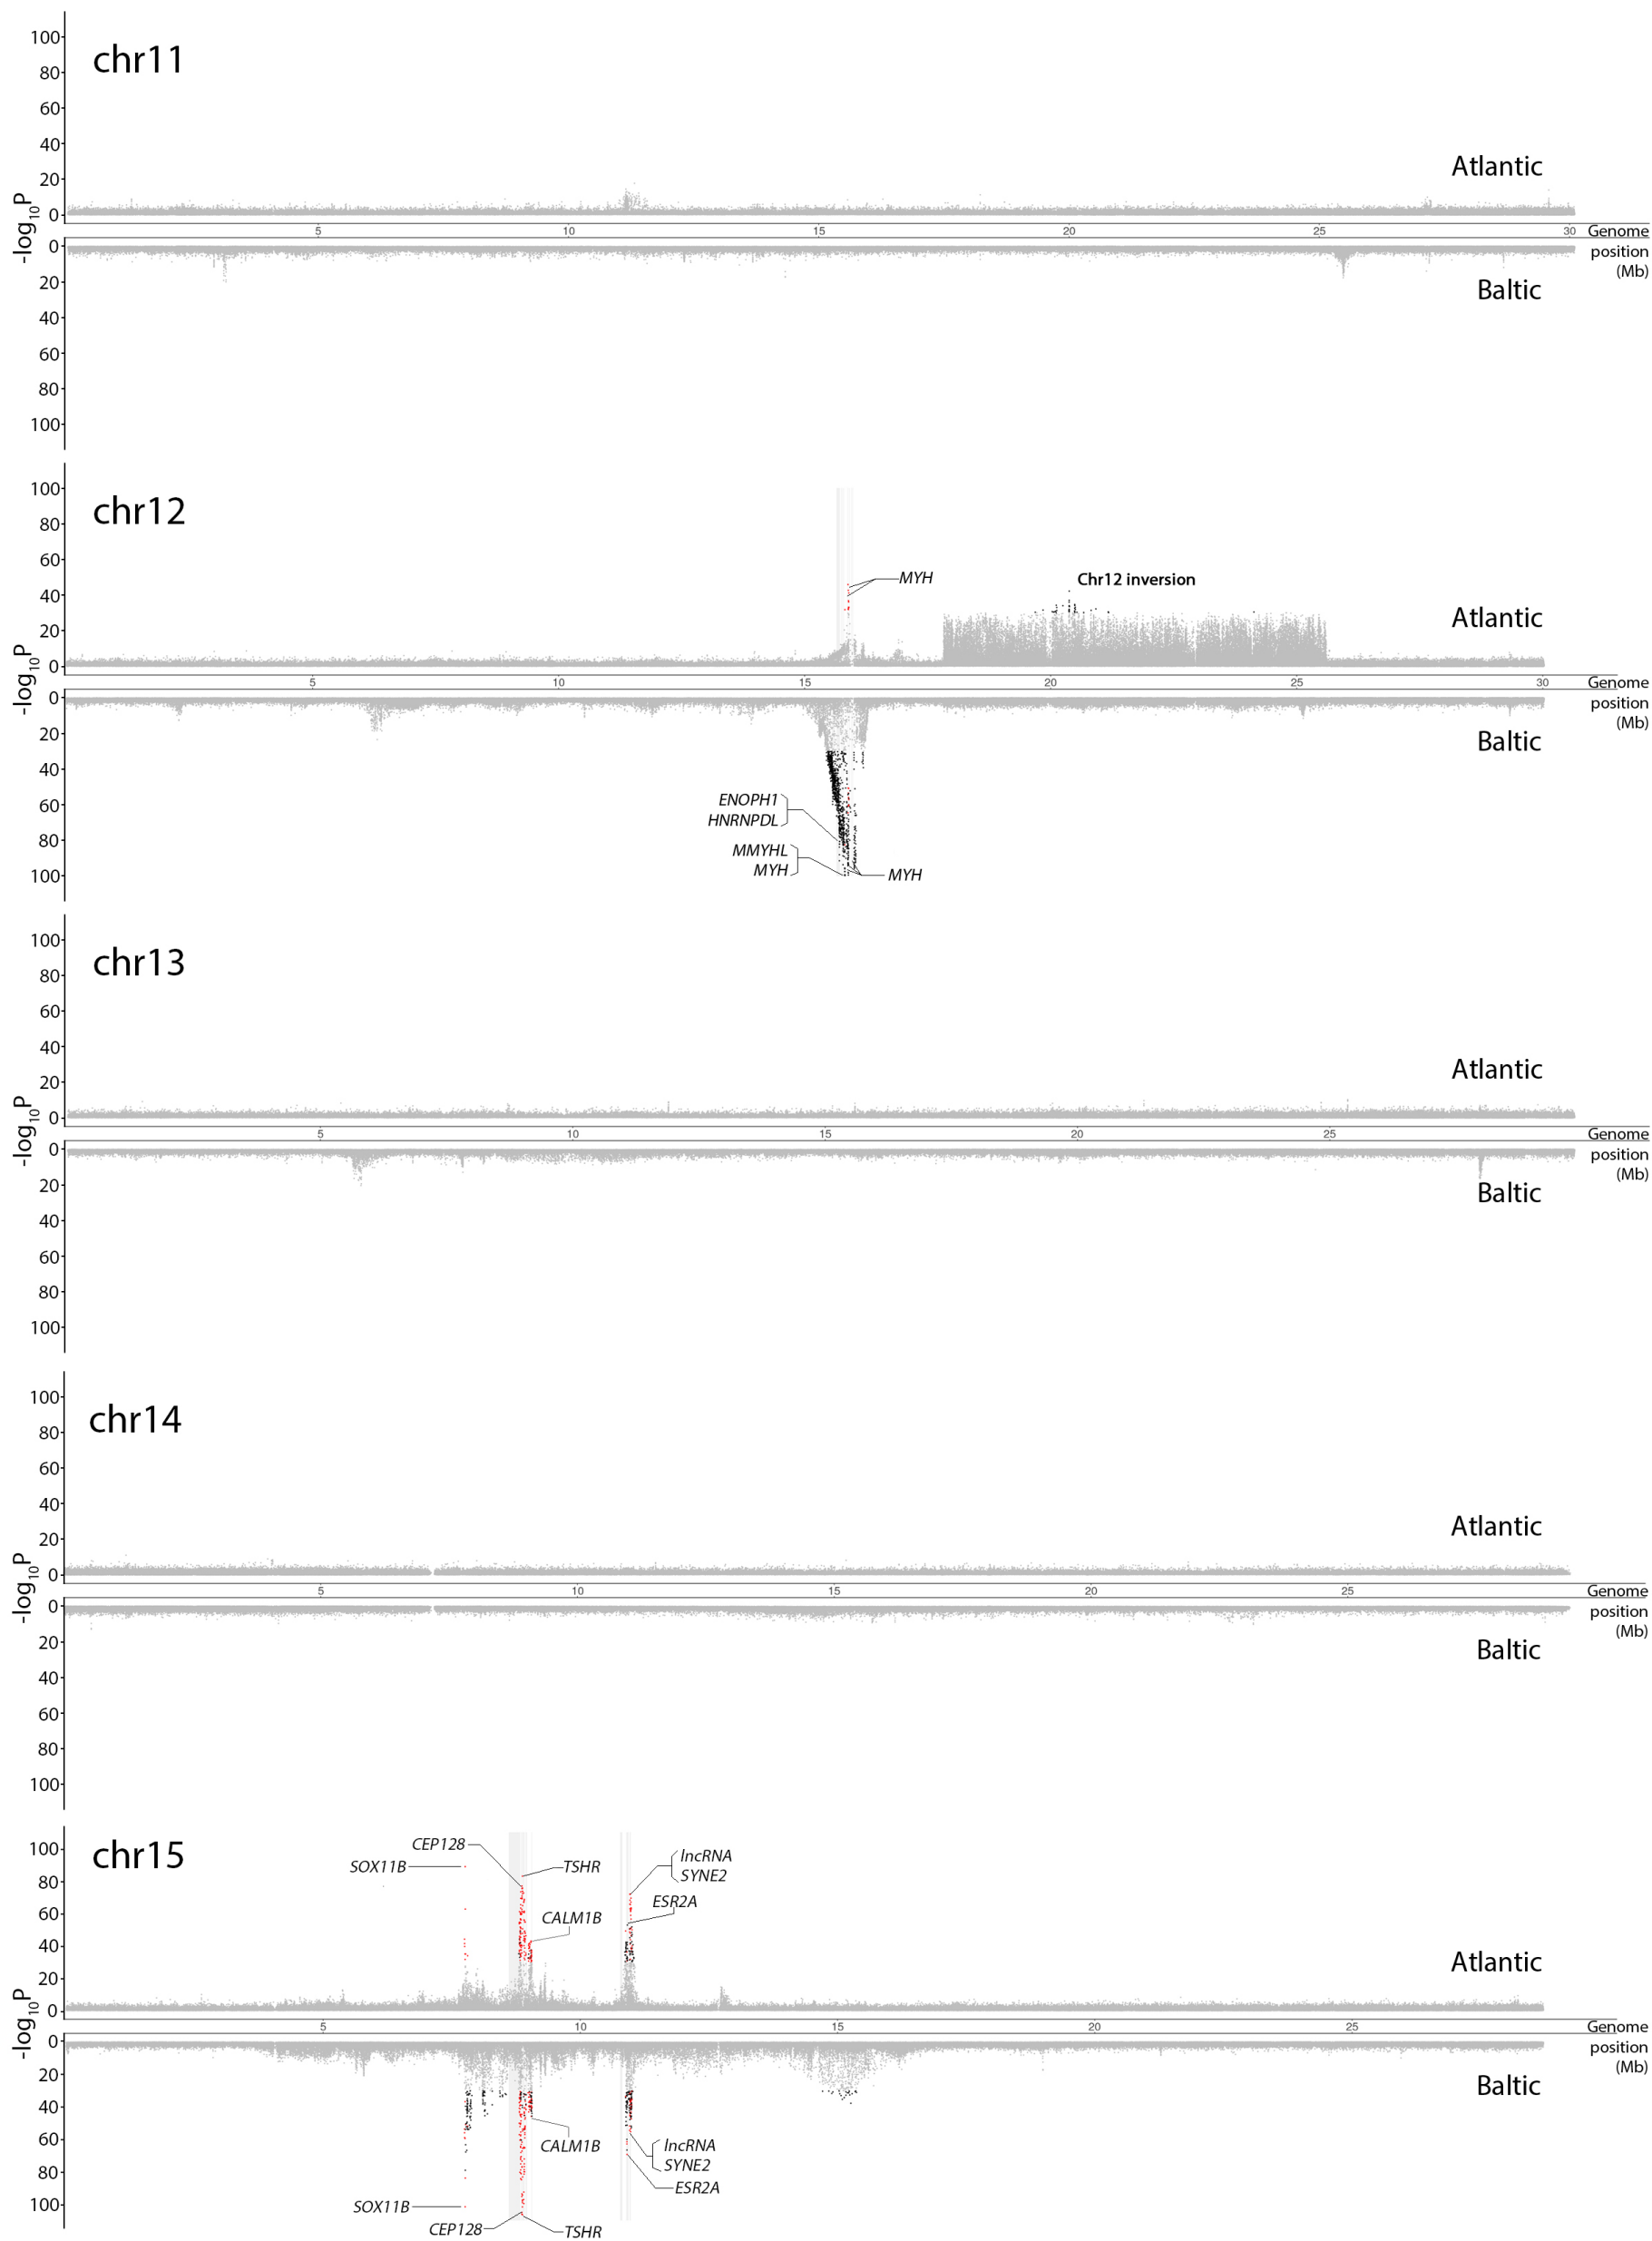

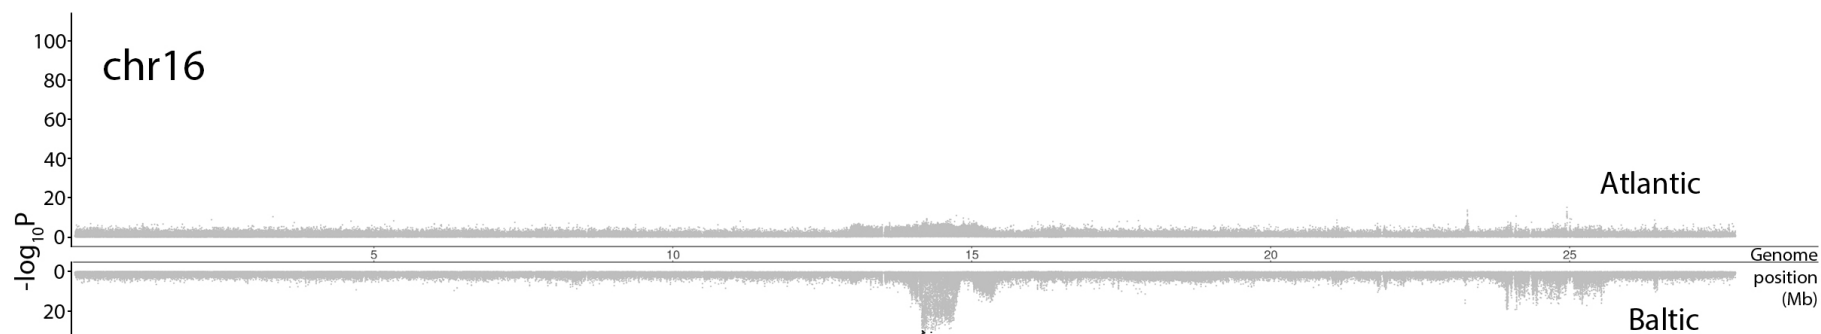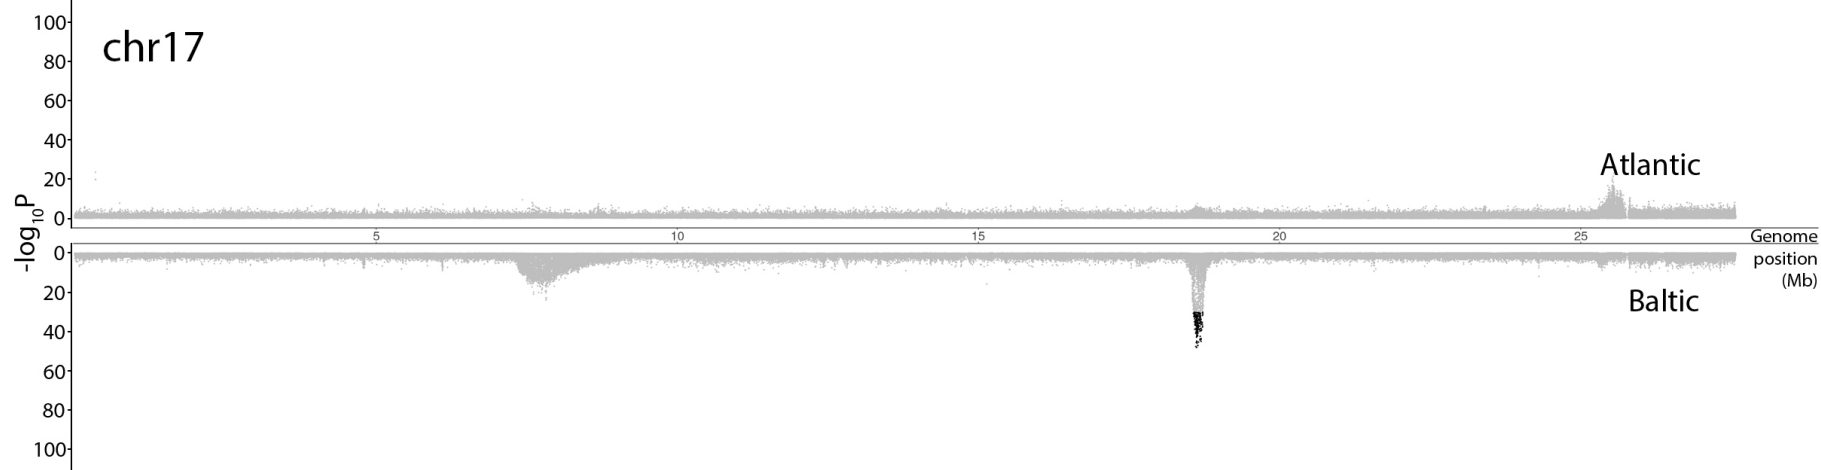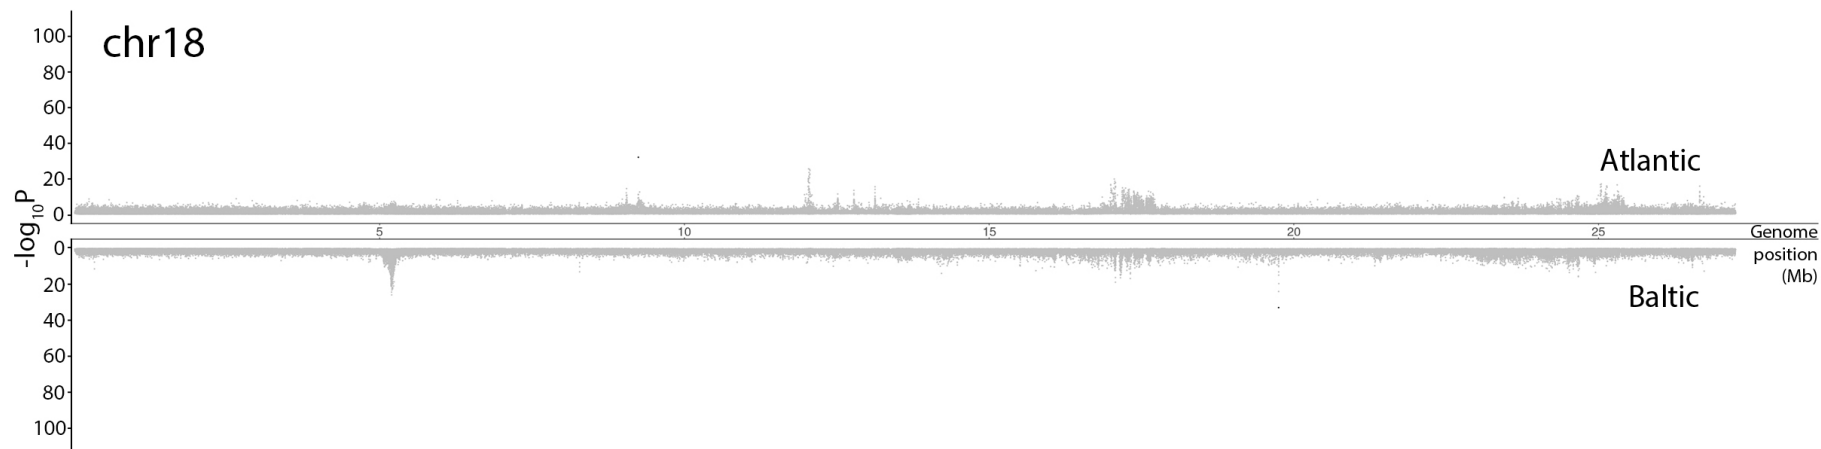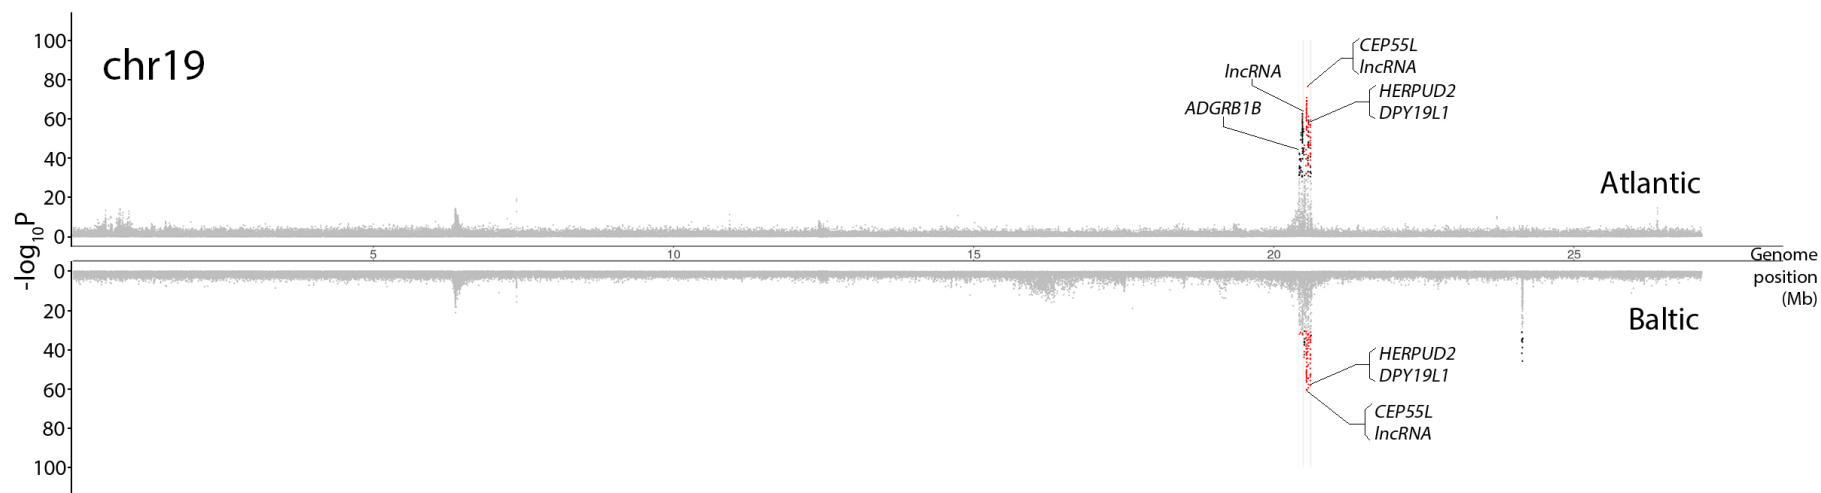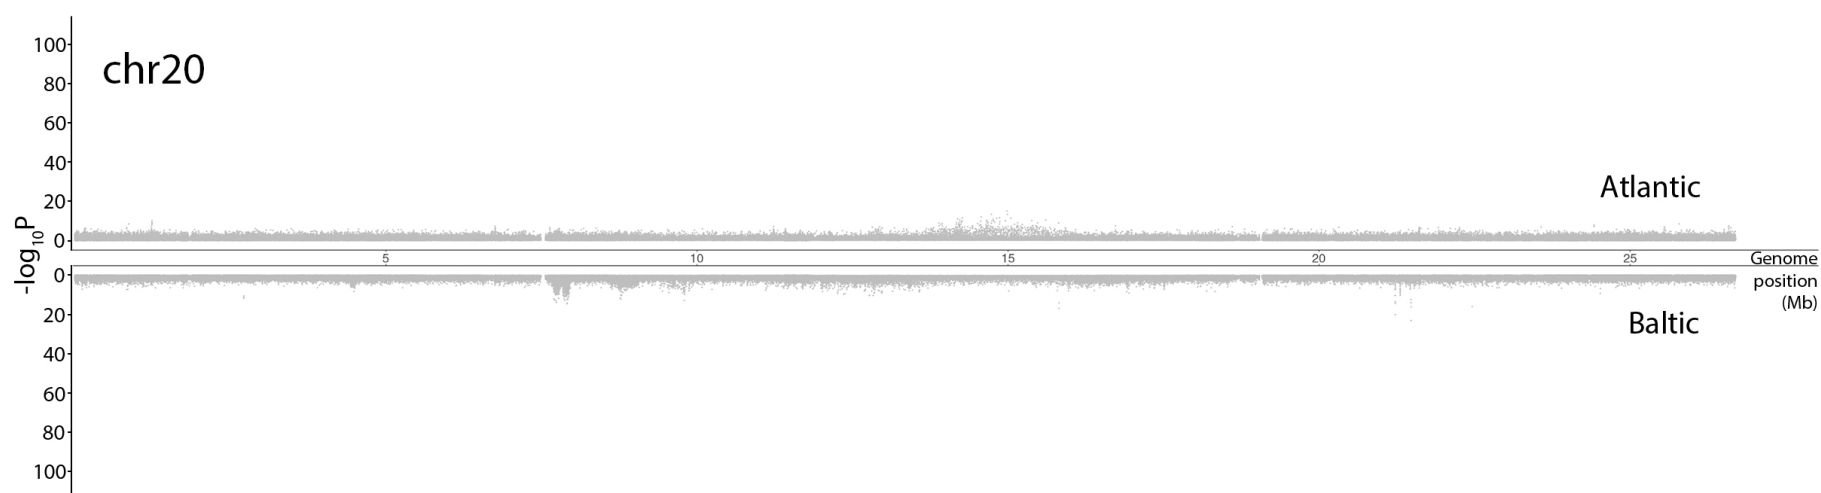

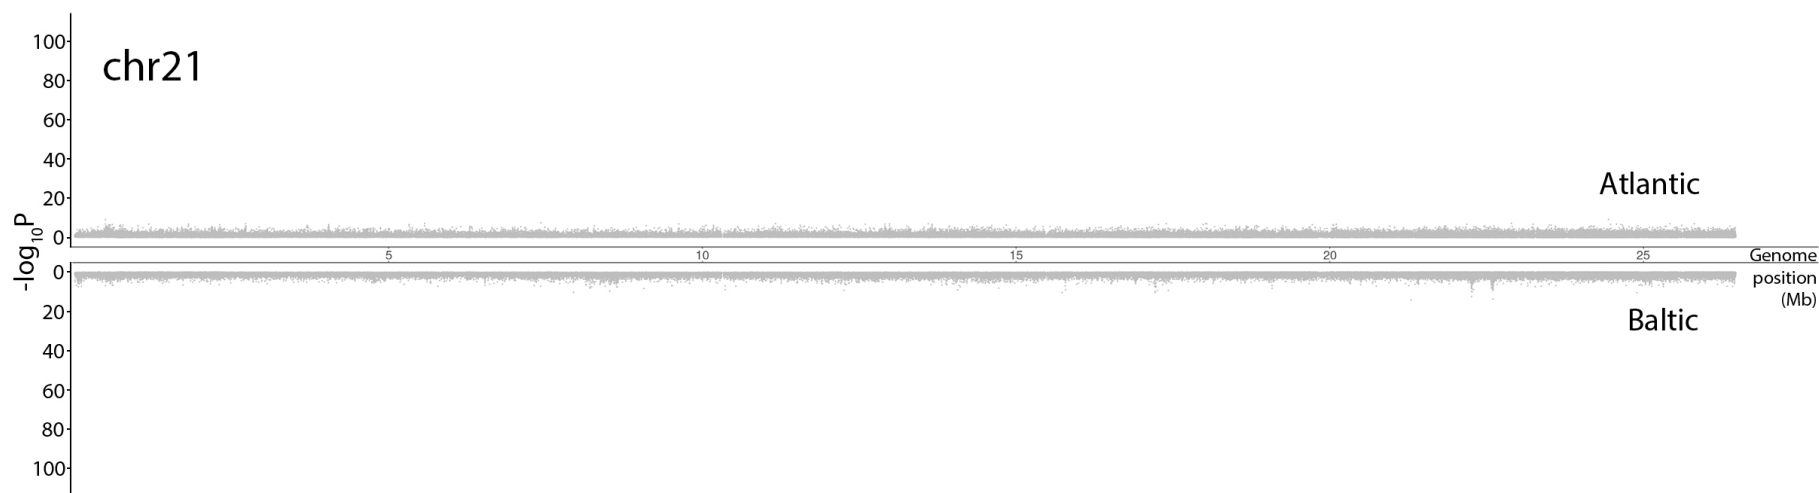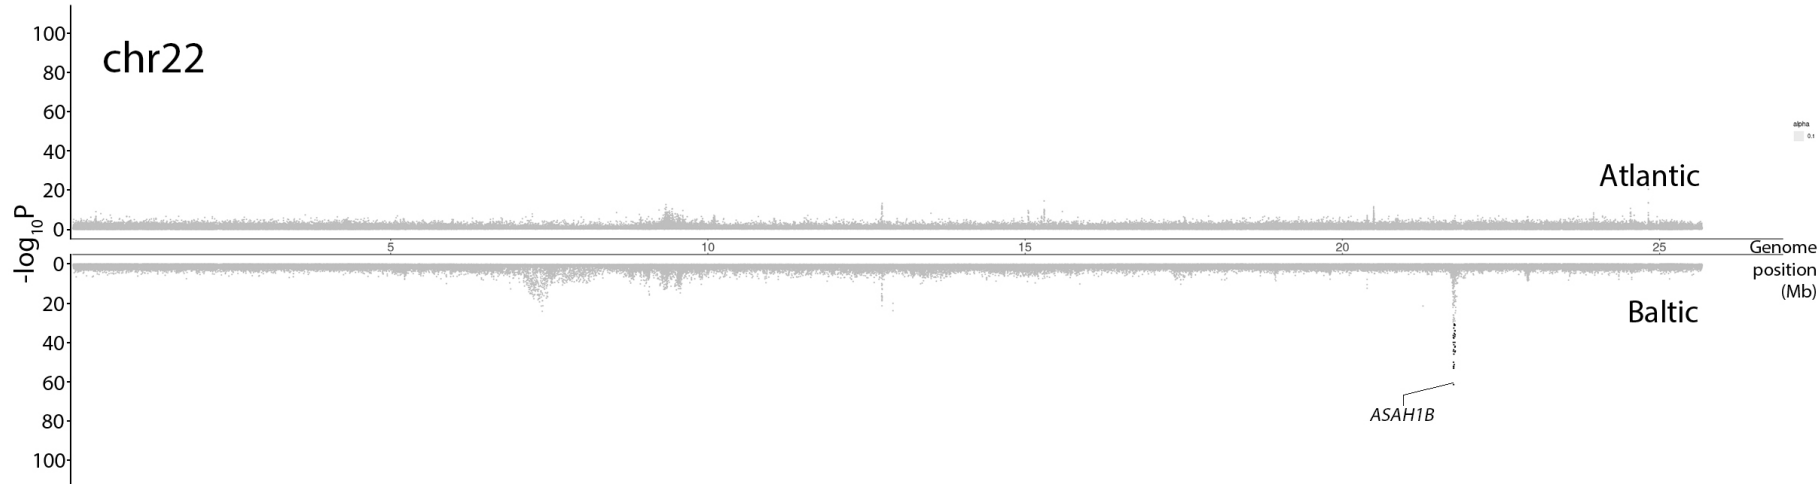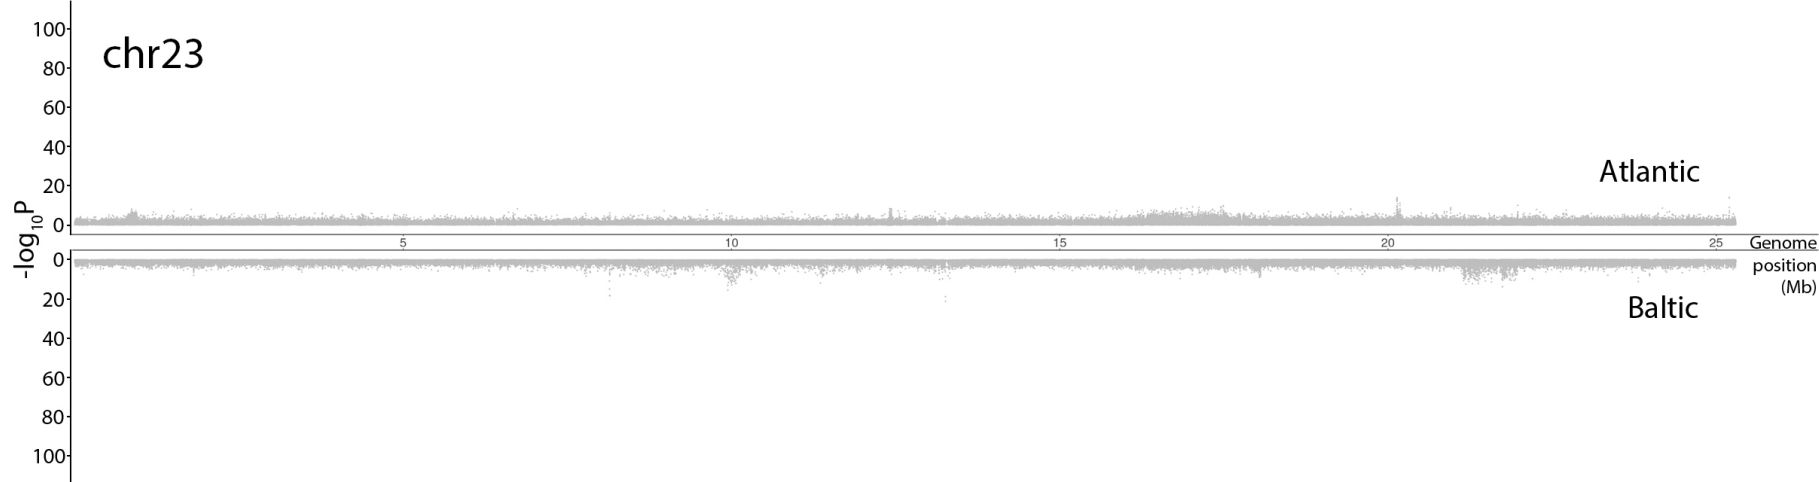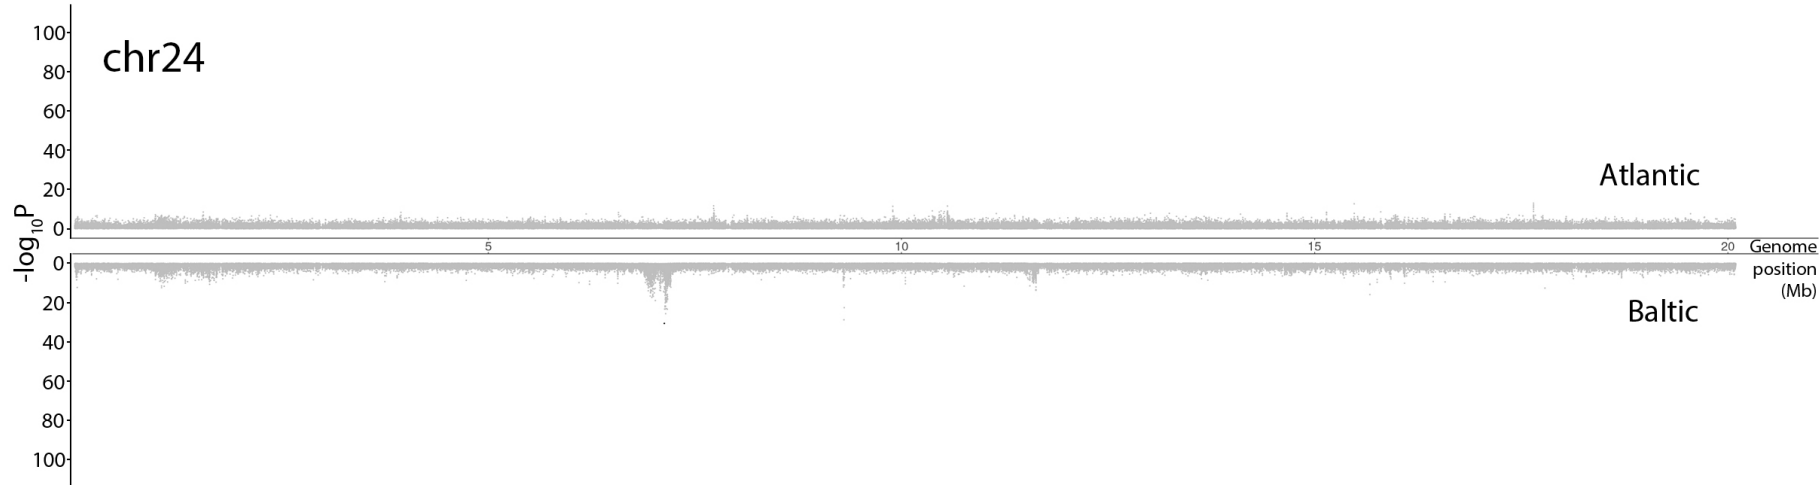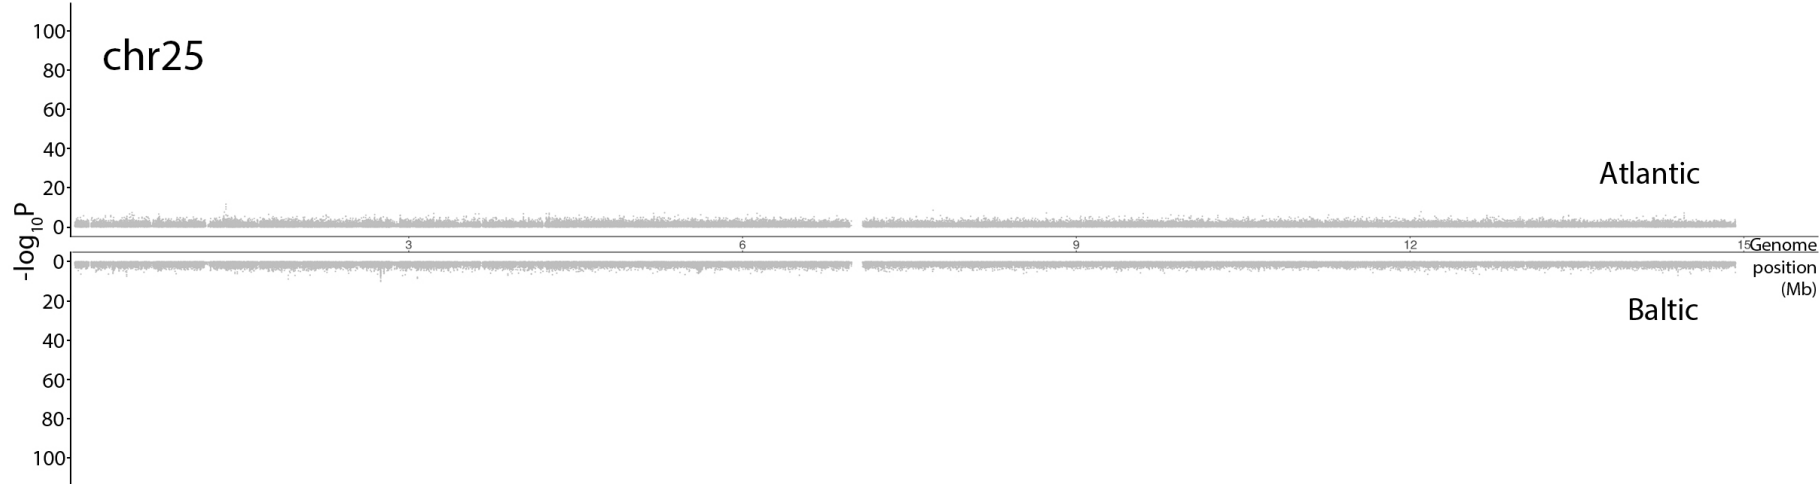

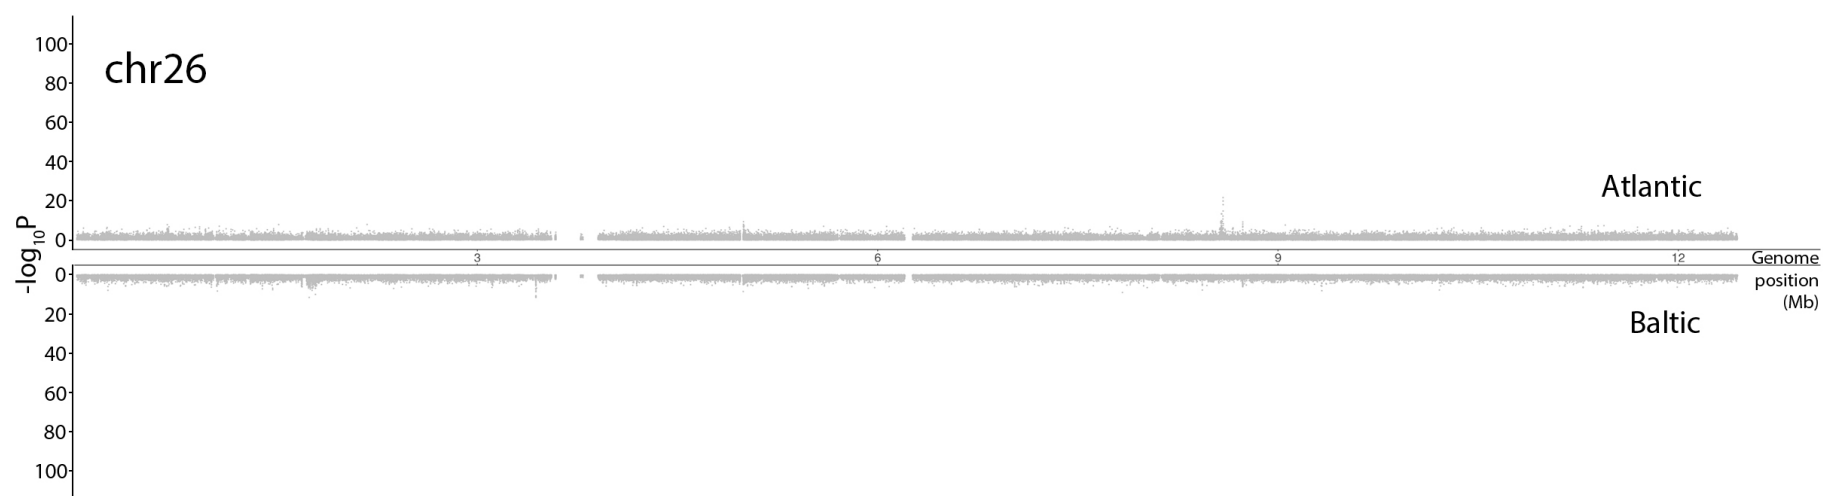

Supplement: supp [file elife-61076-supp-v1.zip]

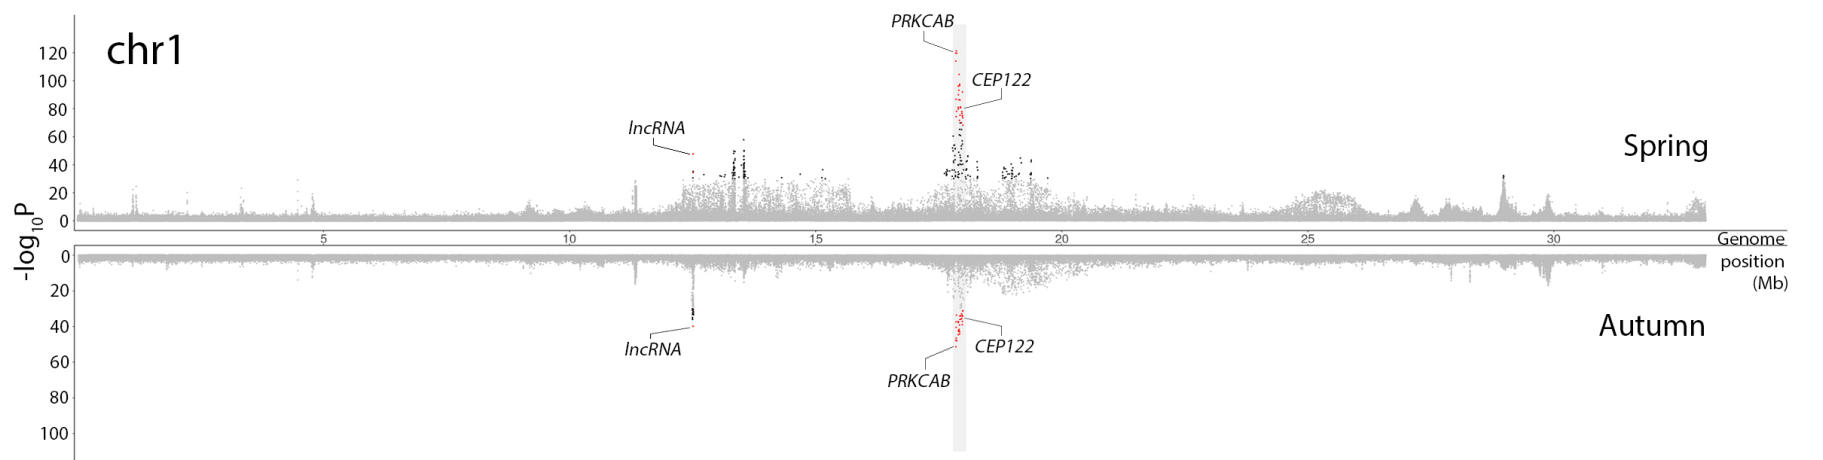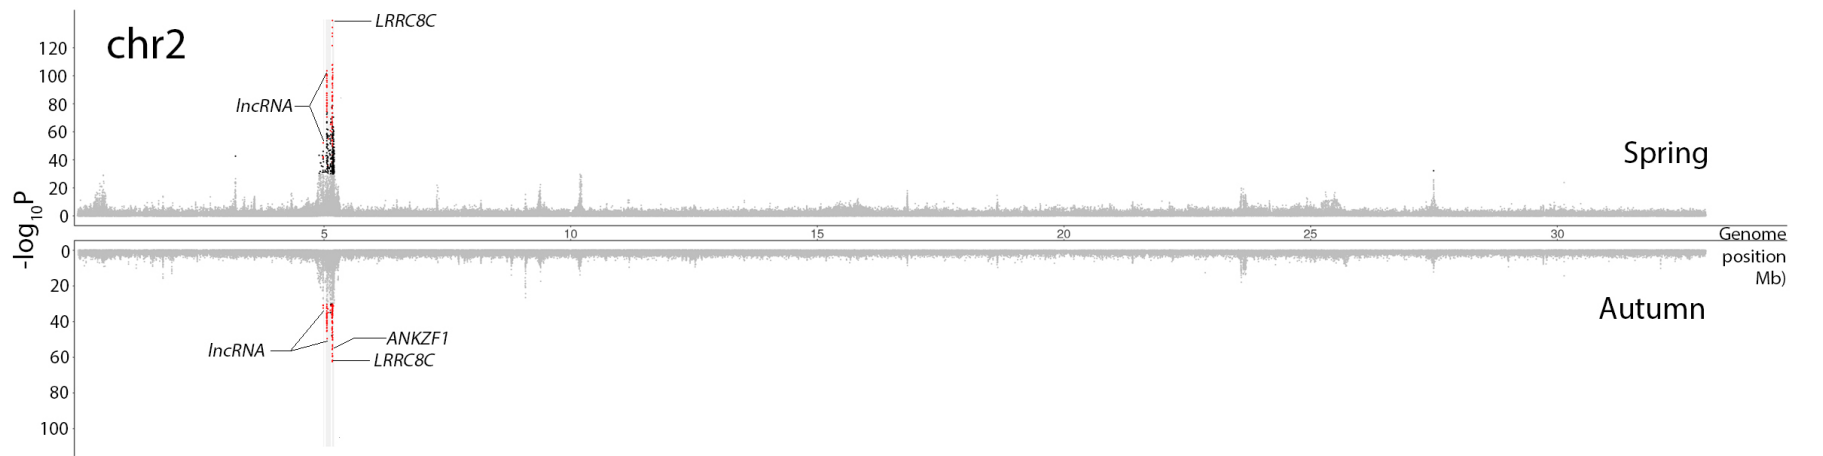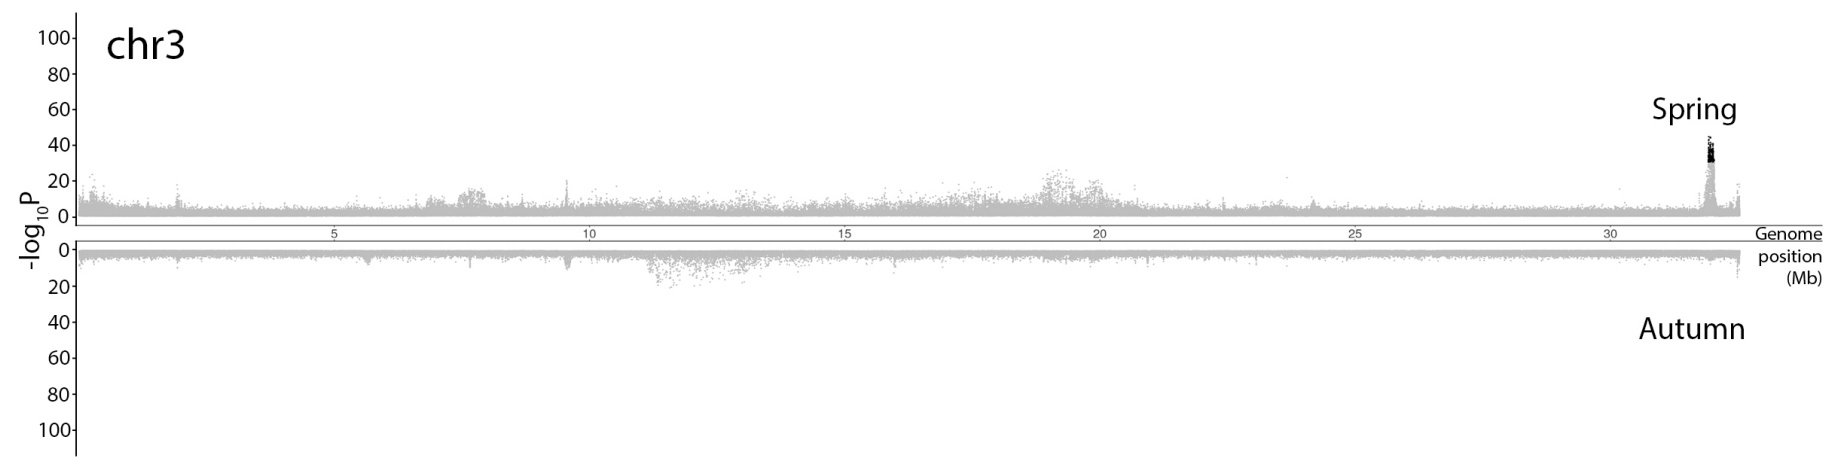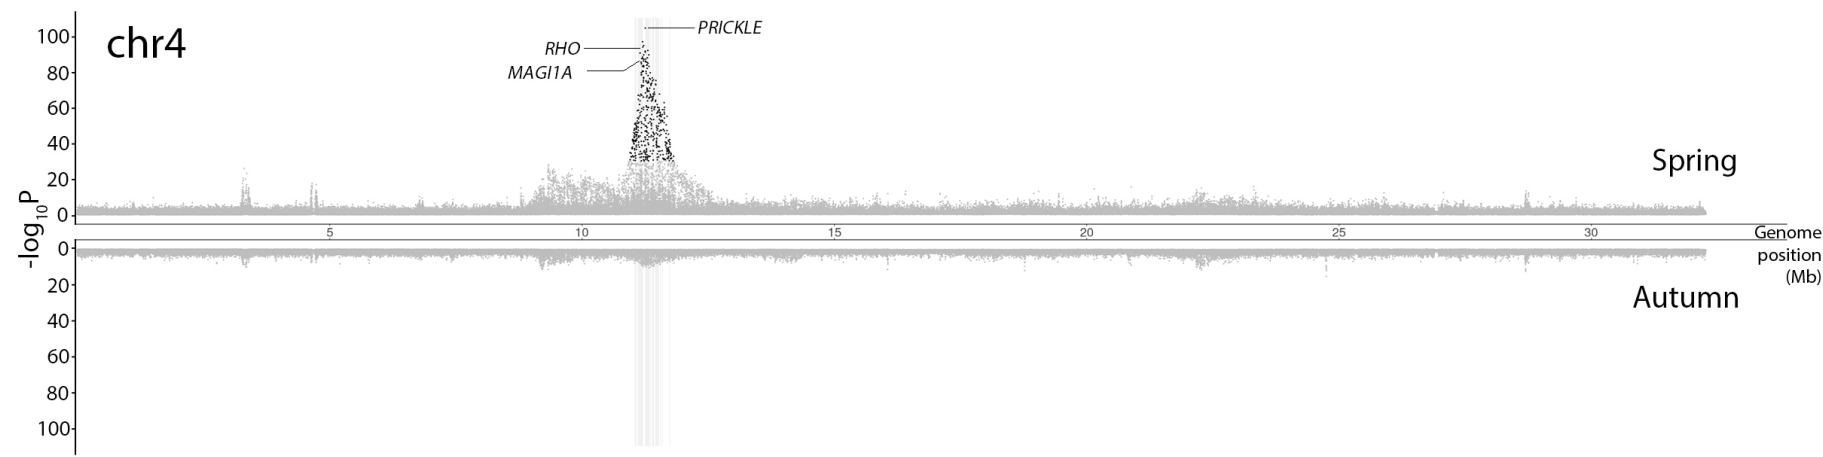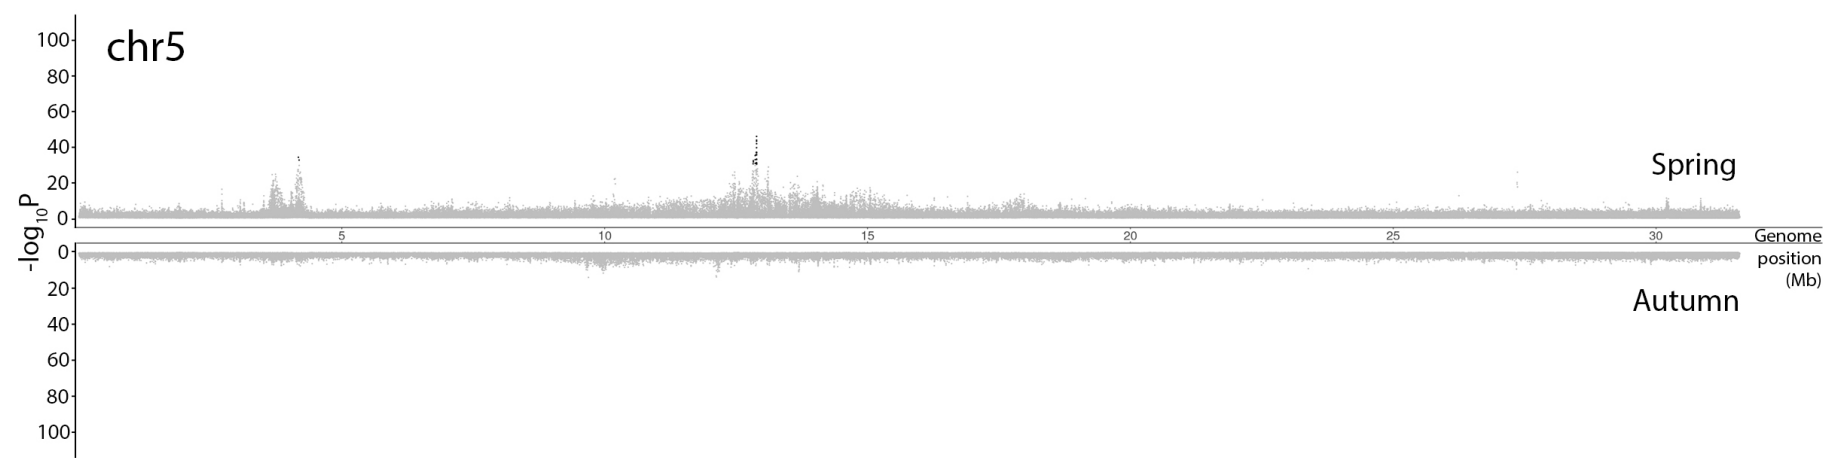

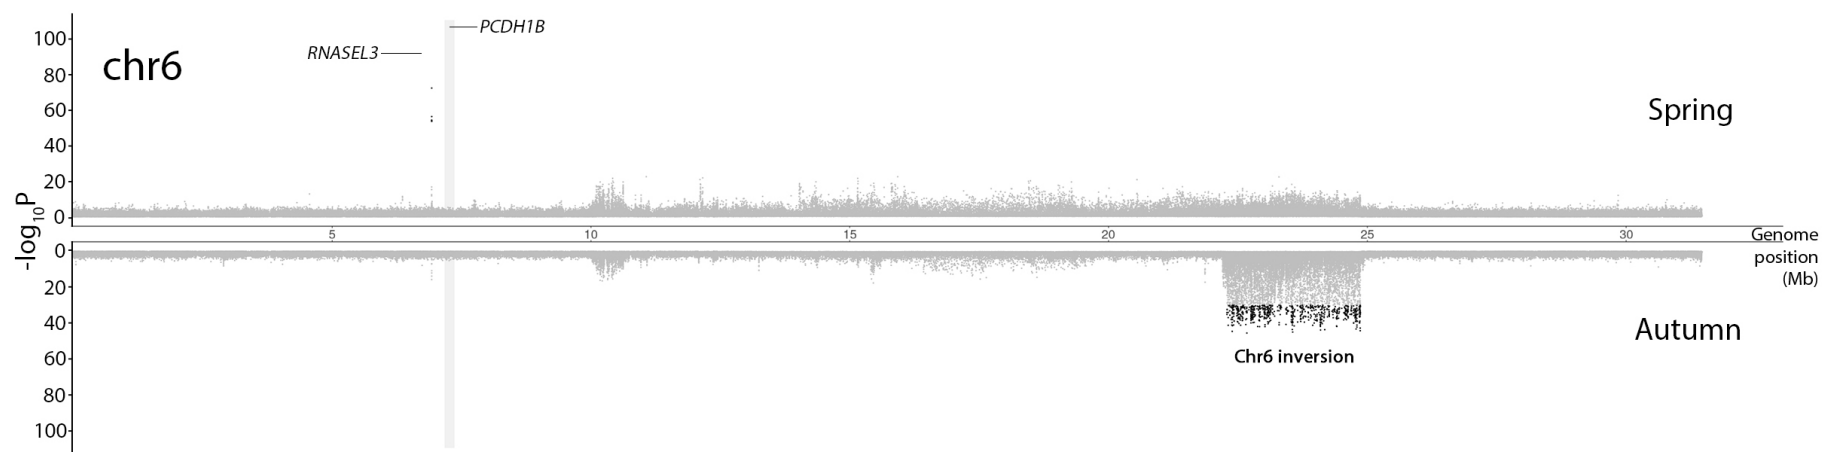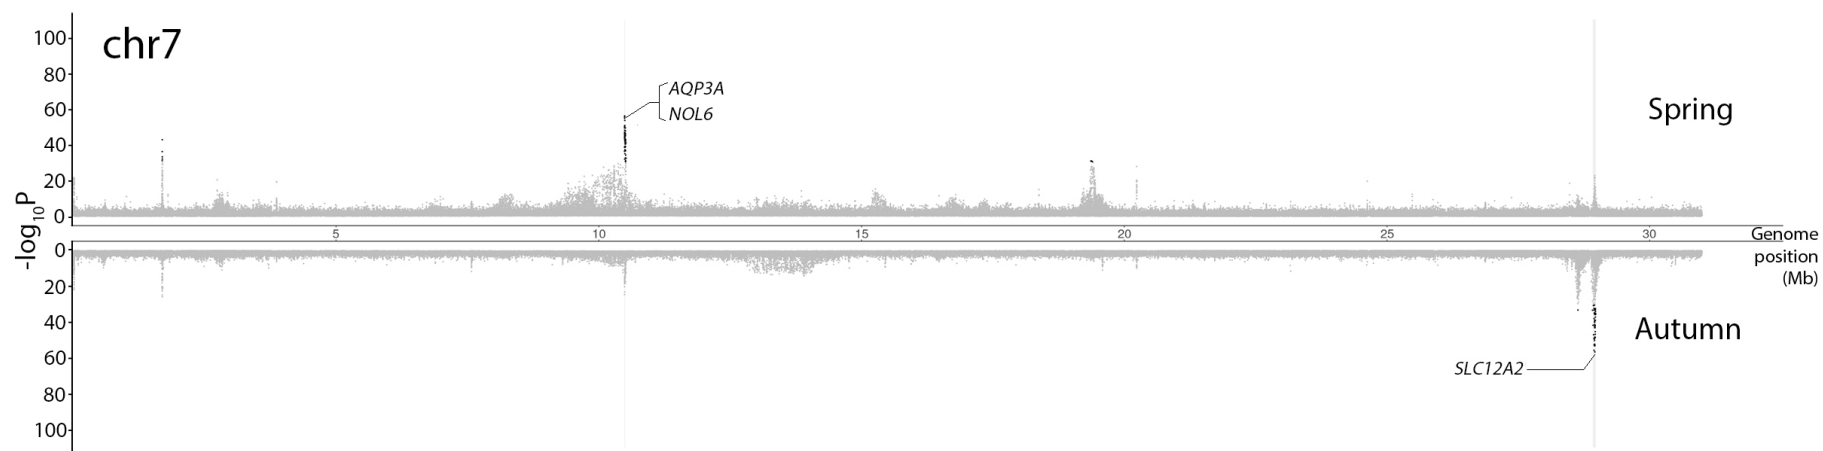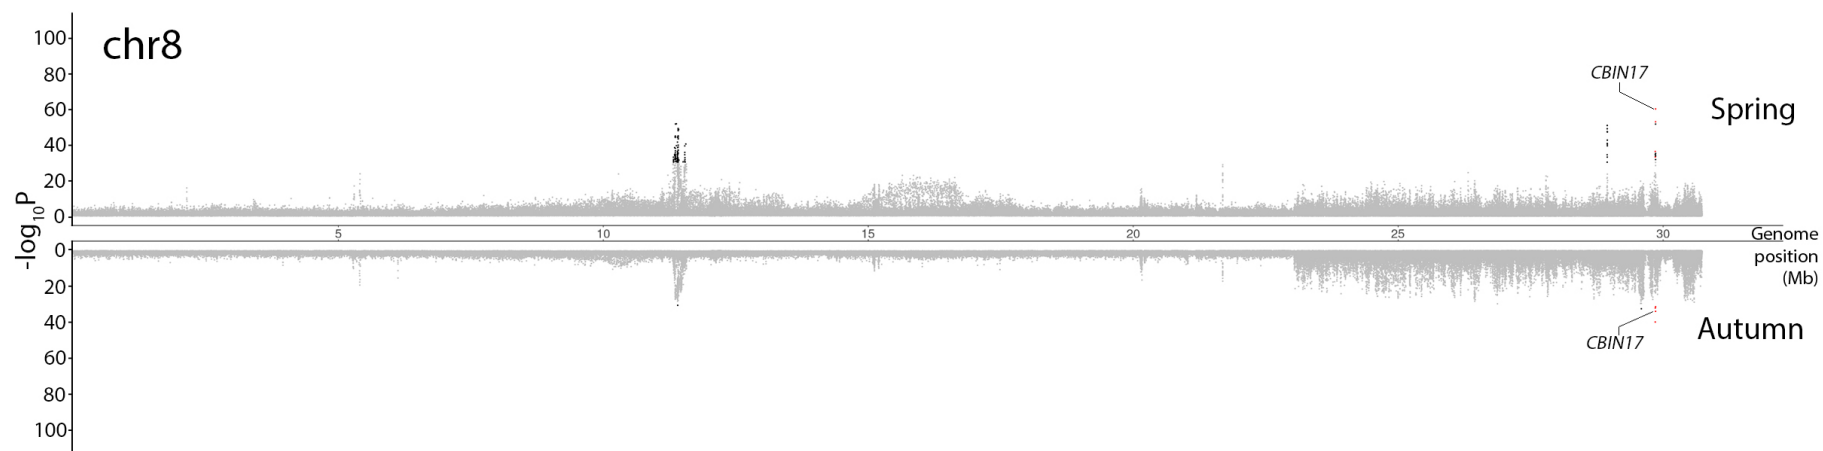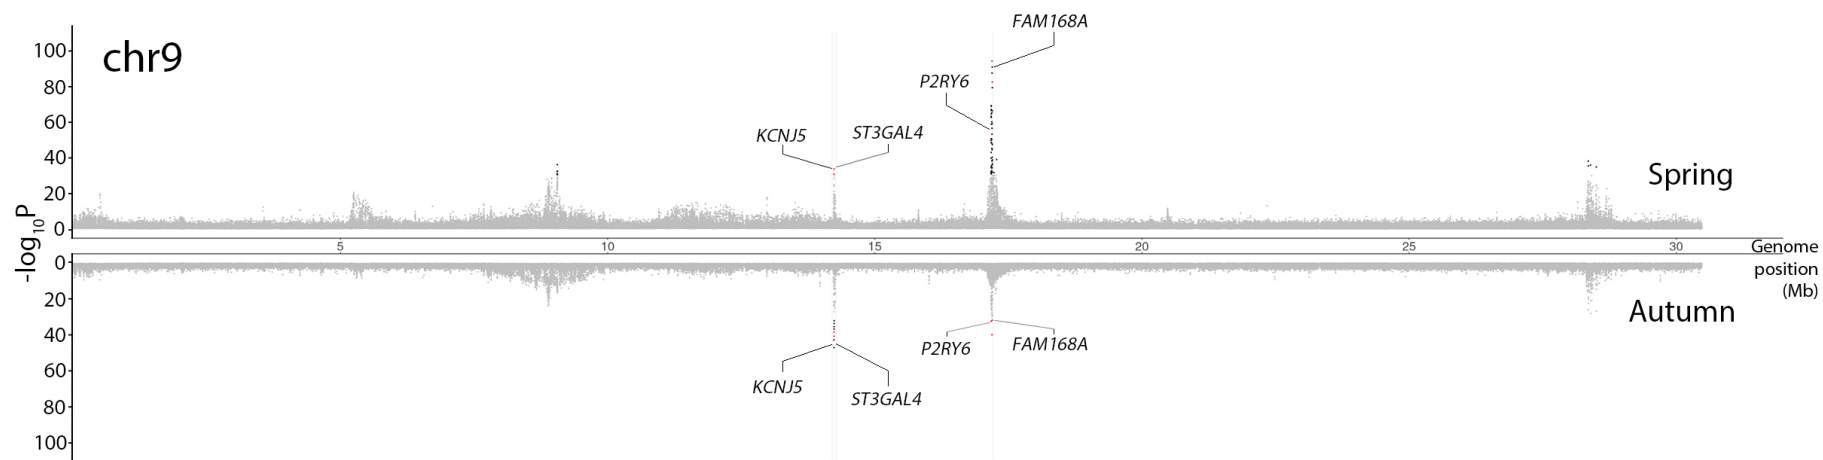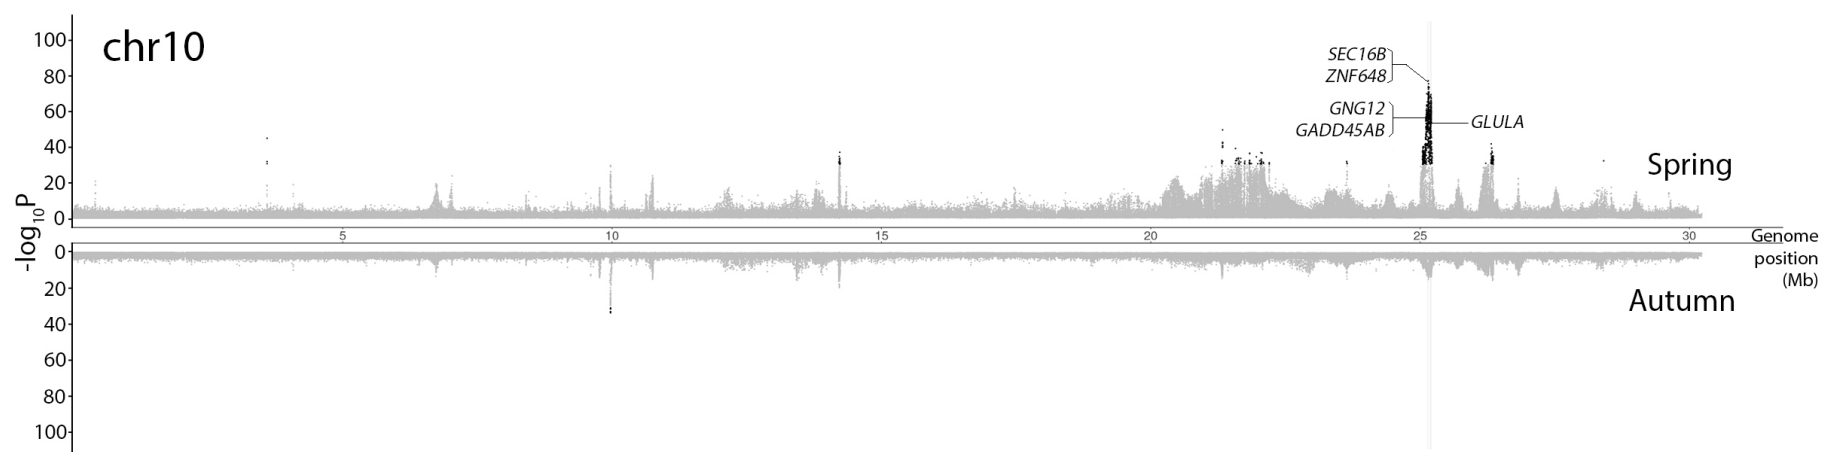

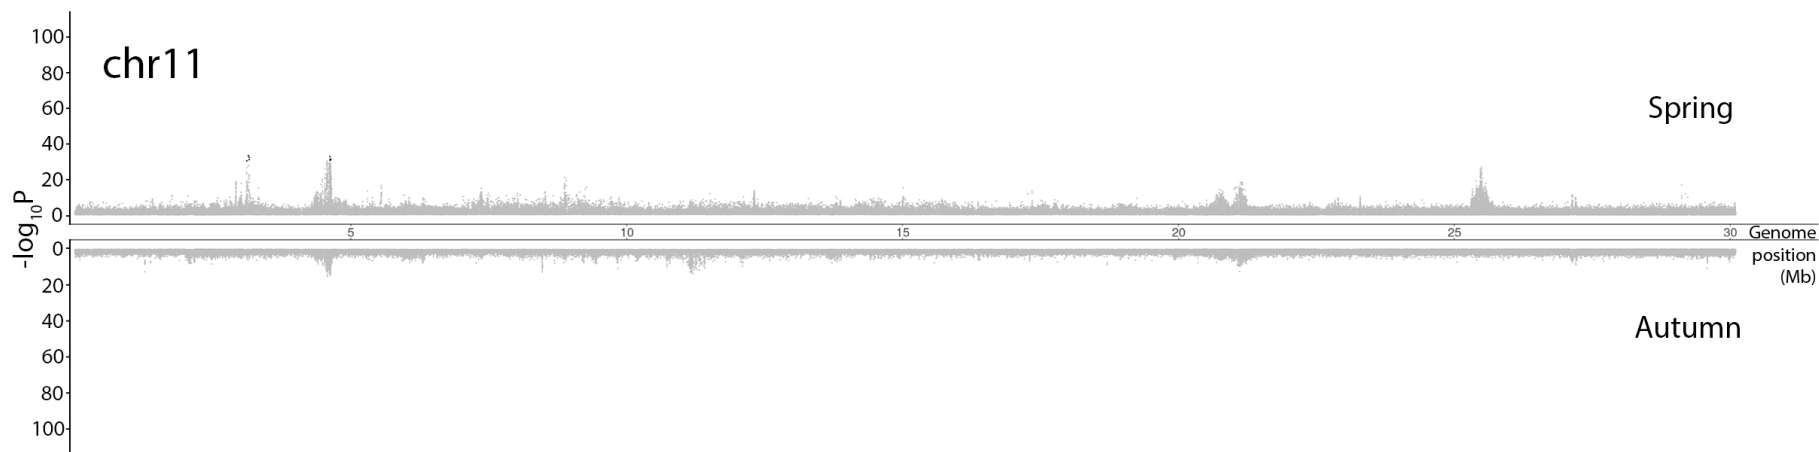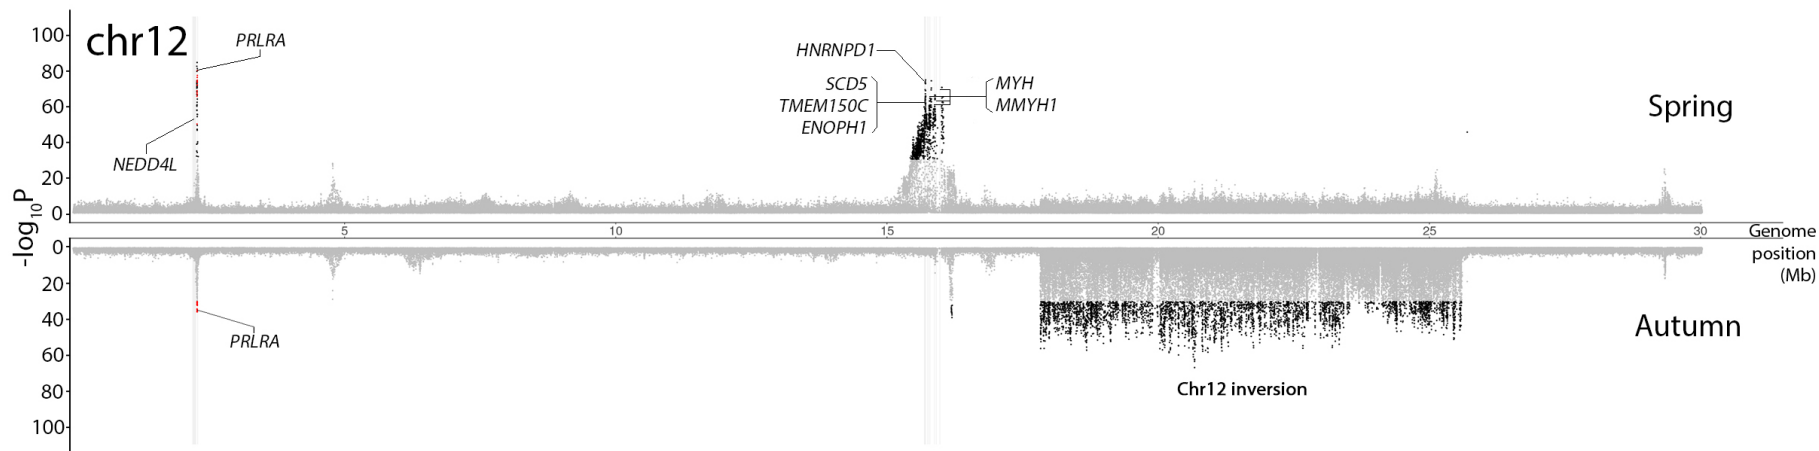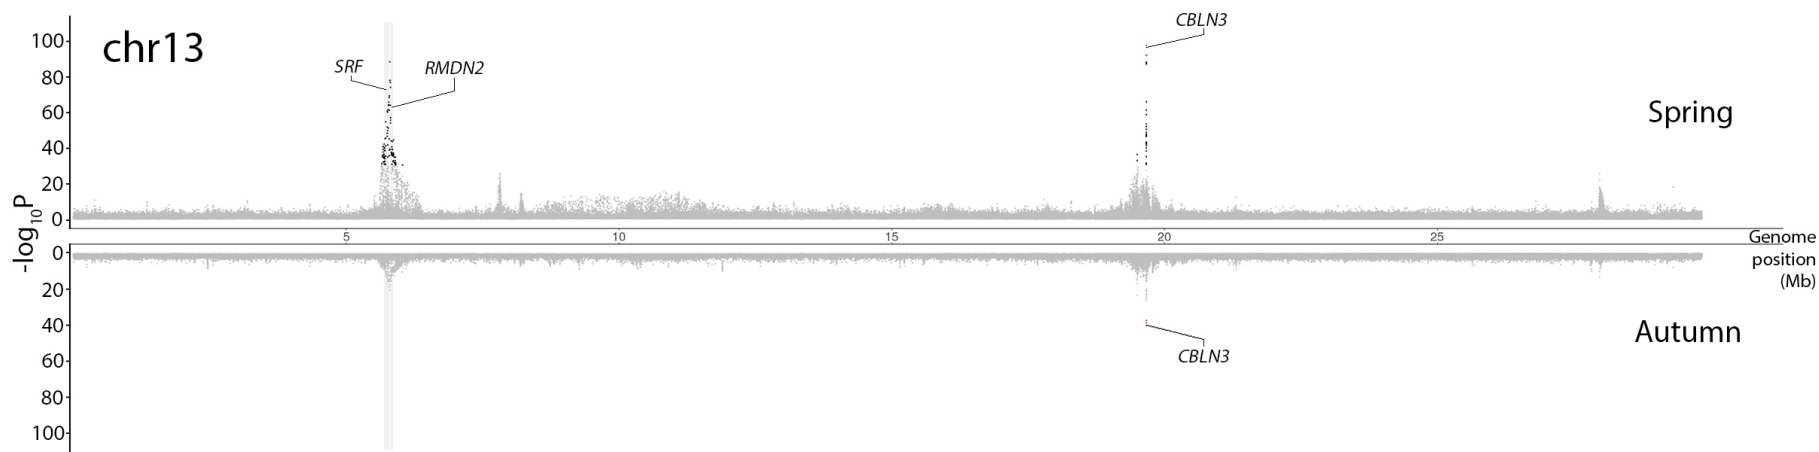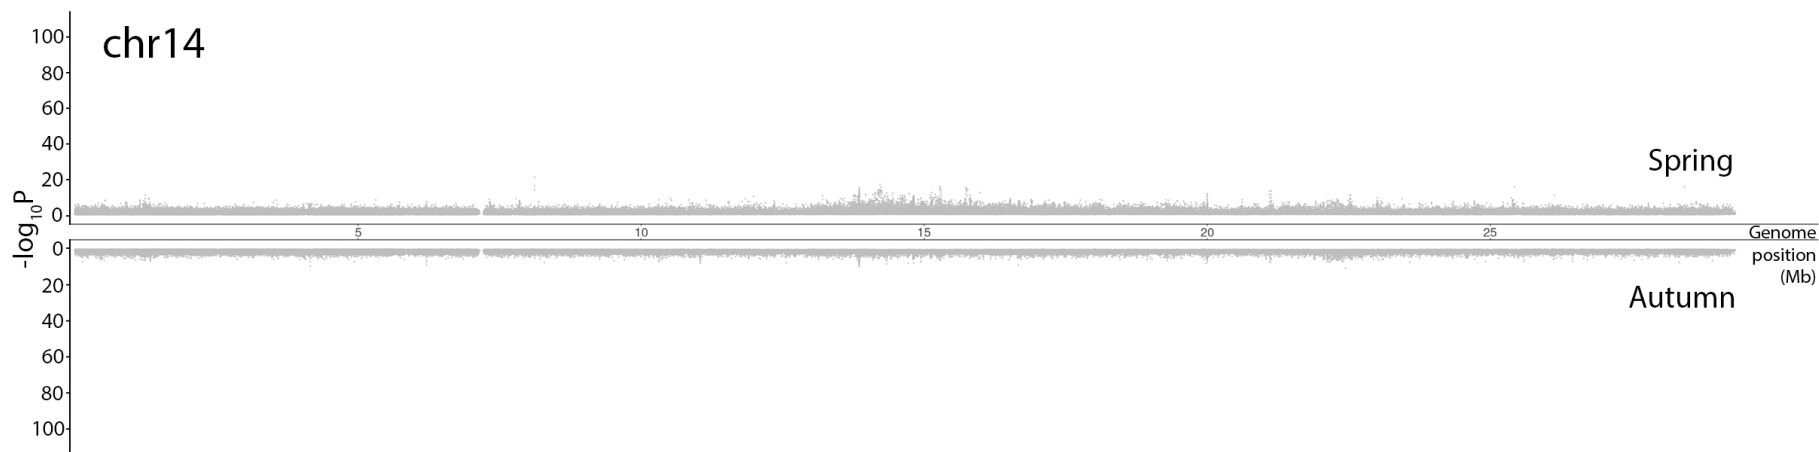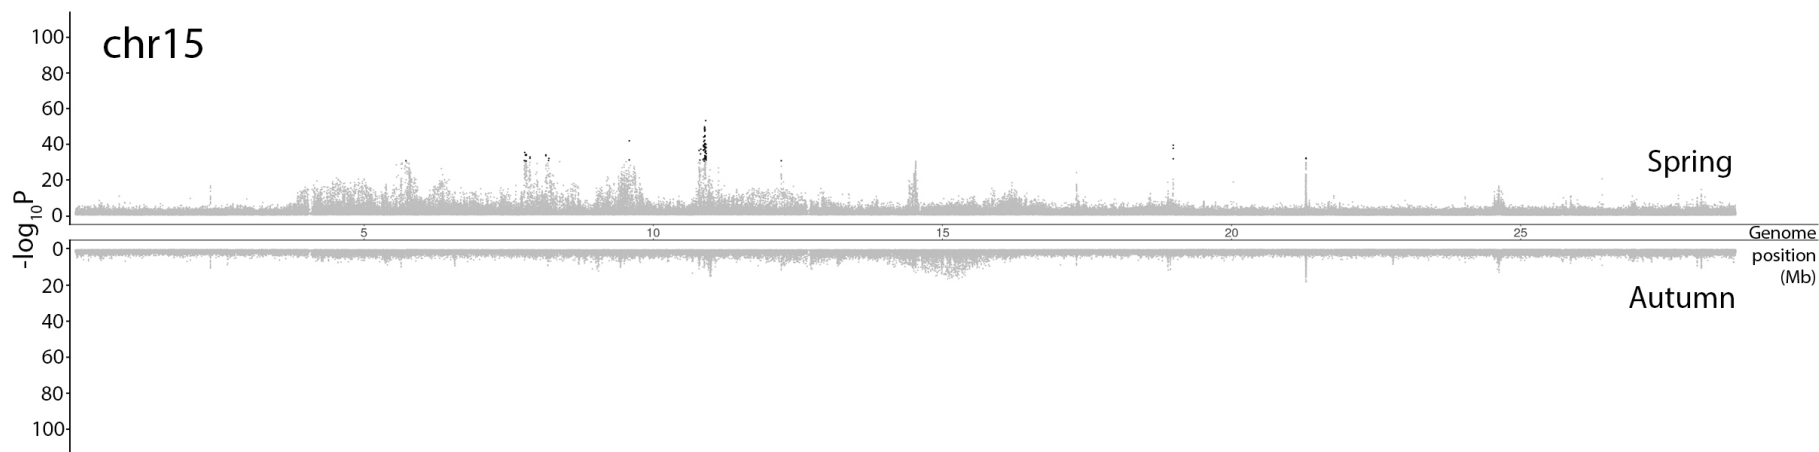

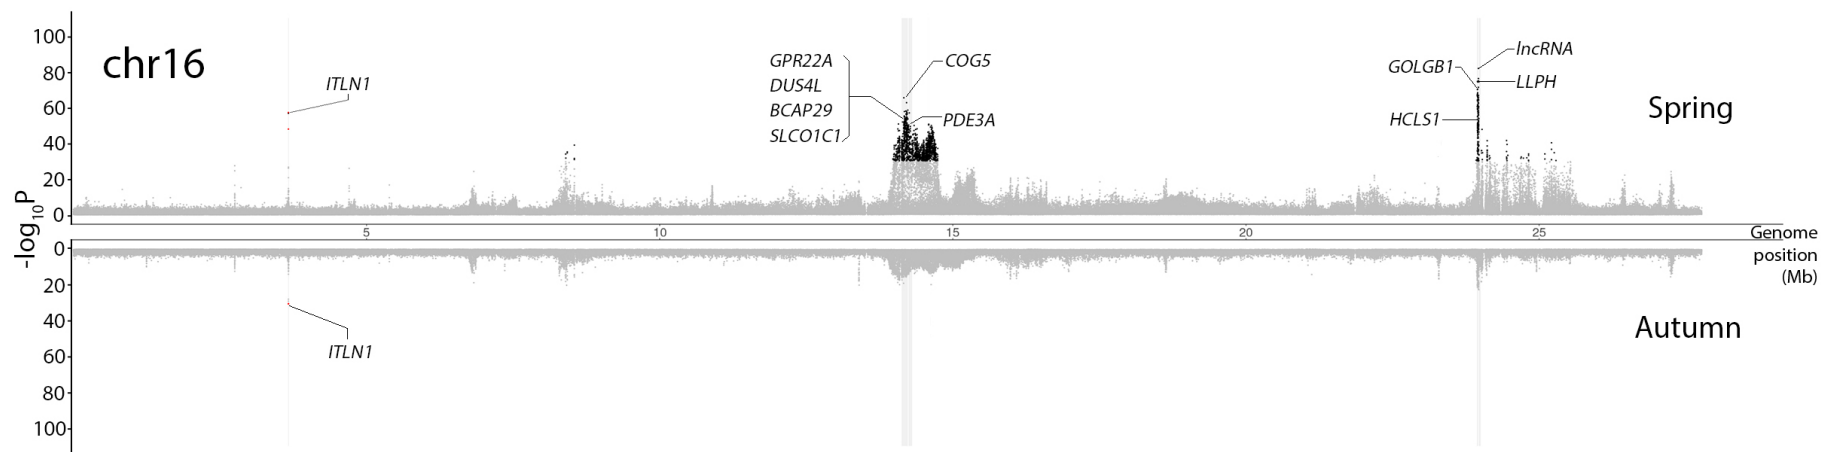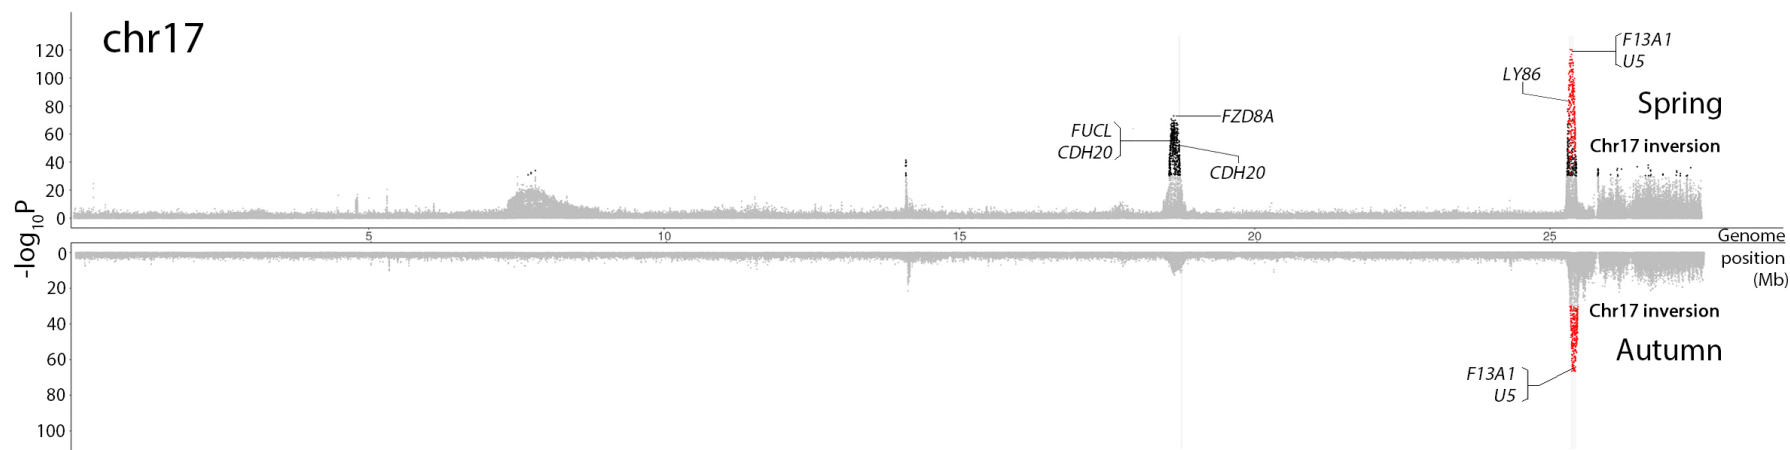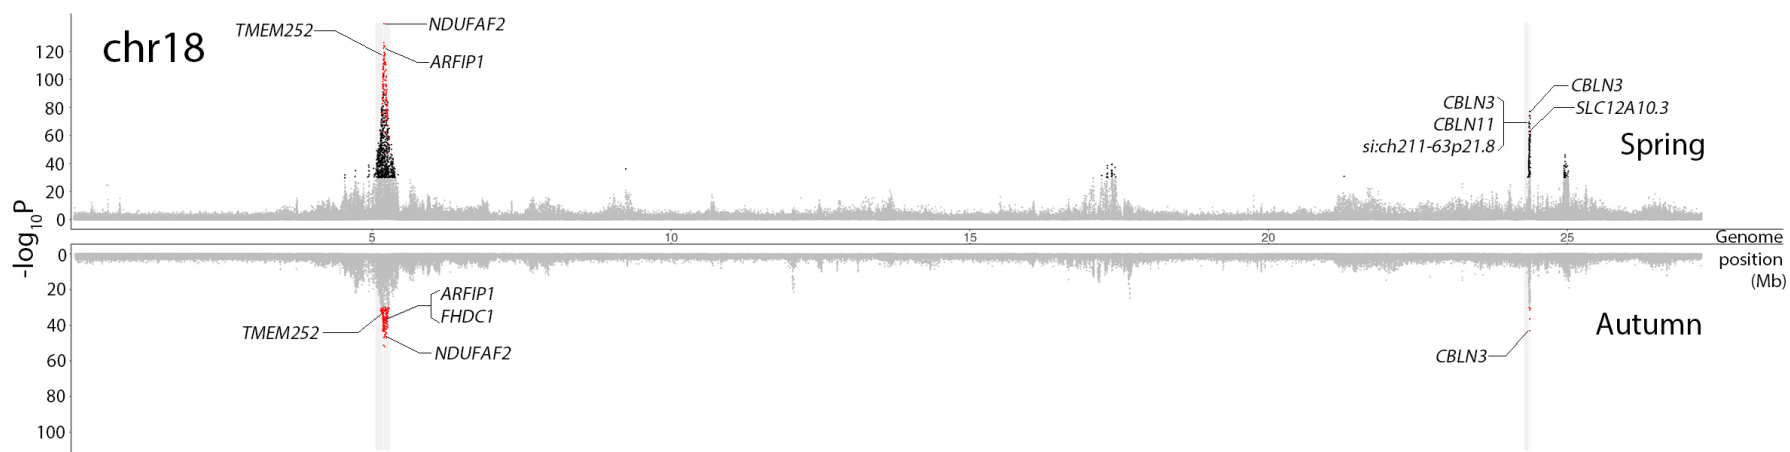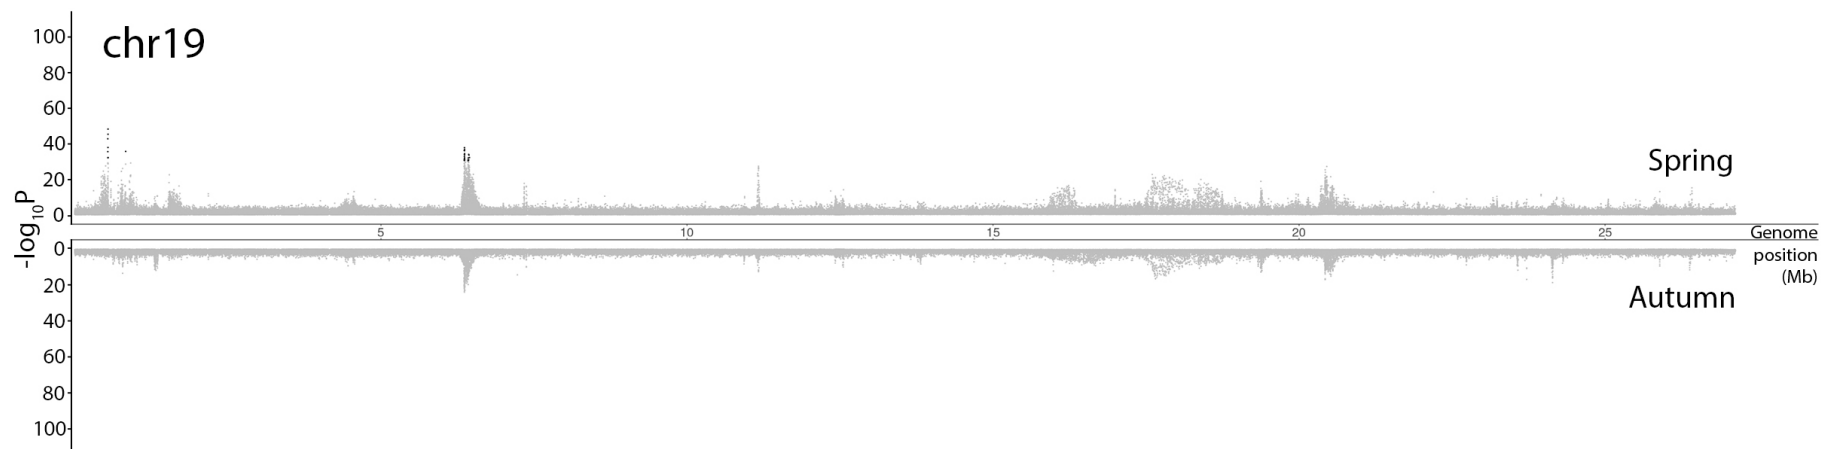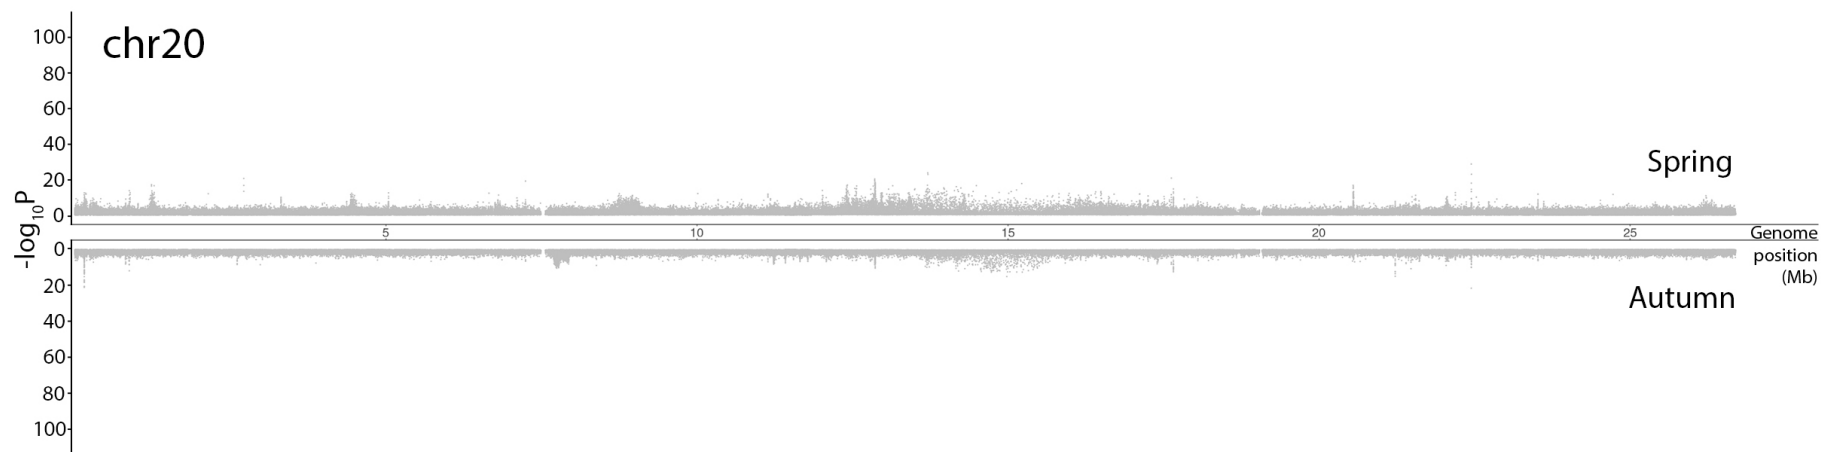

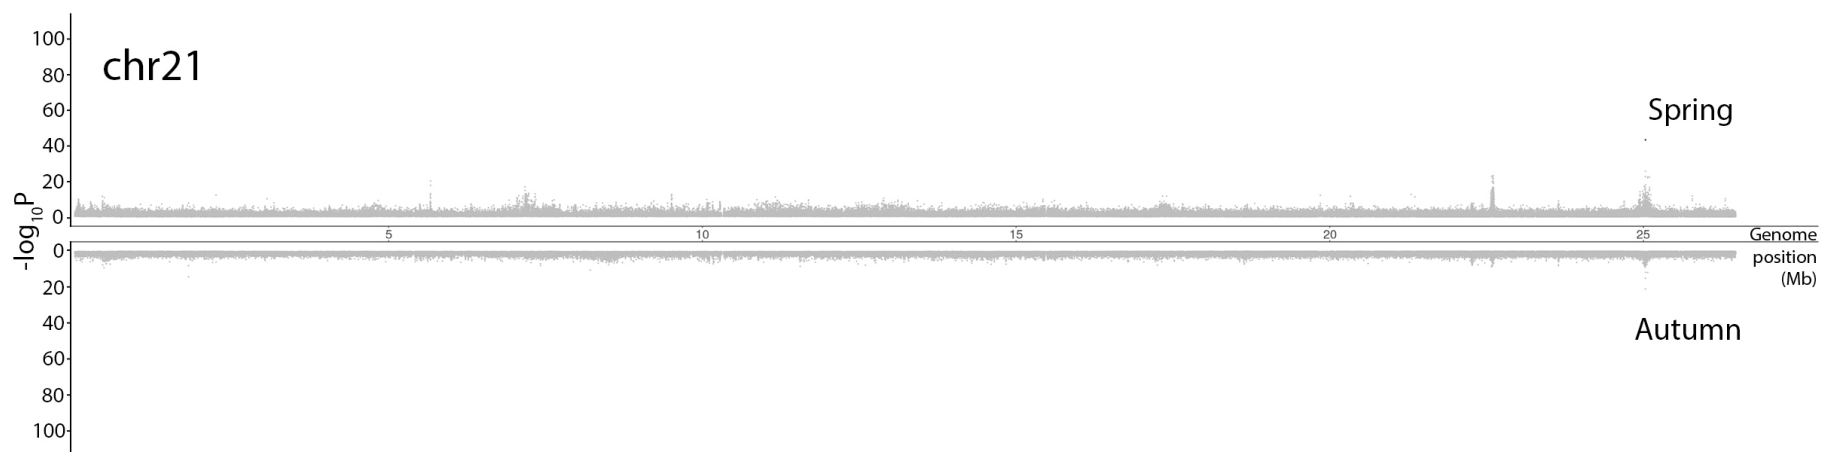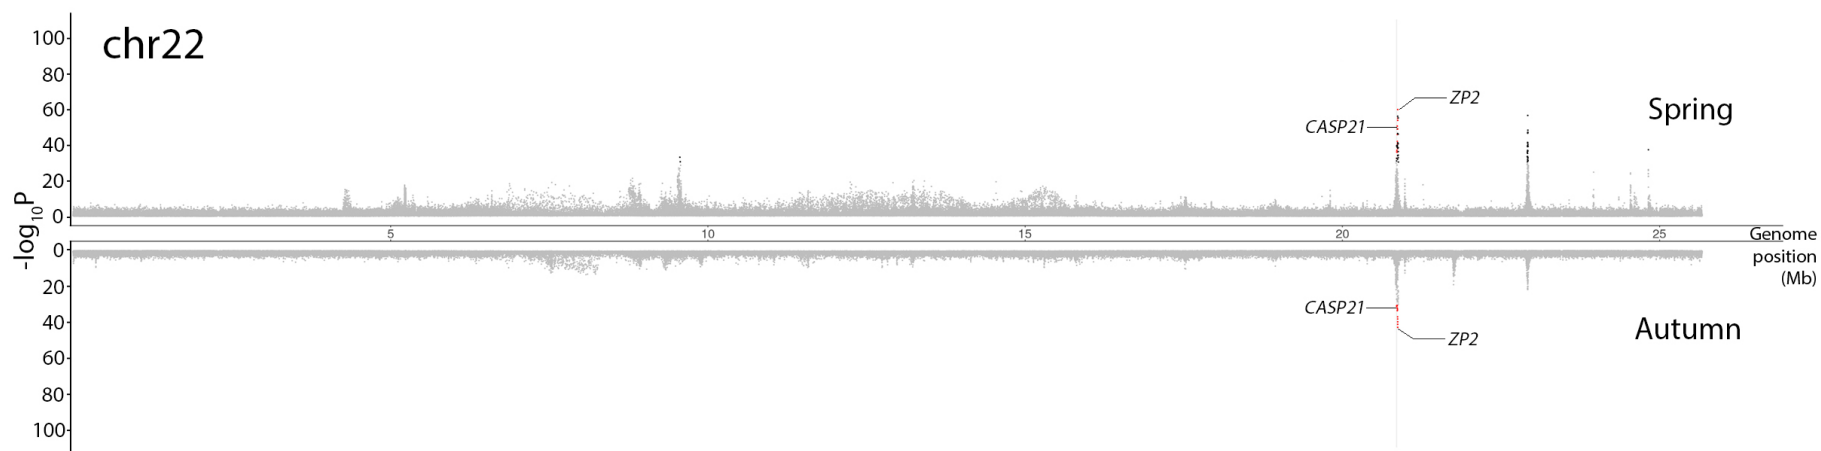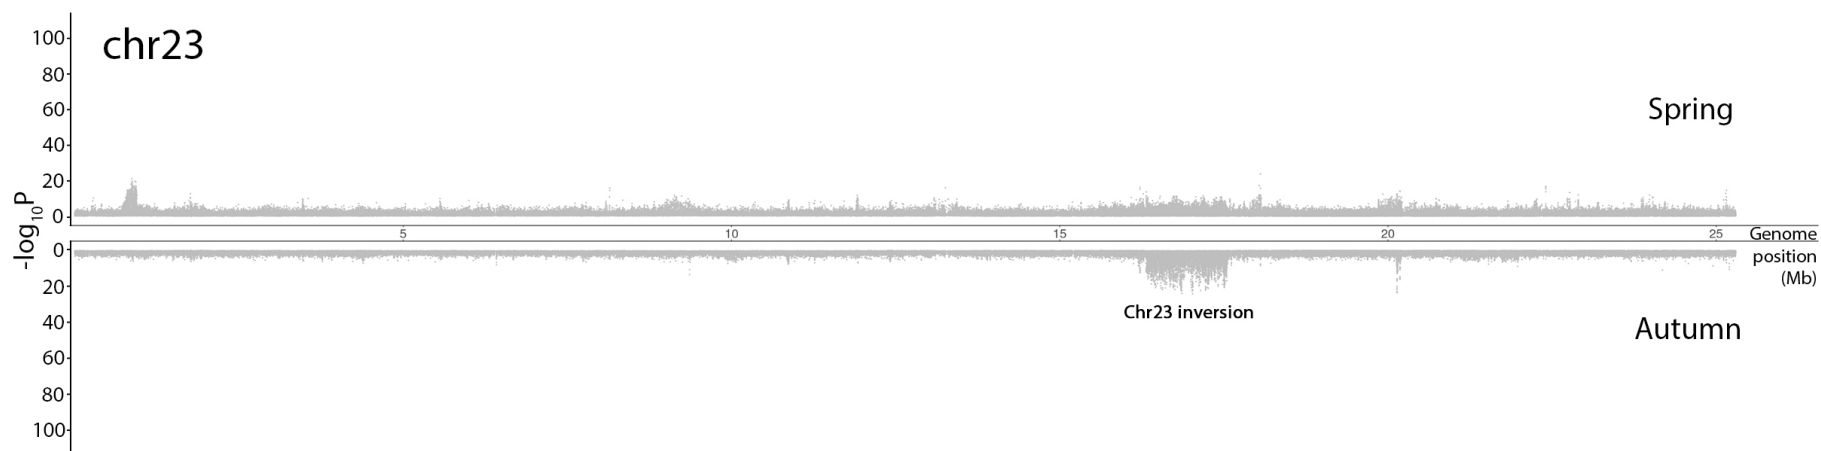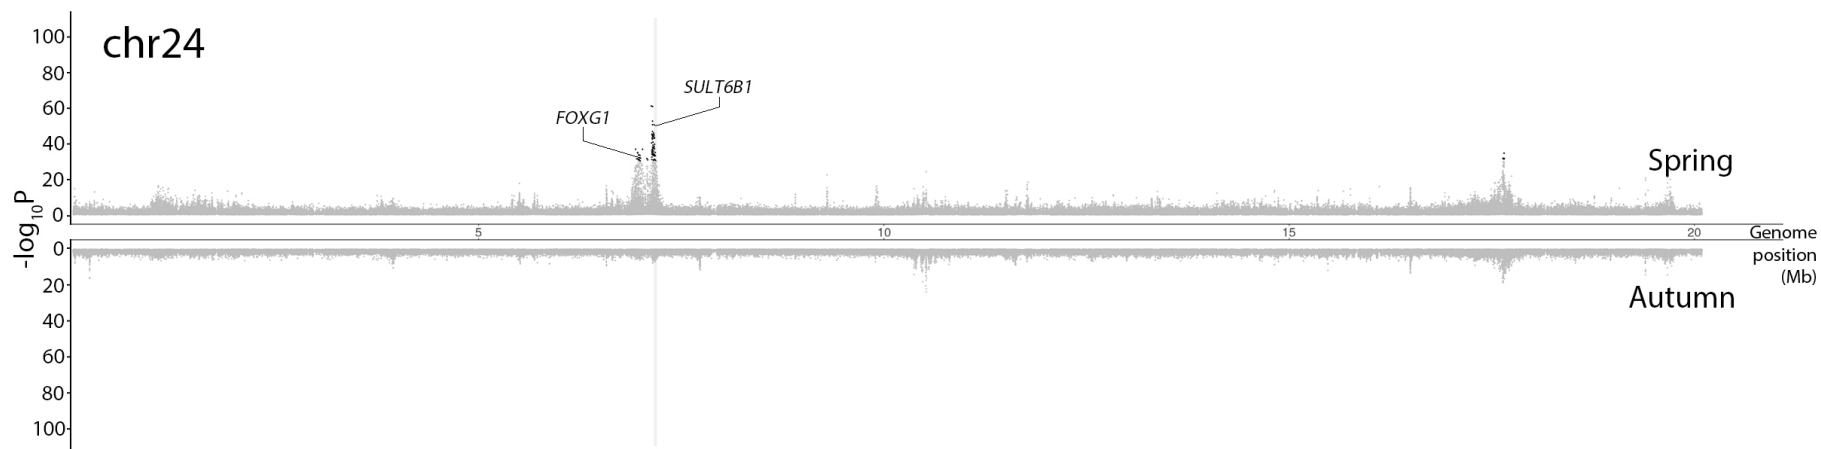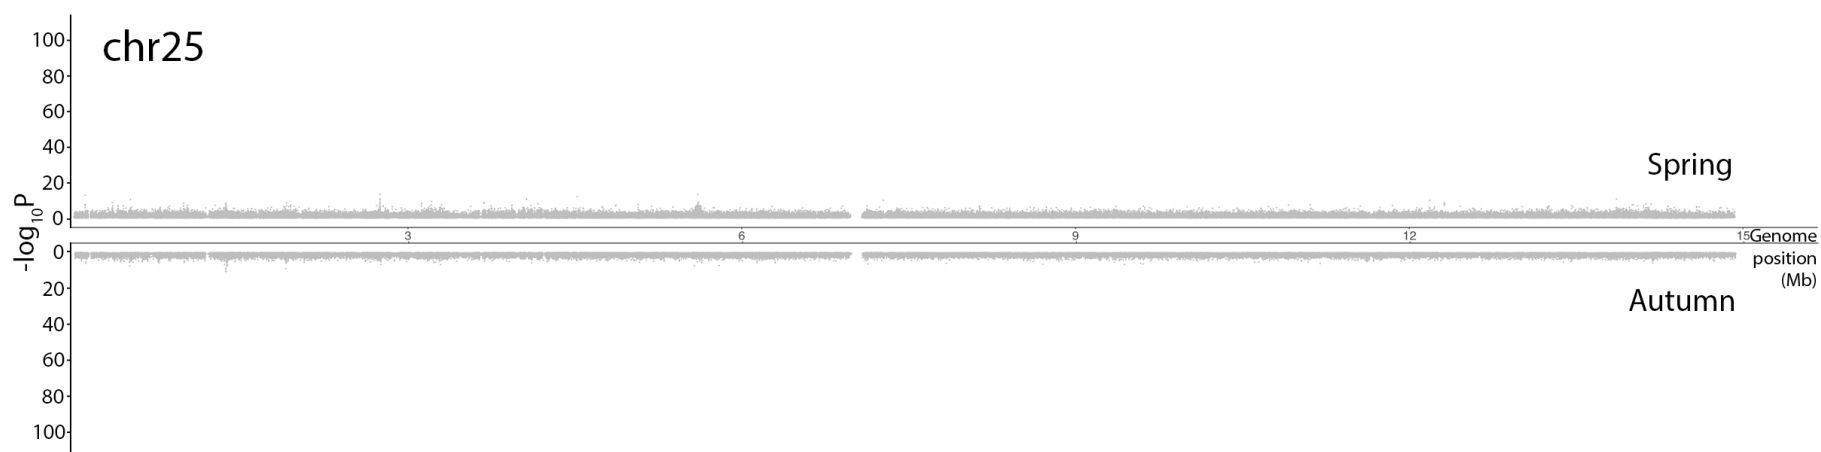

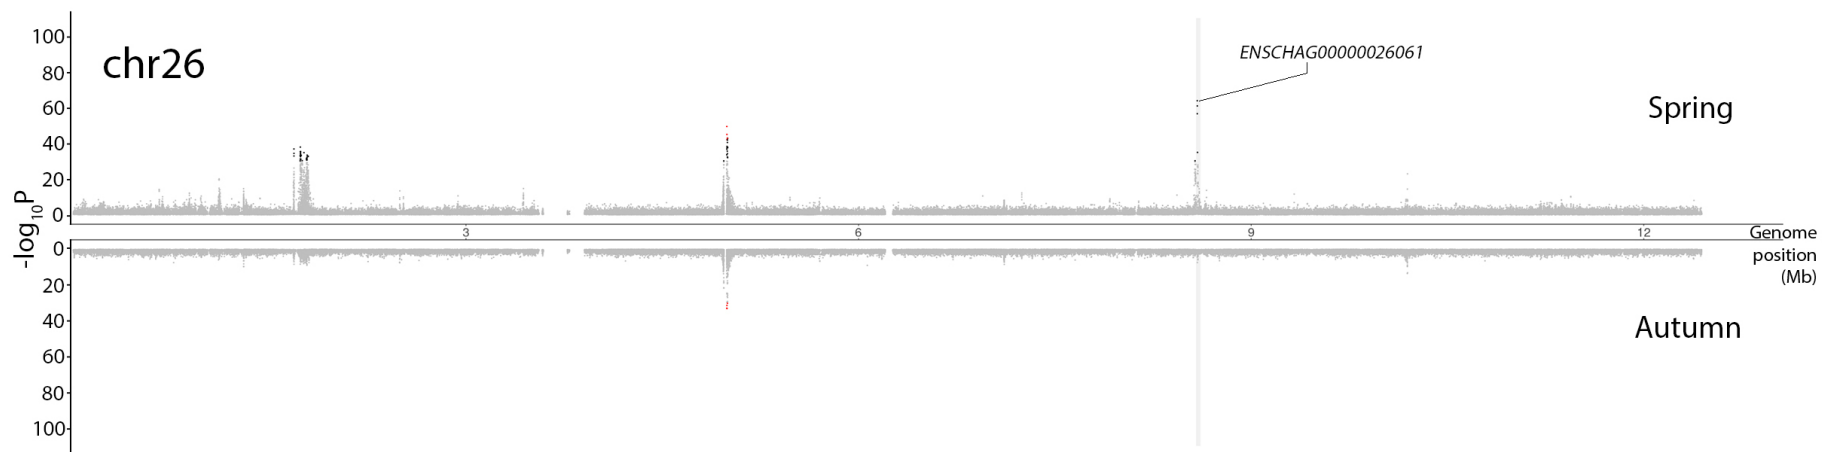

Supplement: supp [file elife-61076-supp-v1.zip]

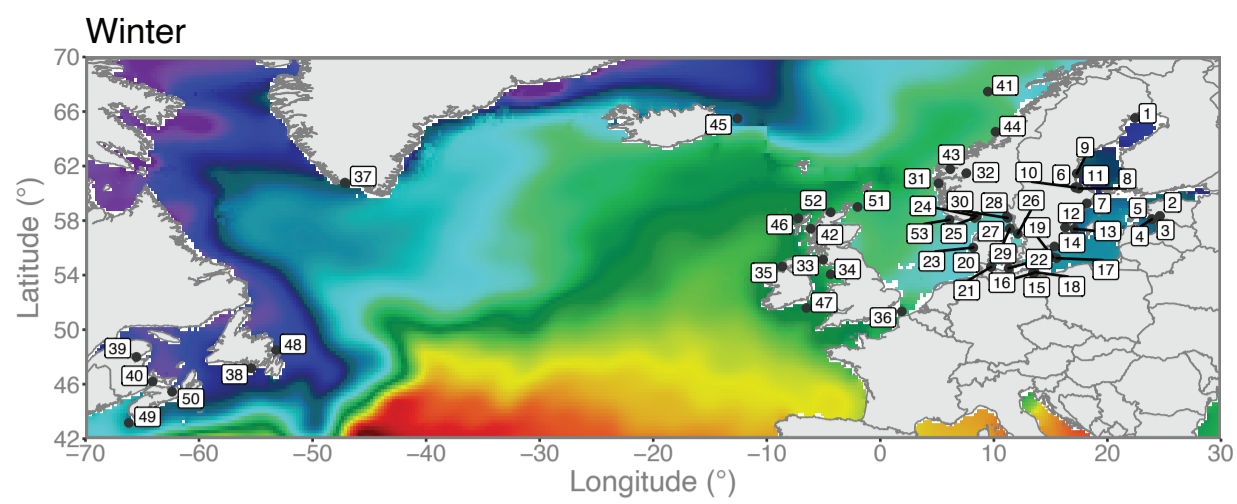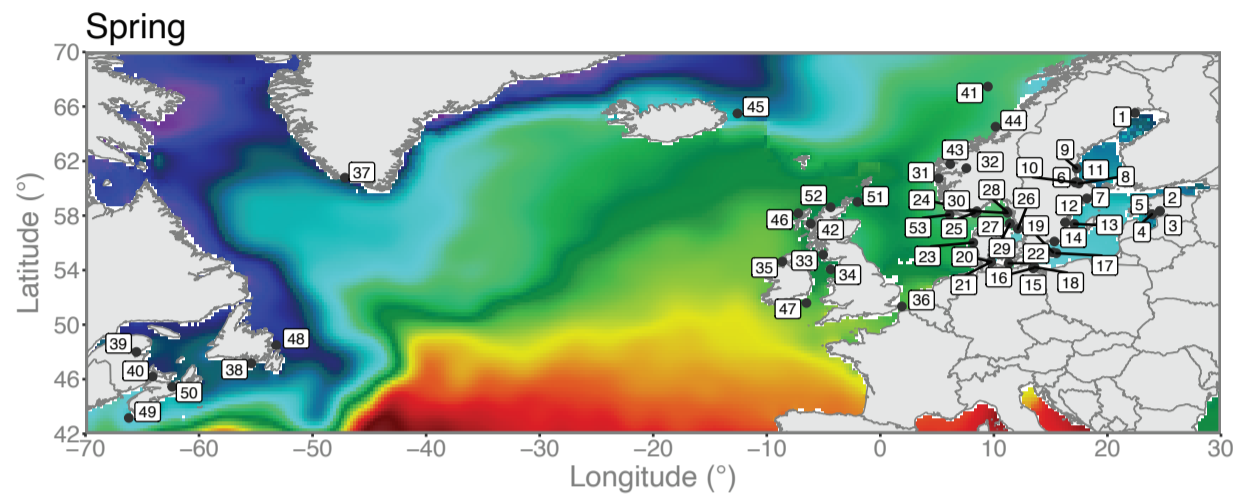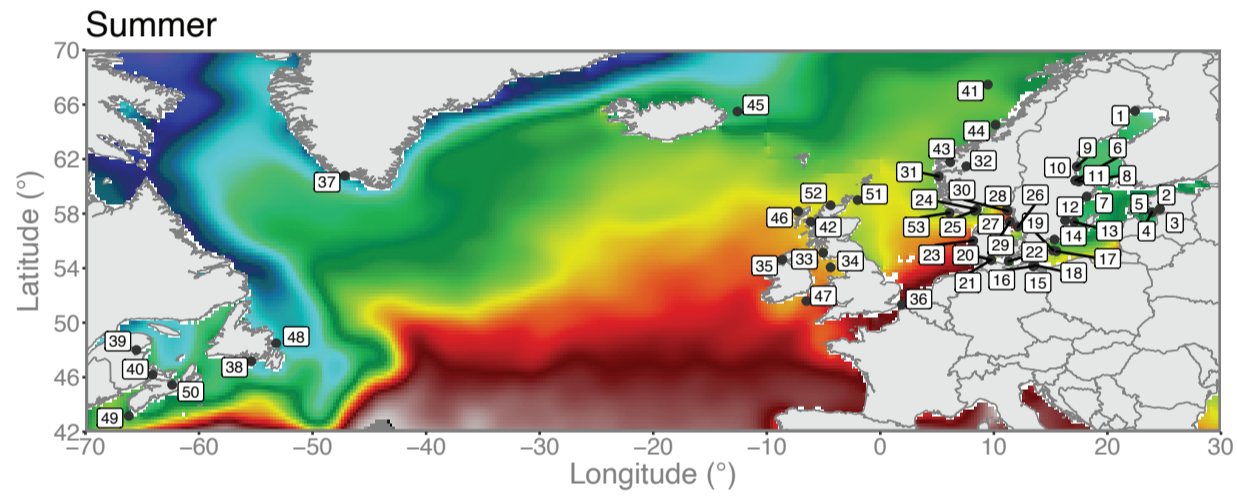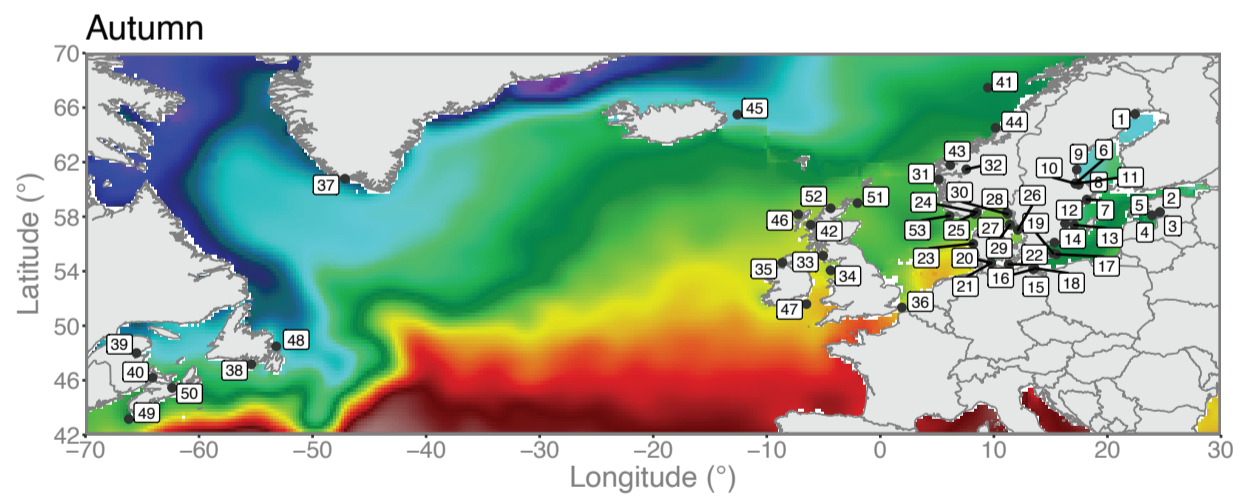

Supplement: supp [file elife-61076-supp-v1.zip › elife_poa_e61076_Figure_1_figure_supplement_1.pdf]

**a**

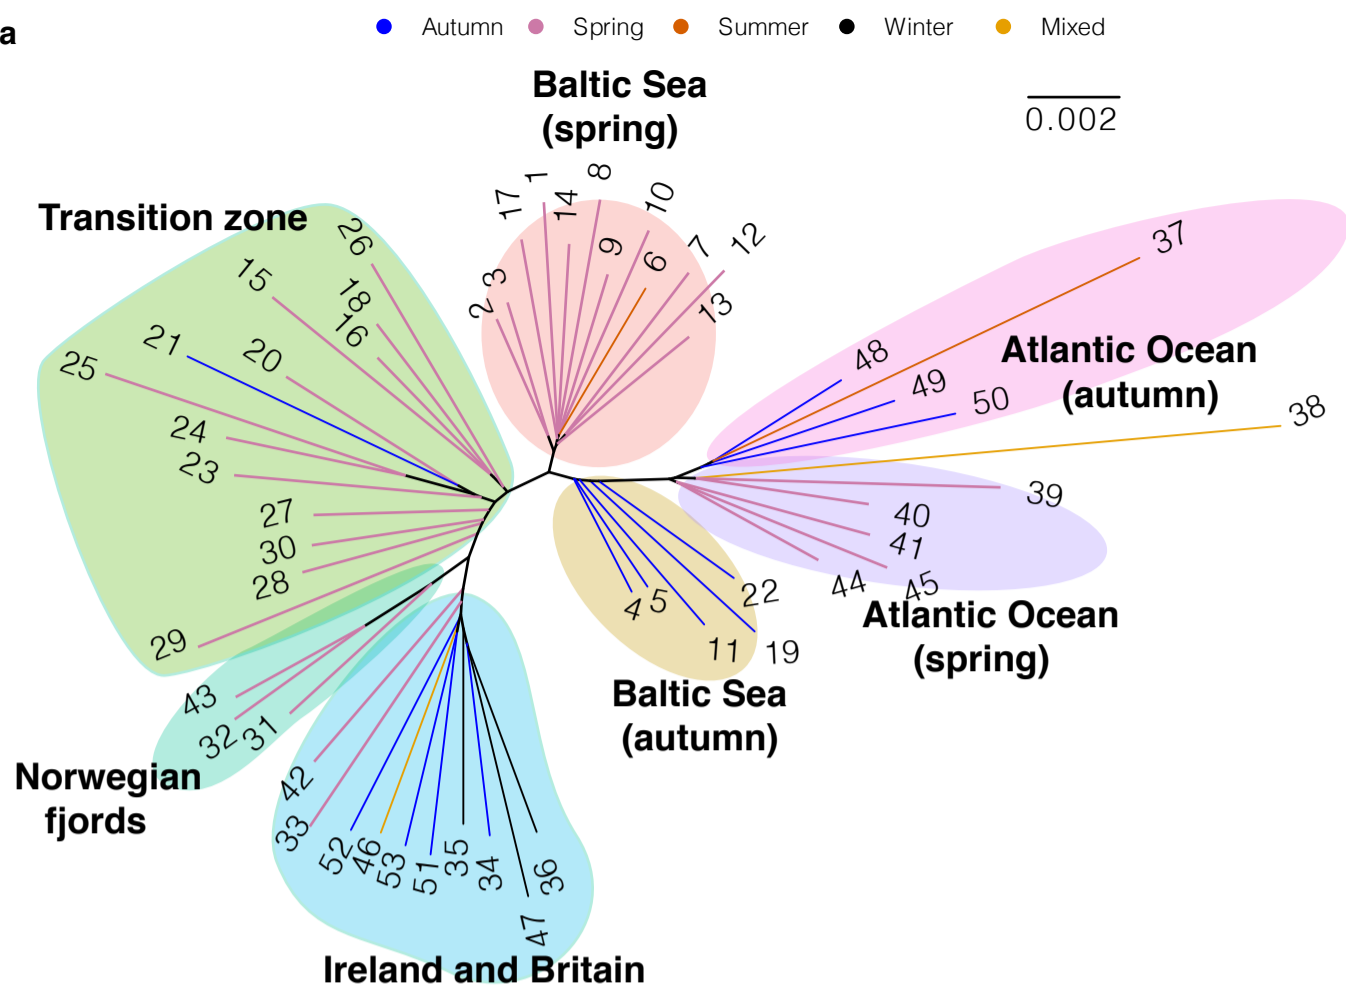

**b**

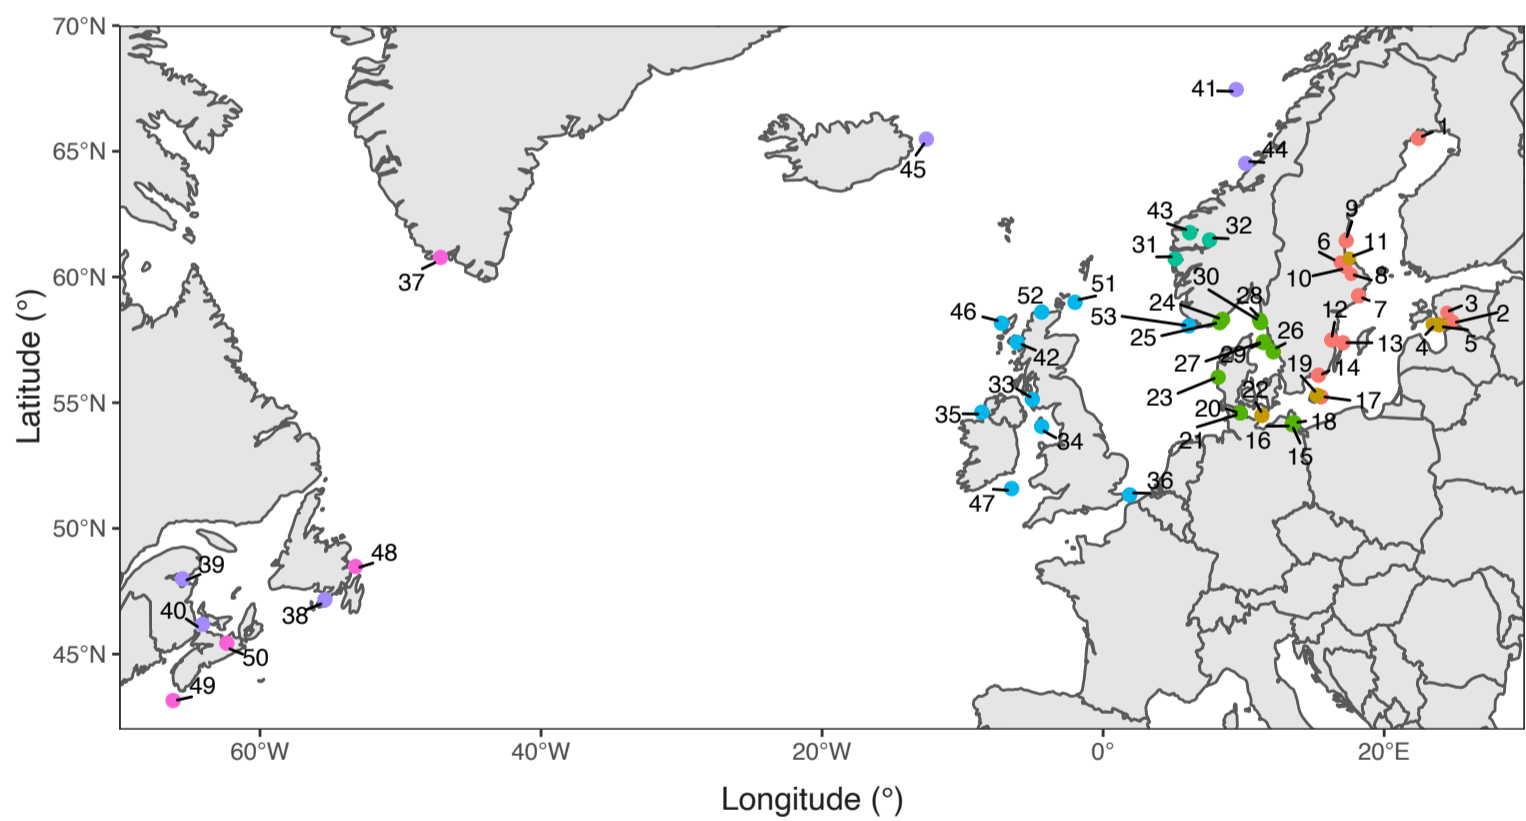

Supplement: supp [file elife-61076-supp-v1.zip › elife_poa_e61076_Figure_2_figure_supplement_1.pdf]

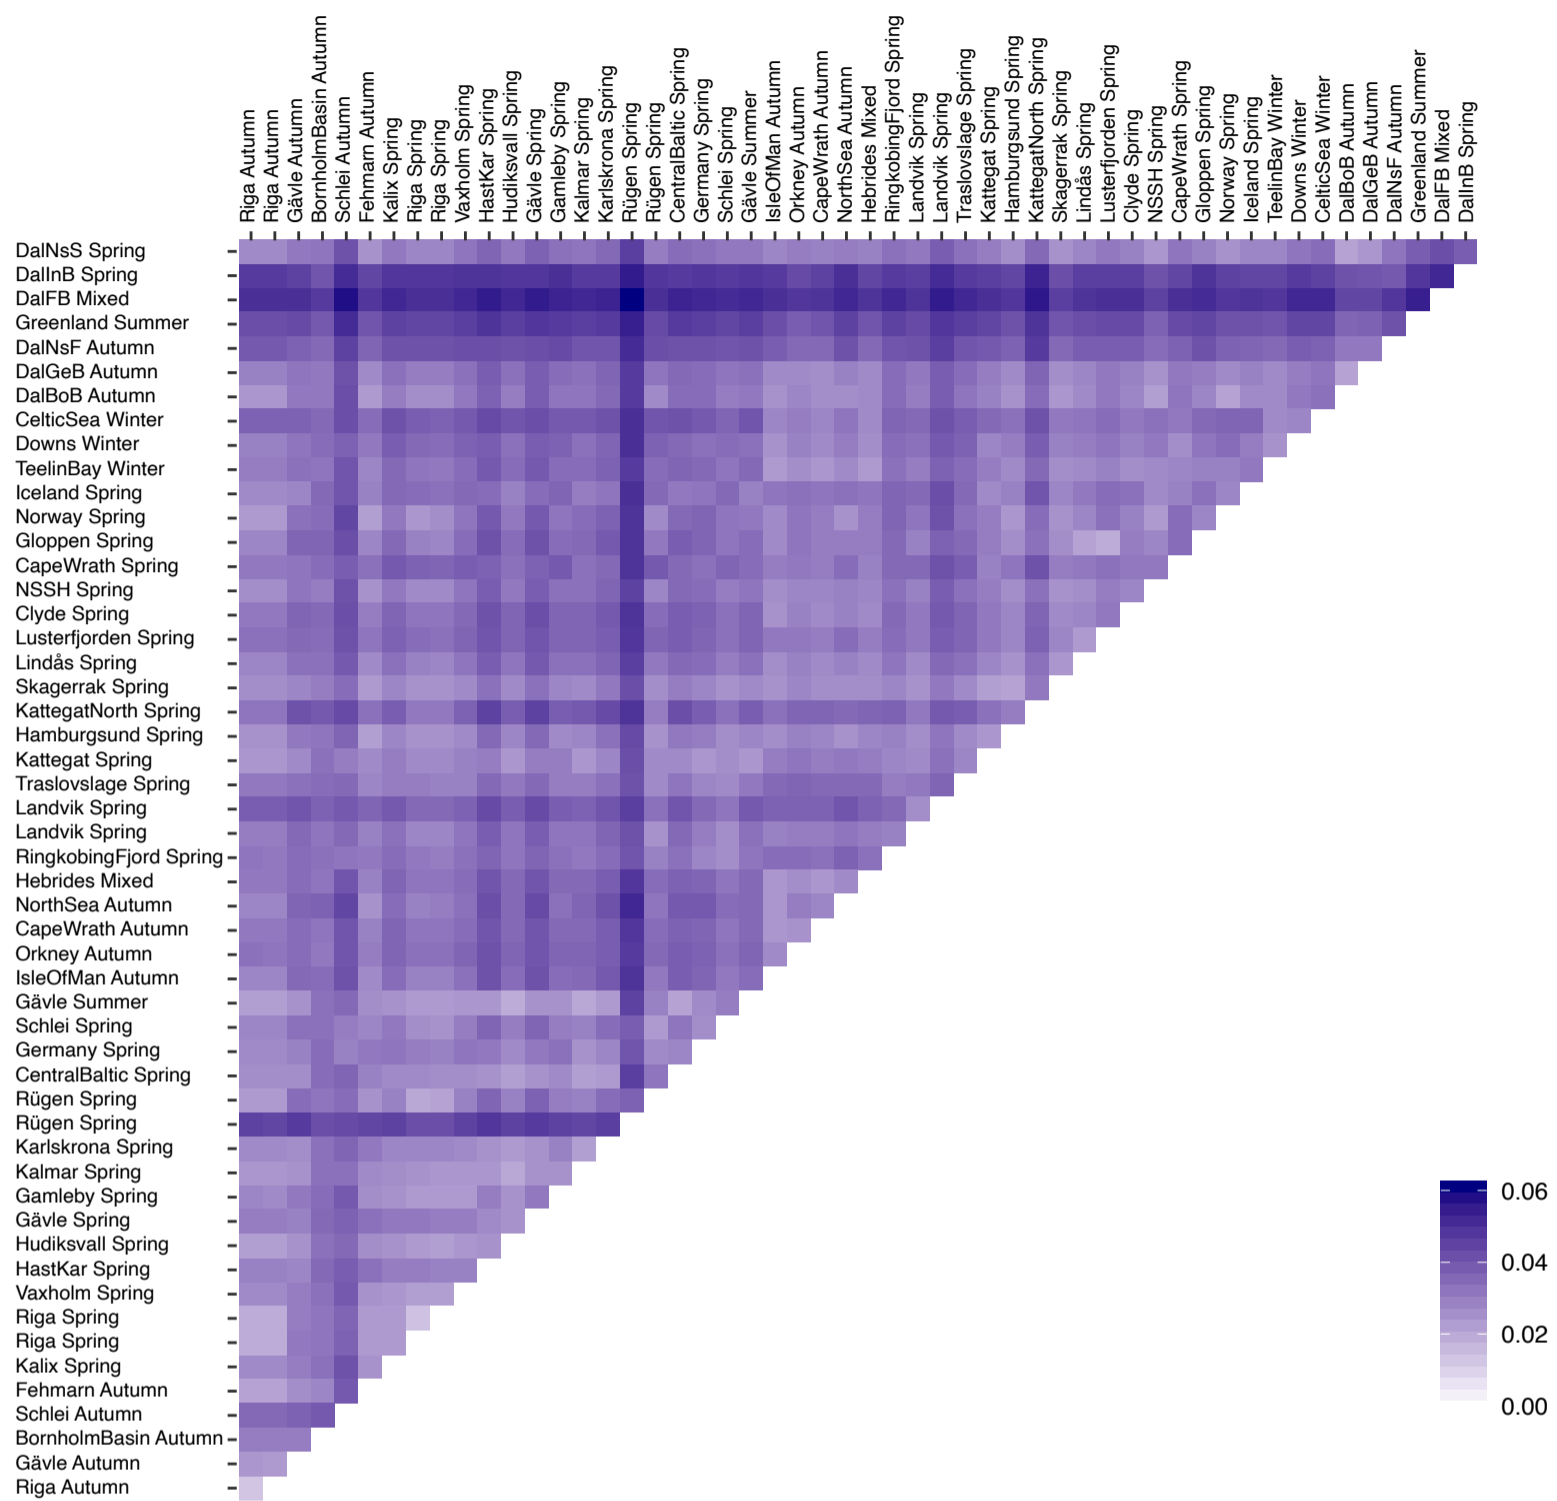

Supplement: supp [file elife-61076-supp-v1.zip › elife_poa_e61076_Figure_2_figure_supplement_2.pdf]
